# Supplementary material for: Neural pattern change during encoding of a narrative predicts retrospective duration estimates
Source: eLife. 2016 Nov 1;5:e16070. doi: 10.7554/eLife.16070 (PMC5243117; doi:10.7554/eLife.16070)
Supplement: Figure 5—source data 1. — Excel sheet 1 contains the Z-values for each participant and region, reflecting the strength of the empirical correlation between pattern distance and duration estimates relative to the distribution of null correlations. NaNs signify that a participant had fewer than 10 voxels in a given brain region, most likely due to signal dropout (this was only an issue for the frontal pole). The bar plots in Figure 5 were generated by plotting the mean Z-value (and standard error of the mean) across participants for each of the a priori ROIs. Excel sheet 2: T-values were obtained from a right-tailed t-test verifying whether the Z-values for a region were reliably positive across participants. The p-values from this t-test were then subjected to multiple comparisons correction using FDR. The three regions in bold survived whole-brain FDR correction at q<0.1 and are shown in Figure 5—figure supplement 1. Excel sheet 3 contains the Fisher-transformed Pearson’s r values for each participant and region. DOI: http://dx.doi.org/10.7554/eLife.16070.014 [file elife-16070-fig5-data1.xlsx]

## Sheet: Z-values
	Subject1	Subject2	Subject3	Subject4	Subject5	Subject6	Subject7	Subject8	Subject9	Subject10	Subject11	Subject12	Subject13	Subject14	Subject15	Subject16	Subject17	Subject18	Mean z-value	t-value
A priori ROIs
Left Lateral orbitofrontal cortex	0.884878	-0.551464	1.79473	1.16192	0.158331	0.058057	-0.384716	0.0269652	-1.66424	0.276266	0.0751352	-0.100277	-0.803156	0.125005	-1.25259	0.19132	3.31197	-0.550796	0.153186	0.573743
Right Lateral orbitofrontal cortex	0.454617	-0.00152587	0.419346	0.710167	-0.209238	-0.866213	0.0231394	0.751828	-1.62667	0.454375	0.0544558	-0.21983	0.773922	0.332114	0.591129	0.763584	1.12922	-0.110558	0.190215	1.22084
Left Pars orbitalis	0.700673	0.597519	-0.413925	0.0999206	-0.460835	0.071562	1.43826	0.398857	-1.24941	-0.0328397	0.164833	-0.507484	1.53904	0.372746	NaN	0.627673	3.72133	-0.628852	0.378769	1.39587
Right Pars orbitalis	1.28734	0.106892	1.44806	0.249607	0.497025	-0.233264	0.897083	0.946129	0.081431	-0.0907146	0.522991	0.993395	-0.937054	0.645778	0.0879589	0.70903	2.27791	1.06394	0.586307	3.41055
Left Pars triangularis	0.227628	-0.205866	1.32901	0.431872	-0.168663	-0.0671317	0.787611	1.03392	-1.20823	1.2252	-0.278012	0.560839	0.0943086	-0.318352	-0.527003	-0.407256	3.10898	-1.51116	0.228205	0.923434
Right Pars triangularis	-0.613056	-0.802757	1.23992	0.452736	-0.182669	-0.149988	1.15129	0.371745	-2.22906	0.199202	0.594058	0.987278	-0.161241	-0.716306	-0.0394846	0.639639	0.544975	-2.13049	-0.0469005	-0.20281
Left Pars opercularis	-0.00380973	-0.360343	0.527658	0.987422	0.112038	0.947604	-0.343884	0.278352	-1.28695	2.09474	0.86776	1.71412	0.224279	0.136211	0.540223	1.02546	0.867199	-2.04481	0.34907	1.50888
Right Pars opercularis	0.450291	-1.49796	0.725257	-0.786137	-0.189699	0.947774	0.683192	0.418687	0.0666111	0.68955	-0.412037	2.0847	0.337427	-0.405146	-0.236068	1.69656	0.157472	-0.46957	0.236716	1.16603
Left Caudal middle frontal cortex	0.833222	-0.354368	0.663487	0.313076	-0.754559	-0.93096	0.232861	0.641501	-0.71039	1.24268	0.695463	1.07757	-0.287564	0.64529	-0.512105	0.0844489	1.85206	-0.95828	0.209635	1.09189
Right Caudal middle frontal cortex	0.453209	-0.319045	0.820206	-0.409504	-1.64898	1.04694	1.17681	0.95066	0.960643	1.03239	0.932472	1.06791	0.379945	-0.24877	0.0473918	0.514971	1.91275	-0.754429	0.439753	2.17834
Left Rostral middle frontal cortex	0.429247	-0.467149	0.533432	0.276502	-0.437475	0.279791	0.580048	0.0814771	-1.75327	1.75357	1.75038	1.21266	-0.103108	-1.34298	-1.44639	1.59082	0.867701	-0.942725	0.159029	0.627034
Right Rostral middle frontal cortex	1.07381	-0.585287	0.95219	-1.45632	-0.39332	0.453572	0.868713	1.13774	-1.63664	1.25342	2.24705	1.48293	0.194136	-0.400372	0.493126	0.740311	0.856101	-0.29557	0.388088	1.62148
Left Superior frontal cortex	0.298785	-0.167637	0.673392	0.559682	-0.59842	-0.19647	0.858253	0.508851	-1.00683	2.00984	0.396756	0.268753	-0.529937	-0.536759	-1.20305	1.01035	1.00472	-0.51337	0.157606	0.815756
Right Superior frontal cortex	0.793736	-0.597107	1.02942	0.193013	-1.43597	-0.324721	0.65893	1.33811	-0.499791	1.37821	0.234788	0.696777	-0.381499	-1.29607	-0.733814	0.347652	2.53954	-0.816485	0.173595	0.711344
Left Frontal pole	NaN	NaN	0.0217165	NaN	NaN	NaN	-1.22428	NaN	NaN	0.886975	NaN	1.31163	0.813199	NaN	NaN	NaN	NaN	NaN	0.361849	0.807803
Right Frontal pole	1.32072	-0.403197	NaN	NaN	-0.953872	-0.949548	0.368989	NaN	-1.2844	0.649886	NaN	0.452924	0.406275	NaN	NaN	0.110556	0.665573	-0.789832	-0.0338266	-0.143234
Left Insula	-0.529249	0.623399	0.688326	1.08535	-0.968469	0.120717	-0.921992	1.03838	-0.431742	0.195079	0.392836	-0.161705	0.5327	2.53837	-0.360129	0.987735	1.70135	0.183157	0.373006	1.7525
Right Insula	-0.711882	1.18459	0.736464	1.45642	0.306146	0.322588	-0.433375	2.16421	-0.507661	0.390522	1.83182	0.0603579	-1.09996	2.04392	-0.583983	1.73055	0.312768	-0.611287	0.477345	1.94106
Left Putamen	0.945499	-0.324478	0.102601	0.911857	0.194525	-0.853842	-0.367445	-0.230685	-1.57525	0.441446	1.56874	-0.580106	0.48532	0.85865	-1.08865	1.33962	0.304504	0.498237	0.146141	0.732526
Right Putamen	0.808286	0.321169	0.851015	-0.0658207	0.796972	-1.18272	0.859345	0.140073	-1.71521	-0.97359	1.73178	0.18836	-1.27076	-0.0620871	-0.851003	1.99636	0.412911	0.356151	0.130068	0.543541
Left Inferior parietal cortex	-0.194355	-1.35729	0.896669	1.182	-0.956754	-1.05401	0.113235	0.607644	-1.58652	1.23476	0.11328	1.22627	0.715369	0.923096	-1.34302	0.365296	0.518872	-0.966034	0.0243613	0.104782
Right Inferior parietal cortex	-0.337251	-2.223	-0.0737099	-0.680331	-1.72714	-1.41285	0.604714	1.95867	-0.279874	2.17711	0.285031	0.461674	1.14615	-0.19613	0.0381941	-1.20189	0.078248	0.288216	-0.0607875	-0.223488
Left Parahippocampal cortex	0.762455	-0.549281	0.721873	0.907201	-0.824917	0.574961	-0.397766	1.23512	-0.496424	0.194575	0.402695	-0.697619	0.429835	0.1956	0.399306	0.993822	-1.01522	-0.882076	0.108563	0.639388
Right Parahippocampal cortex	0.0571465	-0.946113	1.36296	0.757582	0.083131	-0.429795	1.00582	1.8494	-0.290505	-1.61263	0.192766	0.998114	-1.12402	0.758464	-1.01378	0.636118	0.682134	0.14419	0.172832	0.783461
Left Entorhinal cortex	1.56076	-0.724613	1.56765	1.16959	-0.613736	-0.597973	1.01772	0.513325	-1.04644	0.72192	0.132671	0.00437706	0.803381	1.01004	-0.274382	0.514214	0.788488	0.763285	0.406126	2.1724
Right Entorhinal cortex	1.19093	-0.362138	0.493205	1.36812	-0.847702	-0.772646	0.225868	0.541782	0.232377	0.871494	1.15357	0.702485	0.65189	1.94301	0.427449	1.47104	0.671461	0.394746	0.575386	3.32622
Left Perirhinal cortex	1.09587	-0.782359	0.399703	-0.043925	-0.983778	-0.0491535	-0.423615	0.0727563	-1.55521	0.028074	-0.929601	-0.128382	1.09193	-0.655708	-1.06723	2.04078	2.06501	-0.39913	-0.0124434	-0.0516267
Right Perirhinal cortex	1.00632	-0.292389	1.57505	-0.235409	-1.2915	-0.169174	0.557615	0.209383	-0.51108	0.723135	1.42013	0.976843	-0.570007	0.115189	0.101013	1.18891	0.952097	1.32329	0.393301	2.06726
Left Hippocampus	1.24075	-0.987179	0.628247	-0.122542	-0.00636324	-1.03962	0.409151	1.07032	0.460812	-0.0971127	1.01394	0.421202	-0.110485	0.915531	0.237398	1.2635	0.174199	-0.376172	0.283088	1.75328
Right Hippocampus	0.922127	-1.34858	1.46641	0.0856031	0.300394	-1.24116	0.403715	0.96786	-0.507784	-0.533453	0.161411	0.464393	-0.449485	0.814642	-0.266261	1.25362	0.455595	0.298701	0.180431	0.971259
Left Amygdala	0.628112	-2.58251	1.62517	-1.04758	0.325798	-0.109602	-0.429694	-0.317472	-0.366949	-0.2992	-0.0816936	-0.589214	0.80677	0.457441	0.320061	1.69207	0.627869	0.54027	0.0666468	0.289513
Right Amygdala	1.26773	-2.06469	0.952506	1.45115	0.555836	-0.357253	0.0748669	1.1673	0.606316	-0.468696	-0.366443	0.429904	-0.516931	2.03767	0.128504	1.26598	0.275079	1.44189	0.437818	1.8948
-
Other Regions
Left Precuneus	-1.17326	-2.12281	-0.416703	0.0738833	-1.00037	0.151889	0.366748	0.372407	-2.22682	0.274787	0.848499	0.714077	-0.0700834	0.920541	-1.19658	-0.861778	0.513334	-0.997119	-0.323853	-1.41541
Right Precuneus	-0.866326	-2.0095	0.031741	-0.919645	-0.739971	0.0375329	-1.1243	0.96009	-2.34055	1.36098	0.0473691	-0.0203874	-0.161529	0.459399	-0.700166	-1.40911	-0.473418	-1.13187	-0.499981	-2.22713
Left Isthmus of the cingulate	0.551916	-0.436415	-0.299459	-1.85489	-0.359832	-0.833589	-0.422319	0.760937	-0.67411	0.59177	-0.268792	0.337766	-0.918386	0.28317	0.245319	1.4326	0.00424112	-0.716787	-0.143159	-0.80081
Right Isthmus of the cingulate	-1.15036	-1.79455	0.278213	-0.525624	-0.582996	-0.551126	-2.08173	0.449687	-0.722136	2.15858	0.658248	0.157786	-1.22524	0.484272	-0.186543	0.270605	-0.854571	0.00425068	-0.289624	-1.23679
Left Posterior cingulate cortex	0.536207	-1.64069	-0.287981	-0.0735265	-0.761342	0.341901	-0.816858	0.0589498	-0.3113	0.854763	-1.11242	1.45508	0.391756	0.146626	-0.693035	0.585022	0.833111	0.595817	0.00567128	0.0303806
Right Posterior cingulate cortex	-0.128026	-0.836903	-0.355367	1.62004	-1.75788	0.775561	-0.347644	1.04085	-0.237818	1.60944	-1.05039	0.959815	-1.11981	-0.423521	-0.733412	1.45505	-0.183438	0.1849	0.0261911	0.11054
Left Caudate	1.07787	0.204155	0.713453	1.48089	-0.540184	-0.861876	-0.0645677	1.01747	-1.51977	1.22724	-0.428968	1.03388	0.765533	0.580321	-1.94418	0.291613	0.456744	-0.402429	0.171511	0.757741
Right Caudate	1.51992	-0.9859	0.503269	-0.390188	-0.759443	-0.291904	0.18901	1.07742	-1.48182	0.728542	0.00744091	-0.0159489	0.683367	0.695024	-1.57945	0.590465	-0.621618	-0.514286	-0.0358937	-0.176229
Left Pallidum	0.260164	-0.306538	0.74715	0.153267	-0.954471	-0.270063	0.381607	-0.767971	-0.637687	-1.34912	1.43082	-1.05544	-1.21717	0.766632	-0.0347202	1.8876	1.6356	-0.715226	-0.00253138	-0.0108453
Right Pallidum	0.646667	-0.148369	0.348461	1.69639	-1.12492	-0.50057	0.829984	-0.308411	-0.493742	-1.97692	0.478254	-1.14222	-0.479423	2.43633	-0.769684	0.346277	0.381442	-1.01718	-0.0443132	-0.175777
Left Medial orbitofrontal cortex	0.443435	-0.65994	1.3481	1.00724	-0.448782	0.380092	0.755527	0.705021	-2.14554	0.169801	0.269423	-0.384024	0.729134	-0.914742	-0.228284	0.236966	1.01018	-0.407276	0.103685	0.519283
Right Medial orbitofrontal cortex	2.55145	-0.653035	1.58556	-1.12715	-0.707446	-0.398645	0.987862	-0.444131	-1.1863	0.52799	0.870975	0.403518	-0.129595	-1.19565	0.145288	-0.538528	1.58127	-0.0664763	0.122608	0.49008
Left Caudal anterior cingulate cortex	2.46107	-0.00150857	1.33056	2.35638	0.653266	-0.797585	0.433742	0.980626	0.74428	0.3554	0.495169	1.18471	-0.791112	1.86074	0.623854	1.31925	0.51911	0.478912	0.789271	3.76815
Right Caudal anterior cingulate cortex	1.82325	-0.0415864	-0.0513454	1.33535	-1.15692	-1.21428	1.40048	0.969502	-0.0271333	0.99367	0.684516	0.22287	-0.128233	-0.154044	0.720467	1.66488	0.15534	-0.940052	0.347596	1.60254
Left Rostral anterior cingulate cortex	-0.423442	-0.322994	0.389568	-0.393372	-0.0441923	0.266763	0.0523028	0.588491	-0.9746	0.225334	-0.201372	1.08451	-1.91048	0.0207985	0.469494	0.454962	1.54545	0.948544	0.0986533	0.534602
Right Rostral anterior cingulate cortex	-0.18918	-0.863422	0.749194	-0.343042	-1.03387	-0.694742	0.24034	-0.114815	-0.706626	0.323184	-0.726179	0.748994	-0.798473	-0.821146	0.852884	-0.137944	0.872806	-0.800671	-0.191262	-1.21541
Left Paracentral cortex	0.458751	-1.67124	0.436781	1.13277	-1.15228	-0.103535	-0.0407685	2.49189	-1.65703	-0.274401	0.278887	1.11699	-0.135407	1.09468	-0.276292	0.34673	-1.16425	-0.186327	0.0386641	0.155369
Right Paracentral cortex	0.761895	-0.257085	-0.337326	0.775756	0.665198	0.56453	-0.0495804	2.39196	-1.25044	0.899758	1.59619	0.930184	-0.633047	1.68636	0.703642	0.613739	-0.628611	-0.234174	0.455497	2.095
Left Precentral gyrus	1.84284	-0.190168	1.0018	1.55471	0.364397	-0.582801	-0.226435	0.881741	-1.06359	0.761521	-0.48754	0.703397	0.125261	1.35293	0.0665651	0.448841	0.368986	-1.00536	0.328728	1.67036
Right Precentral gyrus	1.24305	-1.65151	1.15028	-0.818764	-1.1271	1.09134	0.133083	1.31077	0.160236	-0.0989163	0.476953	1.07136	0.131995	0.476303	-0.458496	1.57164	0.236967	-0.134125	0.264726	1.25518
Left Postcentral gyrus	1.28129	-0.593652	0.272081	1.64983	-0.176379	0.00158367	-0.714611	0.539793	-0.818006	0.777985	0.49755	1.32929	-0.168264	0.868902	-0.36727	1.0008	0.62403	-0.630952	0.298555	1.65028
Right Postcentral gyrus	1.32022	-1.20579	1.0109	-0.790192	-1.11306	0.682335	1.57993	1.24863	-0.471119	-0.704693	-0.762171	1.11158	-0.143536	-1.16684	0.431487	2.27126	0.213107	-0.208289	0.183543	0.729939
Left Superior parietal cortex	1.40172	-0.527181	0.396122	0.105928	0.27785	-0.362165	-0.536461	0.343743	-1.38425	0.0581973	-0.558046	-0.132457	0.423076	0.176099	-1.77556	-0.480135	0.65171	0.251739	-0.0927818	-0.535093
Right Superior parietal cortex	1.23947	-1.22114	0.802006	0.636907	-0.939783	0.378307	-0.149867	1.80284	-0.403826	0.485794	1.60692	-0.0633472	0.330751	-1.10854	0.622994	-0.601541	0.419105	1.1384	0.276415	1.3138
Left Supramarginal gyrus	-0.0175348	-1.1989	1.20199	1.08252	-0.665328	0.414433	-0.605669	-0.528332	0.0632167	1.2822	-1.61199	1.91218	-0.942143	1.55657	-0.819373	0.63033	0.338014	-1.08479	0.055966	0.225602
Right Supramarginal gyrus	0.364313	-1.29577	0.527373	-0.246218	-0.521382	0.632272	0.27503	0.694748	1.02299	1.13264	-0.0146235	0.72626	-0.316963	-0.494275	0.993761	1.10923	-0.0639546	-1.26943	0.180889	1.00941
Left Superior temporal cortex	0.185409	-0.207017	0.710753	-0.19478	-0.740962	0.0630003	-0.0413308	0.857981	-1.55237	0.411246	-0.829421	0.0353622	0.624683	1.81862	-1.35853	0.0135388	0.746276	1.61031	0.119598	0.566986
Right Superior temporal cortex	0.32753	-0.197854	1.58349	-0.00793275	-0.834713	0.727287	1.65616	1.62897	-0.145471	1.91071	-0.416355	-0.0897779	0.152514	0.887617	-1.87706	0.14416	1.72268	0.851395	0.445742	1.85857
Left Banks of the Superior temporal sulcus	1.57468	0.207807	0.912914	2.82401	-0.613153	-0.488067	0.619454	0.569307	-1.31556	0.320605	-0.122759	-0.355177	-0.220195	-0.458678	-0.877357	0.558666	-0.159427	-0.679752	0.127628	0.555325
Right Banks of the Superior temporal sulcus	-0.395286	-0.122737	0.931249	-0.196571	-1.15832	0.783807	-0.478461	1.33121	-1.8037	0.269347	-0.118627	0.871114	-0.68617	-0.596177	0.686626	-1.18392	0.611948	1.14253	-0.00622991	-0.0296476
Left Transverse temporal cortex	1.85486	-0.00346083	0.796588	1.32929	0.392661	-0.793371	-0.459771	0.0835064	-0.0427144	0.672862	-0.426628	0.362719	-0.12981	1.20418	-1.14327	0.70033	1.21586	0.938098	0.363996	1.93304
Right Transverse temporal cortex	1.48667	-2.61865	1.4977	0.516875	-0.774342	-0.124955	0.836241	0.300896	1.79216	-1.16375	0.5217	1.17596	0.0738025	1.14254	-0.509482	0.978527	0.882791	-0.0259756	0.332706	1.28481
Left Middle temporal cortex	1.15752	-0.322894	0.08229	0.627892	-0.601958	-1.2787	0.72287	0.624728	-2.06817	-0.0100429	-0.879627	-0.0520213	-0.371391	0.659236	-1.05348	0.91122	0.514111	-0.485473	-0.101327	-0.498612
Right Middle temporal cortex	0.523868	-0.243917	1.06713	-0.528003	-0.985094	0.479596	1.96478	0.70494	-0.77988	1.0011	0.0485482	2.40631	-0.0686841	-0.474757	-0.907034	1.16967	0.371958	-0.501518	0.291611	1.27558
Left Inferior temporal cortex	0.0866298	-0.0411271	0.0993677	0.465388	-0.606853	-1.14552	0.741145	0.574089	-2.15547	-0.904121	0.272017	0.0713827	0.474108	0.668716	-1.69128	1.06042	1.14072	0.475958	-0.0230243	-0.105724
Right Inferior temporal cortex	0.48935	-0.779911	1.2438	0.122371	-0.693668	0.386841	0.93314	0.609761	-0.692889	0.434704	0.0284087	1.26971	0.0850312	0.100244	-1.50501	1.39511	-0.347581	1.6307	0.261673	1.30298
Left Lingual gyrus	-0.190356	0.0353252	-0.00645173	2.4827	-0.459508	-0.283537	0.627423	-0.135394	-0.284283	0.870773	-0.610827	-0.14934	-0.83778	-0.638222	-0.152989	-0.682281	1.32437	0.826526	0.0964526	0.486918
Right Lingual gyrus	-0.273449	-1.26135	0.14327	1.57065	-0.690746	0.378435	-0.423626	0.146236	-0.948294	0.419854	0.468762	1.14336	-0.0595734	0.401142	0.649508	-0.781437	0.686086	1.09107	0.147772	0.815721
Left Lateral occipital cortex	1.91725	-1.42247	-0.161488	2.1014	-0.622479	0.68906	-0.12947	-1.78884	-1.26455	1.15808	-0.934872	0.00438006	0.693167	-1.09421	-0.173517	0.412281	1.20191	1.18045	0.0981158	0.361215
Right Lateral occipital cortex	1.18601	-1.24403	0.326085	0.989617	-0.181615	0.339445	-0.610362	-0.0358853	-0.838577	0.916061	-0.224766	-0.288952	0.411706	-0.157459	-0.0270359	-0.572875	0.475303	0.946826	0.0783054	0.491295
Left Pericalcarine cortex	0.0112633	-0.358018	0.346248	2.0779	-1.01998	-1.53233	-0.623899	-0.864902	-2.41261	0.665503	0.553375	1.78378	-0.0365089	-1.3237	-0.0406022	0.611964	-0.464139	1.19028	-0.0797988	-0.294346
Right Pericalcarine cortex	-0.0459184	0.292987	0.625178	0.779002	-1.18119	1.26288	1.65135	-0.557291	-1.11971	0.652671	-0.420626	-0.924763	-1.079	0.392888	-0.105686	-0.75905	-0.639337	0.692125	-0.0268609	-0.132341
Left Cuneus	-0.634557	-0.749377	0.661299	0.466614	0.115732	-1.02085	0.874779	-0.112857	-1.79992	-0.843359	0.575509	1.14693	0.822977	-1.10197	1.00414	-0.719504	0.335229	0.790694	-0.0104712	-0.0504092
Right Cuneus	0.826644	0.803601	0.655822	1.05483	-0.649457	1.50563	0.428322	-0.633595	-3.63811	-0.658207	1.18834	0.986998	0.106116	-0.32538	-0.517267	-1.34041	-0.675485	0.50044	-0.021176	-0.0739659
Left Fusiform gyrus	0.56395	-0.0555284	0.449091	-0.175193	-1.03414	-0.692993	0.43299	0.187157	-2.1238	-0.688177	-0.377903	-0.483271	0.299764	0.34294	-1.20703	0.838629	1.91319	0.112412	-0.0943288	-0.447991
Right Fusiform gyrus	0.798454	-0.394646	1.97099	-0.102423	-0.439266	-0.295273	1.051	1.85331	-0.596011	0.328022	0.0375813	1.13764	-0.913304	-0.265268	-0.947638	0.47252	-0.0614719	1.03761	0.259546	1.25154
Left Thalamus proper	0.611527	-0.401565	0.793582	0.663118	0.279786	-1.73736	-0.252377	-0.214819	-0.885712	-0.713387	0.675948	1.85063	-0.44676	0.609231	-0.91818	0.389561	0.785649	-0.179905	0.0504982	0.253365
Right Thalamus proper	-0.00605675	-0.955227	0.700955	1.60076	-1.70015	-0.51633	1.07691	-0.162527	-1.20453	0.299755	-0.639825	0.509232	0.0481146	2.21696	-0.72952	-0.404379	0.462081	0.190353	0.0436989	0.189064
Left Brainstem	0.981519	-0.42728	0.385005	-0.359974	-0.604235	0.283188	-0.0753414	1.98243	-0.360475	-1.10149	-0.0502585	-0.537191	-1.47866	2.59762	-0.450865	1.5796	-0.358261	-0.636186	0.0760637	0.301312
Right Brainstem	0.993673	-0.437216	0.381746	-0.377688	-0.617734	0.281597	-0.0779204	2.02409	-0.369529	-1.09357	-0.0644172	-0.534688	-1.4761	2.61664	-0.443477	1.56303	-0.331351	-0.618775	0.0787951	0.310549
Left Temporal pole	1.32874	-0.214269	1.19943	0.54586	-1.38896	-0.204265	1.41129	0.761482	-0.658434	0.557711	-0.937676	0.418098	-0.411764	-0.354676	-2.42973	0.997317	1.10331	0.411798	0.118626	0.486196
Right Temporal pole	0.835328	-0.210441	0.785176	0.263053	NaN	0.937709	0.0919296	1.37805	0.157359	1.19264	-0.679169	0.955869	-1.64979	0.001053	-0.168331	1.6745	0.357877	-0.0962574	0.342738	1.72554

## Sheet: t-values
Frontal Lobe Regions	T (df = 17)	Temporal Lobe Regions	T (df = 17)
Left Medial orbitofrontal cortex	0.519283	Left Superior temporal cortex	0.566986
Right Medial orbitofrontal cortex	0.49008	Right Superior temporal cortex	1.85857
Left Lateral orbitofrontal cortex	0.573743	Left Banks of the Superior temporal sulcus	0.555325
Right Lateral orbitofrontal cortex	1.22084	Right Banks of the Superior temporal sulcus	-0.0296476
Left Pars orbitalis	1.39587	Left Transverse temporal cortex	1.93304
Right Pars orbitalis	3.41055	Right Transverse temporal cortex	1.28481
Left Pars triangularis	0.923434	Left Middle temporal cortex	-0.498612
Right Pars triangularis	-0.20281	Right Middle temporal cortex	1.27558
Left Pars opercularis	1.50888	Left Inferior temporal cortex	-0.105724
Right Pars opercularis	1.16603	Right Inferior temporal cortex	1.30298
Left Caudal middle frontal cortex	1.09189	Left Lingual gyrus	0.486918
Right Caudal middle frontal cortex	2.17834	Right Lingual gyrus	0.815721
Left Rostral middle frontal cortex	0.627034	Left Fusiform gyrus	-0.447991
Right Rostral middle frontal cortex	1.62148	Right Fusiform gyrus	1.25154
Left Superior frontal cortex	0.815756	Left Parahippocampal cortex	0.639388
Right Superior frontal cortex	0.711344	Right Parahippocampal cortex	0.783461
Left Frontal pole	0.807803	Left Entorhinal cortex	2.1724
Right Frontal pole	-0.143234	Right Entorhinal cortex	3.32622
Left Caudal anterior cingulate cortex	3.76815	Left Perirhinal cortex	-0.0516267
Right Caudal anterior cingulate cortex	1.60254	Right Perirhinal cortex	2.06726
Left Rostral anterior cingulate cortex	0.534602	Left Hippocampus	1.75328
Right Rostral anterior cingulate cortex	-1.21541	Right Hippocampus	0.971259
Left Paracentral cortex	0.155369	Left Amygdala	0.289513
Right Paracentral cortex	2.095	Right Amygdala	1.8948
Left Precentral gyrus	1.67036	Left Temporal pole	0.486196
Right Precentral gyrus	1.25518	Right Temporal pole	1.72554
Parietal Lobe Regions	T (df = 17)	Other Regions	T (df = 17)
Left Precuneus	-1.41541	Left Insula	1.7525
Right Precuneus	-2.22713	Right Insula	1.94106
Left Isthmus of the cingulate	-0.80081	Left Putamen	0.732526
Right Isthmus of the cingulate	-1.23679	Right Putamen	0.543541
Left Posterior cingulate cortex	0.0303806	Left Caudate	0.757741
Right Posterior cingulate cortex	0.11054	Right Caudate	-0.176229
Left Postcentral gyrus	1.65028	Left Pallidum	-0.0108453
Right Postcentral gyrus	0.729939	Right Pallidum	-0.175777
Left Superior parietal cortex	-0.535093	Left Lateral occipital cortex	0.361215
Right Superior parietal cortex	1.3138	Right Lateral occipital cortex	0.491295
Left Supramarginal gyrus	0.225602	Left Pericalcarine cortex	-0.294346
Right Supramarginal gyrus	1.00941	Right Pericalcarine cortex	-0.132341
Left Inferior parietal cortex	0.104782	Left Cuneus	-0.0504092
Right Inferior parietal cortex	-0.223488	Right Cuneus	-0.0739659
		Left Thalamus proper	0.253365
		Right Thalamus proper	0.189064
		Left Brainstem	0.301312
		Right Brainstem	0.310549

## Sheet: Fisher-transformed Pearson's R
	Subject1	Subject2	Subject3	Subject4	Subject5	Subject6	Subject7	Subject8	Subject9	Subject10	Subject11	Subject12	Subject13	Subject14	Subject15	Subject16	Subject17	Subject18	Mean Fisher-transformed Pearson's r
A priori ROIs
Left Lateral orbitofrontal cortex	0.365694	-0.215984	0.811541	0.237363	0.0490151	0.0151072	-0.129666	0.00824893	-0.583769	0.0645126	0.025737	-0.0444822	-0.192804	0.0320522	-0.396166	0.0500651	1.28967	-0.178844	0.0670719
Right Lateral orbitofrontal cortex	0.171388	0.0035817	0.179699	0.160631	-0.0700322	-0.238951	0.0106341	0.241046	-0.594645	0.102987	0.0141404	-0.0810641	0.189884	0.0947579	0.169063	0.225357	0.487458	-0.0393596	0.057032
Left Pars orbitalis	0.261071	0.230003	-0.186953	0.0268845	-0.163423	0.024717	0.451682	0.124212	-0.471803	-0.00403382	0.0508199	-0.222425	0.387059	0.0850751	NaN	0.179093	1.47321	-0.203831	0.12008
Right Pars orbitalis	0.571272	0.033527	0.717433	0.0528972	0.178346	-0.063595	0.266801	0.287531	0.0365029	-0.0191421	0.155157	0.359338	-0.248985	0.156015	0.0275258	0.209844	0.889443	0.338745	0.21937
Left Pars triangularis	0.0892541	-0.0841211	0.627353	0.0958366	-0.0582706	-0.0150692	0.245808	0.300272	-0.447715	0.277265	-0.082033	0.217184	0.0267423	-0.0790811	-0.181082	-0.121434	1.27446	-0.532039	0.0862965
Right Pars triangularis	-0.24064	-0.302799	0.58355	0.107005	-0.0564174	-0.0379393	0.372929	0.112204	-0.782969	0.0489302	0.178955	0.352019	-0.0410118	-0.17851	-0.0110205	0.185467	0.217092	-0.732427	-0.0125325
Left Pars opercularis	0.00358494	-0.151269	0.238842	0.240775	0.0320955	0.255608	-0.109555	0.0770982	-0.467814	0.457708	0.272172	0.633737	0.0603014	0.0333842	0.174515	0.287082	0.362162	-0.719712	0.0933732
Right Pars opercularis	0.178987	-0.568039	0.340431	-0.190936	-0.0546639	0.245269	0.209161	0.118646	0.024047	0.160247	-0.128828	0.798132	0.0909931	-0.10517	-0.0751211	0.444897	0.071573	-0.151777	0.0782137
Left Caudal middle frontal cortex	0.326393	-0.133042	0.318994	0.0726057	-0.222476	-0.260944	0.0748281	0.184929	-0.261562	0.268756	0.216964	0.407491	-0.0797016	0.160967	-0.153814	0.0250453	0.7826	-0.317206	0.0783793
Right Caudal middle frontal cortex	0.179125	-0.126305	0.361423	-0.101842	-0.521353	0.267704	0.366659	0.284258	0.341916	0.228183	0.291315	0.388584	0.108016	-0.0649625	0.0147911	0.130787	0.812583	-0.250646	0.150569
Left Rostral middle frontal cortex	0.183849	-0.18389	0.237086	0.0679022	-0.152569	0.0815343	0.1848	0.0274606	-0.655701	0.399909	0.555025	0.467831	-0.0277569	-0.316121	-0.433753	0.428376	0.347662	-0.311346	0.0500166
Right Rostral middle frontal cortex	0.454015	-0.213013	0.455658	-0.318262	-0.124204	0.123097	0.290058	0.35129	-0.579053	0.272887	0.704421	0.567604	0.0491919	-0.0987549	0.157276	0.192022	0.337822	-0.0891392	0.140717
Left Superior frontal cortex	0.124359	-0.0759116	0.292043	0.123619	-0.182928	-0.0457407	0.272398	0.147654	-0.371259	0.450469	0.12308	0.108985	-0.138129	-0.12772	-0.370959	0.270674	0.410781	-0.156899	0.047473
Right Superior frontal cortex	0.348745	-0.235183	0.485572	0.0477081	-0.44157	-0.0929406	0.200266	0.366945	-0.181019	0.300612	0.0735332	0.284762	-0.101439	-0.312943	-0.236109	0.0884213	1.05494	-0.258987	0.0772955
Left Frontal pole	NaN	NaN	0.0156692	NaN	NaN	NaN	-0.38776	NaN	NaN	0.196701	NaN	0.525023	0.187663	NaN	NaN	NaN	NaN	NaN	0.107459
Right Frontal pole	0.529213	-0.147162	NaN	NaN	-0.316523	-0.289248	0.103456	NaN	-0.465856	0.143007	NaN	0.185564	0.0988311	NaN	NaN	0.0345296	0.240865	-0.258098	-0.0117851
Left Insula	-0.219871	0.268593	0.318344	0.249673	-0.296101	0.0353876	-0.286999	0.330554	-0.159659	0.0413175	0.121627	-0.0658721	0.139623	0.628438	-0.121676	0.292356	0.763811	0.0604937	0.116669
Right Insula	-0.257117	0.496004	0.342704	0.368017	0.0972866	0.087796	-0.129407	0.676203	-0.176725	0.0863762	0.571056	0.0268633	-0.280003	0.502543	-0.187721	0.51386	0.136725	-0.198231	0.148679
Left Putamen	0.413098	-0.131273	0.0430126	0.210946	0.0581926	-0.237733	-0.123807	-0.0745501	-0.564077	0.10149	0.478706	-0.235654	0.120114	0.204415	-0.344	0.399031	0.128123	0.160319	0.0336862
Right Putamen	0.311475	0.117351	0.374029	-0.0185817	0.205738	-0.331383	0.265093	0.0436321	-0.596261	-0.202834	0.54613	0.0774606	-0.3642	-0.0111883	-0.273069	0.586925	0.167031	0.11791	0.0564033
Left Inferior parietal cortex	-0.0804692	-0.513239	0.395277	0.268134	-0.289176	-0.287588	0.0354453	0.186563	-0.572913	0.26882	0.037607	0.474842	0.195194	0.212941	-0.400097	0.115992	0.217917	-0.302388	-0.00206325
Right Inferior parietal cortex	-0.133799	-0.818216	-0.0267164	-0.16693	-0.548828	-0.379803	0.197575	0.596854	-0.107607	0.483731	0.0937123	0.182327	0.301934	-0.0536128	0.0152898	-0.354321	0.0326179	0.0945427	-0.0328471
Left Parahippocampal cortex	0.337238	-0.205968	0.32208	0.212576	-0.233434	0.166873	-0.140212	0.363633	-0.165067	0.0426766	0.12423	-0.283125	0.105599	0.0448063	0.128743	0.297134	-0.396616	-0.279223	0.0245524
Right Parahippocampal cortex	0.0263789	-0.365707	0.577878	0.199121	0.0294606	-0.123272	0.290823	0.591172	-0.090752	-0.360083	0.0562337	0.386834	-0.311349	0.186919	-0.310855	0.190701	0.317349	0.0485432	0.074411
Left Entorhinal cortex	0.613234	-0.284559	0.714339	0.255457	-0.173618	-0.184513	0.3067	0.158233	-0.370611	0.172985	0.0412687	0.00337734	0.206586	0.240444	-0.0850737	0.153312	0.331387	0.248284	0.130402
Right Entorhinal cortex	0.496197	-0.15795	0.228489	0.312947	-0.323876	-0.223043	0.0721888	0.174719	0.0832533	0.193203	0.358547	0.254984	0.18368	0.502064	0.13431	0.452056	0.308827	0.133218	0.176879
Left Perirhinal cortex	0.441421	-0.314101	0.173314	-0.0115821	-0.309918	-0.0136797	-0.128991	0.026069	-0.552786	0.00365207	-0.270282	-0.0469655	0.264582	-0.151307	-0.30315	0.632023	0.883358	-0.12529	0.0109094
Right Perirhinal cortex	0.40196	-0.107241	0.764096	-0.0543031	-0.437576	-0.0478367	0.174222	0.0619708	-0.187042	0.162493	0.439028	0.370442	-0.154734	0.0291312	0.028856	0.359531	0.407684	0.465851	0.148696
Left Hippocampus	0.593089	-0.403439	0.295456	-0.0297273	0.00398757	-0.293803	0.134278	0.315825	0.169208	-0.0211448	0.313835	0.175368	-0.0256254	0.227665	0.0644817	0.366466	0.0784046	-0.128702	0.101979
Right Hippocampus	0.370618	-0.53249	0.668332	0.0200636	0.0977705	-0.364994	0.126332	0.315804	-0.192301	-0.11375	0.0493966	0.183602	-0.114376	0.23928	-0.0831668	0.369907	0.20169	0.100639	0.0745754
Left Amygdala	0.269214	-0.981368	0.659375	-0.2224	0.108203	-0.0319712	-0.128967	-0.0934735	-0.133949	-0.0614833	-0.0264353	-0.188774	0.210037	0.111932	0.0975963	0.491826	0.269326	0.182291	0.0294988
Right Amygdala	0.461045	-0.82477	0.435095	0.352166	0.176325	-0.101449	0.0227832	0.344367	0.224905	-0.107745	-0.121034	0.16478	-0.141544	0.519544	0.0364615	0.343903	0.12869	0.476158	0.13276
-
Other Regions
Left Precuneus	-0.452149	-0.800919	-0.192677	0.0168268	-0.301012	0.0401663	0.105164	0.112911	-0.816172	0.0603602	0.274309	0.257773	-0.0242123	0.227076	-0.364123	-0.241886	0.222844	-0.316767	-0.121805
Right Precuneus	-0.319556	-0.724654	0.0164902	-0.212367	-0.217279	0.0112268	-0.318543	0.282721	-0.834538	0.301414	0.0166577	-0.0104733	-0.0510157	0.112194	-0.220572	-0.408359	-0.193432	-0.363244	-0.174074
Left Isthmus of the cingulate	0.221825	-0.16663	-0.146783	-0.449287	-0.103272	-0.245067	-0.12646	0.239994	-0.252941	0.140469	-0.0790704	0.126055	-0.246491	0.0678722	0.0737705	0.394436	-0.0031124	-0.237825	-0.0440286
Right Isthmus of the cingulate	-0.457119	-0.668428	0.136116	-0.123783	-0.168639	-0.161212	-0.652463	0.137604	-0.269486	0.486404	0.205547	0.0628293	-0.331518	0.116823	-0.0622384	0.0807327	-0.36453	-0.0013839	-0.113041
Left Posterior cingulate cortex	0.201598	-0.685559	-0.123217	-0.0126195	-0.21569	0.095522	-0.237857	0.0200656	-0.113621	0.193945	-0.363807	0.498811	0.101451	0.0324763	-0.228528	0.164611	0.346011	0.193585	-0.00737901
Right Posterior cingulate cortex	-0.0491833	-0.344047	-0.158084	0.364774	-0.497803	0.21889	-0.104986	0.311423	-0.0768646	0.374985	-0.328145	0.345733	-0.288737	-0.106734	-0.214328	0.391807	-0.0747468	0.0710101	-0.00916877
Left Caudate	0.48965	0.0838876	0.329579	0.326019	-0.154913	-0.261218	-0.018687	0.310981	-0.536167	0.282906	-0.144437	0.399606	0.208507	0.139846	-0.580325	0.0859265	0.182161	-0.14238	0.055608
Right Caudate	0.524532	-0.39422	0.237301	-0.0893933	-0.21842	-0.0823045	0.0588417	0.360538	-0.51221	0.169416	0.000281132	-0.00443285	0.176005	0.173229	-0.487488	0.167826	-0.264978	-0.166703	-0.0195656
Left Pallidum	0.0990566	-0.128316	0.347711	0.0332411	-0.28719	-0.0749786	0.115695	-0.229551	-0.232936	-0.303707	0.444761	-0.36526	-0.327226	0.193124	-0.0162053	0.58129	0.687696	-0.235289	0.0167731
Right Pallidum	0.258152	-0.0590401	0.169229	0.400743	-0.332718	-0.13666	0.236062	-0.097173	-0.179426	-0.453241	0.153013	-0.417785	-0.129395	0.584496	-0.254551	0.109893	0.178088	-0.351292	-0.017867
Left Medial orbitofrontal cortex	0.163227	-0.247123	0.711973	0.204688	-0.135747	0.110954	0.24159	0.220719	-0.759266	0.0385117	0.0855317	-0.165433	0.18209	-0.22401	-0.0738513	0.0648178	0.412385	-0.128635	0.0390233
Right Medial orbitofrontal cortex	0.973593	-0.249626	0.750762	-0.228258	-0.224136	-0.107879	0.305651	-0.130418	-0.431582	0.130248	0.283936	0.163649	-0.0340458	-0.272041	0.050197	-0.157035	0.629754	-0.0185684	0.0796778
Left Caudal anterior cingulate cortex	1.01339	-0.00371409	0.625647	0.504332	0.186123	-0.243612	0.14284	0.290569	0.260994	0.0823753	0.166815	0.410764	-0.217488	0.461041	0.196406	0.367719	0.212879	0.164986	0.256781
Right Caudal anterior cingulate cortex	0.743711	-0.0128703	-0.0188661	0.287707	-0.306878	-0.336371	0.403553	0.275982	-0.0101004	0.21991	0.212741	0.0817483	-0.0358285	-0.037096	0.227847	0.466379	0.065785	-0.307124	0.106679
Left Rostral anterior cingulate cortex	-0.160116	-0.131939	0.175324	-0.0805411	-0.0110415	0.0828059	0.0242945	0.184576	-0.353866	0.0563929	-0.0725011	0.439515	-0.502325	0.00224687	0.141775	0.13134	0.649401	0.320566	0.0497726
Right Rostral anterior cingulate cortex	-0.0660054	-0.343009	0.335554	-0.069748	-0.319374	-0.202026	0.0709384	-0.0340085	-0.255668	0.077537	-0.243697	0.304264	-0.215593	-0.207329	0.252568	-0.0386029	0.37474	-0.263687	-0.0468415
Left Paracentral cortex	0.183257	-0.649086	0.201223	0.244597	-0.342498	-0.0291546	-0.00791339	0.76416	-0.624841	-0.0599165	0.0908811	0.434906	-0.0327959	0.25379	-0.0838124	0.096882	-0.486223	-0.0605372	-0.00594909
Right Paracentral cortex	0.291726	-0.10175	-0.154257	0.167322	0.197061	0.167447	-0.0207508	0.763624	-0.482316	0.20789	0.478765	0.329368	-0.166263	0.386767	0.20414	0.174294	-0.248536	-0.0750226	0.11775
Left Precentral gyrus	0.849673	-0.0697002	0.442257	0.391321	0.11103	-0.161252	-0.0885091	0.268519	-0.397667	0.168382	-0.14474	0.24807	0.0348841	0.329702	0.0167478	0.139656	0.145371	-0.335522	0.108235
Right Precentral gyrus	0.542214	-0.625257	0.520223	-0.177115	-0.345594	0.295743	0.0488908	0.392692	0.0739607	-0.0211178	0.152043	0.410748	0.0343824	0.119454	-0.144662	0.455143	0.109972	-0.0350223	0.100372
Left Postcentral gyrus	0.609189	-0.228592	0.123345	0.380063	-0.0603483	-0.00137138	-0.235141	0.173299	-0.310277	0.175165	0.156931	0.483196	-0.0481765	0.216274	-0.10211	0.306025	0.255226	-0.212466	0.0933461
Right Postcentral gyrus	0.49912	-0.454446	0.451039	-0.18359	-0.354706	0.189326	0.530142	0.369377	-0.185447	-0.159174	-0.245876	0.417116	-0.0453195	-0.271133	0.13182	0.705751	0.0933274	-0.0694175	0.0787728
Left Superior parietal cortex	0.537212	-0.201876	0.162769	0.0279245	0.0744363	-0.102208	-0.159924	0.0953434	-0.495881	0.0119647	-0.18433	-0.0473457	0.106722	0.0384107	-0.522398	-0.145335	0.262977	0.0829227	-0.0254785
Right Superior parietal cortex	0.449305	-0.447038	0.327165	0.149296	-0.289525	0.10343	-0.045386	0.507546	-0.146821	0.115381	0.530138	-0.0116696	0.0914635	-0.276972	0.187456	-0.17694	0.16311	0.355339	0.088071
Left Supramarginal gyrus	-0.0127444	-0.469307	0.518103	0.23684	-0.197494	0.117577	-0.18992	-0.1577	0.0201783	0.275549	-0.514911	0.698824	-0.250934	0.352991	-0.26529	0.201636	0.148183	-0.373537	0.00766916
Right Supramarginal gyrus	0.139578	-0.476304	0.23874	-0.0623609	-0.154833	0.181327	0.091526	0.190376	0.369373	0.280783	-0.00629561	0.27511	-0.0868926	-0.111288	0.345475	0.328879	-0.0230505	-0.412841	0.0615167
Left Superior temporal cortex	0.0814674	-0.0912154	0.312152	-0.0458058	-0.249935	0.0160687	-0.00849548	0.241475	-0.542661	0.0915713	-0.250392	0.0128009	0.145103	0.43933	-0.416079	0.00238996	0.342658	0.531068	0.0339722
Right Superior temporal cortex	0.131572	-0.0776534	0.787642	-0.00110449	-0.268356	0.185947	0.59016	0.446444	-0.0560199	0.447217	-0.126211	-0.0266018	0.0417611	0.207162	-0.589856	0.0487404	0.748156	0.277191	0.153677
Left Banks of the Superior temporal sulcus	0.634504	0.0899358	0.391147	0.65762	-0.179758	-0.12875	0.214177	0.170616	-0.476221	0.0765537	-0.0438736	-0.127989	-0.0520831	-0.114743	-0.271387	0.165275	-0.0669936	-0.225856	0.0395652
Right Banks of the Superior temporal sulcus	-0.141544	-0.0429788	0.469006	-0.0456413	-0.343383	0.224354	-0.174856	0.363901	-0.634279	0.0539168	-0.0414873	0.313157	-0.191139	-0.151215	0.214809	-0.365767	0.273877	0.382373	0.00906128
Left Transverse temporal cortex	0.730166	0.00618596	0.370328	0.331804	0.111107	-0.224624	-0.138948	0.0232096	-0.00994855	0.160171	-0.136867	0.12967	-0.0362018	0.291036	-0.35151	0.207281	0.496765	0.331142	0.127265
Right Transverse temporal cortex	0.570001	-0.99799	0.702964	0.125034	-0.225986	-0.0349011	0.264285	0.0997323	0.639907	-0.263483	0.160601	0.447301	0.0228637	0.273257	-0.174803	0.283127	0.37519	-0.00943016	0.125426
Left Middle temporal cortex	0.499606	-0.137083	0.0368759	0.130919	-0.191865	-0.355609	0.23921	0.165834	-0.734164	-0.00151187	-0.281016	-0.0191017	-0.0946326	0.166625	-0.304242	0.261236	0.222833	-0.157086	-0.0307318
Right Middle temporal cortex	0.196056	-0.0847483	0.503347	-0.132776	-0.322709	0.125964	0.68121	0.197227	-0.29486	0.211589	0.0153049	0.935868	-0.0156857	-0.112362	-0.2825	0.33816	0.175194	-0.169039	0.10918
Left Inferior temporal cortex	0.0363841	-0.0187852	0.0558398	0.102757	-0.20583	-0.308105	0.257226	0.154864	-0.802173	-0.201303	0.086764	0.0303507	0.122784	0.161009	-0.488003	0.31374	0.530606	0.170087	-9.9283e-05
Right Inferior temporal cortex	0.196486	-0.314024	0.609904	0.0318041	-0.240543	0.1002	0.3272	0.18445	-0.26363	0.0946193	0.00590168	0.527236	0.0231414	0.0231039	-0.452899	0.3799	-0.14446	0.556607	0.0913888
Left Lingual gyrus	-0.082561	0.01555	-0.0149655	0.580215	-0.14565	-0.0874345	0.197756	-0.0416405	-0.0953588	0.191405	-0.201415	-0.0560644	-0.20589	-0.151194	-0.0516445	-0.191723	0.577118	0.264663	0.0278426
Right Lingual gyrus	-0.107413	-0.473969	0.0678574	0.382119	-0.206297	0.105945	-0.133572	0.0413225	-0.341342	0.097995	0.153492	0.419438	-0.0206425	0.0934441	0.197046	-0.223606	0.295985	0.355152	0.0390531
Left Lateral occipital cortex	0.784714	-0.534995	-0.0696055	0.491997	-0.18477	0.191384	-0.0345518	-0.54267	-0.449463	0.251892	-0.299538	0.00022775	0.183496	-0.274868	-0.0499168	0.126993	0.550484	0.384689	0.0291943
Right Lateral occipital cortex	0.423326	-0.479566	0.138532	0.257426	-0.0617298	0.0968537	-0.209711	-0.00549	-0.302032	0.196777	-0.0761865	-0.112226	0.110299	-0.0378922	-0.00905782	-0.160136	0.209945	0.314365	0.0163053
Left Pericalcarine cortex	-0.000118434	-0.140513	0.148126	0.522468	-0.305432	-0.444854	-0.196286	-0.276764	-0.856978	0.140089	0.172179	0.678649	-0.00937726	-0.319537	-0.0112821	0.177573	-0.193412	0.385393	-0.0294487
Right Pericalcarine cortex	-0.0180526	0.120822	0.265258	0.195056	-0.317975	0.353688	0.492711	-0.158743	-0.414151	0.142755	-0.133669	-0.336547	-0.306789	0.0978796	-0.0302008	-0.228499	-0.278141	0.231518	-0.0179488
Left Cuneus	-0.246623	-0.29686	0.280262	0.105392	0.0305751	-0.304084	0.27152	-0.0379562	-0.612278	-0.194967	0.186938	0.401866	0.211428	-0.266114	0.321292	-0.233348	0.138631	0.270523	0.00145549
Right Cuneus	0.330387	0.311472	0.292289	0.257246	-0.191294	0.438336	0.134776	-0.183844	-1.29621	-0.144571	0.37995	0.362124	0.0277512	-0.0782892	-0.165587	-0.390125	-0.260229	0.168201	-0.000423158
Left Fusiform gyrus	0.262745	-0.018116	0.206182	-0.0407126	-0.340117	-0.206985	0.147636	0.0569462	-0.777336	-0.162892	-0.126336	-0.195615	0.0720696	0.0792756	-0.34634	0.247727	0.855205	0.033901	-0.0140424
Right Fusiform gyrus	0.320234	-0.154164	0.845451	-0.0277559	-0.152572	-0.0900105	0.362359	0.568761	-0.230076	0.0678255	0.0117432	0.436935	-0.232724	-0.06777	-0.282293	0.135273	-0.0285877	0.348786	0.101745
Left Thalamus proper	0.262097	-0.163301	0.378012	0.154741	0.0812536	-0.499506	-0.0774867	-0.0742733	-0.313614	-0.156339	0.228525	0.766685	-0.112863	0.163064	-0.258911	0.109568	0.336804	-0.0637152	0.0422633
Right Thalamus proper	0.00689952	-0.379053	0.321454	0.369212	-0.498973	-0.150937	0.345992	-0.0455841	-0.427592	0.0668275	-0.205902	0.219395	0.0120565	0.554786	-0.226948	-0.113499	0.200128	0.0636223	0.00621572
Left Brainstem	0.430135	-0.17182	0.177081	-0.0762816	-0.17284	0.0781821	-0.0249009	0.622035	-0.127496	-0.251871	-0.0178309	-0.199968	-0.373245	0.60842	-0.132202	0.482857	-0.146461	-0.20282	0.0278319
Right Brainstem	0.430135	-0.17182	0.177081	-0.0762816	-0.17284	0.0781821	-0.0249009	0.622035	-0.127496	-0.251871	-0.0178309	-0.199968	-0.373245	0.60842	-0.132202	0.482857	-0.146461	-0.20282	0.0278319
Left Temporal pole	0.519752	-0.0827226	0.518756	0.107641	-0.410601	-0.0685635	0.458037	0.231589	-0.24866	0.129529	-0.310589	0.160703	-0.113878	-0.0831341	-0.730509	0.285681	0.446084	0.134914	0.052446
Right Temporal pole	0.329393	-0.0884762	0.354584	0.0525018	NaN	0.268275	0.0311482	0.433196	0.0508125	0.271449	-0.22276	0.362949	-0.434763	-0.000879998	-0.0498941	0.465223	0.157519	-0.0260067	0.114957
