# Supplementary material for: Neural pattern change during encoding of a narrative predicts retrospective duration estimates
Source: eLife. 2016 Nov 1;5:e16070. doi: 10.7554/eLife.16070 (PMC5243117; doi:10.7554/eLife.16070)
Supplement: Figure 6—source data 1. — NaNs for a given interval and region indicate that there were not enough participants who rated that interval as confident and who had at least 10 voxels in the specific region to calculate a correlation (this was only an issue for the frontal pole). The bar plots in Figure 6 were generated by plotting the mean Z-value (and standard error of the mean) across intervals for each of the a priori ROIs. The t-values were obtained from a right-tailed t-test on the Z-values for each region. The p-values from this t-test were then subjected to multiple comparisons correction using FDR. DOI: http://dx.doi.org/10.7554/eLife.16070.017 [file elife-16070-fig6-data1.xlsx]

## Sheet: Z-values
	Interval1	Interval2	Interval3	Interval4	Interval5	Interval6	Interval7	Interval8	Interval9	Interval10	Interval11	Interval12	Interval13	Interval14	Interval15	Interval16	Interval17	Interval18	Interval19	Interval20	Interval21	Interval22	Interval23	Interval24	Mean Z-value	t-value
A priori ROIs
Left Lateral orbitofrontal cortex	1.2404	-0.713017	-1.13406	0.444414	2.64548	0.590388	-0.558954	-1.79276	0.614592	-1.64121	0.194814	1.00112	-0.111163	0.486678	1.42055	0.48552	-0.0902895	-1.36311	-1.10672	1.15785	1.01855	2.12405	-0.644215	0.921601	0.216271	0.910545
Right Lateral orbitofrontal cortex	0.140821	-1.4864	-0.151966	-0.0986529	1.51048	1.5319	0.386756	-0.576207	0.99835	-0.594819	0.197432	0.898097	0.401624	1.40323	0.956495	1.30889	1.00623	-0.857636	-0.92582	0.0224322	1.80904	0.933278	-0.0267219	0.586635	0.390561	2.17741
Left Pars orbitalis	1.28198	-1.14435	2.47528	-0.188213	2.46814	2.91645	-0.807257	-0.17046	0.378351	-1.49517	0.884445	-0.0156543	0.0664964	-0.593717	-0.235096	0.00943994	1.53787	0.443292	-2.4771	0.49549	1.84704	2.14258	-0.809225	0.712715	0.405139	1.46639
Right Pars orbitalis	-0.0750572	-0.482532	0.730696	0.707064	0.573508	0.524592	-0.44242	0.839436	0.295303	-0.235763	-0.788271	0.245344	1.02327	0.235824	0.130464	1.18965	2.55321	-0.931764	-0.108324	-0.861764	1.0575	1.63039	0.888137	0.610477	0.387873	2.30691
Left Pars triangularis	0.751696	-1.04325	1.23212	-0.446672	1.35269	-0.162553	0.0600245	-0.17656	-0.992295	-1.2573	0.305516	0.762158	-0.200799	0.414359	-0.206508	0.310784	0.561961	-1.84454	-0.422429	1.90354	-0.954264	-0.280999	-0.880277	0.102005	-0.0463161	-0.255803
Right Pars triangularis	-0.385936	0.244088	-0.299745	0.153123	0.864965	1.06777	-0.422475	-0.699735	1.3727	-0.473742	-0.121466	1.42478	0.637221	0.813891	0.220989	-0.279371	0.191354	-1.77449	-1.36323	0.436196	-0.726518	-0.16713	-1.9255	0.463513	-0.0311984	-0.173174
Left Caudal middle frontal cortex	1.12716	0.243489	2.82318	-0.148958	0.842197	0.388675	0.840527	0.610057	-0.543922	-0.494636	-0.465402	-0.205626	-0.624292	0.0160349	-0.2511	-1.4658	-0.321846	-0.106838	-0.664762	1.08308	-0.122978	1.33189	0.435535	-0.0800039	0.176903	0.989971
Right Caudal middle frontal cortex	1.32312	0.033698	2.14792	0.490975	1.3941	-0.0718906	0.676956	0.549511	-0.946888	-0.165332	-0.41954	-0.32329	-0.207795	0.775665	-0.413179	-1.28903	0.881854	-0.522889	0.622454	0.745995	2.35729	0.937618	0.331704	-0.608933	0.345837	1.86221
Left Rostral middle frontal cortex	0.830077	0.2105	0.517754	-0.183733	2.08669	1.66081	0.423834	0.930112	-0.942881	-0.0183117	0.470087	0.803888	-1.01631	0.166129	0.21276	-1.80032	0.939928	-2.97395	-1.40208	0.785871	0.102457	0.607352	-1.2567	1.45155	0.108563	0.455257
Right Rostral middle frontal cortex	0.986798	-0.0216834	0.534263	-0.0621094	0.578167	0.406047	0.107706	0.194505	0.202799	0.546055	-0.31854	0.762634	1.05618	1.44788	0.535871	-0.00193901	1.03414	-2.17665	-0.829138	0.504214	2.14272	0.395873	-0.629914	0.590662	0.332772	1.95959
Left Superior frontal cortex	1.51972	0.577194	1.51773	-0.258484	1.38268	0.184186	0.196596	0.0576886	0.690917	-0.767729	-0.673774	0.332783	-0.445249	2.07245	-2.05786	-1.40805	0.228286	-0.699606	-0.795415	0.0275452	0.658711	0.746726	-0.486956	0.550955	0.131293	0.663162
Right Superior frontal cortex	0.608209	0.4586	1.2646	-0.30401	1.78875	0.167341	-0.0936592	-0.168576	-0.156179	0.374388	-0.348201	1.01472	-0.400536	0.543957	-1.5234	0.238951	0.846441	-1.94574	-0.763348	-0.350453	1.50303	0.999667	-1.09126	0.365501	0.1262	0.678532
Left Frontal pole	0.887846	-1.43399	-0.594271	NaN	0.856602	NaN	NaN	NaN	NaN	-0.787662	-0.257903	NaN	-0.69421	-0.673709	-0.803022	NaN	NaN	0.649671	0.166731	0.246812	0.112338	0.150661	0.959512	-0.0995097	-0.0821316	-0.462519
Right Frontal pole	0.913378	-0.216422	-0.715906	-0.424249	-0.978145	NaN	0.662757	-0.947213	0.22075	-0.493486	-0.144362	0.272561	-0.072362	-0.277795	0.824467	0.226827	2.05019	-0.381693	-1.68585	-0.736152	1.35828	0.915341	-0.274919	-1.42236	-0.0576679	-0.31004
Left Inferior parietal cortex	0.908591	1.37656	0.330224	0.414185	-0.0942555	0.981327	-0.032922	-0.808968	0.631647	0.230532	-0.448086	0.271357	-1.00976	0.766315	0.701999	-2.02729	0.0901691	-0.433481	-0.243288	0.498306	-0.882849	1.62161	-0.795684	-0.434547	0.0671539	0.392108
Right Inferior parietal cortex	0.602006	1.00202	1.08941	0.745048	1.32465	-0.16633	0.422342	0.65374	-0.494063	0.531748	-1.85641	0.546712	-0.977327	0.49704	0.195493	-0.137646	0.736628	-0.356403	-0.641148	-0.523076	0.630839	0.575552	-0.280538	-1.1427	0.124066	0.775541
Left Parahippocampal cortex	3.34297	-0.613248	0.43985	-0.0689306	1.02498	0.838794	-0.255183	-0.86924	-1.84831	-0.178545	0.800729	0.106579	-0.576389	1.04699	1.16458	0.684537	1.8918	0.974436	-1.82673	0.379456	0.449274	-0.0107121	-1.35264	0.669495	0.258938	1.10053
Right Parahippocampal cortex	2.56148	-0.746092	0.0837798	0.78955	-0.643365	0.360612	-0.179949	-0.0371901	-1.38436	-0.265841	-0.937542	1.51549	-0.447943	2.02977	1.37697	0.42377	-1.3749	0.0646228	-0.469873	0.187339	0.219579	0.948681	0.148592	1.51282	0.239	1.14804
Left Entorhinal cortex	1.17934	1.27126	2.35106	0.527367	-0.302461	0.464864	-0.175695	0.505202	-1.07963	0.204378	0.334939	4.02695	-1.30929	0.110824	-0.469427	1.61858	0.223874	1.11964	-1.14228	0.527367	1.34207	1.52852	-0.312241	1.14066	0.570245	2.36371
Right Entorhinal cortex	1.61672	-0.147684	1.95397	-0.579851	0.894052	0.520948	1.37769	1.04336	1.08003	0.488451	-0.312558	1.30877	-0.154963	0.718754	0.863494	0.357841	0.430549	-0.240126	-0.583424	-0.00194202	1.07356	0.879063	0.898457	-0.223153	0.552584	3.82601
Left Perirhinal cortex	0.571533	-0.193476	0.802537	0.429352	0.342494	2.0643	-0.0228511	-0.792121	-1.14063	-0.484408	-0.0106075	-0.935056	-1.22435	0.40168	0.7711	0.947375	0.38336	-0.247102	-1.53008	0.193111	0.569245	0.984244	-0.80727	2.3359	0.142012	0.723537
Right Perirhinal cortex	2.28985	-0.174497	0.790822	-1.00013	0.771993	0.223913	1.1002	0.646846	-0.383526	-0.0254342	-0.432854	0.00279229	-0.0703305	0.437506	1.22116	1.00904	1.37134	-0.205399	0.421391	-0.122124	0.545242	-0.320606	-1.40504	0.697331	0.307895	1.87305
Left Amygdala	1.30972	-0.392023	-0.127385	-0.111937	1.2236	0.736839	-0.696429	2.07556	-1.05023	1.12283	1.78276	-0.488326	-0.00051443	1.41555	0.439802	-1.32347	0.574361	0.0955574	-0.0441107	-0.520874	0.539807	1.38076	0.910747	0.160914	0.375563	2.03827
Right Amygdala	1.89825	-0.367198	0.978013	0.102546	-0.313518	0.573151	-0.363382	2.41191	0.335817	0.634845	1.54168	0.985905	-1.05358	2.3631	0.871014	0.312817	0.0761961	0.011648	-0.548773	0.0856494	1.05185	0.210654	1.04717	0.00640217	0.535507	2.9511
Left Insula	0.983359	0.893095	0.183813	1.28612	1.09489	0.603826	0.469244	-0.737653	0.481216	-0.322346	-1.83022	1.0239	-0.642847	1.78754	1.60706	1.4168	0.431674	-0.579824	-0.523296	0.124971	0.434523	1.9994	-0.586234	2.58997	0.507874	2.40717
Right Insula	1.17015	1.16898	-0.233716	0.258957	1.15825	0.972775	0.273819	-0.962905	0.678048	0.026557	-0.62732	0.416074	1.36856	2.20626	0.881619	1.54293	0.902122	-1.65293	-0.178311	0.173336	0.777538	0.7046	-0.203135	1.68945	0.521321	2.87462
Left Putamen	2.03525	-0.712941	0.309768	0.00913142	-0.0741298	0.430975	0.603829	-0.970744	-0.275977	-0.0276818	1.43355	-0.0367093	-2.11848	1.5775	0.825879	-0.742489	0.583591	-0.830292	0.109768	-0.728389	-0.0550805	2.45747	-0.656851	-1.27208	0.0781193	0.359219
Right Putamen	0.865428	-0.825625	0.0954162	-1.11161	-0.651601	1.55847	-0.606553	-0.53873	-0.151324	-0.327272	-0.585229	0.0916892	-0.99493	1.43353	0.27481	0.108576	0.0510994	-1.4851	0.0199687	-1.24784	2.13344	-0.127447	0.98248	-0.0409143	-0.0449696	-0.242058
Left Pars opercularis	1.12872	0.377224	0.321749	0.206172	0.60759	0.4912	1.64742	-1.16798	1.92703	-1.08245	0.389764	0.6939	0.414789	-0.094693	0.490489	-1.30684	0.520976	0.256124	0.226355	-0.0122221	-0.193975	1.73102	-0.577409	1.52902	0.355165	2.0259
Right Pars opercularis	0.390572	0.224356	0.630669	0.583938	0.930539	-0.0847235	0.897224	-1.40043	0.0800622	0.856472	-0.0652604	1.01515	-0.00365232	-0.505149	-0.785541	0.155872	0.408316	-2.89818	-1.19331	0.232302	-0.689856	-0.965409	-1.982	0.673402	-0.14561	-0.719988
Left Hippocampus	2.21802	-1.18285	1.7813	0.329426	0.729014	0.859168	-0.765196	-0.14898	-0.878476	0.882472	1.30209	0.263204	-1.31838	0.937564	0.495317	0.675838	1.49188	0.0627929	-0.446262	-0.219295	-0.245769	0.624777	0.8684	-0.174003	0.339252	1.82561
Right Hippocampus	1.85901	-0.51725	0.139807	-0.268783	-0.0431721	0.608608	-0.342146	0.430841	0.048641	0.996221	1.72624	0.398728	-1.96306	0.494315	1.36163	2.13864	-1.26271	-0.227966	-0.216545	0.385225	-0.56161	0.915828	0.58732	-0.652584	0.251468	1.2772
-
Other Regions
Left Precuneus	0.567919	1.24759	0.181353	-1.17411	0.632701	-0.00299959	-0.499661	-0.578332	0.113491	0.534427	-0.652327	-0.21911	-0.919258	0.638816	-0.525191	-1.63625	-0.225995	-0.991635	-0.0682989	-0.532683	0.0487876	1.94684	-0.787647	0.517454	-0.0993384	-0.602218
Right Precuneus	0.767649	0.104151	-1.42086	-0.424089	0.29395	-0.610421	0.362619	-0.0158775	-0.782903	-1.3033	-0.0619851	0.124904	-0.12104	0.953996	-0.783147	-0.894957	-0.304418	-1.6409	-0.13499	-0.461978	-0.325161	1.02379	-0.755208	0.688233	-0.238415	-1.62309
Left Isthmus of the cingulate	1.26924	-0.933887	-0.537813	-1.05803	0.0780611	0.764614	2.21929	-0.961366	-0.908598	0.203409	-0.941269	0.414461	-0.417081	0.136268	0.831256	-0.944392	-1.09443	-0.584206	0.217287	-1.14187	-0.294479	2.36793	-0.397833	-0.60954	-0.0967907	-0.474992
Right Isthmus of the cingulate	0.626092	0.217569	-1.21319	-0.479857	-0.575635	0.796769	1.11613	0.0298271	-0.498645	-0.0108329	-0.455719	-0.84995	0.16032	0.871684	1.61135	-1.6057	0.113877	-0.229931	-0.570343	-0.674285	0.240361	2.55003	-0.923522	-2.01624	-0.0737434	-0.355988
Left Posterior cingulate cortex	-0.437282	1.87181	0.669841	0.470008	-1.0605	-0.0823808	1.43329	0.386683	-0.388045	1.35651	-0.202481	-0.045293	-0.39669	0.289472	0.367306	-1.8508	1.89603	-0.635637	1.29691	-0.219757	-1.96549	1.21693	-1.29396	-0.120148	0.106513	0.490546
Right Posterior cingulate cortex	0.353912	0.808213	1.3494	0.172615	-1.68559	-0.956156	2.16846	0.0531857	-1.83415	0.394152	-0.54296	0.749621	-0.244331	1.34966	-0.737497	0.234502	1.09523	-1.44008	0.0514452	0.146045	-0.141378	1.76725	-0.471487	-0.111495	0.105357	0.501581
Left Caudate	-0.498915	-0.76747	0.791516	0.57506	0.306304	0.206875	0.557381	-0.644386	-0.425733	0.389327	1.04488	0.229213	-0.858768	1.89701	-0.578871	0.129125	1.18947	-0.595366	-0.817402	0.976362	0.116909	1.47121	1.24073	-1.81157	0.171787	0.938256
Right Caudate	-0.615407	0.69904	0.480614	-0.835009	0.758233	1.18874	0.162508	-0.881296	0.453156	-0.817976	1.10728	0.205503	-0.651744	0.90705	0.658042	-0.273258	0.685104	-0.899253	0.785338	-0.0589071	1.16161	0.956348	0.0938131	-2.66687	0.108444	0.577191
Left Pallidum	0.606053	0.0145724	1.01921	-0.216916	-0.793666	0.0787155	-0.142111	-1.61278	-0.207221	-0.512765	0.513886	0.979986	-0.91107	-0.162537	-1.12543	-0.0745035	0.675658	-1.36618	-0.761195	0.0535379	1.63368	0.810335	-1.52225	-0.449868	-0.144702	-0.833991
Right Pallidum	0.508647	-2.32964	1.30765	-0.395914	0.170211	-0.111416	-0.455243	-1.80512	0.886723	0.0502244	0.323489	0.0765872	-0.00855517	1.07251	0.471458	-0.468652	0.124797	-2.3435	0.209053	0.0145802	1.79318	0.361785	-0.433219	1.10347	0.00512932	0.0246746
Left Medial orbitofrontal cortex	0.975279	-1.24646	0.0396735	0.0251571	2.31618	1.10923	-0.145226	-0.530115	1.05056	-1.50927	0.937419	0.35472	0.11631	1.75401	-0.502194	-0.127419	0.942635	-0.409175	-1.31367	1.5948	0.982969	1.09984	-0.0509837	0.691763	0.339836	1.68853
Right Medial orbitofrontal cortex	0.232699	-1.86966	-0.190124	-0.929253	1.05053	0.0505803	0.15065	-0.693587	1.64941	-1.19301	-0.468477	-1.70042	0.847449	0.816418	1.09093	-0.79228	2.03781	-1.66475	-1.73358	0.720707	1.46988	2.62639	-0.50943	0.070226	0.0445452	0.173849
Left Caudal anterior cingulate cortex	1.47249	1.93835	1.49495	0.943941	0.280174	0.375382	0.674676	0.420982	0.660702	-0.972971	-1.857	0.386102	-0.0350493	1.0738	-1.16246	0.942665	0.0486435	-0.674928	1.49325	-0.293197	0.65382	1.52282	0.851004	1.10297	0.472546	2.45931
Right Caudal anterior cingulate cortex	0.38096	1.80373	1.8124	0.12094	0.983556	1.36823	-0.0488605	-0.989407	0.470225	0.703782	-1.08052	-0.566428	-1.1557	2.13831	-0.111395	0.83522	-0.541744	-0.404831	-0.333402	0.122999	0.892531	0.0162272	-0.313888	0.276767	0.265821	1.42526
Left Rostral anterior cingulate cortex	0.862013	-1.69495	0.751355	0.35692	-0.198618	0.633991	-0.0200177	0.554141	-0.842772	-0.230515	0.402684	0.20948	-0.183954	1.75923	-1.39713	-0.814201	1.63518	-1.15379	-0.498183	1.16182	0.0960124	2.54715	0.483014	0.531867	0.20628	1.00264
Right Rostral anterior cingulate cortex	0.224663	-0.730564	0.592553	-0.120768	-0.349409	0.460802	-0.314977	-1.51186	0.848598	-1.14009	0.21103	0.159299	0.270972	0.257152	0.179589	0.140067	1.27241	-1.3496	0.553427	0.988444	0.888133	0.646511	-0.564047	0.3119	0.0801765	0.54059
Left Paracentral cortex	1.52182	0.0485309	-0.939639	0.709822	0.841915	0.168577	0.401605	-1.69725	1.05384	1.11064	-0.366457	-0.22264	-0.426314	0.869884	0.510837	0.539791	0.664457	0.327151	-1.88501	-0.162737	0.386925	1.38829	-0.962192	-0.811251	0.127941	0.691443
Right Paracentral cortex	3.43456	-0.55155	-0.40337	-0.117013	-1.33421	0.695914	0.335413	-1.82873	0.474686	0.147499	-0.960775	0.0733775	1.04773	0.406266	0.844272	1.134	-0.201318	1.58928	-0.815942	-0.0735339	1.37082	1.31008	0.0736043	0.64448	0.303981	1.36263
Left Precentral gyrus	1.66954	0.486436	-0.177846	-0.0680809	1.8632	1.15098	1.19327	-1.88237	-1.14752	0.965775	-0.277177	-0.886658	-0.164172	1.63556	-0.942322	-0.407736	-0.238851	1.42461	-0.905335	-1.66448	0.129946	0.206185	-1.04427	1.76539	0.111836	0.485126
Right Precentral gyrus	1.08644	0.365021	-0.376715	-0.265412	0.58824	0.465888	0.0645862	0.00320272	-0.0383003	0.832431	-0.872155	0.384143	0.263172	1.0561	-1.17281	-0.0333646	0.127642	1.13881	-0.820707	-1.04004	0.150969	0.638287	-0.925718	0.983084	0.10845	0.75809
Left Postcentral gyrus	1.73077	2.00802	-0.973933	-0.045026	1.73201	0.519256	0.34598	-1.51933	0.748298	-0.726229	0.408678	-0.0425913	0.343049	1.17608	-0.0231842	-0.028685	0.163724	1.50259	-1.40365	-1.70493	0.209148	-0.133621	0.0973253	1.14092	0.230195	1.11101
Right Postcentral gyrus	0.688299	0.49672	0.16555	-0.550098	0.607509	0.70368	-0.113421	-0.109506	-0.633255	0.295974	-0.123571	-0.058995	0.00333989	-0.031563	-1.89659	0.663704	-0.451332	1.12386	-2.10944	-1.25963	0.663141	1.50128	-0.884083	0.910256	-0.0165901	-0.0911508
Left Superior parietal cortex	1.15362	0.0173576	0.0027797	0.12456	-0.567095	0.727808	0.0970038	0.266332	-0.784991	-0.024302	1.01018	-0.652886	-0.129592	0.45546	0.0099868	-2.14605	0.587585	0.753003	0.624809	-2.88106	-0.00581732	1.60279	-1.43221	0.297555	-0.0372156	-0.18056
Right Superior parietal cortex	0.747242	-0.699001	-0.775683	-0.408581	0.103693	0.515033	0.616053	0.702887	-0.452884	0.0512783	0.0865989	0.0250692	-0.069487	2.52154	0.241207	-0.919764	0.0571347	0.931057	-0.580019	-2.11997	1.16891	1.83145	-1.30975	-0.306611	0.0815583	0.403793
Left Supramarginal gyrus	1.74144	1.18942	-0.0178509	-0.4721	0.655985	1.07094	1.64922	-0.0502527	0.169723	-0.442245	0.588169	-0.237482	0.331517	-0.72111	-1.53492	-0.608581	0.891504	0.646029	-1.4246	0.306503	-0.787455	2.01471	-0.693766	-0.0789162	0.174412	0.900108
Right Supramarginal gyrus	0.970908	0.967076	0.349944	0.349211	0.783587	0.662379	1.62644	-1.09177	-0.00757694	0.558278	-0.25885	0.75289	-0.230416	0.138597	-0.409221	0.468366	1.49599	0.0172971	-1.88798	-0.301285	0.357262	1.09587	-1.47315	-1.09798	0.159828	0.875369
Left Superior temporal cortex	1.47079	0.603008	0.272463	-0.818039	1.42673	1.40799	1.90464	0.500472	-1.09586	-0.173188	1.7116	-0.0422082	-0.804588	0.961717	0.45397	-1.8454	-0.516515	-0.461321	-0.516944	0.308177	1.13463	1.65081	-0.794138	0.616959	0.30649	1.4661
Right Superior temporal cortex	1.33877	1.58076	0.82982	-0.49041	3.35467	0.74645	1.10338	1.02922	-0.0792627	-0.00416694	0.30961	-0.0148312	0.738336	1.05954	0.5199	-0.577216	0.627441	-1.15191	-0.431192	0.746191	0.922559	1.48186	-2.05131	0.774304	0.515105	2.39045
Left Banks of the Superior temporal sulcus	0.662268	1.48645	-0.919542	0.0173355	0.829423	0.527604	0.675066	-0.761546	0.0175333	0.540865	0.38169	1.96029	-0.571944	0.108278	-0.227705	-1.3549	1.74277	1.09268	0.101656	-0.601487	-0.431663	3.57921	-1.17709	-0.202925	0.31143	1.36573
Right Banks of the Superior temporal sulcus	2.04527	0.546649	-0.976027	-1.89278	0.20748	0.451566	0.15828	1.37159	0.440601	-0.401033	0.718263	0.66408	-0.168556	0.445669	1.47044	-1.27565	1.20631	2.37743	-0.123564	0.200846	-0.464168	0.568513	-2.25449	0.00488074	0.221734	0.982705
Left Transverse temporal cortex	1.65859	2.6402	0.430416	0.978078	-1.97227	1.13449	1.29575	0.731258	0.153316	0.279657	-0.123167	0.147743	-0.932628	-0.211619	1.96419	-1.26545	-0.352177	-1.35132	-0.669124	0.244708	1.54568	0.838158	-0.940837	0.271619	0.270636	1.17035
Right Transverse temporal cortex	1.07249	1.21126	-0.463525	0.675032	1.12644	-0.135249	-0.19958	-0.754148	0.169935	-0.433522	0.613858	-0.661194	-0.0870904	0.129012	1.13321	-0.141887	-0.503137	0.110188	-1.20246	0.712937	0.397195	0.848784	0.0312575	-0.58784	0.127582	0.920825
Left Middle temporal cortex	0.486482	-0.0373111	0.79745	-0.531968	1.45828	2.258	0.0624994	-0.259977	0.00188529	0.467977	1.11462	0.229473	-1.07602	0.206478	0.144123	-0.976041	0.354517	0.351141	-2.58693	-0.785193	-0.294483	1.03156	0.572128	0.164118	0.131367	0.676905
Right Middle temporal cortex	0.00370734	0.930025	-0.258705	-0.736685	1.01172	1.09355	1.15493	0.46517	0.35556	0.194135	1.25146	0.138248	0.74302	0.751599	-0.309827	0.277338	0.349592	-0.53387	0.0197314	-0.2138	0.921396	-0.349966	-0.559216	-2.21489	0.186843	1.16952
Left Inferior temporal cortex	1.04896	-0.130387	0.509792	0.272548	1.24228	4.09871	-0.293678	0.846189	0.145825	0.103404	0.968616	0.226165	-1.44724	1.12399	-0.208632	0.3612	0.180939	-1.60424	-0.75381	-0.377318	-0.936267	1.61079	-0.179312	-0.0653613	0.280965	1.20361
Right Inferior temporal cortex	0.490831	0.406777	0.472253	0.120114	1.03238	0.531705	0.10918	0.826386	-0.398681	0.086083	0.0704811	-0.0654583	1.0658	0.756449	0.81702	0.940615	0.383745	-0.686483	1.16333	-0.0793187	0.0307669	0.264081	-0.601269	-0.55322	0.299315	2.71896
Left Lingual gyrus	1.00556	-0.556976	-0.813848	1.64078	0.67464	0.806136	1.98903	2.81254	-0.536464	-1.35361	1.81437	0.67536	-1.45765	0.371979	-0.0608651	0.531899	0.499931	-1.34702	-1.03665	-2.05794	-0.0531921	1.62757	-0.644869	-0.255341	0.178141	0.699401
Right Lingual gyrus	1.03371	0.0350047	-0.317807	1.39138	0.380805	0.215795	1.28077	0.908755	-1.11809	-1.19106	0.28521	0.0286298	-0.319346	0.323317	-0.901807	-0.454685	0.707249	0.893547	-0.0481084	-1.15618	0.0150007	1.97482	-0.446074	0.0874189	0.150344	0.884621
Left Lateral occipital cortex	0.419456	-0.528519	-1.09084	-0.12186	0.948822	1.23988	1.27172	2.2939	-0.180763	-0.808763	0.227653	0.490813	0.120518	0.498801	1.02037	-1.709	0.159567	-0.459745	0.220971	-2.17443	-0.903885	1.14777	-0.324869	-0.661558	0.0456668	0.219823
Right Lateral occipital cortex	0.84709	-0.45188	-1.10916	-0.218799	1.47615	0.832898	0.654332	0.598662	-0.0851801	1.42219	-0.497095	0.25877	0.151124	-0.431877	0.761462	1.04551	0.198627	0.016437	-0.277816	-2.19338	-0.663045	1.16675	0.564517	-0.777546	0.137031	0.774339
Left Pericalcarine cortex	0.780865	-0.170691	-0.370611	0.387022	0.8028	1.2109	1.89392	1.9016	-0.445111	-0.116672	0.762932	-0.238256	-2.12231	-0.540567	-0.635207	-0.698045	0.357879	-0.781061	-0.807245	-1.73194	-2.45192	0.423787	0.199681	0.770599	-0.0674025	-0.299899
Right Pericalcarine cortex	0.916501	-0.875897	0.601549	-1.41046	0.181839	0.224051	1.5235	0.646962	-0.533855	-0.646528	1.14073	-0.00625502	-0.0305038	-0.275288	-0.283791	-0.10833	0.183538	-0.186692	-0.516532	-1.33855	-1.21422	0.387298	1.32716	-0.767708	-0.0442284	-0.268215
Left Cuneus	-0.644996	-1.29364	0.189433	-0.535529	0.796647	0.402369	0.197547	1.31154	0.43141	1.60639	-0.15993	0.717736	-2.34766	0.392919	-0.905745	0.920897	-1.0361	1.08496	1.45125	-1.7016	-0.0553395	1.53388	0.354559	-0.47629	0.0931133	0.434399
Right Cuneus	0.418349	-0.812098	-0.495626	-0.84967	0.53617	-0.167816	0.847753	0.424539	0.0378589	0.11698	-1.39952	-0.677708	-0.342815	0.503855	-1.16543	0.110901	-0.217687	-0.407119	0.192437	-0.776898	-0.324111	1.78112	0.297675	-0.701452	-0.12793	-0.885912
Left Fusiform gyrus	1.95173	-0.663447	0.473405	-0.0728627	0.894221	1.44349	-0.0330173	0.00843838	-0.326998	-1.41692	-0.451814	-0.599661	-1.46907	0.701916	0.85634	-0.42386	0.0180787	-0.323368	-0.983421	-0.454138	-0.132652	1.7817	-1.24965	0.351444	-0.00500502	-0.0264533
Right Fusiform gyrus	2.75696	-0.301088	0.903885	-0.576209	0.393698	0.545713	0.133968	0.362539	-0.27264	-0.783462	-1.67951	-0.254318	-0.640718	0.518999	1.47076	0.681158	1.23871	0.0671042	-0.340038	0.310851	-0.197597	1.0949	-0.0653698	0.203821	0.232172	1.28342
Left Thalamus proper	2.35535	0.640662	-0.692156	-0.868534	0.195048	1.03331	-0.922792	-0.507661	-0.411047	0.706791	0.469373	0.823851	-1.15988	2.00084	0.220339	-0.660709	0.205115	-0.0152066	-0.369429	-0.797779	0.742286	-0.0323799	-1.30757	0.416115	0.0859978	0.45315
Right Thalamus proper	0.445284	-0.357367	0.927061	0.11839	0.54686	0.307027	0.0153624	0.107371	-0.314958	-0.672664	0.21488	0.113583	-0.884126	2.40244	1.30828	-1.8686	0.401103	-0.763603	-0.147243	0.658915	1.52032	2.4358	-1.778	1.42329	0.256642	1.15994
Brainstem	2.53195	-0.0122545	1.27432	0.660988	-1.08291	1.29042	-1.12649	-0.467191	-0.191291	-0.835952	0.137826	0.0725363	-0.508474	2.05577	0.19213	-0.480879	2.04195	-0.127898	-0.0025585	-0.459554	0.13384	1.4562	-0.130664	-1.03598	0.224409	1.0603
Left Temporal pole	0.731084	-0.132662	0.675682	0.886155	1.38532	3.11324	0.258255	0.166075	-0.67019	-1.17525	0.92767	-0.960416	-1.23211	0.449805	0.713497	-0.229698	-0.594821	-1.22852	-2.57108	0.757739	0.218664	2.52113	0.347701	-0.447631	0.162901	0.65131
Right Temporal pole	1.4636	-1.1245	-0.75574	1.09147	-1.81451	0.581854	1.12574	-1.1954	-0.91265	-1.31674	-0.417526	-0.205835	1.69615	0.963319	1.69435	1.31667	0.601428	0.181907	2.08568	0.513399	0.139143	0.605129	-0.959792	-1.9988	0.139931	0.576426

## Sheet: Fisher-transformed Pearson's R
	Interval1	Interval2	Interval3	Interval4	Interval5	Interval6	Interval7	Interval8	Interval9	Interval10	Interval11	Interval12	Interval13	Interval14	Interval15	Interval16	Interval17	Interval18	Interval19	Interval20	Interval21	Interval22	Interval23	Interval24	Mean Fisher-transformed Pearson's r
A priori ROIs
Left Lateral orbitofrontal cortex	0.468753	-0.29605	-0.573913	0.226291	1.7769	0.625221	-0.299809	-1.21628	0.307276	-0.617978	0.102999	0.482131	-0.0395836	0.148321	0.431049	0.179392	-0.0356273	-0.425662	-0.367858	0.333854	0.340157	0.593611	-0.187403	0.255572	0.0921404
Right Lateral orbitofrontal cortex	0.048194	-0.583743	-0.0749603	-0.045269	1.05756	1.34967	0.188445	-0.373292	0.494356	-0.218257	0.0950267	0.427412	0.155957	0.433375	0.286075	0.485023	0.380318	-0.272513	-0.306042	0.00824013	0.601668	0.256044	-0.00993059	0.160561	0.18933
Left Pars orbitalis	0.480919	-0.518621	1.36045	-0.0878565	1.6804	2.58949	-0.472655	-0.0868523	0.223861	-0.56036	0.439758	-0.00126075	0.0279325	-0.205864	-0.0722597	-0.00195445	0.575033	0.14348	-0.825547	0.155299	0.656476	0.630145	-0.24527	0.205206	0.253748
Right Pars orbitalis	-0.0325944	-0.193212	0.346839	0.363173	0.400275	0.560388	-0.218066	0.584164	0.144951	-0.0758964	-0.394934	0.124384	0.382005	0.0850706	0.0375694	0.438538	0.947507	-0.290246	-0.0329582	-0.246824	0.347162	0.455534	0.259108	0.16684	0.173282
Left Pars triangularis	0.275921	-0.419652	0.592893	-0.21408	0.945338	-0.150744	0.0142047	-0.0932604	-0.484426	-0.466324	0.151787	0.367002	-0.0789399	0.132827	-0.0648677	0.110867	0.209146	-0.579483	-0.14364	0.549861	-0.317746	-0.0757222	-0.25068	0.0281295	0.00160046
Right Pars triangularis	-0.146104	0.100283	-0.203443	0.0800942	0.604211	0.986891	-0.226706	-0.467372	0.682561	-0.178359	-0.0603881	0.697571	0.24151	0.253833	0.0675321	-0.109524	0.0759282	-0.554818	-0.44874	0.131481	-0.240968	-0.0466903	-0.557499	0.129102	0.0337661
Left Caudal middle frontal cortex	0.423476	0.10573	1.38819	-0.0701815	0.579109	0.396441	0.407237	0.404014	-0.27087	-0.180268	-0.237605	-0.0954127	-0.237985	0.00434021	-0.0799976	-0.555818	-0.117807	-0.0330727	-0.218425	0.307027	-0.0360847	0.371581	0.126558	-0.0213904	0.0982829
Right Caudal middle frontal cortex	0.495685	0.0114298	1.04848	0.246191	0.969965	-0.0716352	0.327914	0.375696	-0.486173	-0.0603282	-0.215261	-0.156073	-0.0818574	0.241523	-0.126784	-0.48247	0.328225	-0.16393	0.205631	0.216253	0.782382	0.26376	0.0938594	-0.162735	0.149989
Left Rostral middle frontal cortex	0.307292	0.0924073	0.246252	-0.0863808	1.40139	1.51513	0.200244	0.608963	-0.47569	-0.00150495	0.230695	0.387181	-0.393827	0.048392	0.0568731	-0.670419	0.35862	-0.942271	-0.46472	0.22905	0.036866	0.171567	-0.354426	0.402922	0.121025
Right Rostral middle frontal cortex	0.37394	-0.0157305	0.244509	-0.0237026	0.388829	0.427708	0.0301074	0.141211	0.103866	0.211579	-0.160363	0.367476	0.398985	0.454788	0.154543	-0.00544194	0.387033	-0.693547	-0.283369	0.146622	0.712376	0.112468	-0.181161	0.164058	0.144033
Left Superior frontal cortex	0.563614	0.226419	0.733241	-0.123598	0.945323	0.214484	0.0816423	0.064322	0.322774	-0.282875	-0.337446	0.171066	-0.168825	0.647892	-0.625865	-0.525631	0.0849102	-0.220137	-0.260099	0.00774559	0.219476	0.206461	-0.137548	0.152611	0.0816649
Right Superior frontal cortex	0.224025	0.181478	0.603828	-0.146256	1.21855	0.149092	-0.0640957	-0.0806233	-0.0954537	0.143283	-0.176961	0.498794	-0.15333	0.168934	-0.464005	0.0868929	0.316303	-0.61265	-0.253359	-0.0996982	0.498799	0.27822	-0.313295	0.104696	0.0838821
Left Frontal pole	1.40986	-2.25712	-0.805035	NaN	1.28405	NaN	NaN	NaN	NaN	-0.68318	-0.404638	NaN	-0.495727	-0.539532	-0.543913	NaN	NaN	0.901107	0.0972106	0.354194	0.174382	0.145063	1.42042	-0.0635366	-0.000399519
Right Frontal pole	0.515291	-0.124664	-0.489058	-0.396729	-1.61178	NaN	0.520933	-1.45432	0.31208	-0.233275	-0.0856245	0.174393	-0.0307962	-0.12635	0.303962	0.174208	1.1711	-0.154938	-0.744214	-0.298174	0.766511	0.35469	-0.105224	-0.534978	-0.0911723
Left Inferior parietal cortex	0.341695	0.568049	0.15012	0.202812	-0.0552136	0.876183	-0.0277669	-0.539351	0.2988	0.0872797	-0.228826	0.133826	-0.377769	0.230986	0.217111	-0.756992	0.0393418	-0.13686	-0.0839133	0.147462	-0.285835	0.456687	-0.228203	-0.116354	0.0380528
Right Inferior parietal cortex	0.227841	0.414301	0.533118	0.36851	0.918738	-0.144711	0.207931	0.429257	-0.250014	0.207613	-0.937818	0.25473	-0.370831	0.14824	0.0552509	-0.0561853	0.273363	-0.114082	-0.212304	-0.155094	0.21058	0.167086	-0.0799975	-0.312207	0.0743049
Left Parahippocampal cortex	1.25068	-0.257253	0.214284	-0.0277406	0.713054	0.837809	-0.129438	-0.604593	-0.922167	-0.0609847	0.396099	0.0593187	-0.217363	0.320167	0.356193	0.252725	0.72384	0.305311	-0.605603	0.109637	0.156785	-0.00112402	-0.396043	0.181396	0.110624
Right Parahippocampal cortex	0.957112	-0.309771	0.0265235	0.38639	-0.441958	0.404803	-0.0954261	-0.00674546	-0.679694	-0.0964114	-0.465169	0.748478	-0.168186	0.630757	0.418026	0.15563	-0.515967	0.0193792	-0.166065	0.0527583	0.0780211	0.266081	0.0420558	0.416806	0.0690594
Left Entorhinal cortex	0.441999	0.501158	1.13832	0.265906	-0.213442	0.507169	-0.0942048	0.336127	-0.534179	0.0771019	0.175507	1.98286	-0.485547	0.0429886	-0.139126	0.603643	0.0760038	0.350947	-0.381643	0.153714	0.446924	0.434152	-0.0931939	0.322413	0.246483
Right Entorhinal cortex	0.614146	-0.0505485	0.961841	-0.292926	0.623837	0.42027	0.675245	0.693368	0.526618	0.187679	-0.160776	0.630492	-0.0524926	0.225928	0.261051	0.132889	0.15831	-0.077645	-0.186653	-0.00176389	0.354123	0.24265	0.255144	-0.0570833	0.253488
Left Perirhinal cortex	0.214096	-0.0843526	0.399296	0.214937	0.232849	1.86854	-0.0236501	-0.535688	-0.572133	-0.172334	-0.00595852	-0.470383	-0.454977	0.119597	0.230512	0.352978	0.143386	-0.0787323	-0.51077	0.0576978	0.19277	0.280865	-0.237133	0.652897	0.0755963
Right Perirhinal cortex	0.861005	-0.0811961	0.369225	-0.515158	0.499997	0.270522	0.554077	0.425508	-0.211668	-0.00165262	-0.221607	0.00229674	-0.0246318	0.140586	0.368777	0.377778	0.51568	-0.0669487	0.150027	-0.0350474	0.17712	-0.0882605	-0.405731	0.191243	0.135498
Left Amygdala	0.495435	-0.166275	-0.0638254	-0.0563736	0.834938	0.749618	-0.333411	1.42285	-0.518973	0.419252	0.878002	-0.230248	0.00514963	0.446909	0.134244	-0.491578	0.211609	0.0321193	-0.00840365	-0.144861	0.174658	0.387887	0.26162	0.0455242	0.186911
Right Amygdala	0.714073	-0.160532	0.473218	0.050043	-0.242168	0.610678	-0.171064	1.6876	0.158519	0.239661	0.776544	0.468109	-0.395652	0.735286	0.265074	0.118693	0.0205934	0.00371613	-0.176655	0.0295725	0.351488	0.0592794	0.296624	0.00118489	0.246412
Left Insula	0.368606	0.368143	0.089798	0.650723	0.715845	0.639321	0.235771	-0.504224	0.220909	-0.114644	-0.921453	0.479513	-0.246227	0.560562	0.499757	0.529615	0.173479	-0.183733	-0.182889	0.041108	0.136163	0.561649	-0.165464	0.724876	0.194884
Right Insula	0.438349	0.471545	-0.115549	0.131308	0.815101	0.919534	0.128366	-0.642177	0.325127	0.0179294	-0.313662	0.199313	0.51509	0.693019	0.264379	0.583964	0.342415	-0.515607	-0.0660083	0.0521444	0.263338	0.198613	-0.0579104	0.472491	0.21338
Left Putamen	0.760834	-0.288007	0.132778	0.00788142	-0.0513975	0.329479	0.29053	-0.655055	-0.135233	-0.00820854	0.712614	-0.0098648	-0.797944	0.491754	0.248752	-0.27769	0.218386	-0.26088	0.0305055	-0.206233	-0.0212963	0.685935	-0.195863	-0.345442	0.0273473
Right Putamen	0.325166	-0.335722	0.0458132	-0.543985	-0.466775	1.43501	-0.310748	-0.351503	-0.0934412	-0.122558	-0.287028	0.0424812	-0.371391	0.441954	0.0784502	0.0434835	0.0218287	-0.469538	0.00434821	-0.360843	0.715499	-0.0336908	0.280178	-0.0157903	-0.0137002
Left Pars opercularis	0.425332	0.15051	0.152563	0.103726	0.41055	0.531442	0.805735	-0.800115	0.952709	-0.398695	0.186519	0.336325	0.149855	-0.0335266	0.143677	-0.484458	0.204491	0.076385	0.0678323	-0.00386261	-0.0585581	0.48605	-0.162579	0.424677	0.152774
Right Pars opercularis	0.144747	0.091257	0.295821	0.292285	0.651556	-0.0574448	0.42769	-0.950728	0.0391006	0.321729	-0.0322429	0.496526	0.00061801	-0.156883	-0.240315	0.056716	0.151773	-0.913332	-0.396863	0.0730151	-0.225793	-0.272032	-0.569977	0.18755	-0.0243844
Left Hippocampus	0.826141	-0.494257	0.913599	0.161501	0.507453	0.81922	-0.397521	-0.0803919	-0.437217	0.334925	0.644293	0.125987	-0.488879	0.290464	0.152094	0.257696	0.56637	0.021182	-0.147493	-0.0619511	-0.0786302	0.176409	0.24803	-0.0457	0.158888
Right Hippocampus	0.698968	-0.211053	0.108813	-0.137749	-0.0621276	0.642757	-0.174928	0.300802	0.0206277	0.38062	0.852453	0.19574	-0.728766	0.166191	0.413017	0.79705	-0.474684	-0.0709831	-0.0685713	0.11209	-0.184196	0.254656	0.169556	-0.181686	0.117442
-
Other Regions
Left Precuneus	0.219205	0.501207	0.0978942	-0.603924	0.430625	0.0250207	-0.242916	-0.441329	0.0406402	0.197603	-0.319026	-0.0998308	-0.347823	0.191427	-0.152151	-0.604445	-0.0867457	-0.310249	-0.0224599	-0.151292	0.0197808	0.550579	-0.226223	0.147306	-0.0494636
Right Precuneus	0.292816	0.0446398	-0.791439	-0.21685	0.193978	-0.652972	0.186569	-0.0225591	-0.388511	-0.495313	-0.0316399	0.0620796	-0.047172	0.294701	-0.230247	-0.334816	-0.120135	-0.516213	-0.0489936	-0.129726	-0.106076	0.288945	-0.216675	0.193776	-0.116326
Left Isthmus of the cingulate	0.475452	-0.382545	-0.267931	-0.515873	0.0578735	0.776443	1.11929	-0.643544	-0.452925	0.0963411	-0.47241	0.195134	-0.14955	0.0359522	0.256623	-0.353901	-0.409503	-0.189578	0.0600251	-0.325452	-0.0998978	0.662285	-0.116543	-0.168945	-0.0338824
Right Isthmus of the cingulate	0.242412	0.0874549	-0.644124	-0.236966	-0.397284	0.757452	0.555027	0.0525133	-0.261729	-0.0141856	-0.224005	-0.419915	0.0670918	0.259199	0.486897	-0.603901	0.036692	-0.0716414	-0.194282	-0.188907	0.0786298	0.715	-0.270118	-0.552128	-0.0308673
Left Posterior cingulate cortex	-0.167754	0.756222	0.336061	0.222117	-0.737967	-0.0731795	0.719305	0.244145	-0.21324	0.512078	-0.0926351	-0.0325746	-0.153381	0.0918952	0.113927	-0.683424	0.705467	-0.198035	0.425552	-0.0629502	-0.659882	0.342674	-0.371117	-0.0342551	0.0412102
Right Posterior cingulate cortex	0.136129	0.330973	0.666958	0.0854046	-1.14066	-0.966656	1.06749	-0.000552973	-0.933913	0.147311	-0.277012	0.352794	-0.0991169	0.42388	-0.219535	0.0829394	0.406754	-0.44862	0.0114183	0.0424429	-0.0507137	0.488398	-0.133157	-0.030566	-0.00240029
Left Caudate	-0.190469	-0.311694	0.378953	0.283627	0.184435	0.230561	0.269112	-0.433362	-0.210105	0.151444	0.511388	0.113693	-0.325253	0.595955	-0.176932	0.0535537	0.44777	-0.191581	-0.261005	0.280414	0.0396863	0.417479	0.357691	-0.497832	0.0715637
Right Caudate	-0.232425	0.290341	0.223883	-0.413109	0.50724	1.12432	0.0631773	-0.6042	0.22317	-0.302259	0.555373	0.10879	-0.253786	0.291158	0.195393	-0.10591	0.258675	-0.285522	0.261504	-0.0178278	0.389645	0.270385	0.0243405	-0.73776	0.0764418
Left Pallidum	0.230907	0.0109646	0.501608	-0.101939	-0.556552	0.068226	-0.0660722	-1.07677	-0.108623	-0.206488	0.26042	0.468598	-0.34545	-0.0387199	-0.330882	-0.026332	0.244686	-0.432521	-0.247342	0.0186711	0.54071	0.228031	-0.445028	-0.122727	-0.0638594
Right Pallidum	0.192948	-0.935068	0.639087	-0.205182	0.129999	-0.102273	-0.223159	-1.2744	0.417442	0.0285401	0.148326	0.0397545	-0.0018658	0.329657	0.141131	-0.174426	0.0407705	-0.736776	0.0804846	0.00717996	0.590234	0.100019	-0.127923	0.309571	-0.0244139
Left Medial orbitofrontal cortex	0.359405	-0.508312	-0.00272789	0.0155436	1.61268	1.11733	-0.0856846	-0.359278	0.511784	-0.564525	0.473305	0.184077	0.046337	0.544599	-0.152517	-0.0554387	0.345144	-0.129527	-0.437764	0.463315	0.320321	0.309694	-0.0155883	0.190431	0.174275
Right Medial orbitofrontal cortex	0.0855276	-0.757656	-0.113104	-0.457563	0.707932	0.0525611	0.0592126	-0.452585	0.814916	-0.444584	-0.228499	-0.830472	0.319882	0.253229	0.328841	-0.303268	0.774708	-0.52685	-0.582772	0.207097	0.48663	0.734244	-0.146729	0.0182119	-4.54475e-05
Left Caudal anterior cingulate cortex	0.546684	0.777429	0.733305	0.47702	0.188903	0.417003	0.340664	0.287925	0.314069	-0.358606	-0.92271	0.181796	-0.0136395	0.346186	-0.349035	0.364786	0.0169441	-0.216235	0.494515	-0.0838045	0.212788	0.425602	0.244286	0.30323	0.197046
Right Caudal anterior cingulate cortex	0.138168	0.730947	0.895177	0.068631	0.699758	1.19512	-0.0282076	-0.652865	0.218415	0.272135	-0.542342	-0.28089	-0.430603	0.673403	-0.0278131	0.324915	-0.204366	-0.128337	-0.107773	0.0379335	0.295945	0.00526808	-0.088284	0.0760453	0.130849
Left Rostral anterior cingulate cortex	0.319718	-0.696285	0.366883	0.178838	-0.150418	0.52344	-0.0283458	0.363084	-0.404442	-0.0800337	0.194796	0.102698	-0.0722127	0.56104	-0.418553	-0.308544	0.605686	-0.368423	-0.177463	0.330376	0.0277911	0.713469	0.138838	0.146043	0.0778324
Right Rostral anterior cingulate cortex	0.0795358	-0.305734	0.277289	-0.0580941	-0.254713	0.477601	-0.166103	-1.02093	0.42825	-0.430458	0.112158	0.082688	0.107893	0.0810029	0.0531982	0.0518102	0.485959	-0.425917	0.179234	0.280902	0.294992	0.177712	-0.163658	0.0914041	0.0181677
Left Paracentral cortex	0.571291	0.0122925	-0.455831	0.353393	0.600357	0.20024	0.192735	-1.14876	0.514834	0.417531	-0.171159	-0.103902	-0.157909	0.269227	0.157808	0.203823	0.250935	0.0997857	-0.630686	-0.0482905	0.122347	0.390437	-0.276069	-0.22849	0.0473306
Right Paracentral cortex	1.29018	-0.232744	-0.194995	-0.0618343	-0.905431	0.661495	0.151507	-1.25811	0.231474	0.0588459	-0.478631	0.0214855	0.400245	0.12984	0.254529	0.424521	-0.0691873	0.510983	-0.27749	-0.0243028	0.454512	0.369961	0.0189517	0.175239	0.0687938
Left Precentral gyrus	0.629822	0.201648	-0.0875318	-0.0309574	1.29497	1.02279	0.585592	-1.28671	-0.577984	0.377668	-0.128937	-0.42211	-0.0639403	0.505745	-0.284336	-0.160346	-0.0801453	0.450761	-0.296753	-0.478608	0.0467585	0.0585283	-0.304911	0.490689	0.0609042
Right Precentral gyrus	0.40514	0.146673	-0.187146	-0.131938	0.400106	0.393759	0.0261162	-0.024257	-0.0323108	0.32488	-0.432514	0.179402	0.100593	0.325898	-0.356749	-0.0161161	0.0491204	0.361411	-0.270749	-0.307257	0.0505206	0.17786	-0.269922	0.273298	0.0494091
Left Postcentral gyrus	0.654956	0.80941	-0.470775	-0.0167387	1.22071	0.482844	0.168323	-1.027	0.379943	-0.28593	0.201154	-0.0201385	0.123498	0.369825	-0.00434927	-0.0139444	0.0561743	0.47773	-0.46206	-0.488693	0.0727016	-0.03589	0.0258129	0.316833	0.1056
Right Postcentral gyrus	0.256447	0.200414	0.0738834	-0.274618	0.404255	0.60108	-0.0586446	-0.0694718	-0.318844	0.111886	-0.0699965	-0.026978	0.00129572	-0.00734126	-0.576312	0.244349	-0.163596	0.353169	-0.710688	-0.363172	0.22361	0.418343	-0.257221	0.25479	0.0102766
Left Superior parietal cortex	0.434427	0.00322928	0.00587239	0.0625159	-0.365438	0.734771	0.0484307	0.160297	-0.397176	-0.00595699	0.49338	-0.322643	-0.0518631	0.139656	0.00772803	-0.8015	0.232139	0.24159	0.206157	-0.817027	-0.000701224	0.445464	-0.412296	0.0804378	0.00506216
Right Superior parietal cortex	0.278755	-0.279821	-0.372263	-0.206851	0.083043	0.554774	0.309456	0.469176	-0.225368	0.0197072	0.0287806	0.00155046	-0.0285733	0.783403	0.0767675	-0.345274	0.0221445	0.297548	-0.185371	-0.600501	0.390116	0.516209	-0.380827	-0.0845668	0.0467506
Left Supramarginal gyrus	0.657389	0.485767	-0.00344718	-0.231215	0.441758	0.975356	0.823844	-0.042256	0.0682388	-0.160648	0.287291	-0.113377	0.119367	-0.229991	-0.463189	-0.226884	0.332676	0.206571	-0.472513	0.0865845	-0.256568	0.557637	-0.196924	-0.0244365	0.10921
Right Supramarginal gyrus	0.362302	0.387858	0.160825	0.173683	0.538785	0.556984	0.79606	-0.737226	0.000891435	0.215045	-0.138117	0.365959	-0.0922814	0.0378138	-0.126718	0.170132	0.577777	0.00784874	-0.634262	-0.08545	0.116963	0.306689	-0.424586	-0.306213	0.0929484
Left Superior temporal cortex	0.559748	0.247377	0.11916	-0.413652	0.99444	1.31631	0.970614	0.343761	-0.558523	-0.0589911	0.832877	-0.0158937	-0.30878	0.30154	0.13659	-0.689981	-0.19455	-0.144885	-0.177476	0.0919152	0.3766	0.461169	-0.227539	0.174945	0.172366
Right Superior temporal cortex	0.509041	0.631762	0.394439	-0.243523	2.28431	0.756616	0.533371	0.714599	-0.0489584	0.00240182	0.146096	-0.00232292	0.273566	0.332377	0.154031	-0.21911	0.237946	-0.359377	-0.138259	0.216376	0.306489	0.412872	-0.584291	0.216548	0.271958
Left Banks of the Superior temporal sulcus	0.242598	0.599492	-0.441059	0.0123173	0.586937	0.562649	0.337454	-0.51775	-0.00348268	0.210177	0.192415	1.03733	-0.215536	0.0325289	-0.0628385	-0.503877	0.648133	0.347526	0.0217062	-0.175182	-0.140327	1.00023	-0.338576	-0.0541146	0.140781
Right Banks of the Superior temporal sulcus	0.766401	0.228907	-0.479983	-0.94068	0.153424	0.483129	0.0694281	0.915615	0.22554	-0.147876	0.356416	0.323675	-0.0716804	0.1306	0.442557	-0.472935	0.459293	0.748372	-0.0464836	0.0604028	-0.149443	0.158619	-0.652049	0.00326848	0.106855
Left Transverse temporal cortex	0.626648	1.05886	0.206652	0.493127	-1.36909	0.975228	0.645924	0.47531	0.0602071	0.104401	-0.0711757	0.0783077	-0.357519	-0.0726438	0.588703	-0.476546	-0.135589	-0.42729	-0.22588	0.0717008	0.508241	0.233526	-0.269849	0.0734918	0.116448
Right Transverse temporal cortex	0.402504	0.498982	-0.208157	0.345024	0.77585	-0.128317	-0.0909206	-0.511545	0.0785254	-0.156755	0.301592	-0.316489	-0.0332994	0.0345271	0.346868	-0.0536056	-0.194911	0.0315251	-0.407474	0.204398	0.140728	0.237624	0.01075	-0.158182	0.0478851
Left Middle temporal cortex	0.179776	-0.0139543	0.369817	-0.263688	1.03594	2.00784	0.0141128	-0.161638	-0.00780837	0.175538	0.549991	0.119234	-0.403414	0.0635251	0.042408	-0.359999	0.136056	0.116002	-0.861704	-0.223672	-0.088908	0.293146	0.159904	0.0450204	0.121813
Right Middle temporal cortex	-0.00198674	0.368524	-0.17464	-0.369419	0.697521	1.04685	0.581377	0.328461	0.165804	0.0787176	0.615674	0.0667411	0.277377	0.230076	-0.0958605	0.10525	0.1303	-0.167379	0.00332747	-0.0612296	0.314177	-0.0957911	-0.162564	-0.616664	0.136027
Left Inferior temporal cortex	0.392658	-0.0555681	0.235244	0.135694	0.844291	3.65832	-0.15216	0.582175	0.0707132	0.0396711	0.474739	0.10989	-0.542606	0.350655	-0.0663227	0.139058	0.0733544	-0.507126	-0.254061	-0.111264	-0.30538	0.449005	-0.0553933	-0.0183935	0.228633
Right Inferior temporal cortex	0.184119	0.160745	0.210114	0.0538187	0.692429	0.513232	0.0343042	0.567471	-0.210817	0.0284396	0.0367048	-0.0298608	0.396665	0.235237	0.248137	0.352702	0.146917	-0.214582	0.400357	-0.0227624	0.0172526	0.0713012	-0.175542	-0.155559	0.147534
Left Lingual gyrus	0.377805	-0.227259	-0.406782	0.818683	0.460352	0.812586	0.994012	1.96248	-0.257073	-0.507112	0.903165	0.336291	-0.561331	0.11232	-0.0113109	0.204572	0.192522	-0.424931	-0.36091	-0.588179	-0.012403	0.45568	-0.189015	-0.0688393	0.167305
Right Lingual gyrus	0.389809	0.0215751	-0.130877	0.690284	0.253215	0.192112	0.644757	0.607467	-0.559003	-0.444548	0.139062	0.00621056	-0.126028	0.0980209	-0.261099	-0.166735	0.263298	0.282571	-0.0213475	-0.325013	0.0100497	0.542182	-0.129327	0.0264837	0.0834633
Left Lateral occipital cortex	0.154885	-0.210866	-0.529589	-0.058404	0.639855	1.06957	0.634951	1.61968	-0.0919231	-0.300363	0.104644	0.242522	0.0461834	0.154382	0.30521	-0.634151	0.0620129	-0.142222	0.0739981	-0.620201	-0.299272	0.317471	-0.095605	-0.183216	0.094148
Right Lateral occipital cortex	0.319075	-0.184459	-0.535836	-0.111217	1.01588	0.742337	0.307631	0.393447	-0.0495951	0.52939	-0.24987	0.119344	0.0571676	-0.126126	0.228118	0.395558	0.0792945	0.00391911	-0.0962436	-0.623123	-0.219499	0.322533	0.16302	-0.213692	0.0944606
Left Pericalcarine cortex	0.293913	-0.0709548	-0.162823	0.195327	0.549759	1.06811	0.95364	1.3126	-0.214031	-0.042307	0.381994	-0.116731	-0.782254	-0.163669	-0.185501	-0.256066	0.135205	-0.249965	-0.271647	-0.497513	-0.807985	0.117658	0.060121	0.214791	0.0609031
Right Pericalcarine cortex	0.353165	-0.354472	0.281593	-0.697064	0.145128	0.271842	0.765004	0.429928	-0.279976	-0.238023	0.583748	-0.00343087	-0.0136168	-0.0774861	-0.0806561	-0.0412332	0.0647328	-0.0636693	-0.175742	-0.378192	-0.398534	0.106723	0.384199	-0.211413	0.0155231
Left Cuneus	-0.241326	-0.526005	0.0947173	-0.268153	0.512338	0.443999	0.0943831	0.907611	0.214007	0.602851	-0.0803162	0.345135	-0.870175	0.122652	-0.272017	0.344438	-0.389781	0.33963	0.47375	-0.485076	-0.0129269	0.424329	0.102872	-0.132268	0.0726945
Right Cuneus	0.164047	-0.326424	-0.253243	-0.421513	0.359372	-0.156387	0.413771	0.263207	0.00942594	0.0432809	-0.693136	-0.337035	-0.13398	0.166122	-0.345834	0.0440007	-0.0823742	-0.132191	0.047054	-0.21831	-0.103101	0.491451	0.0878475	-0.19363	-0.0544825
Left Fusiform gyrus	0.742554	-0.278957	0.222054	-0.0372228	0.59893	1.26827	-0.0132396	-0.00889231	-0.170211	-0.533164	-0.234202	-0.291818	-0.543849	0.215263	0.258748	-0.159404	0.018195	-0.096904	-0.330807	-0.132061	-0.0406331	0.498639	-0.365789	0.0959194	0.0283923
Right Fusiform gyrus	1.03861	-0.128312	0.470135	-0.288081	0.253184	0.581985	0.0751915	0.227372	-0.151399	-0.290046	-0.821268	-0.127154	-0.240078	0.166667	0.439273	0.256108	0.469118	0.0233747	-0.109331	0.0928077	-0.0604916	0.303716	-0.0194944	0.0525049	0.0922663
Left Thalamus proper	0.885024	0.254066	-0.338309	-0.445961	0.144435	0.981484	-0.48169	-0.350817	-0.212553	0.262234	0.232104	0.406013	-0.431226	0.624215	0.0676107	-0.250552	0.0768743	-0.00571943	-0.115221	-0.232491	0.24883	-0.00910137	-0.375332	0.114809	0.0436969
Right Thalamus proper	0.164446	-0.150381	0.444367	0.0500765	0.368263	0.335634	-0.0142892	0.119095	-0.156298	-0.252102	0.109326	0.0557121	-0.334054	0.767765	0.396503	-0.690195	0.15	-0.241051	-0.041644	0.187672	0.506276	0.677494	-0.514959	0.395251	0.0972044
Brainstem	0.95557	-0.00468433	0.627318	0.324089	-0.766958	1.1263	-0.569984	-0.293693	-0.111344	-0.31391	0.0733741	0.0475486	-0.194463	0.64537	0.0558494	-0.184649	0.759119	-0.0425996	-0.0139926	-0.127342	0.0468625	0.406899	-0.0420339	-0.285342	0.0882211
Left Temporal pole	0.27537	-0.0655054	0.326198	0.437053	0.978459	2.76363	0.121908	0.106593	-0.348037	-0.433597	0.462845	-0.464856	-0.464005	0.137384	0.21389	-0.0924977	-0.224216	-0.390164	-0.863517	0.213957	0.0711797	0.704424	0.0934759	-0.121845	0.143255
Right Temporal pole	0.598923	-0.454432	-0.409741	0.542588	-1.26312	0.594334	0.664184	-0.830863	-0.470835	-0.52071	-0.209749	-0.0923196	0.691817	0.31544	0.537591	0.532349	0.242793	0.0615382	0.758474	0.156059	0.0490662	0.173763	-0.288933	-0.577072	0.0333809
