# Supplementary material for: Neural pattern change during encoding of a narrative predicts retrospective duration estimates
Source: eLife. 2016 Nov 1;5:e16070. doi: 10.7554/eLife.16070 (PMC5243117; doi:10.7554/eLife.16070)
Supplement: Figure 7—source data 1. — Parameter estimates are provided for four variants of the mixed-effects ROI analysis: 1) full model (with naïve estimates) using the Chung et al., 2015 blme fitting procedure and Box-Cox transform of duration estimates (see Materials and methods), 2) model without naïve estimates, using the Chung et al., 2015 blme fitting procedure and Box-Cox transform of duration estimates, 3) full model (with naïve estimates) using the Bates et al., 2015 lme4 fitting procedure and Box-Cox transform of duration estimates, and 4) full model (with naïve estimates) using the Chung et al., 2015 blme fitting procedure, but without any transform of duration estimates. The first analysis variant, which is the most conservative, is the one reported in the Results and plotted in Figure 7. DOI: http://dx.doi.org/10.7554/eLife.16070.019 [file elife-16070-fig7-data1.xlsx]

## Sheet: Figure7_sourceData1
	Chung et al. 2015 BLME Fitting Procedure				Chung et al. 2015 BLME Fitting Procedure				Bates et al. 2015 LME4 Fitting Procedure				Chung et al. 2015 BLME Fitting Procedure
	Box-Cox Transform				Box-Cox Transform				Box-Cox Transform				No Transform
	Model with Naïve Estimates				Model without Naïve Estimates				Model with Naïve Estimates				Model with Naïve Estimates
Brain Region	Estimate	95% CI Lower	95% CI Upper		Estimate	95% CI Lower	95% CI Upper		Estimate	95% CI Lower	95% CI Upper		Estimate	95% CI Lower	95% CI Upper
Left Precuneus	-0.125662	-0.564252	0.312927		-0.144293	-0.575508	0.286922		-0.0979376	-0.461357	0.265482		-0.400174	-1.45422	0.653876
Right Precuneus	-0.379191	-0.838196	0.0798141		-0.449342	-0.901665	0.00298042		-0.338006	-0.744156	0.0681448		-1.67001	-3.03165	-0.308368
Left Isthmus of the cingulate	-0.123678	-0.521478	0.274122		-0.127029	-0.550525	0.296467		-0.140272	-0.451079	0.170535		0.219584	-0.98288	1.42205
Right Isthmus of the cingulate	-0.0971378	-0.511887	0.317611		-0.14733	-0.595067	0.300408		-0.0983885	-0.460316	0.263539		-0.347277	-1.51964	0.82509
Left Posterior cingulate cortex	0.00240969	-0.414149	0.418968		0.0707825	-0.361321	0.502886		-0.00335263	-0.382689	0.375984		0.0450637	-0.954465	1.04459
Right Posterior cingulate cortex	0.151115	-0.237728	0.539958		0.0692743	-0.330764	0.469313		0.159995	-0.180715	0.500706		0.596973	-0.441765	1.63571
Left Caudate	0.176466	-0.193402	0.546334		0.197597	-0.16157	0.556765		0.155156	-0.16402	0.474333		0.425471	-0.46657	1.31751
Right Caudate	0.0558288	-0.289889	0.401546		0.0897895	-0.266114	0.445693		0.0443914	-0.271474	0.360257		-0.00648699	-0.895103	0.882129
Left Pallidum	-0.114341	-0.588357	0.359675		-0.108177	-0.565745	0.349391		-0.0685771	-0.477528	0.340373		-0.202058	-1.61126	1.20714
Right Pallidum	0.0347483	-0.428352	0.497849		-0.0617139	-0.52059	0.397162		0.0552496	-0.350568	0.461067		-0.417319	-1.64868	0.814045
Left Medial orbitofrontal cortex	0.0565062	-0.266791	0.379803		0.0644828	-0.269089	0.398054		0.061374	-0.21909	0.341838		0.248137	-0.552887	1.04916
Right Medial orbitofrontal cortex	-0.0312149	-0.401543	0.339113		-0.0561883	-0.445465	0.333088		-0.0211961	-0.317047	0.274654		0.21753	-0.739066	1.17413
Left Lateral orbitofrontal cortex	-0.158645	-0.650334	0.333045		-0.145243	-0.670571	0.380085		-0.153676	-0.600682	0.293329		-0.241034	-1.30212	0.820049
Right Lateral orbitofrontal cortex	0.0718704	-0.281708	0.425449		0.117118	-0.244067	0.478303		0.127468	-0.168475	0.423411		0.151005	-0.77405	1.07606
Left Pars orbitalis	0.151463	-0.241803	0.544728		0.210775	-0.181794	0.603344		0.123152	-0.21138	0.457684		0.532355	-0.598614	1.66332
Right Pars orbitalis	0.205873	-0.103897	0.515642		0.246297	-0.0634352	0.556029		0.204301	-0.0806603	0.489262		0.746164	-0.1379	1.63023
Left Pars triangularis	0.0283644	-0.329627	0.386356		0.0557932	-0.314914	0.426501		0.0279637	-0.271241	0.327168		0.0932841	-1.01071	1.19728
Right Pars triangularis	-0.0435212	-0.436974	0.349932		-0.0257563	-0.434652	0.383139		-0.0178719	-0.358851	0.323107		0.287564	-0.789617	1.36475
Left Caudal middle frontal cortex	0.0766103	-0.354592	0.507812		0.132515	-0.293675	0.558705		0.0670065	-0.2959	0.429913		0.695487	-0.421438	1.81241
Right Caudal middle frontal cortex	0.363707	-0.0768629	0.804278		0.335757	-0.105952	0.777466		0.338261	-0.0756813	0.752204		1.7062	0.520414	2.89199
Left Rostral middle frontal cortex	-0.0779956	-0.694763	0.538772		-0.0826384	-0.705765	0.540488		-0.0634626	-0.626002	0.499077		0.667069	-0.828502	2.16264
Right Rostral middle frontal cortex	0.226475	-0.216244	0.669193		0.206583	-0.264678	0.677844		0.24103	-0.160626	0.642686		1.30486	0.00677231	2.60296
Left Superior frontal cortex	0.211474	-0.265039	0.687986		0.195905	-0.296635	0.688444		0.183747	-0.229359	0.596853		0.68716	-0.458909	1.83323
Right Superior frontal cortex	0.137409	-0.316066	0.590883		0.111633	-0.344984	0.568251		0.121608	-0.284296	0.527513		0.85923	-0.377409	2.09587
Left Frontal pole	-0.0107603	-0.660694	0.639174		-0.0624337	-0.794326	0.669459		0.044784	-0.493899	0.583467		0.448044	-1.99549	2.89157
Right Frontal pole	-0.0967178	-0.463226	0.269791		-0.131765	-0.531478	0.267948		-0.0756727	-0.396192	0.244847		0.133555	-0.806398	1.07351
Left Caudal anterior cingulate cortex	0.461996	0.0994638	0.824527		0.47252	0.104354	0.840687		0.482331	0.130477	0.834185		1.17836	0.177558	2.17915
Right Caudal anterior cingulate cortex	0.208199	-0.175282	0.59168		0.212554	-0.184908	0.610015		0.213329	-0.129675	0.556332		0.761029	-0.540448	2.06251
Left Rostral anterior cingulate cortex	0.110619	-0.226497	0.447736		0.0726342	-0.290685	0.435953		0.106415	-0.198047	0.410877		0.445966	-0.388903	1.28083
Right Rostral anterior cingulate cortex	-0.00263629	-0.360229	0.354956		-0.0583323	-0.424724	0.308059		-0.00586701	-0.336233	0.324499		0.243389	-0.695603	1.18238
Left Paracentral cortex	0.0558585	-0.299993	0.41171		0.0882931	-0.2788	0.455386		0.0527677	-0.249459	0.354994		0.129788	-0.746954	1.00653
Right Paracentral cortex	0.308116	-0.109354	0.725585		NaN	NaN	NaN		0.326051	-0.0376166	0.689718		0.658681	-0.390525	1.70789
Left Precentral gyrus	0.0352834	-0.507987	0.578554		0.162419	-0.402575	0.727414		0.0347724	-0.418927	0.488472		0.622568	-0.704039	1.94917
Right Precentral gyrus	0.126018	-0.354596	0.606632		0.21613	-0.284448	0.716708		0.119309	-0.281712	0.52033		1.00796	-0.407854	2.42377
Left Postcentral gyrus	0.117732	-0.341793	0.577256		0.136018	-0.384712	0.656749		0.150292	-0.225775	0.526358		0.488727	-0.863616	1.84107
Right Postcentral gyrus	0.101978	-0.354529	0.558484		0.132758	-0.352795	0.618311		0.119713	-0.305635	0.545061		0.974771	-0.266996	2.21654
Left Superior parietal cortex	-0.190996	-0.582893	0.200901		-0.112951	-0.498753	0.272852		-0.131029	-0.477468	0.21541		-1.04172	-2.27209	0.188653
Right Superior parietal cortex	-0.0145488	-0.484088	0.45499		0.059442	-0.371498	0.490382		0.031474	-0.313331	0.376279		-0.347736	-1.54798	0.852514
Left Supramarginal gyrus	0.199793	-0.26179	0.661377		0.200005	-0.298099	0.698109		0.208163	-0.206758	0.623085		0.494289	-0.655212	1.64379
Right Supramarginal gyrus	0.216113	-0.252083	0.684309		0.203315	-0.282077	0.688707		0.198246	-0.193686	0.590178		1.22981	-0.0126329	2.47225
Left Inferior parietal cortex	-0.0109266	-0.479035	0.457182		0.00839425	-0.437007	0.453795		-0.0269576	-0.445465	0.39155		0.0682084	-0.966214	1.10263
Right Inferior parietal cortex	0.0107599	-0.438127	0.459646		0.0283991	-0.429847	0.486645		-0.0280425	-0.423284	0.367199		0.470193	-0.881681	1.82207
Left Superior temporal cortex	0.174637	-0.27642	0.625693		0.218874	-0.243128	0.680875		0.187846	-0.201923	0.577615		0.352591	-0.806619	1.5118
Right Superior temporal cortex	0.445065	-0.0227855	0.912915		0.456498	-0.0126656	0.925661		0.432507	0.0143967	0.850617		1.32146	-0.105798	2.74871
Left Banks of the Superior temporal sulcus	0.212516	-0.114939	0.539972		0.210227	-0.124577	0.54503		0.211518	-0.068357	0.491394		0.639902	-0.18163	1.46143
Right Banks of the Superior temporal sulcus	0.113473	-0.241329	0.468275		0.122385	-0.227159	0.471929		0.0849627	-0.222304	0.392229		0.348292	-0.543344	1.23993
Left Transverse temporal cortex	0.277905	-0.149889	0.705699		0.322328	-0.120617	0.765274		0.327079	-0.044784	0.698942		0.300493	-0.674357	1.27534
Right Transverse temporal cortex	0.193391	-0.119398	0.50618		0.191932	-0.144048	0.527912		0.171663	-0.101903	0.44523		0.801752	-0.0621607	1.66566
Left Middle temporal cortex	-0.0547819	-0.462314	0.35275		-0.0588553	-0.475085	0.357374		-0.0469704	-0.399813	0.305873		0.270825	-0.839427	1.38108
Right Middle temporal cortex	0.157041	-0.286268	0.60035		0.155617	-0.299161	0.610394		0.148096	-0.247187	0.543379		1.24641	0.0375245	2.4553
Left Inferior temporal cortex	-0.0131487	-0.425507	0.39921		0.0345697	-0.379178	0.448318		-0.040269	-0.394572	0.314034		0.451287	-0.758205	1.66078
Right Inferior temporal cortex	0.170698	-0.196138	0.537534		0.206171	-0.164405	0.576746		0.173118	-0.158803	0.505039		1.15522	0.0383107	2.27212
Left Lingual gyrus	0.0989374	-0.387752	0.585627		0.105795	-0.346379	0.557969		0.0994634	-0.27529	0.474217		0.157951	-1.27882	1.59472
Right Lingual gyrus	0.15214	-0.247702	0.551982		0.141396	-0.255142	0.537933		0.16357	-0.170151	0.497291		0.392734	-0.582139	1.36761
Left Lateral occipital cortex	0.0752033	-0.361209	0.511616		0.0871322	-0.320677	0.494941		0.080352	-0.292636	0.45334		0.0496754	-0.999188	1.09854
Right Lateral occipital cortex	0.0340676	-0.335765	0.4039		0.0600483	-0.319105	0.439202		0.0756427	-0.24185	0.393135		-0.225267	-1.26628	0.815742
Left Pericalcarine cortex	0.0241158	-0.329437	0.377669		0.0636091	-0.28983	0.417048		0.0413073	-0.261324	0.343939		0.110962	-0.809776	1.0317
Right Pericalcarine cortex	-0.0933169	-0.450987	0.264353		-0.111471	-0.482717	0.259774		-0.0954519	-0.40318	0.212276		-0.224126	-1.31095	0.8627
Left Cuneus	0.0290759	-0.344696	0.402848		0.0508206	-0.323811	0.425453		0.024033	-0.310349	0.358415		0.338972	-0.789163	1.46711
Right Cuneus	-0.0162909	-0.367269	0.334687		-0.0208663	-0.371652	0.32992		0.00726471	-0.294336	0.308865		0.0199064	-1.07217	1.11199
Left Fusiform gyrus	-0.0903638	-0.55161	0.370883		-0.0146344	-0.485082	0.455814		-0.114801	-0.483615	0.254012		-0.142405	-1.36677	1.08196
Right Fusiform gyrus	0.187413	-0.210312	0.585138		0.201335	-0.199071	0.601742		0.17615	-0.183745	0.536046		0.811998	-0.319903	1.9439
Left Thalamus proper	0.00103175	-0.474513	0.476576		0.0554022	-0.42293	0.533734		0.0334077	-0.373255	0.44007		0.124162	-1.21927	1.46759
Right Thalamus proper	0.268108	-0.296572	0.832788		0.264023	-0.261091	0.789138		0.232274	-0.248219	0.712768		0.422953	-0.992471	1.83838
Brainstem	0.0815932	-0.564123	0.727309		0.0923998	-0.590104	0.774903		0.111542	-0.47047	0.693553		-0.322259	-2.07466	1.43014
Left Parahippocampal cortex	0.160743	-0.271377	0.592864		0.220435	-0.217425	0.658295		0.176632	-0.18645	0.539713		0.23839	-0.924382	1.40116
Right Parahippocampal cortex	0.197637	-0.227384	0.622658		0.1548	-0.282264	0.591864		0.205467	-0.163482	0.574417		0.722908	-0.430562	1.87638
Left Entorhinal cortex	0.245348	-0.190684	0.68138		0.26666	-0.166222	0.699541		0.238847	-0.150975	0.628669		0.630868	-0.594037	1.85577
Right Entorhinal cortex	0.400661	0.0421239	0.759198		0.429325	0.0598839	0.798766		0.398439	0.0879646	0.708914		1.03797	0.101947	1.97399
Left Perirhinal cortex	-0.0657126	-0.438606	0.307181		0.0244533	-0.389786	0.438693		-0.0476887	-0.36337	0.267992		-0.136848	-1.09985	0.826149
Right Perirhinal cortex	0.22935	-0.130299	0.588999		0.22607	-0.123946	0.576086		0.218065	-0.11181	0.547941		0.976783	-0.00948236	1.96305
Left Amygdala	0.132395	-0.176975	0.441764		0.204523	-0.11085	0.519897		0.148596	-0.119104	0.416296		0.280612	-0.557123	1.11835
Right Amygdala	0.315049	-0.0211664	0.651264		0.324235	-0.0188461	0.667317		0.29484	0.0149083	0.574772		0.444567	-0.357758	1.24689
Left Temporal pole	-0.00571071	-0.322808	0.311386		-0.00694022	-0.305917	0.292037		-0.00730494	-0.291356	0.276746		0.337343	-0.576532	1.25122
Right Temporal pole	0.136249	-0.247231	0.519729		0.0775468	-0.347519	0.502613		0.185608	-0.14914	0.520356		0.24567	-0.851845	1.34319
Left Insula	0.309586	-0.175464	0.794636		0.37959	-0.0941987	0.85338		0.382814	-0.0241622	0.789791		0.633181	-0.58976	1.85612
Right Insula	0.36223	-0.167567	0.892028		0.383429	-0.196187	0.963046		0.367037	-0.10709	0.841163		1.24543	-0.0765658	2.56743
Left Putamen	-0.03629	-0.532747	0.460167		0.013149	-0.456759	0.483057		-0.0263171	-0.4643	0.411665		0.0310609	-1.37973	1.44185
Right Putamen	-0.0454853	-0.494282	0.403311		-0.0733898	-0.545565	0.398786		-0.0444095	-0.440311	0.351492		-0.0726275	-1.36823	1.22297
Left Pars opercularis	0.29249	-0.098562	0.683541		0.291027	-0.102944	0.684997		0.284234	-0.0327623	0.60123		1.18111	0.128742	2.23347
Right Pars opercularis	-0.0484513	-0.430631	0.333728		0.0236477	-0.392531	0.439826		-0.0468189	-0.388216	0.294578		0.768094	-0.394325	1.93051
Left Hippocampus	0.234405	-0.196282	0.665092		0.277403	-0.164513	0.719319		0.224242	-0.14143	0.589913		1.04342	-0.289275	2.37612
Right Hippocampus	0.0600581	-0.291031	0.411147		0.078054	-0.28825	0.444358		0.0614159	-0.249127	0.371959		0.0953121	-0.805985	0.996609
