# Supplementary material for: Neural pattern change during encoding of a narrative predicts retrospective duration estimates
Source: eLife. 2016 Nov 1;5:e16070. doi: 10.7554/eLife.16070 (PMC5243117; doi:10.7554/eLife.16070)
Supplement: Figure 11—source data 1. — Data prior to high-pass filtering and after high-pass filtering (cut-off = 480 s) are provided. The unfiltered neural pattern distances tend to increase with time in story, even in the CSF and white matter. To generate the plots in Figure 11, duration estimates and pattern distances were averaged across participants for each interval and plotted as a function of the interval’s position in the story. The interval’s position in the story (in minutes) was set as the middle time point between the two clips delimiting it. DOI: http://dx.doi.org/10.7554/eLife.16070.025 [file elife-16070-fig11-data1.xlsx]

## Sheet: High-Pass Filtered 480s
SubjectNumber	IntervalPosition	SubjectiveDuration	Confidence	LeftPrecuneus	RightPrecuneus	LeftIsthmusofthecingulate	RightIsthmusofthecingulate	LeftPosteriorcingulatecortex	RightPosteriorcingulatecortex	LeftCaudate	RightCaudate	LeftPallidum	RightPallidum	LeftMedialorbitofrontalcortex	RightMedialorbitofrontalcortex	LeftLateralorbitofrontalcortex	RightLateralorbitofrontalcortex	LeftParsorbitalis	RightParsorbitalis	LeftParstriangularis	RightParstriangularis	LeftCaudalmiddlefrontalcortex	RightCaudalmiddlefrontalcortex	LeftRostralmiddlefrontalcortex	RightRostralmiddlefrontalcortex	LeftSuperiorfrontalcortex	RightSuperiorfrontalcortex	LeftFrontalpole	RightFrontalpole	LeftCaudalanteriorcingulatecortex	RightCaudalanteriorcingulatecortex	LeftRostralanteriorcingulatecortex	RightRostralanteriorcingulatecortex	LeftParacentralcortex	RightParacentralcortex	LeftPrecentralgyrus	RightPrecentralgyrus	LeftPostcentralgyrus	RightPostcentralgyrus	LeftSuperiorparietalcortex	RightSuperiorparietalcortex	LeftSupramarginalgyrus	RightSupramarginalgyrus	LeftInferiorparietalcortex	RightInferiorparietalcortex	LeftSuperiortemporalcortex	RightSuperiortemporalcortex	LeftBanksoftheSuperiortemporalsulcus	RightBanksoftheSuperiortemporalsulcus
1	1.55	2.71667	1	1.35455	1.28858	0.925422	1.17758	1.09171	1.09295	0.331668	0.617267	0.922721	1.22413	0.458173	0.701088	0.34152	0.945707	0.461599	1.16893	0.878888	0.553524	0.970528	0.634811	0.633418	0.712592	0.646869	0.457072	NaN	0.884469	0.591323	0.618075	0.424819	0.359588	1.08557	0.955194	1.14568	0.928198	1.28717	1.16145	1.24236	1.19488	0.675523	0.707983	0.923008	0.973199	0.423773	0.598004	0.64807	0.679103
1	1.775	2.01667	1	1.0197	1.3149	0.694911	0.342984	0.700369	0.83521	1.18622	0.941384	0.822288	1.54798	1.19856	1.05347	1.23773	1.01897	1.53018	0.73509	1.24514	0.937782	1.0483	1.34298	1.25425	1.15555	1.33501	1.34078	NaN	0.704096	0.72714	0.883529	1.15839	1.37677	1.18272	1.47579	1.04619	1.27425	1.18436	1.00672	1.46486	1.60246	0.732628	1.21433	0.843983	0.921516	1.15192	0.879474	0.633155	0.882324
1	2.6	0.75	0	0.763601	0.74289	0.526972	0.237982	1.15136	1.18549	0.895114	0.470409	1.19081	0.965692	1.38234	1.35359	1.20171	1.34743	1.21043	1.12618	1.34625	0.8279	1.08972	0.887312	1.28098	1.0755	1.3629	1.07375	NaN	1.19282	1.25934	0.939471	1.4824	1.13382	1.15223	1.29925	1.2372	0.522695	0.821097	0.753853	0.938071	0.724435	1.17425	0.805841	0.612341	0.928261	1.02411	0.99107	1.6837	1.49615
1	3.2	5.8	0	0.972544	1.1228	0.850386	1.54478	1.60589	1.51827	1.1952	1.1673	1.48359	1.67366	0.516073	1.02754	0.578835	0.854735	0.575359	0.747557	1.07947	1.09767	1.19377	1.06224	0.825378	0.762556	1.12129	1.02635	NaN	1.16751	1.1872	1.39657	0.79395	1.0272	1.23374	1.28014	1.46314	1.36698	1.46923	1.11835	1.14553	1.05702	1.47486	1.41892	1.20287	1.32793	1.03584	1.53936	1.44301	1.14384
1	4.875	3.35	0	0.983482	0.973131	1.37382	1.15605	1.72358	1.64798	1.73037	1.455	1.64185	1.82251	1.73372	1.68992	1.60827	1.37546	1.67336	1.77169	1.41326	1.59917	1.37155	1.52148	1.44509	1.2249	1.5353	1.43199	NaN	1.77723	1.43543	1.43192	1.61788	1.70981	1.50307	1.59587	1.19258	1.3204	1.08342	1.42394	1.29723	1.5064	1.55044	1.58227	1.3233	1.31099	1.48791	1.1243	0.996338	1.63063
1	5.6	3	0	0.486887	0.530518	0.488877	1.15309	0.646812	0.559986	1.06981	1.07341	0.707515	0.728718	1.41928	0.864074	0.682693	0.532249	0.842809	0.821414	1.21707	0.948619	0.515499	0.558582	0.968191	0.662892	0.883329	0.782203	NaN	1.23581	0.912766	0.385289	1.33289	1.08743	0.611544	0.770442	0.680249	0.678192	0.560476	0.455249	0.418619	0.388428	0.865932	0.796379	0.444749	0.814998	0.954522	1.09683	1.18816	1.06638
1	6.45	7.35	1	0.707699	0.673205	1.52836	0.610118	0.918203	0.838926	1.5484	1.14622	1.22468	1.43652	1.12493	1.3741	1.36934	1.69112	1.3777	1.24126	1.10648	1.17545	1.34591	1.28034	1.39808	1.36324	1.37705	1.27314	NaN	1.74434	1.34586	1.25193	1.09807	1.3593	0.963508	1.21222	1.1377	0.915039	1.10029	0.979244	1.16076	1.05625	0.807609	1.05273	0.651079	0.594472	1.32687	1.15623	1.42442	1.30173
1	10	2	0	0.798852	0.556611	0.844144	0.28089	0.629212	0.977257	0.606463	0.838775	1.10453	0.582266	0.478689	0.390791	0.589603	0.447365	0.851416	0.940791	0.713675	0.782838	0.892768	0.692996	0.830678	0.632606	0.743571	0.837696	NaN	0.0229957	0.721583	0.790371	0.699141	0.548738	0.532891	0.730072	0.532373	0.636648	0.710972	0.744992	0.340496	0.468036	0.686007	0.874624	0.495505	0.447637	0.499437	0.293534	0.807212	1.0714
1	10.2	2.03333	0	0.264506	0.423023	0.203719	0.771869	0.38582	0.608715	0.843014	0.529648	1.22167	0.784526	0.219776	0.46631	0.602088	0.771979	0.720995	0.290103	0.375451	0.711064	0.16645	0.271095	0.494923	0.286962	0.433391	0.340008	NaN	0.114633	0.525079	0.739333	0.680925	0.314116	0.644003	0.429004	0.50201	0.488731	0.728806	0.657113	0.51144	0.4234	0.377831	0.579241	0.338836	0.387396	0.380036	0.403788	0.386596	0.498808
1	10.75	8	0	0.974507	1.035	1.58177	1.46844	1.38583	1.25351	0.997728	0.912912	0.880858	0.90607	1.26696	0.822538	1.59389	1.5026	1.73764	1.74191	1.45775	1.64856	1.15469	0.909089	1.14603	1.36107	1.37389	1.22108	NaN	0.92943	1.33316	1.65507	1.43429	1.0126	0.918514	0.789683	1.30129	0.912283	1.04611	0.847616	1.3716	1.32964	1.18134	0.99713	1.49945	1.15222	1.0146	0.784608	1.1276	0.628154
1	11.425	2.66667	0	1.3152	1.4118	0.827675	0.790617	0.693623	0.335793	0.677544	1.04514	0.678363	0.737895	0.802692	0.575514	0.884344	0.710295	0.46061	0.765943	1.11185	0.464365	1.02207	1.03367	1.20636	0.937772	1.11791	0.922068	NaN	1.07446	0.789682	0.63506	0.87594	0.615192	0.456954	0.410211	0.861078	0.665136	1.14961	0.746496	0.938768	0.856793	1.28198	1.13626	0.979571	1.09491	0.898113	0.766069	1.07406	0.656818
1	12.825	2.5	0	0.907162	1.04808	1.31269	1.33574	1.27258	1.04446	1.5898	1.49725	1.21803	0.875235	0.934824	0.937086	1.17568	1.44529	1.53764	1.28596	1.03571	1.28289	1.20821	1.17804	1.15837	1.35343	1.06562	1.01824	NaN	1.41755	1.43558	1.70243	0.416908	1.21715	1.29596	1.22638	1.36179	1.36061	1.23858	1.18987	1.53875	1.57483	0.719842	1.16904	0.964327	0.950017	1.12323	1.10591	1.36363	0.999465
1	14.15	4	0	1.3849	1.56973	1.31033	1.39953	1.48681	1.08188	1.67638	1.50563	1.19426	1.20627	1.18042	0.699484	0.722534	1.39366	0.863939	1.14852	0.976111	1.04775	0.995566	0.9283	0.76313	1.07805	0.921175	1.07812	NaN	1.08241	1.647	1.52824	0.734737	0.812216	1.02086	1.15582	1.06244	1.17621	1.02062	1.15849	1.46433	1.36654	0.617384	1.08789	1.16655	1.05074	1.08289	1.39113	0.738067	1.02615
1	15.025	0.516667	1	1.47929	1.01444	1.58029	1.41823	1.37037	0.692422	1.2275	1.21588	0.580412	1.15456	1.12906	1.19198	1.31462	1.42502	1.02718	0.987583	1.43502	0.864301	1.10828	1.34761	1.22957	1.03049	0.9695	1.15476	NaN	0.962424	0.738357	0.753191	1.09107	1.57433	1.33556	0.918834	0.888782	1.25044	0.87698	1.38529	1.18235	1.2192	1.23202	1.31975	1.51844	1.46902	1.09431	1.63505	1.2402	1.33868
1	15.75	1.08333	0	1.391	1.12766	1.25293	0.771702	1.04548	0.52288	1.48465	0.861817	0.860388	0.794391	1.3501	1.20314	1.35177	0.89898	1.74719	0.535824	0.910045	0.815695	1.42188	0.716401	1.52771	1.56258	1.31809	0.834332	NaN	1.44439	0.934483	1.06583	1.71099	1.6501	0.983097	0.574976	1.49236	0.763677	0.898143	0.538644	1.33721	0.773188	0.74225	0.519621	1.59461	1.40624	1.37368	1.16141	1.63834	1.03374
1	16.55	0.566667	0	1.06878	0.594912	1.37439	1.30062	1.15264	0.986781	1.3384	0.82355	1.35543	0.811545	1.00184	0.687444	1.30284	1.30192	0.804675	1.35561	1.23773	1.30096	1.33238	1.42364	0.957503	1.06599	1.26303	1.19997	NaN	0.814889	1.49505	1.32026	1.11454	1.08028	0.992492	0.829286	1.39659	1.32163	1.18641	1.11776	1.18159	0.903571	1.1346	1.19151	1.16619	1.0323	1.32707	0.713632	1.30588	0.630004
1	17.175	2.35	1	1.23546	1.24148	0.954293	1.00723	1.46862	1.54451	0.786582	0.958975	1.10132	1.12026	1.39989	1.06279	1.29049	1.24163	1.65356	1.35133	1.10015	0.738056	1.37125	1.4447	0.998556	1.14758	1.36099	1.36535	NaN	1.28958	1.40901	1.39842	1.24906	1.11227	0.86869	0.92745	1.015	1.12194	1.20498	0.691949	0.996055	0.98811	1.37507	0.818246	0.754463	1.03743	1.16629	0.553015	1.5793	0.46178
1	19.5	5	1	0.933997	0.867224	0.762778	0.560784	0.280337	0.332229	0.979284	0.947387	0.806872	0.74222	0.508795	0.310641	0.725071	0.668389	1.35072	0.97733	0.652075	0.44024	0.77053	0.441521	0.693633	0.407403	0.597969	0.502242	NaN	0.390235	0.17138	0.456192	1.05214	0.427103	0.869865	1.15425	1.10295	0.801342	1.09135	1.02695	1.02616	1.05832	0.941056	0.625063	0.941445	0.506369	1.07238	1.15656	1.48171	1.20678
1	19.65	1.36667	0	0.962398	0.869342	0.747968	1.10159	0.967702	0.778347	0.901945	1.13233	0.692896	0.882395	0.722415	1.1355	0.703715	0.47542	1.13519	0.591247	1.40296	0.517886	1.25348	1.36087	1.29549	0.992943	1.09615	1.02522	NaN	0.967773	0.97556	0.982664	0.807117	1.25183	1.09396	0.785071	1.01898	0.930637	1.07253	0.991015	0.92759	0.690625	0.701494	1.1986	1.02118	0.799043	0.834643	0.545876	1.27882	0.329255
1	20.2	3	1	0.521602	0.520215	0.344668	0.739422	0.50086	0.475909	0.834075	0.473071	0.508946	0.597833	0.685956	0.322141	0.66631	0.37183	0.792994	0.472373	1.05276	0.398791	0.494227	0.336822	0.576245	0.425759	0.487517	0.522966	NaN	0.305253	0.838004	0.889489	0.435258	0.359498	0.639325	0.780288	0.876789	0.357837	0.771677	0.515424	0.889221	0.7953	0.928269	0.567581	0.628199	0.389806	0.993472	1.23464	0.73943	0.94375
1	20.525	2.5	0	1.25704	1.10139	1.28754	1.28959	1.24314	1.20086	1.43218	1.39791	0.678658	1.34612	1.31782	1.30353	1.06379	1.16694	0.909363	0.808083	0.793015	1.21692	1.44691	1.13863	1.39834	1.36601	0.954115	1.01863	NaN	1.35568	0.954996	0.988811	0.917762	1.27388	1.14582	1.36269	1.11972	1.10408	1.02514	1.1844	0.871227	0.731823	0.838026	1.0787	0.545904	0.738115	1.09099	0.802993	1.12807	0.597813
1	21.125	3	1	1.34134	1.39128	1.45826	1.65457	1.16038	1.68871	0.584984	0.947865	0.626627	0.84953	0.943664	0.837781	0.811459	0.453114	1.2779	0.966356	0.738904	0.509171	1.0301	1.24765	0.953247	0.82959	1.19719	0.982165	NaN	0.568416	0.985964	1.32394	1.09621	0.780209	1.11459	1.17251	0.876498	1.06439	0.5662	1.38212	1.40075	1.36529	1.13933	1.17178	1.51028	1.38747	1.02563	1.12127	1.44735	1.56372
1	23.25	0.35	1	1.51391	1.423	1.74008	1.49617	1.50662	1.29827	1.36016	1.75414	1.45775	1.30713	1.75029	1.67662	1.33689	1.35171	1.24208	1.52639	0.885584	1.57535	1.40621	1.03837	1.5537	1.42498	1.38021	1.45375	NaN	1.93164	1.31436	1.16425	1.42534	1.28784	1.64687	1.37833	1.38341	1.33436	1.49315	1.50807	1.21705	1.60894	1.11749	1.38485	1.39196	1.30713	1.45474	1.30987	1.38218	1.58714
1	23.7	0.566667	1	1.19097	1.34871	1.26205	1.42117	1.45224	1.26266	1.14795	1.42881	1.54691	1.07554	0.543174	0.944476	1.34068	1.10272	0.889311	0.789283	0.614505	1.23305	1.15252	0.835205	1.09684	1.16337	1.03294	0.970351	NaN	1.64788	0.780605	1.06924	0.937174	1.45994	1.11477	1.37252	1.1573	1.33304	1.28987	1.31482	1.17896	1.13762	1.08627	1.0782	0.816974	1.04696	1.35885	0.913717	1.52282	1.2353
2	1.55	4.66667	0	0.625468	1.02755	0.877279	1.24324	0.398983	0.580625	0.528524	0.988543	0.73824	1.49738	0.511449	1.16869	0.905603	0.902585	1.50635	0.797047	0.623487	1.40391	0.990839	0.829934	0.786379	1.19462	0.960751	0.805495	1.01619	NaN	0.674023	0.835003	0.780972	0.5219	1.2169	0.966389	1.09557	0.941587	0.947695	1.32733	0.729083	0.94202	1.03098	1.19003	0.76562	1.07375	0.858092	1.18541	0.510467	1.55403
2	1.775	4	0	1.02119	1.00511	1.12005	1.02258	0.455551	0.859799	1.42662	1.07727	1.40696	1.42554	0.75002	1.24829	1.16443	1.17729	1.44979	1.13938	0.803605	1.49934	1.25843	0.928349	1.11561	1.28894	1.0019	1.05104	0.989416	NaN	1.2886	1.08413	1.15288	1.24868	1.28575	0.996015	0.869686	1.11608	0.944249	1.50798	0.667428	0.769628	0.526361	1.46754	1.0214	1.39906	1.36304	1.56753	1.42515	1.65034
2	2.6	7	0	1.08501	1.01999	1.02836	0.624261	1.5321	1.31577	1.25957	0.640103	0.947761	0.307245	1.11097	0.682075	0.733166	0.219226	1.29341	0.640279	0.587134	0.786961	1.12851	0.468025	0.517635	0.629721	0.77878	0.578399	0.953812	NaN	1.45567	1.22787	1.08735	1.05942	1.2114	0.522297	0.98461	0.558147	1.1011	0.594547	0.647782	0.685242	0.702183	0.638215	1.08755	1.07074	1.05878	0.338629	0.998005	0.325776
2	3.2	10	0	0.490374	0.486134	0.289758	0.303256	0.240748	0.304201	0.370708	0.608366	0.183212	0.440215	0.468298	0.673253	0.696159	0.559309	0.490731	1.42559	0.66318	1.05868	0.305355	0.824768	0.54396	0.464069	0.562937	0.328971	0.211321	NaN	0.184024	0.480391	0.408662	0.374962	0.25977	0.305639	0.799274	0.825647	0.404994	0.693112	0.5849	0.555111	0.541949	1.03798	0.441625	1.00085	0.40329	1.21896	0.692552	1.19843
2	4.875	9	0	0.924771	1.0505	0.743603	1.26122	0.517533	0.483362	0.911244	0.703495	0.620353	0.66345	0.875732	1.18289	0.848067	0.933378	0.447551	0.929519	0.472013	0.804842	0.535549	0.613549	1.00726	0.989026	1.00621	0.966005	1.75808	NaN	0.221966	0.620957	0.373941	0.550408	1.13549	0.583432	0.591143	1.13668	0.818089	1.20544	1.13283	1.44004	0.887075	0.898155	0.770024	1.27962	1.08757	1.20147	0.603595	0.951575
2	5.6	5.66667	1	1.38432	1.37298	1.03567	1.66344	1.18092	1.10255	1.49093	1.53076	0.918631	1.30656	0.782529	1.00695	1.3537	1.5519	0.792599	1.65504	1.60683	1.44991	1.30445	1.72291	1.13727	0.856964	1.08085	1.27842	1.15463	NaN	1.38663	1.24695	1.44712	1.45435	1.72144	1.04544	1.20917	1.42908	1.23327	1.61129	1.47712	1.45064	1.53314	1.5079	1.23603	1.19026	1.39968	1.57476	1.70208	1.64512
2	6.45	15	0	1.43781	1.45049	1.22944	1.00571	1.45995	1.33467	1.45795	1.28646	1.42352	1.81511	0.553855	0.957122	0.987308	1.05513	1.55808	0.915262	1.12295	0.898989	0.822952	1.50099	0.94553	1.1791	0.812925	0.939886	1.53744	NaN	1.62194	1.26383	1.27881	0.704045	1.58106	1.43624	1.09946	1.22045	1.40436	1.37653	1.52739	1.46125	1.0279	1.43546	1.22608	1.41484	0.94426	1.69231	1.14829	1.58148
2	10	7	0	1.04757	1.11675	1.27822	1.25734	1.09583	0.634829	0.995763	1.53347	0.944325	0.879101	1.39775	1.07491	0.867937	0.81796	1.05261	1.03416	1.07869	1.51834	1.23933	1.35496	0.986437	1.32146	1.13541	1.10925	1.39426	NaN	1.27517	1.06759	1.39425	1.53115	1.14512	0.770543	1.05013	1.14345	1.23319	0.980427	0.760736	0.689945	1.31728	1.01096	1.16996	1.21038	1.26106	1.16898	0.77005	1.33207
2	10.2	5.66667	0	1.09883	0.963552	1.19558	1.03901	0.850221	0.737445	0.708536	1.5005	0.799339	1.15938	1.11618	1.4053	0.530305	1.41375	0.489187	1.40416	0.986012	1.37645	1.18565	1.22192	1.11014	1.33771	1.3173	1.14873	1.66123	NaN	0.576264	0.976702	1.5421	1.28568	1.18529	0.591989	0.90815	0.993182	1.01001	0.945036	1.25539	1.24743	1.08044	0.95476	1.05615	1.02825	0.832195	1.13198	0.967352	1.05283
2	10.75	5	0	0.974141	1.08956	0.624281	0.621105	0.653632	1.08582	1.27777	1.41986	1.65068	1.39676	1.34105	1.22735	1.13409	1.21675	0.610073	1.18687	1.3203	0.99729	1.03606	1.11128	1.33872	1.47028	1.08599	1.28112	1.64462	NaN	1.23913	0.932003	1.25194	1.5678	1.46182	1.44014	1.44717	1.44859	0.882765	1.24355	1.02737	1.0756	1.40062	1.38521	0.98076	1.07046	1.40689	0.910867	0.810573	1.31022
2	11.425	3	0	1.59579	1.48244	1.43255	1.22672	1.2255	1.19032	0.765576	0.537508	0.832432	1.09358	0.236164	0.729063	0.670333	0.946822	0.271369	0.394774	0.409818	0.640916	0.583757	0.507321	0.860196	0.688849	0.850016	0.981534	0.696528	NaN	0.890975	0.558303	1.29571	0.785316	1.56799	1.57134	0.94242	0.889331	1.12682	1.11075	1.621	1.58016	1.24586	0.875513	1.33357	1.09741	0.961017	0.750981	1.26381	0.911982
2	12.825	6	0	1.42874	1.35295	1.51297	1.12042	0.661472	1.05538	0.992235	1.33204	1.52671	1.09894	1.26474	0.853918	0.892382	1.04598	0.613801	0.898469	0.61452	0.846132	1.01804	1.30854	0.846592	1.24779	0.950417	0.959551	0.973297	NaN	0.902531	1.13334	0.835751	1.27333	1.4601	1.53324	1.01309	1.29634	0.986768	1.40448	1.43383	1.2157	1.27424	1.30724	1.14616	1.31447	0.941608	1.33195	0.815301	1.77282
2	14.15	7	1	0.474237	0.644805	0.634052	0.541352	0.548797	0.687074	0.86731	0.876503	1.17107	0.678183	1.77043	1.20642	0.986557	0.518166	0.525545	1.24083	0.817028	0.999953	0.630458	0.684804	0.837932	1.01801	0.691532	0.855596	0.756177	NaN	0.915901	0.403764	0.675627	0.87118	0.7419	0.478441	0.810907	0.833028	0.472839	0.87651	0.387693	0.494573	0.740375	0.583281	0.651287	0.402492	0.707984	1.02161	0.624547	1.05324
2	15.025	1.75	1	0.914803	0.688837	1.44026	1.11599	0.888867	0.769344	0.839778	0.904171	1.06352	1.18068	0.817409	0.842726	0.602202	0.989774	1.05188	0.704877	0.611985	0.691793	0.663001	1.14114	1.16293	0.670091	0.78474	0.832569	1.2247	NaN	0.561183	1.12474	0.894323	0.874834	0.984511	1.00067	0.602208	0.633461	1.09167	0.862707	0.887207	0.630801	0.589276	0.457006	0.477757	0.51149	1.06921	0.456183	1.10188	0.450323
2	15.75	2.16667	1	0.847464	1.04956	0.226828	0.415605	1.23379	1.39914	0.781031	0.649609	0.360619	0.406713	0.478287	0.58601	0.7981	0.564057	0.606938	0.465809	0.870697	0.667935	1.09442	0.619666	1.22173	0.950464	0.925597	0.753993	0.907461	NaN	0.353071	0.708801	1.10737	0.704951	0.418482	0.450105	0.685184	0.752273	0.708267	0.852194	0.603169	0.632455	0.807626	1.20815	1.11828	0.829436	0.70039	0.417118	0.529691	0.374852
2	16.55	4	0	0.568185	0.685795	0.48796	0.573368	0.533749	0.917552	0.515611	0.224167	0.315093	0.747972	0.887198	0.242093	0.930256	0.837598	0.473819	1.38245	1.15114	1.44222	1.28151	0.662748	0.885229	0.90208	0.940364	0.9421	0.615174	NaN	0.320979	0.52895	0.239145	0.589668	0.359121	0.593999	1.08311	0.967625	0.820943	0.852961	1.36533	1.21776	0.722219	0.93263	0.845479	0.867242	0.857512	0.500942	0.441829	0.427708
2	17.175	5	0	1.10115	1.0966	1.51746	1.29796	0.688138	0.554942	0.88919	0.892453	0.838556	0.79958	1.25568	1.00097	1.42835	1.18083	0.969215	1.0418	0.836144	1.31026	0.599401	0.934497	0.968029	0.842851	1.14298	1.05235	1.21139	NaN	0.392983	0.561426	0.486079	0.641843	0.73095	1.13515	1.13782	0.816498	0.732289	1.08841	1.11511	1.28149	1.48536	1.5825	1.15275	1.6169	1.20332	1.52823	1.2875	0.984151
2	19.5	3	0	0.62282	1.05394	0.84328	1.13473	0.861508	0.562648	0.100067	0.960708	0.404476	0.423013	0.891284	1.28758	0.609175	0.67496	1.16705	0.338267	1.16789	0.807896	0.740229	0.416402	0.988804	0.875031	1.16721	0.905174	0.804363	NaN	0.76323	0.69923	1.05166	0.990326	1.1489	0.569485	0.772097	0.754085	0.807755	0.754829	0.596955	0.537086	0.749871	1.21951	0.620568	0.899056	1.00599	0.457568	0.656544	0.831816
2	19.65	3	0	0.624415	0.725644	0.487881	0.608241	0.814679	0.313081	0.236512	0.380299	0.308124	0.219627	0.965762	1.20951	0.592462	0.560183	1.09449	0.535001	0.714394	0.46293	1.10114	0.695864	1.06156	0.81587	1.10289	0.747452	0.842619	NaN	0.440382	0.755766	0.70394	0.703078	0.791791	0.522819	0.932216	0.776095	0.781236	0.923363	0.593217	0.803123	0.840419	1.31263	0.784179	0.915971	0.640125	0.348478	0.787427	1.07694
2	20.2	1.5	1	1.24604	1.17611	1.00807	0.935077	0.892826	0.856761	0.179089	0.146945	0.170856	0.394083	0.256323	0.0846484	0.236473	0.139588	0.266685	0.389166	0.476834	0.683307	0.560485	0.683105	0.274828	0.295682	0.352231	0.539075	0.273151	NaN	0.232066	0.411193	0.0431193	0.13234	0.296793	0.71277	0.989875	0.755875	0.432945	0.781878	0.912726	0.838834	0.95514	0.841202	0.559211	1.15929	0.212907	0.416324	0.757197	0.536568
2	20.525	3.5	1	0.848824	0.900262	0.579809	1.19744	0.592252	0.712874	0.263052	1.12048	0.475533	0.367572	0.553701	0.420246	0.68256	0.994021	1.21788	0.371887	0.731093	0.457601	0.743468	0.823369	0.745514	0.602146	0.594829	0.580642	0.273045	NaN	0.831225	0.660395	0.542007	0.522377	0.518065	0.986662	0.80361	0.739959	0.830002	1.03168	0.953325	0.646538	0.664415	0.507859	0.847775	0.757289	0.961709	0.830982	0.780164	0.466339
2	21.125	3.16667	1	0.624465	0.708295	0.586534	0.722015	0.407516	0.740496	0.687374	1.61291	1.48045	1.32114	1.03784	0.861483	1.02009	1.53839	0.684388	1.51603	1.23188	1.52888	1.17165	0.867024	1.06911	1.25563	1.18889	1.21812	0.8904	NaN	1.51271	1.41003	1.40578	1.47392	0.520219	0.87447	0.912705	0.980259	1.04367	0.792757	0.496505	0.670499	0.843047	0.664461	0.539889	0.452197	1.21343	1.19886	0.799841	1.47563
2	23.25	2	0	1.23305	1.22147	1.24738	1.12387	1.3071	1.5246	1.29907	0.61139	1.2731	1.83478	1.04488	0.381465	0.730122	1.40092	0.504765	1.29313	0.7974	1.44754	0.62887	1.62334	0.54925	1.11689	0.866133	0.940691	0.756086	NaN	1.15184	1.18127	0.605687	0.677675	1.17582	0.962873	1.00588	1.41934	0.967159	1.16621	1.14732	0.970166	1.06513	1.04391	0.964129	1.10317	0.94893	1.44083	0.759395	1.01874
2	23.7	1.5	1	0.80447	0.790033	0.791023	0.869943	0.642675	0.865461	1.26368	1.60643	1.09832	0.901747	1.15618	0.864217	0.853464	1.1263	1.22724	0.928164	0.655796	0.570907	0.490763	0.697926	0.645786	0.799526	0.657846	0.791791	1.1595	NaN	0.806424	0.739331	1.15538	1.20218	1.60731	0.898299	0.78331	0.952776	0.559244	1.07273	0.324485	0.422102	0.285264	0.552729	0.531613	0.449152	0.932726	0.980736	0.339345	1.35953
3	1.55	3	1	0.815771	0.941214	0.631942	0.538705	1.10801	0.864105	1.16068	0.877095	0.850915	1.61182	1.5106	1.16261	1.28598	1.19993	1.51141	1.44909	1.45159	0.807168	1.20462	1.16172	1.30527	0.869203	1.02629	1.00474	NaN	NaN	1.16193	0.998872	1.21742	1.46843	1.09642	0.810232	1.4637	1.04193	1.47894	1.21765	0.720068	0.787149	1.39503	1.08189	0.839699	0.8121	0.863794	1.13262	1.10221	0.676182
3	1.775	4	1	1.24456	1.12556	0.507162	0.994357	1.49194	1.43442	1.26135	1.52268	1.23998	0.961976	1.02215	0.92627	1.07912	0.774672	1.06866	0.963706	1.07128	1.2434	1.58752	1.04113	1.63708	1.08315	1.22955	1.2158	NaN	NaN	1.35129	1.36791	0.513359	0.995182	0.949024	1.21058	1.2264	1.1548	1.32524	1.01363	1.23044	1.18651	1.12502	1.00983	1.40787	1.26891	1.17861	1.00286	1.09742	1.10736
3	2.6	2	0	0.669418	0.880272	0.560965	0.838973	0.678503	0.936932	0.595195	0.514966	0.794186	1.31709	0.673641	0.711348	0.498136	1.22106	1.18363	0.787331	0.937002	0.410939	0.854987	0.77533	0.864154	0.699434	1.13419	0.820029	NaN	NaN	1.31098	0.91146	1.21281	1.16396	0.82566	0.864396	0.663536	0.632037	0.610797	0.876897	0.932408	0.954157	0.473879	0.45626	0.881034	0.491441	1.07923	0.708841	1.20968	0.589106
3	3.2	7	1	0.864415	0.901201	0.615489	0.758385	0.81063	1.24532	1.52475	1.07622	1.2162	1.25984	1.45594	1.02828	1.33948	1.29965	1.14817	1.25739	1.41386	1.37843	1.12705	1.19961	1.10675	1.08905	1.07651	0.977465	NaN	NaN	1.20212	1.28371	1.48545	1.31339	1.35035	1.24249	1.07182	0.702095	1.16978	0.692596	0.831398	0.759169	1.00909	0.940861	1.30216	1.04302	0.935896	0.66974	1.37181	0.49789
3	4.875	4	1	1.08458	1.22435	1.22876	1.09015	0.73616	1.13082	0.519127	0.297103	0.644968	1.03279	1.18291	0.972645	0.924763	0.743076	0.922307	0.695182	0.753673	0.67002	0.476347	0.768963	0.96726	0.706781	0.856058	0.889684	NaN	NaN	1.24184	1.33779	0.536552	0.846005	1.0707	0.839705	1.01322	1.0274	1.00234	0.678077	1.15813	0.987755	0.761736	0.587592	1.15209	1.10337	0.936248	0.872835	0.989303	0.858848
3	5.6	2	1	0.995185	1.2236	1.10422	1.02429	0.818355	1.28205	0.771619	0.852613	0.939906	1.12151	0.838631	0.961726	1.07752	0.631041	0.518113	0.963282	1.2094	1.22737	0.575859	0.914044	1.05451	0.917241	0.910432	0.739645	NaN	NaN	0.985497	0.665957	0.467591	0.674374	0.843973	0.368924	0.707746	0.788786	0.734986	0.608992	0.846885	0.859846	0.827234	1.15858	0.63968	0.967107	0.894279	0.670282	0.759556	0.55462
3	6.45	6	1	0.969503	0.745957	0.887806	1.45186	0.746144	0.940574	0.800896	0.567831	1.05805	0.652678	0.218151	0.366396	0.446333	0.450772	0.263284	0.550825	0.481441	0.496892	0.6873	0.620848	0.657635	0.540318	0.626845	0.761985	NaN	NaN	1.03062	0.630645	0.28655	0.251494	0.640538	0.524877	0.905038	0.686967	0.592262	0.895225	0.547407	0.781968	1.00058	0.957655	0.634409	0.587869	0.808811	1.01807	0.853091	0.938487
3	10	1	1	1.08675	1.08923	1.41983	0.954842	1.37714	1.18726	0.883195	1.15425	0.976051	1.11748	1.07791	1.49383	1.10985	0.862222	0.63407	0.772599	0.531198	0.598243	0.760709	0.620554	0.843049	0.83068	0.651834	0.710586	NaN	NaN	0.889135	1.32577	0.967056	1.13601	1.38175	1.25203	0.986924	0.920818	1.1879	1.01819	1.18391	0.859844	0.895539	0.881599	0.988121	0.937667	0.714983	0.642692	0.655379	1.02879
3	10.2	5	1	1.4887	1.23182	1.05509	1.05759	1.48154	1.03564	1.11818	1.14804	0.882206	1.35201	1.41205	1.34556	1.41735	1.03442	1.42112	0.66668	0.959488	1.50859	0.95514	0.798129	1.07924	0.860264	1.1156	0.987001	NaN	NaN	1.48834	1.24327	0.853166	1.0319	1.42165	1.23422	1.0179	0.876091	1.04019	0.959864	1.36083	1.32108	1.28828	0.74852	1.51156	1.08081	0.968132	0.670981	1.07244	0.969466
3	10.75	4	0	1.08251	0.996408	1.35917	1.05218	1.11497	0.97152	0.881574	1.00146	0.992889	0.786188	0.67672	1.24358	1.08631	0.980439	1.56076	0.819858	1.14861	0.733666	1.2278	0.902688	0.96924	0.732847	1.06541	1.15116	NaN	NaN	0.725987	0.82183	0.828251	0.822287	0.987213	0.95803	0.878813	0.818682	0.89005	0.930543	0.761908	0.73517	1.1158	0.817054	1.07814	0.892054	1.30298	0.880613	0.772696	0.56272
3	11.425	3	1	0.776293	0.830447	0.375623	0.883552	0.921394	1.19273	1.23684	1.2787	1.10541	0.876823	0.594334	0.564994	1.12317	1.00241	1.10617	0.930908	1.26912	0.906039	1.35833	1.22033	1.04405	0.968936	1.09198	1.23636	NaN	NaN	0.682443	1.0078	0.657721	0.602222	0.472647	0.459661	0.974165	0.892426	1.13217	1.11719	1.01138	0.807122	1.49701	1.11795	0.807635	0.940812	1.09539	1.05318	1.2049	1.43019
3	12.825	0.5	1	0.90385	1.1476	1.4562	1.5173	1.03957	1.07199	0.452843	0.725935	0.407279	0.868204	0.525211	1.179	0.458473	0.459225	0.806159	0.362012	0.542903	0.448939	0.734839	1.06834	0.518204	0.725114	0.651511	0.571864	NaN	NaN	0.698549	0.936826	1.17001	0.757251	0.934324	0.794233	0.903148	0.817106	0.667728	0.727384	0.903035	1.1266	0.827746	0.518587	0.670504	0.682811	0.673801	0.637717	0.836829	0.521055
3	14.15	4	1	0.985353	1.14273	1.51995	1.41858	1.51033	1.11367	1.24741	1.27849	1.15637	1.37834	1.43868	1.23835	1.41889	1.30087	1.19866	1.4127	1.21505	0.732778	1.40875	1.08737	1.13047	0.919792	1.08005	1.07305	NaN	NaN	1.46695	1.18083	1.38084	1.38857	1.57492	1.6433	1.28115	1.38154	1.28002	1.43434	1.51488	1.41826	1.07901	0.863907	1.41103	1.03676	0.825317	0.940161	1.25838	0.840735
3	15.025	2	0	1.09946	1.2307	0.9027	1.15456	1.19503	1.28772	1.20598	1.20503	1.08204	0.989556	0.988557	0.807312	1.25113	1.10339	1.23134	0.971472	1.40944	1.07476	1.28656	1.42522	1.25243	1.13968	1.05459	1.11346	NaN	NaN	1.40941	1.50275	1.05065	1.27362	1.07491	1.40998	0.957433	1.23831	0.580927	1.43498	0.773309	0.977408	1.07998	0.878717	0.918921	1.40093	0.743042	1.32464	1.20206	1.56839
3	15.75	2	1	0.905975	0.572955	1.01627	1.11282	0.694579	0.595676	0.764597	1.13595	0.517543	1.20264	0.846598	0.576534	0.866216	0.919522	0.49706	1.00485	0.959746	1.13416	0.930985	1.32214	1.0595	1.07226	0.841478	1.07292	NaN	NaN	0.537041	0.747284	0.679308	0.807537	0.607473	0.445718	0.970332	1.01223	0.678726	0.996004	0.317832	0.552066	1.05352	0.934813	0.90914	1.25435	0.95082	1.08624	0.594132	1.46186
3	16.55	1	1	1.22963	1.20534	1.63731	1.67458	1.19456	0.794738	0.991444	0.878422	1.25723	0.720625	0.964873	1.05211	1.03622	0.959958	1.20471	0.843575	1.26251	1.41159	1.39395	1.40847	1.48097	1.48365	1.22075	1.30542	NaN	NaN	0.921118	1.05838	0.736712	0.870204	0.829346	0.51671	1.01799	1.12948	0.730003	1.19003	1.37922	0.955244	0.657387	1.14492	1.31392	1.42828	0.98779	1.13483	0.844447	0.618943
3	17.175	1	1	1.42839	1.0926	1.46235	0.723885	0.893924	1.29447	1.00208	1.26874	0.650814	0.415879	0.613085	0.628234	0.982897	0.460385	1.12378	0.471232	1.37342	1.40298	1.30055	1.00489	1.15401	1.13346	1.36165	1.23989	NaN	NaN	0.518579	1.19953	0.672467	0.612026	0.576486	0.837507	0.876778	1.28195	0.857284	1.32105	0.748647	0.946426	1.29974	0.946168	1.36981	1.07426	1.50714	1.06061	0.873655	1.03706
3	19.5	1	1	1.43418	1.25697	1.15346	1.13955	1.21464	1.02385	0.901361	1.12501	1.41247	1.05123	1.1049	1.18778	1.07991	1.17047	0.96338	1.6627	0.703583	1.12388	0.76017	1.0538	1.19931	1.25842	0.832745	1.07667	NaN	NaN	0.660479	0.716474	1.06987	1.50119	1.05979	1.09102	1.09663	1.13242	0.955869	1.29149	1.0948	1.14536	1.02149	1.16227	1.07939	1.31549	1.06315	0.650181	0.806001	0.593897
3	19.65	2	1	1.45113	1.1456	1.55548	1.22603	1.39548	1.07563	1.12244	1.09467	1.34136	1.16531	1.19621	1.03162	1.35616	1.47581	1.34284	1.60568	1.29524	1.13009	1.34962	1.16592	0.814667	1.1689	1.54976	1.42612	NaN	NaN	1.60881	0.847978	1.10268	1.36624	0.932345	1.21911	0.907552	1.05576	0.771365	1.1645	1.17426	1.34606	1.06673	1.17423	1.37232	1.39229	1.33903	1.14609	1.07575	1.20007
3	20.2	2	1	1.02873	1.28368	1.38949	1.27271	0.840514	1.06448	1.28822	1.14272	1.4358	1.05563	1.28556	1.26725	1.05666	1.11368	0.76959	0.92943	1.10636	1.54554	1.23424	1.22207	0.888498	1.1988	0.950634	1.03873	NaN	NaN	0.977688	0.771916	1.26299	1.08906	0.897175	1.1101	0.546427	0.72235	0.644469	0.820376	0.857237	0.897682	1.09476	1.21585	0.989381	1.10603	1.1569	1.36401	1.22421	1.54628
3	20.525	0.5	1	0.93029	1.16584	0.974784	0.744443	0.974265	0.746689	0.814547	0.514186	1.10921	0.862794	1.01668	0.809778	0.757054	0.536388	0.694356	0.584706	1.19989	0.585787	1.0972	0.637048	1.01551	0.733866	0.604266	0.697404	NaN	NaN	0.717562	0.824387	1.06168	0.651437	1.02229	0.771099	0.913541	0.855299	0.664437	0.867719	1.48857	0.783237	1.04959	0.586505	0.757149	0.97584	0.583275	0.816384	0.852143	0.723373
3	21.125	1	1	1.05165	0.825591	1.71969	1.40145	0.79648	0.554423	0.876292	1.0082	1.31017	0.473	1.33062	0.924796	1.16636	1.30899	0.925436	1.2573	1.47977	1.12683	0.65647	1.03852	1.47652	1.03636	1.10597	0.96496	NaN	NaN	1.3547	1.15309	0.81784	1.19243	0.797318	1.22305	0.940523	0.924905	0.780396	0.952081	0.845395	0.716845	1.18789	1.22046	1.53988	1.33039	1.327	1.099	1.06495	1.17523
3	23.25	2	1	1.17941	1.10544	1.02052	1.28731	0.690598	1.04717	1.23793	1.16482	0.541546	1.41889	1.04207	0.873711	0.998785	0.860499	0.894244	1.37312	0.964269	0.880914	1.38645	1.05667	1.33937	1.13269	1.15053	0.963756	NaN	NaN	0.909841	1.07497	0.999954	0.977147	1.23037	1.00061	1.02849	0.720378	1.00179	0.943598	1.44434	1.1177	1.29479	1.14448	1.19298	1.18258	0.840268	0.509919	1.12937	1.06725
3	23.7	0.166667	1	0.50259	0.959842	0.674747	1.07348	1.11627	0.806054	1.34435	1.49452	1.30065	0.506483	0.746447	1.48609	0.994299	0.927018	1.46875	0.979954	0.532367	0.84112	0.899378	1.01247	0.64352	1.08482	0.777869	0.96578	NaN	NaN	1.09943	0.853027	1.10201	1.38681	1.1055	0.979518	0.548885	0.891397	0.905866	0.967448	0.324597	0.631929	0.620035	0.864828	0.337048	0.782793	0.887494	0.730117	0.519408	0.848748
4	1.55	4	1	1.01333	1.2056	1.25079	1.33958	0.913708	0.795433	1.22523	1.64885	1.32286	1.41212	1.50643	1.35726	1.6631	1.7638	1.82995	1.73403	1.52419	1.70671	1.29196	1.11042	1.31443	1.4299	1.47468	1.30188	NaN	1.81348	1.46849	0.957544	1.24919	1.07397	1.00737	1.4442	1.50337	1.43004	1.43552	1.6175	1.37096	1.61898	1.48104	1.34027	1.47544	1.55901	1.49267	1.54128	1.29953	1.53324
4	1.775	4	0	1.26171	1.57831	0.801661	1.05742	1.40149	1.42739	1.44265	1.55976	1.17342	1.19426	1.85254	1.6925	1.44145	1.71645	1.77215	1.74163	1.10715	1.3624	1.03084	1.56671	1.53793	1.42715	1.45218	1.46516	NaN	1.25882	1.72516	1.27347	1.70509	1.40321	1.58611	1.60121	1.14917	1.56408	1.35938	1.67956	1.55491	1.70437	1.06688	1.47767	1.34513	1.61482	1.44525	1.66048	0.844407	1.17507
4	2.6	3	1	1.10025	1.12496	1.12966	1.27886	0.941873	0.591649	1.37343	1.32936	1.07285	1.60584	1.17978	1.2293	1.27093	1.50708	1.34693	1.58556	0.679449	1.51566	1.14458	0.791077	1.11561	1.0967	1.12799	1.11115	NaN	0.925964	1.31223	1.26078	0.546563	0.591828	1.3159	1.16311	1.38441	0.740254	1.23906	0.863476	1.36608	1.32383	1.41816	1.02222	1.19307	1.00391	1.10981	1.41371	1.59508	0.576017
4	3.2	5	0	1.33602	1.05403	1.51237	1.38489	0.953054	1.53801	0.283515	1.28472	1.26006	1.30978	0.487596	0.624576	0.955446	0.643875	0.470254	0.585879	0.517696	0.644878	0.69354	0.919373	0.835207	0.792845	0.88572	1.26557	NaN	0.884296	1.34186	1.20722	1.10067	0.904334	1.08876	1.49357	0.976675	1.04875	0.9139	1.08729	1.27642	1.28665	0.714679	0.606945	1.2304	1.33502	0.777181	1.25065	0.869667	1.09044
4	4.875	3	0	0.714172	1.09129	1.44704	0.404566	1.56256	1.60408	0.631065	1.56058	1.11296	0.544766	0.659848	1.15364	0.555477	1.02413	0.640337	1.10891	0.46893	0.961894	0.834673	1.14794	1.19638	1.48461	1.05253	1.11684	NaN	0.960199	1.09115	1.70605	0.530567	0.927411	0.819077	1.20998	0.765456	1.15958	0.53714	1.16671	0.49504	0.328363	1.27475	1.18083	0.969768	1.10234	0.701692	0.984625	0.595275	1.35954
4	5.6	2	0	0.457274	0.607219	0.570772	0.343382	0.386686	0.688229	0.980405	0.904335	1.05121	0.776456	0.352206	0.996542	0.374633	1.18587	0.63024	0.810651	0.573523	1.16957	0.694873	0.453421	0.678771	1.00543	0.517092	0.535837	NaN	1.17657	0.658296	0.743756	0.546298	0.921339	0.745096	0.878365	0.848866	0.803077	0.985181	0.776474	0.787028	0.8622	0.5095	0.609946	0.530367	0.707016	0.796942	1.23228	0.855212	1.44708
4	6.45	3	1	0.949194	1.38515	1.10987	1.65953	1.00748	0.988679	1.08842	1.46828	0.747931	1.02374	1.43691	1.60516	1.46266	1.37919	1.57626	1.62497	1.64689	1.60693	1.09363	0.961813	1.0892	1.34231	1.20781	1.09687	NaN	1.70758	0.705039	0.997503	0.931056	1.60339	1.20257	1.46604	1.12821	1.03682	1.27292	1.3557	1.32315	1.30884	1.06646	1.10615	1.13278	1.09638	0.949966	1.18989	1.37529	1.61944
4	10	3	0	1.23948	1.05618	1.16779	1.13095	1.20852	1.32249	1.30913	1.32793	1.29631	1.24258	1.2415	1.48728	0.842612	1.41363	1.05082	1.57482	1.11246	1.11787	1.39508	1.1756	1.34915	1.4267	1.16574	1.12916	NaN	1.78149	0.640314	0.61302	1.34511	1.1278	1.41822	1.30607	0.959368	0.985571	1.36635	1.2801	1.09587	1.23394	1.0694	0.945171	1.11773	1.09377	1.1238	0.986764	0.943536	0.84755
4	10.2	5	0	0.958416	1.02702	0.706436	1.20693	1.25704	1.26103	1.45743	1.36871	1.4965	1.50904	1.42031	1.11471	1.12745	1.21069	1.57755	0.979814	1.35643	0.989051	0.517025	1.21879	1.05452	0.975523	1.00297	1.14931	NaN	1.41563	1.20297	1.37278	1.58117	1.2699	1.13122	1.48388	0.850642	1.08068	1.00622	1.20708	1.31215	1.25393	1.20246	1.50036	1.14299	0.948679	1.02539	0.940132	1.01158	0.987806
4	10.75	4	1	0.804397	0.554254	1.12526	1.32271	0.903312	0.549253	1.40688	0.43386	0.974038	0.767438	0.578524	0.623613	0.722362	0.606886	0.544572	0.742113	0.842666	0.293589	0.541251	0.529074	0.931357	0.482809	0.754065	0.734097	NaN	0.799257	0.844323	0.795234	1.1966	0.973783	1.02209	1.0901	1.22235	0.835751	1.08101	0.926939	0.930526	0.337173	1.07488	0.702912	0.81598	0.539586	0.905546	0.437119	1.27691	0.546977
4	11.425	2	0	0.877938	0.608401	0.692771	1.25628	0.585414	0.866491	1.13958	1.10132	0.988069	0.911299	1.30728	1.33485	0.792776	0.99672	0.864453	1.15912	1.02356	1.07389	0.637037	1.068	0.782987	0.975026	0.819855	1.01512	NaN	1.05599	1.02666	1.20225	1.1929	0.949832	1.32906	1.34371	0.92933	1.13299	1.24485	1.2238	0.723186	0.672419	0.710373	0.762076	0.882168	0.729946	1.01077	0.742598	0.610876	1.09463
4	12.825	2	0	0.657043	0.853931	1.129	1.60513	0.931355	1.12825	0.997622	0.709201	0.726015	0.868027	0.682586	0.85114	0.71205	0.831315	1.1401	1.11684	0.792014	0.723189	0.807832	1.10099	0.759155	0.848169	0.595409	0.856127	NaN	1.12973	0.900207	0.90104	0.842877	0.523261	0.941661	0.838271	0.825201	0.93809	0.806732	0.857855	0.868044	1.09118	0.918448	0.707316	0.907659	0.892575	0.958544	0.857837	0.462376	0.877886
4	14.15	4	1	0.34923	0.280796	0.315323	0.339823	0.340147	0.268123	0.251386	0.367141	0.565527	0.550446	0.888174	0.819434	1.27042	1.19229	1.05001	0.904424	0.586911	0.985012	0.505758	0.192998	0.443217	0.440728	0.434876	0.383682	NaN	0.696144	0.709859	0.445387	0.326026	0.828858	0.456593	1.11622	0.777185	0.649103	0.963044	0.766058	0.576177	0.523303	0.665184	0.904828	0.317386	0.26453	0.536082	0.834238	0.296085	0.223351
4	15.025	2	1	0.653987	0.820177	0.457724	0.410845	0.982782	1.1486	0.38138	0.766505	0.698544	0.310399	0.877306	0.778831	1.25879	1.15373	0.750489	0.992562	1.52534	1.37976	0.830402	1.24047	1.04761	0.788763	1.0951	1.12462	NaN	1.24852	0.803495	1.10653	0.908768	1.18679	0.63265	1.05621	0.780671	1.15604	0.823572	0.847149	0.520088	0.95337	1.24425	1.28807	0.702051	0.854644	0.998654	0.842259	0.991858	1.46696
4	15.75	1	1	0.766784	0.875072	0.769912	0.709524	1.24123	1.2317	1.25629	1.03937	0.968924	1.3492	1.01963	0.855957	0.855923	1.10005	1.50437	0.761891	0.854374	0.807102	1.13947	1.53357	1.17513	1.11092	1.30183	1.46571	NaN	1.46014	1.53044	0.955395	0.987422	1.18753	1.29096	1.05877	1.1298	1.52101	1.09621	1.38834	1.27154	1.57551	1.4276	1.08631	0.982941	1.43419	0.919879	1.14788	1.26784	0.770446
4	16.55	2	1	1.36589	1.03749	1.34781	1.11321	1.37704	0.97757	1.14843	1.1908	0.744253	1.33221	1.28519	1.05161	1.09302	1.38052	0.97109	1.14896	1.3168	1.04646	0.97495	0.718524	1.33029	0.795593	1.0094	0.909347	NaN	1.08029	0.759311	0.97614	1.53299	1.2814	1.15688	1.21429	1.35623	1.35333	1.26097	1.40129	0.812239	1.1517	1.17734	1.26655	1.44729	1.17289	1.0541	1.40794	1.03806	1.45224
4	17.175	2	1	1.50658	1.38257	1.46168	1.66735	1.04452	0.813792	1.42553	1.23954	0.784029	1.12833	0.94451	1.06677	1.24811	1.27859	0.800452	0.721444	1.29102	1.14316	1.09894	0.991542	0.771645	1.2318	1.03118	1.16851	NaN	1.08218	0.457411	0.755315	0.468168	0.795724	1.21627	0.976686	0.956236	0.849018	1.06158	0.929111	0.844502	1.08831	1.05533	0.657007	1.10934	1.0286	1.10532	1.32018	0.953717	1.44864
4	19.5	3	1	1.39333	1.15465	0.979713	0.57842	1.14754	0.858344	0.670069	0.980766	0.670579	0.769075	0.494602	0.469814	0.759546	0.521406	0.840046	0.760624	0.794342	0.526733	1.4273	0.728191	0.878035	0.604484	1.30564	1.1235	NaN	0.453701	1.55848	1.50454	0.378998	0.558969	0.716772	0.619609	0.843312	0.60629	0.754123	0.755236	0.88037	0.590329	1.32665	0.551608	0.925451	0.620353	0.746635	0.822667	0.502615	0.649698
4	19.65	4	1	0.937859	1.16873	0.9722	0.659809	1.31389	1.13946	0.406181	0.94553	0.453187	0.443305	0.24583	0.341017	0.422941	0.381769	0.322356	0.51055	0.730006	0.384113	0.52727	1.03509	0.74559	0.680896	0.653426	0.650249	NaN	0.243581	1.54119	0.741752	0.663658	1.06959	0.433416	0.744974	0.706158	0.556389	0.721804	0.526598	1.10465	0.74892	0.589098	0.706486	0.782308	0.593974	0.633186	0.614643	1.16659	0.632771
4	20.2	3	1	0.530525	0.502211	0.864153	0.623801	1.01813	0.998261	1.2928	1.15216	0.763248	1.04956	1.4752	1.35278	1.26059	1.07353	0.782714	0.582173	1.36121	0.659729	1.15627	0.754972	0.931035	0.710624	0.592063	0.712001	NaN	1.39123	0.709348	0.778681	1.4376	1.37996	0.739467	0.627891	0.484328	0.735072	0.603434	1.01252	0.721443	0.722982	0.967593	0.77305	1.02156	0.838761	0.640098	0.641676	1.06314	0.860206
4	20.525	2	1	0.851179	1.0538	1.24062	1.38123	1.11524	1.13781	0.981278	0.743899	0.711055	1.2987	1.41429	1.25721	0.771195	1.0446	0.937483	1.0427	0.802469	0.994313	0.40922	0.531974	0.63135	0.447598	0.596777	0.625739	NaN	0.932888	1.3874	0.75978	1.32939	1.19301	1.45555	1.0769	0.545576	0.625687	0.985841	1.0653	0.656746	0.733534	0.669112	0.691662	0.620391	0.782771	0.668042	0.865575	0.238109	0.330657
4	21.125	2	1	0.520322	0.506994	0.745721	0.414168	0.840457	1.31837	1.06123	0.822558	0.946361	0.760856	0.978915	0.856998	0.784675	1.00655	0.731711	0.321063	0.658867	0.479438	0.967542	0.335294	0.791485	0.469654	0.946775	0.583593	NaN	0.709041	1.6217	0.991602	0.588434	1.41918	0.552646	0.341661	0.715464	0.72385	0.78554	0.908507	1.03563	0.416668	1.11632	1.23902	0.81213	0.72082	1.14565	1.07763	1.28552	1.24782
4	23.25	1	1	1.41373	1.38411	0.965961	1.27994	1.16473	1.19534	0.691021	1.06779	1.16075	1.2672	1.17781	1.04199	1.26148	1.27275	1.20586	1.06151	1.21381	1.23761	1.04901	1.13136	1.36539	1.23944	1.08673	1.14965	NaN	1.14509	0.801009	1.29665	0.772197	1.32028	1.19133	1.11249	1.11022	0.850063	1.01068	1.10536	1.42622	1.59834	1.40296	1.16779	1.43175	1.23906	0.978217	1.02822	1.41326	1.62708
4	23.7	1	1	1.0923	0.908289	1.22258	1.57665	0.589497	0.560005	1.14237	1.49981	1.12358	1.07192	0.607677	1.29669	0.942372	0.675881	1.17856	0.758566	0.781816	0.708593	0.950272	1.35014	0.543756	0.596731	0.736346	1.06103	NaN	1.50999	0.42946	0.872661	0.630144	1.1099	0.674166	0.646144	0.783803	1.07255	1.21996	1.35911	0.525642	0.61693	0.725407	0.659406	1.15443	1.22936	1.20721	0.998703	1.43607	0.882699
5	1.55	4.05	0	0.80463	0.479499	0.65375	0.797966	1.35461	0.635884	1.2845	0.972733	0.769705	0.598703	0.882906	0.984565	1.00441	0.79075	0.959523	0.973725	1.09211	0.897845	1.31327	0.921719	0.910858	0.620126	0.93374	0.927801	NaN	0.658607	0.853883	1.18569	1.30287	0.737882	0.952543	0.995357	0.83177	1.20918	0.884963	0.72696	0.490101	0.598712	1.3215	1.33334	0.743938	0.364182	0.733976	0.649932	0.331892	0.342398
5	1.775	1.5	0	1.21574	0.493343	0.900239	0.899958	1.44411	1.44274	1.23106	1.19298	1.47165	1.68418	1.31999	1.16849	1.31209	1.31832	0.424637	1.13488	0.802353	0.98304	0.946152	0.617192	0.987985	0.840366	1.20957	1.24151	NaN	0.95451	1.0358	0.705542	1.3125	1.32958	1.37398	1.33952	1.35728	1.23219	1.46783	1.00302	0.790526	0.338734	1.12534	0.689863	1.19037	0.638655	0.866596	0.995324	0.631119	0.471473
5	2.6	3	0	1.05485	1.17134	0.841769	0.882203	1.21736	1.18916	1.25165	1.64717	1.26504	1.0892	1.31023	0.885313	1.0025	1.15741	0.911516	0.7039	1.28181	1.39321	0.880839	1.15061	1.08864	1.21923	1.02224	1.08623	NaN	1.24869	0.694727	1.0299	1.22561	0.741463	0.880211	0.698183	0.922879	0.851967	0.774571	0.757221	0.745293	0.835947	0.963982	1.0504	0.897286	1.46352	1.13434	1.17933	1.46635	0.484822
5	3.2	8	0	1.0159	0.753986	0.97392	0.568179	0.729689	0.701793	1.27011	1.37725	0.820583	1.47381	0.896345	0.952422	1.37929	1.45341	1.14785	0.543574	0.92009	0.750448	1.28994	1.13158	1.24177	1.10062	1.0901	1.14811	NaN	0.873811	0.553667	1.09478	1.19687	1.22397	0.815636	0.726714	1.05988	0.908643	0.861035	1.08357	0.99434	0.857471	1.11747	1.0012	1.29881	1.37991	1.04275	1.20023	1.08656	1.08931
5	4.875	5	0	1.11453	1.36733	0.729958	0.995268	0.95183	0.855447	1.20755	0.542578	0.597873	1.03378	0.547201	0.420998	0.394751	0.599463	0.389579	0.50749	1.01351	0.967453	0.783617	1.26732	0.986639	1.05013	1.21928	1.0702	NaN	0.195306	0.87485	1.15615	0.632681	0.453698	1.11711	0.736125	0.778257	1.03109	0.730459	1.15185	1.02892	1.40655	1.07232	1.413	0.675387	0.853272	0.786291	1.06114	0.460234	0.902763
5	5.6	3	0	0.637762	0.450593	0.508838	0.851114	1.06975	0.625819	0.693008	0.535461	1.11007	1.09891	0.439565	0.384538	0.253664	0.360314	0.294121	0.451415	0.611136	0.604566	0.901752	0.934634	0.653948	0.602009	0.64618	0.670917	NaN	0.391344	0.688053	0.868193	0.383433	0.366566	0.71851	0.696048	1.11343	0.986387	0.863809	0.487274	0.524478	0.526198	1.07087	0.646121	0.752232	0.64277	0.649191	0.511113	0.69817	0.634116
5	6.45	1.5	0	1.25475	0.655296	0.931141	1.0159	0.948311	0.638546	1.14575	0.364737	0.776982	1.71069	0.56873	1.07818	0.700041	0.687687	0.393865	0.858889	0.707477	0.987704	1.29179	1.33972	1.0111	0.739814	1.37492	1.38294	NaN	0.482812	1.32857	1.4987	1.10964	1.33983	1.2044	0.887259	1.29563	1.32505	1.4037	1.07899	1.12194	0.669084	1.3716	1.05953	1.21564	0.841697	0.873957	0.871929	1.24958	1.06403
5	10	0.75	0	0.931955	1.25111	0.692398	1.32192	0.943675	0.944085	0.376464	0.352688	0.166664	0.45261	0.365377	0.354166	0.486456	0.357119	0.905725	0.13554	0.633092	0.388872	0.419311	0.491547	0.698933	0.664409	0.491227	0.577079	NaN	1.48136	1.07788	0.44056	1.05358	0.663527	0.470152	1.05995	0.553363	0.469869	0.557825	0.452862	0.554536	0.85731	0.707015	0.297569	0.675265	0.343382	0.694548	0.414205	0.130585	0.550942
5	10.2	2.25	1	1.06612	1.27015	0.653154	0.669827	0.926252	1.07887	0.774715	0.325331	0.268809	0.505517	0.433642	0.366093	0.914351	0.504692	0.903406	0.168453	0.756691	0.760227	0.980467	0.745027	0.985936	0.814529	0.574616	0.576222	NaN	1.47266	0.844461	0.354345	0.978307	0.700266	0.767811	1.207	0.939109	0.569064	0.714421	0.82062	1.20264	1.11168	0.780072	0.690294	0.735482	0.796596	0.867084	0.370211	0.750257	0.570526
5	10.75	2	1	0.525008	0.732074	0.857404	0.73559	0.352885	0.325189	0.877134	1.25491	1.31715	1.00229	1.29396	0.906529	1.47507	0.977502	1.5643	1.24494	1.47556	1.06145	0.933246	0.978714	1.03691	0.945754	0.934885	0.947182	NaN	0.361306	1.36937	0.567547	1.01537	0.768107	0.920884	0.615885	0.801037	0.749945	0.792888	0.732625	0.631347	1.01461	0.72031	0.567643	0.529993	0.709453	0.975369	0.682362	0.485498	0.590859
5	11.425	2	0	0.989139	0.934756	0.508534	0.703335	1.0363	0.975273	0.400663	1.01902	1.09686	0.990045	0.806599	0.452103	1.00434	0.695413	0.89354	0.53022	0.834339	1.05385	0.768291	1.23924	0.890231	0.731895	0.769532	0.738654	NaN	0.535439	0.806896	1.16223	0.71171	0.771896	0.792846	0.560302	0.833924	0.913852	0.642421	0.852201	0.465967	0.571694	0.985035	1.22612	0.758678	1.02873	1.11622	0.78494	0.97421	0.639211
5	12.825	1	1	0.91704	0.922025	1.11123	1.39245	1.51165	1.14817	1.14824	0.936425	0.498477	1.35518	0.406895	1.23936	0.347988	0.887505	0.511675	0.941006	0.863069	1.07825	1.38097	0.946239	0.74291	0.897441	0.854754	1.11329	NaN	0.23677	1.21656	1.54116	0.929149	1.38131	1.0493	0.855234	1.32786	1.24521	1.20754	1.38349	0.7419	0.664792	1.31289	1.28471	1.07095	1.07248	1.03278	1.31105	1.10928	1.03588
5	14.15	9	1	0.730294	0.728609	0.674181	0.741986	1.07701	1.15441	0.518669	0.785539	0.584694	0.941912	0.509439	0.709948	0.72145	0.646868	0.795179	0.829919	0.789037	0.845855	0.82578	1.05859	0.880699	1.02842	0.6984	0.643755	NaN	0.234682	0.777876	0.567789	0.880965	0.81837	0.895308	0.91416	0.84845	1.1723	1.02948	1.26166	0.726605	0.878679	1.0494	1.31451	0.354331	0.551805	0.808844	1.05287	0.532084	1.15466
5	15.025	1.5	1	0.909417	0.472141	0.786462	1.09607	0.860626	0.46983	0.45747	0.315591	0.867824	0.866773	0.271005	0.307825	0.555387	0.616987	0.609245	0.299282	0.41301	0.456338	0.648949	0.701516	0.658098	0.718878	0.652616	0.461613	NaN	0.342424	0.877783	0.368227	0.332112	0.412712	0.410447	0.310548	0.333746	0.372245	0.300652	0.481527	0.576986	0.689575	0.724135	0.419798	1.01839	0.686967	0.56219	0.387223	0.730194	0.405216
5	15.75	2	1	1.22977	1.24428	1.43892	1.24525	1.22972	1.2133	0.432981	0.30627	0.413447	0.697865	0.194544	0.212096	0.51736	0.448329	0.287039	0.455519	0.344366	0.510998	0.348713	0.823412	0.575172	0.806589	0.564627	0.614615	NaN	0.234553	0.635679	0.639447	0.569672	0.87287	1.49177	0.668581	0.61715	0.698965	0.684764	0.56519	1.011	1.15587	0.879897	0.92015	1.37045	0.865187	0.747615	0.600203	1.50605	1.34322
5	16.55	3	1	1.25625	0.899591	1.06159	0.798404	1.31691	1.20762	0.691495	0.3809	1.02549	0.670827	0.566261	0.187658	0.46809	0.663796	0.716406	0.420892	0.580265	0.594115	0.518276	1.16004	0.984543	0.949868	0.984721	0.989091	NaN	0.440462	0.736585	0.78972	0.753641	0.976164	0.939478	0.730844	0.257796	0.767672	0.208545	0.475694	0.636547	1.0698	0.798771	0.940326	1.29439	0.984921	0.561208	0.808784	0.672735	0.961423
5	17.175	2	1	1.10678	1.40251	0.841631	1.21955	0.79046	0.644109	0.65364	0.951242	1.21911	0.879357	1.11119	0.600177	0.479697	0.74387	0.474713	1.10046	0.289421	0.566427	0.932746	0.829095	0.561053	0.620474	0.919669	0.817331	NaN	1.27504	0.811362	1.19015	1.24053	0.816363	0.622931	1.21026	0.86652	0.896039	0.8035	0.670909	0.93786	1.07923	1.24064	0.982432	0.933415	1.45431	1.0952	0.840694	1.06549	0.887039
5	19.5	1	1	0.842991	1.08497	1.08252	1.07615	1.26235	1.21743	0.829302	0.841108	0.868516	1.34781	0.302725	0.764618	0.567209	1.03355	0.960457	0.828741	1.20714	1.53836	1.26389	0.864707	1.2729	1.27944	0.847289	0.819315	NaN	1.46822	1.06024	1.57232	0.87294	1.30558	1.02265	0.354546	0.982132	0.893077	1.04205	0.796548	1.22431	1.23293	0.63699	1.05208	0.719179	0.953542	0.833013	0.677439	0.924152	0.88855
5	19.65	1.5	1	1.14609	0.988453	1.06676	0.749825	1.48424	1.4096	0.718641	1.02166	1.18137	1.59278	0.425609	0.756243	0.530475	1.2298	0.804623	1.0839	1.09032	1.26999	1.08824	1.36152	0.960614	1.20251	0.961168	0.879159	NaN	1.33131	0.948942	1.28402	0.737252	1.08335	1.49327	1.19681	0.890334	0.473676	0.741802	0.715248	1.02387	1.07474	0.67721	1.35393	1.25971	1.35502	0.466956	0.562534	0.486926	1.14726
5	20.2	1	1	0.681566	0.386638	0.490767	0.477898	0.819617	0.839423	1.15762	1.0386	0.626447	0.80722	0.678089	1.4968	1.13568	1.36379	0.748124	0.999949	0.670141	1.09745	1.32861	0.823941	0.797466	1.08132	0.928005	1.03346	NaN	1.73402	1.45564	1.33057	1.50406	1.7912	1.19194	0.69676	1.18527	0.944934	1.08033	1.09799	1.01799	0.654748	0.852655	1.18003	0.538441	0.798262	0.890943	1.05219	1.00497	1.30862
5	20.525	2	1	1.30479	1.31237	1.52479	1.4732	0.659486	1.28353	0.71828	1.42092	1.28899	1.52538	1.08353	1.12972	0.935385	1.20811	0.868393	0.67257	1.26867	1.04028	0.750832	1.04968	1.05188	1.15825	1.36417	1.65	NaN	0.861477	1.21381	1.63085	0.671125	1.42025	1.63729	1.54594	1.37866	1.32462	1.45983	1.68094	1.05978	1.43872	0.968387	1.52827	0.627527	1.11364	1.07994	1.44676	1.25905	1.26619
5	21.125	3	1	1.48157	1.35631	1.21136	1.15004	1.66511	1.58609	1.34904	1.15846	1.35168	1.0131	1.48686	1.10066	1.14726	1.32483	1.09053	0.927811	1.17983	1.46978	1.16058	1.07045	1.35347	1.1732	1.43918	1.29472	NaN	1.75261	1.43725	1.22032	1.21409	0.988773	1.72746	1.44362	0.865327	1.44409	1.18292	1.47918	1.47455	1.57965	1.43848	1.40609	1.26164	0.748757	1.19915	1.09545	1.64383	1.31082
5	23.25	1.5	1	1.12612	1.2271	0.87506	0.904357	1.16429	1.16117	0.92891	0.735332	1.30657	0.91141	0.271546	0.60053	1.26437	1.3573	1.09292	0.950159	0.860453	0.829581	1.13845	1.25149	1.17118	1.19918	0.928103	0.943083	NaN	1.38119	0.580998	1.03757	0.543152	1.03711	1.35086	1.10783	0.973803	0.87851	1.15205	1.02882	1.49785	1.32387	1.30836	1.55322	1.47457	1.4142	0.716068	0.878994	0.592149	0.956646
5	23.7	0.666667	1	0.297193	0.404124	1.25213	0.748433	0.621601	0.539579	0.640345	0.940577	0.477029	0.777324	0.331332	0.527164	0.643264	0.603384	0.840964	0.856189	0.650257	0.37123	0.880641	0.51143	0.647502	0.472255	0.640066	0.475222	NaN	0.570557	1.03495	0.697374	0.479615	0.551278	0.653775	0.640777	0.823749	0.841845	0.984927	1.05305	0.468399	0.421658	1.09982	0.865576	0.541205	0.672703	0.7803	0.718786	0.466525	0.641752
6	1.55	4	1	0.813725	0.770652	1.23535	0.913778	1.04723	0.816831	1.08712	1.16724	1.16129	0.981588	0.834642	0.567319	0.828704	1.17987	0.702148	1.0155	1.06734	1.46397	0.484611	0.812791	0.795506	0.817758	0.826717	0.848525	1.50606	0.818102	0.848759	1.25159	0.407736	0.386551	1.6689	1.32421	0.977119	1.29925	0.937774	1.30602	0.934694	1.22212	0.816505	0.992499	0.958916	1.13802	0.894123	0.932675	0.95046	1.17994
6	1.775	3.5	0	0.802698	0.774673	0.669737	0.851754	1.02016	0.578679	1.24583	1.64628	1.28537	1.8461	0.822896	0.537961	1.1196	1.23957	1.41055	1.15316	1.39974	1.5069	1.00318	1.20292	1.24865	1.34425	1.37057	1.14284	1.41529	0.954064	1.34199	1.48271	0.723199	0.765225	0.938214	1.32303	1.38875	1.5977	1.52779	1.57145	0.713642	0.812418	1.47199	1.51984	0.830121	0.989918	1.31488	1.30386	1.24341	1.52241
6	2.6	15	1	0.988583	0.751222	0.78581	0.435465	0.761119	1.08022	0.920503	0.932283	1.28351	1.10217	1.19825	1.05877	0.948027	1.0799	1.49406	1.29793	1.30899	1.2741	1.37503	1.40952	1.41032	1.40177	1.25507	1.2062	0.568949	0.818692	1.26383	1.66192	1.06138	1.10741	0.891034	1.07316	0.889838	0.963051	0.651234	1.28613	0.769661	0.852518	0.877381	1.00209	1.1575	1.24264	0.973054	1.17173	1.09941	0.889264
6	3.2	8	0	1.01466	0.826686	0.805739	0.47291	1.30593	1.25396	0.95776	0.929142	0.408284	1.16759	0.802566	0.993226	0.730539	0.411371	0.462231	0.376959	0.652884	0.323719	0.742509	0.474942	0.711228	0.734091	0.933386	0.785237	0.130711	0.81082	0.593011	0.817057	0.602647	0.345076	1.00036	1.19592	0.748876	0.441432	0.551667	0.639253	0.841909	0.604474	0.643981	0.73471	0.836917	0.663855	0.756859	0.44898	0.741313	0.977635
6	4.875	4	0	1.03059	0.894754	0.753949	1.25559	1.53803	1.51891	0.999952	1.43802	0.915556	0.926946	0.867262	0.480913	1.1241	0.901892	0.69672	0.7466	0.764501	0.562892	1.2171	0.620397	0.907207	1.09534	0.93728	1.0241	0.95807	0.929416	0.704895	1.0274	0.891008	0.890727	1.24477	1.48095	0.979468	1.04755	1.14425	1.27992	1.26381	1.29429	1.10146	1.17285	1.33047	1.09419	0.764146	0.373512	0.903765	1.12563
6	5.6	4	0	1.04066	0.782997	1.33249	1.07829	1.16235	1.15451	1.47872	1.10481	1.34703	1.50499	1.40641	0.788422	1.36069	1.23908	1.09605	1.32246	1.44646	1.79631	0.843486	1.32827	1.12926	1.68004	1.26341	1.25763	1.50488	1.54927	0.756129	1.13987	0.709765	0.601495	1.06163	1.34915	1.53096	1.55086	1.39147	1.79143	1.34093	1.23019	1.15016	1.56351	1.18686	1.1985	1.54853	1.65638	1.51795	1.64287
6	6.45	5	0	1.0827	0.946455	0.965568	0.895847	0.872541	0.581294	0.6301	0.773722	0.460679	0.351716	1.39391	1.29497	0.88213	1.1442	0.831213	1.39273	1.21318	1.28977	0.663997	1.05174	0.882862	1.16446	0.850716	0.933434	1.35694	0.958096	0.859427	1.03003	0.807759	1.09659	1.0646	0.992781	0.831495	0.860824	0.621916	0.507877	0.53188	0.730988	0.873326	0.902094	0.704493	1.09499	1.21882	1.33335	1.52457	1.23643
6	10	1	0	1.15267	1.07746	1.61032	0.902496	1.30229	1.28521	0.927799	0.634928	1.33655	0.874496	1.36349	1.06447	1.24858	0.772989	0.715218	0.521896	0.772491	0.746764	0.980136	0.674958	1.23789	0.819908	1.0586	0.934093	1.29736	0.758701	0.973744	0.982009	0.819777	0.956243	1.28729	0.85379	0.922443	0.865271	1.15031	0.782693	1.17052	1.01956	1.36053	1.11132	1.4146	1.1406	1.40451	1.01501	1.68501	1.40793
6	10.2	3	1	1.05034	1.20367	1.56917	1.13667	1.62917	1.55717	1.53903	1.1064	1.34852	1.25954	1.04394	0.772823	1.10356	0.6453	1.08282	0.36392	0.922879	0.330884	1.1619	0.880452	1.04406	0.608875	0.904571	0.822165	1.07764	0.283183	0.919596	0.809884	1.16081	0.646765	1.23692	0.910952	1.17093	0.906491	1.21887	0.811776	1.47725	1.32264	1.34113	0.948099	1.21395	1.00665	1.03402	0.713552	1.22771	1.4428
6	10.75	4	1	1.13468	0.947639	1.62187	1.31031	0.752656	0.662636	1.11197	1.20449	1.46776	1.49649	1.48126	1.06286	1.14405	0.942399	0.795048	0.533985	0.565965	1.31545	0.923994	1.04317	0.822852	0.816061	1.14504	1.04478	1.09614	1.13504	0.687175	0.795643	1.66303	1.43808	1.28365	1.46615	0.929706	0.728131	1.16875	0.932312	1.08704	0.793546	1.26902	0.665373	0.969037	0.783855	1.25258	0.750017	0.97198	0.841016
6	11.425	4	1	1.06539	1.27047	1.16579	1.30371	0.590107	0.55132	1.4177	0.554792	0.631983	0.949012	1.4256	0.583795	0.728888	0.565988	0.76705	0.52232	0.695733	0.893245	0.625784	0.446293	0.965684	0.821765	0.719132	0.512693	0.806469	0.655276	0.517734	0.357877	1.29431	0.866492	0.976576	0.964798	0.636969	0.582276	0.740909	0.840722	0.904534	0.818526	0.926396	0.657889	1.14892	0.709225	0.901725	0.767893	0.70366	0.973766
6	12.825	3	1	0.679552	1.08018	0.825344	0.952234	1.08656	1.15313	0.557182	0.863525	0.389636	0.467538	1.16395	0.996816	1.19056	0.953739	1.27832	1.12908	1.39556	0.914853	1.26149	0.779562	1.12913	1.14967	0.792806	1.13533	0.465536	1.11439	0.878428	0.756665	1.42805	1.12927	0.656272	0.238435	0.800641	1.06622	0.667648	0.487482	0.466839	0.515268	0.725542	0.985344	0.72046	0.596014	1.02043	0.845894	1.29317	0.844075
6	14.15	6	1	0.668231	0.653226	1.05421	0.832954	0.851995	0.56057	0.621023	0.53176	0.588411	0.872214	0.620578	0.923648	0.854223	0.748339	0.409226	0.681832	0.440768	1.06101	0.377168	1.16453	0.365015	1.20033	0.513394	0.742329	0.714486	0.436421	0.520067	0.532082	0.427507	0.865132	1.17408	0.686079	0.604053	1.07908	0.532505	1.13106	0.455134	0.555624	0.518323	1.07242	0.246616	0.598152	0.555329	0.861978	0.871885	0.932348
6	15.025	2	0	0.595898	0.727408	0.433519	0.60271	0.631532	0.737071	0.306329	0.296448	0.542425	0.299991	0.273984	0.581447	0.447738	0.49717	0.620734	0.280377	0.22261	0.545937	0.410554	0.605113	0.570193	0.458205	0.349318	0.388407	0.309634	0.455763	0.796565	0.953714	0.6911	0.423747	0.685472	0.410137	0.41017	0.332126	0.489071	0.526189	0.496605	0.551636	0.680502	0.534401	0.523834	0.714068	0.495584	0.547709	0.785017	0.551356
6	15.75	3	1	1.38507	1.58732	1.14581	1.06426	1.47289	1.29967	0.412426	1.2615	0.959033	1.01399	0.807059	0.796412	0.965537	0.912329	0.887363	0.989122	1.01343	1.50512	1.11716	1.46486	0.886748	1.11832	0.681818	0.961435	1.57691	1.25021	0.276779	1.43013	0.658865	1.05055	0.937718	0.803469	0.744007	0.831634	1.24401	0.741924	1.06319	1.33347	1.0289	1.09682	0.944577	1.16177	0.947971	0.507314	0.849227	0.946452
6	16.55	2	0	0.942304	0.95586	0.841285	1.05138	0.536001	0.801168	1.3099	1.55229	1.41623	1.4064	1.35815	0.968927	1.10366	1.45527	1.33705	1.15447	1.1751	0.946586	1.01925	1.06772	0.965878	0.988229	1.207	1.24982	1.62398	1.49528	1.13697	1.06022	1.07079	1.15866	0.967111	0.956168	1.21897	1.12759	1.07172	1.26251	1.09473	1.07861	1.00573	1.02255	1.12095	1.20028	0.918345	1.15447	0.44382	0.842164
6	17.175	1.5	0	0.922481	1.29228	0.755533	1.30155	0.861451	0.918869	0.718172	0.509955	1.40906	0.58142	0.564307	0.548514	0.557053	0.343057	0.410739	0.0945095	0.444162	0.119456	1.0417	1.05068	0.502999	0.555124	0.66996	0.70224	0.139583	0.340598	0.515648	0.589463	0.703376	0.322178	0.9811	0.858745	0.605826	0.849287	0.431246	0.698749	1.01739	1.12294	0.656705	0.909897	1.39815	1.00821	0.576996	0.613425	0.898605	1.19
6	19.5	3	1	1.2285	1.42586	1.39337	1.23469	1.50015	1.3699	1.16108	0.558977	0.939346	0.838873	0.715886	1.13154	1.38576	1.19612	0.879055	0.758062	0.728044	0.798795	1.31113	1.30901	1.147	1.38043	1.26745	1.1643	1.04165	1.21667	1.12453	1.02135	1.1351	0.883289	1.22774	1.12572	1.18091	0.848966	0.865383	0.487999	0.80329	1.19299	1.18852	0.798216	1.30067	1.28043	0.727885	0.483742	0.533337	0.762075
6	19.65	1	1	0.906475	1.1702	1.2433	1.12152	1.19671	1.26667	1.23516	0.613325	1.60958	0.648077	0.680963	0.979053	1.14936	1.07079	0.995032	0.572671	1.04798	0.6056	1.54891	1.30196	1.01332	1.31996	1.11168	1.12075	1.01556	0.354348	1.09203	1.01238	1.14614	0.780442	1.27361	1.2844	1.10857	0.986942	1.1205	0.709488	0.957737	0.883517	1.0796	1.39164	1.17212	1.27247	1.09464	0.806042	1.05084	0.989978
6	20.2	1	0	0.632347	0.887198	0.671016	1.58301	0.585716	0.705457	0.900647	1.08778	0.947614	1.15205	1.15988	0.524755	0.954945	0.754053	0.946535	1.24303	0.304995	1.34415	0.74932	0.918373	0.947472	0.78334	0.890392	1.11056	0.642946	1.01133	1.1885	1.03692	1.41945	1.04225	0.523489	0.985507	1.04797	0.893381	0.751014	0.670114	0.731863	0.728931	0.680173	1.17015	0.903011	1.27094	0.980679	0.909618	0.717075	0.705788
6	20.525	1.5	1	0.899215	0.826885	1.16496	1.1933	1.11824	1.51113	0.991055	0.895005	0.901935	1.01576	0.556592	0.730776	0.613141	1.02426	0.740068	1.25717	0.758779	0.671245	1.13772	0.741569	1.33098	0.968203	1.13612	0.9567	0.890768	0.777748	1.57627	1.42592	0.843036	0.965431	0.506056	1.20082	0.977931	1.07812	0.611751	0.886649	1.23354	0.795839	0.862057	0.503596	0.977121	0.74543	0.931421	1.0832	1.10597	0.686152
6	21.125	5	1	1.21033	1.16531	1.11611	1.33536	1.14785	1.40045	1.22054	1.18419	0.812717	1.29645	0.730116	1.22612	1.1725	1.31052	1.19144	1.23419	0.426664	1.38793	1.13219	0.816767	0.766603	0.726411	1.00229	1.09208	0.515961	0.568858	1.4481	0.937397	1.26944	1.17487	1.06087	1.33715	1.18564	1.16578	1.23173	1.4309	1.36514	1.43813	1.28092	1.49468	1.28277	1.40822	1.03306	1.02791	1.50461	0.970384
6	23.25	1.5	1	0.441666	0.596986	0.224076	0.648816	0.732671	0.774592	0.586009	0.737177	0.929805	0.990715	1.10294	0.898464	0.899501	1.02847	0.57609	0.853669	0.509234	0.488742	0.914844	0.844923	0.70634	0.705279	0.467477	0.617998	1.16536	0.487527	0.885785	0.406384	0.830493	1.19979	1.2557	1.14128	0.725767	0.782052	0.944009	0.763063	0.689188	0.660074	0.970773	1.0567	0.934755	0.993681	0.730846	0.731606	0.678512	1.48468
6	23.7	2	1	0.908288	1.25702	0.866346	1.10161	0.490461	0.621896	0.778651	1.04433	0.594009	0.967694	1.04477	0.599008	1.38847	1.26418	1.20034	1.37264	0.994766	1.45624	0.591588	0.813841	1.20698	1.31973	0.879973	1.23433	0.739168	0.401159	0.713563	0.975372	0.694503	1.36427	0.521331	1.01109	0.752147	1.11513	0.517174	1.23875	0.713461	0.941461	0.908788	0.825408	0.79684	0.835387	0.871754	0.742944	0.587786	1.00834
7	1.55	1	1	0.882927	0.795546	0.826537	1.11449	0.949478	0.772662	0.946161	1.21623	1.17785	1.25658	0.387787	0.704739	1.03288	1.11846	0.947678	1.2728	0.735653	1.22918	0.880102	1.09549	0.916626	1.13102	0.711426	0.88742	NaN	NaN	0.565373	0.915787	0.601094	0.85767	0.377699	0.642302	0.583187	0.972664	0.744207	0.924305	0.372332	0.389577	0.868156	0.898974	0.847145	0.867702	0.696574	0.751953	0.401395	0.240975
7	1.775	3	0	1.61868	1.52318	1.20485	0.90443	1.38373	1.31936	0.807687	1.29501	0.741455	0.612791	1.08676	1.10816	0.666434	0.81063	1.28803	0.757838	0.832213	1.0023	1.70796	1.67114	1.467	1.40107	1.56105	1.54759	NaN	NaN	1.23792	1.42749	1.06232	0.988162	0.865644	1.23744	1.09963	1.27895	0.75491	0.921885	1.43418	1.32128	1.04038	0.956344	1.5015	1.29252	0.599218	0.820915	0.551751	0.573873
7	2.6	3	0	1.50568	1.30261	1.69684	1.56915	1.51801	1.63157	1.14977	1.33564	1.0422	1.43962	1.4499	1.66698	1.06914	1.3956	0.753362	1.06152	1.7016	1.35661	1.50761	1.41752	1.30669	1.24403	1.37303	1.3324	NaN	NaN	0.979988	1.52554	1.11905	1.58379	1.52797	1.2143	1.40626	1.26768	1.09879	1.00923	1.36136	1.5604	1.52184	1.61314	1.54539	1.44097	1.26069	1.11937	1.56601	0.998923
7	3.2	4	1	0.70001	0.792702	0.559744	0.563367	1.07977	0.908975	0.830476	1.20564	1.37719	0.844264	0.880485	0.723609	1.01111	0.911132	1.54557	1.34154	1.35038	0.840735	1.03928	0.795589	1.44018	1.08684	1.4089	1.08689	NaN	NaN	1.45327	1.1049	0.974827	0.306504	1.09138	1.11209	1.03647	0.937118	0.519886	1.00276	1.20337	1.4276	1.06076	1.04439	0.775853	0.976792	0.766223	0.640635	1.2933	0.727673
7	4.875	4	0	1.2017	1.14812	0.839866	1.12441	1.30873	1.13707	0.415008	0.72406	0.871112	0.6447	0.710296	1.18547	1.03897	1.16702	1.37911	1.63267	1.23339	1.69477	1.30665	1.45343	1.00225	1.42953	1.30272	1.35667	NaN	NaN	1.27061	0.59712	1.06425	1.36801	1.18705	1.01779	1.17288	1.15865	1.30825	1.08915	1.49116	1.32564	1.17872	0.971133	1.131	1.51861	0.911464	0.722924	0.754752	0.540963
7	5.6	6	0	1.40514	1.24408	0.985481	0.96389	0.963037	0.916436	0.889498	1.03617	0.906459	1.00042	0.541885	0.430963	1.21847	1.10469	0.907975	0.691705	0.68063	0.833467	1.21396	1.00864	1.08397	0.817478	1.132	0.970472	NaN	NaN	0.791485	1.04729	1.05494	0.965408	0.763219	0.848635	0.964753	1.01407	0.883943	1.30004	1.20537	1.31518	0.977618	0.841012	1.25833	0.840935	1.1346	1.0468	0.657793	1.12811
7	6.45	2	0	0.49797	0.491388	0.888462	0.455545	1.15026	0.8986	1.33274	1.12228	1.2142	0.98351	1.2509	1.47407	1.07689	0.809505	1.49264	1.03492	1.33538	1.3522	1.25674	0.761539	1.09766	0.987969	1.26251	1.29293	NaN	NaN	0.645383	0.759949	1.40881	0.908513	0.707734	0.940019	0.726329	0.780372	0.776056	0.70783	0.776263	0.682513	0.782119	0.780465	0.675556	0.522288	1.06606	1.22482	1.25558	1.07617
7	10	1	0	0.726365	0.703516	1.01468	1.11788	0.828997	0.671049	1.34096	1.00771	1.24123	1.03078	1.55799	1.10806	0.984775	0.885436	1.22423	1.18324	0.890514	0.827355	0.781721	0.724909	0.577538	0.678107	0.791048	0.982387	NaN	NaN	0.847993	0.843592	1.00931	1.15802	1.11021	0.886837	0.793369	0.936471	0.648046	0.907829	0.710236	0.687156	0.461442	0.747726	0.716393	0.762031	0.88352	0.896447	0.77498	0.843609
7	10.2	3	1	1.28037	1.06641	1.11712	1.23732	1.39515	1.37358	0.58414	1.19482	0.858665	1.17218	0.582557	0.895427	0.693658	1.18257	0.698012	1.3938	1.51079	1.14367	0.783275	1.16726	0.882265	0.968506	1.08952	1.03826	NaN	NaN	1.48364	1.44692	1.09848	0.802375	0.871646	0.944669	1.23806	0.943999	0.841946	1.35545	0.681095	1.05066	1.24966	1.05122	0.989526	0.879171	1.14106	1.12999	1.14848	0.667578
7	10.75	3	1	0.942295	1.12879	0.818868	1.16557	1.18951	0.818847	0.615477	0.991583	0.541084	1.21481	1.01754	0.862222	1.09836	0.536405	0.153136	0.358366	0.398151	0.283932	0.518194	0.902766	0.548185	0.577094	0.626261	0.546456	NaN	NaN	0.75034	0.643866	1.21093	1.44386	0.964908	0.880518	0.624477	0.771151	0.988481	0.992087	0.870286	0.919185	0.864559	0.804154	0.730304	0.821204	0.66669	0.500313	0.47237	0.87408
7	11.425	2	0	1.12326	0.748775	1.21401	1.35894	1.10276	0.789541	0.756535	0.547822	0.961509	1.03196	0.978564	0.659213	1.09563	0.841255	0.509554	0.560172	1.04936	0.75568	1.29024	1.19522	1.17599	0.997745	0.984545	0.750246	NaN	NaN	1.21128	1.01568	0.887366	1.40239	0.84808	0.654056	1.22237	1.36309	1.55762	1.56108	0.63193	0.651611	1.0654	1.15437	1.40088	1.21903	0.822162	0.57178	1.12674	1.02335
7	12.825	3	0	0.973794	1.00183	1.35289	1.21458	0.745334	0.699346	0.706467	0.979108	0.974997	0.772534	0.930165	1.32577	1.15845	1.34046	0.454156	1.59271	1.20113	1.35595	0.722324	0.867789	0.987134	1.32765	0.825345	1.02638	NaN	NaN	0.98972	0.733932	1.18189	0.971009	0.926707	0.969809	0.872336	0.92012	0.850458	0.807455	0.832694	0.650966	0.769949	0.654642	0.686222	0.64465	1.22377	1.50934	1.17317	1.295
7	14.15	4	0	0.657057	0.902577	0.914411	0.68401	1.12311	0.543337	0.553956	1.18848	1.08544	0.707667	1.09232	0.809183	1.22461	1.12779	1.16204	0.65918	1.23861	1.35232	0.7915	0.562137	0.910244	0.793599	0.926067	1.14312	NaN	NaN	0.631631	0.78828	1.19197	1.30613	0.865716	0.768289	1.26362	1.09177	1.10231	1.1514	0.978246	0.908917	1.0354	1.00661	0.727444	0.828205	1.01413	0.969561	0.56654	0.521852
7	15.025	5	1	1.33493	1.2989	1.25482	1.22971	1.09995	1.25619	1.37093	1.10656	0.833284	1.35289	1.39826	1.0608	1.1378	1.3031	0.722523	0.888123	1.13046	1.29222	1.14901	1.39118	1.18303	1.16434	1.24408	1.08636	NaN	NaN	1.23708	1.55215	1.54867	1.31622	1.16787	1.16026	1.37136	1.42194	1.0822	1.1086	1.2258	1.3097	0.848717	0.970983	1.28784	1.32469	1.20897	1.37965	0.82827	1.06127
7	15.75	4	0	1.04239	1.20628	1.15675	1.3379	1.4042	1.62493	0.657036	0.75897	0.99301	1.57046	1.58687	0.985245	1.21385	1.19043	0.900978	0.675179	0.724212	0.833129	0.933311	0.465277	0.8734	0.64746	1.03732	1.16181	NaN	NaN	1.248	1.22502	1.01736	1.37945	1.15636	1.4727	1.2746	0.837368	0.845254	0.73422	1.5703	1.42172	1.17757	0.975827	0.839578	0.783751	0.84644	1.15824	0.684254	1.17671
7	16.55	5	1	0.882288	1.26262	1.10858	0.9703	0.68516	0.95342	0.883	0.806311	1.02291	0.862424	0.826811	0.662668	1.19185	1.29766	1.08285	1.51735	1.25536	1.11731	0.986787	0.77532	0.763567	1.37686	0.801563	1.27072	NaN	NaN	0.943564	1.15374	0.496188	0.674115	1.05111	1.37062	1.2811	1.32471	1.19495	1.34316	0.734751	1.15061	1.02237	1.39022	0.774941	1.56494	0.701768	1.00705	0.481438	0.576482
7	17.175	4	1	1.02676	1.01554	0.940093	1.30568	1.4706	1.3088	1.18826	1.3578	1.19644	0.873689	0.833693	1.20015	0.790171	1.00163	1.54744	1.48811	1.1413	1.01773	1.37277	1.35662	1.14792	1.35671	0.972511	1.24909	NaN	NaN	0.548257	0.564697	1.24981	0.939979	1.01988	0.872894	0.79641	0.810702	0.726662	0.575306	1.21369	1.13469	1.12573	1.08245	1.05216	1.29978	1.16721	1.44031	1.7248	1.55467
7	19.5	2	1	1.35479	1.46766	0.735231	0.719063	0.95248	1.10909	0.785152	0.932603	1.16627	1.10078	1.04535	1.13735	1.04794	1.16191	0.815395	1.18823	0.886832	0.935932	1.2168	1.10548	1.35177	1.38779	1.00236	1.00905	NaN	NaN	0.890058	0.995894	0.843838	0.383936	0.420954	0.8878	0.613837	0.63209	0.641462	0.29899	1.1483	0.908116	0.974681	1.00018	1.21984	1.28346	0.747163	1.22376	0.439123	0.762872
7	19.65	2	1	0.88547	1.07004	0.429039	0.750305	1.18985	0.927906	0.654326	0.518909	1.25331	1.29853	0.458138	0.76001	0.851343	0.900743	1.19663	0.579588	1.02941	0.946933	1.07864	0.991683	1.28773	0.968232	1.0738	0.987144	NaN	NaN	1.11741	0.78532	0.745652	0.648573	0.670776	0.59181	1.19353	0.994752	0.857555	1.11229	1.20251	1.07602	1.34939	1.26677	0.766736	1.21598	0.614534	0.814844	1.345	0.864786
7	20.2	2	1	0.669179	0.403342	0.859644	0.671194	0.898931	0.813342	1.05225	0.644491	0.905214	0.871448	0.736614	0.669372	0.664803	0.522573	0.328242	0.461009	0.534025	0.742984	0.571895	0.473606	0.639015	0.57623	0.886609	0.691494	NaN	NaN	0.836448	1.0806	1.1795	1.22713	1.16389	0.909374	1.06605	0.984066	1.43389	1.05614	1.01505	0.958965	0.67382	0.696496	0.597397	0.470155	1.06515	0.821163	0.995367	0.896251
7	20.525	2	1	1.24352	1.48097	1.35338	1.50045	1.24626	1.41574	1.00594	0.590431	1.41206	0.941146	1.59533	1.60005	1.35119	1.15606	1.08092	0.748814	1.57036	1.4969	1.37799	0.676495	1.49351	1.21543	1.56949	1.44344	NaN	NaN	0.953663	1.39548	1.60564	1.51112	0.893879	1.07309	1.52904	1.37737	0.834135	0.899945	1.66088	1.75956	1.63061	1.52796	1.32791	1.10532	1.06968	0.916803	1.08281	0.7038
7	21.125	3	1	1.58128	1.47096	1.3677	1.67217	1.13689	1.32317	0.918391	1.05569	1.30656	1.60204	1.54925	1.41902	1.14905	0.871062	0.650255	1.1067	0.559877	0.833901	0.818421	1.2428	1.07714	0.905643	0.709632	0.807271	NaN	NaN	1.08213	0.913065	1.42678	0.90416	1.30996	1.48615	0.539912	0.660476	0.763903	0.916369	0.861437	1.07378	1.12786	1.35428	1.33171	1.44132	1.39535	1.13446	1.71073	1.69673
7	23.25	3	1	0.632312	1.01204	0.530133	0.677198	0.683193	0.965095	0.850453	1.19092	0.963306	1.02394	1.49613	1.31824	1.3552	1.49006	1.1467	1.5841	1.34151	0.77817	1.22814	1.46628	1.20601	1.30401	1.12845	1.03456	NaN	NaN	1.34727	1.2324	1.51564	1.2806	1.0623	1.02087	0.739824	0.706331	1.07849	0.936364	0.625982	1.08068	0.713391	1.01863	0.98253	1.36293	0.673736	0.865998	0.348659	1.10725
7	23.7	2	1	0.723681	0.50677	1.01362	0.663935	0.925163	0.718561	1.01475	0.820119	1.13146	0.869572	1.18925	1.49984	1.51039	1.15411	1.51241	1.39541	1.12115	0.473724	0.906087	0.780792	0.800014	0.635871	0.905593	0.840182	NaN	NaN	1.14215	0.767708	0.798368	0.881684	0.799286	0.657526	1.19698	0.708296	0.791927	0.619046	1.07217	0.753382	1.2617	0.948547	0.499561	0.614263	0.831865	0.682228	0.621181	0.659837
8	1.55	3	0	1.22106	1.24881	1.36898	0.976844	0.666528	0.813232	1.18527	0.982256	1.16031	0.679826	1.28929	1.1459	1.56076	1.5736	1.74153	1.29603	1.55228	0.922266	1.25182	0.787835	1.12135	1.36936	1.4378	1.30495	NaN	1.25104	0.469132	1.08051	1.08484	1.12699	1.46402	1.10961	1.18619	0.975825	0.980599	1.05206	1.25947	1.23775	0.880231	1.11916	1.19447	1.1295	1.13422	1.09506	1.46116	0.291742
8	1.775	3	0	0.468426	0.787379	1.3082	1.43679	0.941795	0.985279	0.750658	1.45963	0.816228	0.575714	1.03411	1.2795	1.46673	1.13792	1.21749	0.828898	0.765652	1.00254	0.594884	0.933612	0.941298	0.877439	0.956592	0.965377	NaN	1.12897	1.27146	0.747473	0.913351	1.26204	0.917814	0.64535	1.29925	0.797199	0.959868	0.927429	0.952863	1.37085	0.793204	0.868409	1.00813	1.11979	0.843571	0.868824	0.797328	0.606054
8	2.6	2	0	0.630514	0.493656	0.896299	0.646009	0.630191	0.379115	1.01321	1.54602	0.468042	0.684933	0.697203	0.705723	0.7157	0.738624	1.03945	0.574628	0.56855	0.329506	0.761925	0.328313	0.844444	0.375175	0.567639	0.506231	NaN	0.275705	0.888703	0.658327	1.38049	1.09988	0.408345	0.354857	0.5483	0.261348	0.556547	0.495946	0.727045	0.65259	0.677696	0.325312	0.62036	0.567392	0.484088	0.264407	0.790838	0.686505
8	3.2	8	1	0.571531	0.774381	0.890436	0.836043	0.851168	0.898486	0.676201	0.560878	0.6477	0.673915	0.405012	0.590663	0.650308	0.613977	0.667084	1.31737	0.478528	0.523655	0.703581	1.23763	0.758663	0.746659	0.617295	0.961249	NaN	0.452889	1.36369	1.04971	0.629084	0.671879	0.640645	0.641821	0.824349	1.06776	1.00978	0.827559	0.532665	1.08165	0.914126	1.35734	0.693573	1.15225	0.470212	0.844708	0.520522	0.322251
8	4.875	2	0	1.05773	0.946966	1.26983	1.18149	1.49108	1.05831	1.30976	1.38944	0.969059	1.45834	1.00621	0.83965	1.09615	0.85663	0.375528	1.38862	1.02851	0.813293	1.16035	0.910835	1.01489	0.932364	0.856147	1.03193	NaN	1.33207	1.27551	0.950379	1.105	0.873279	0.670777	0.666631	0.868881	0.649267	1.13118	0.593588	0.932389	0.719699	0.933418	0.86662	0.737494	0.567864	0.89953	0.629515	0.655721	1.04506
8	5.6	9	0	1.01762	1.34704	0.633879	0.96941	0.873463	0.617445	1.22666	1.12377	1.12006	0.462641	0.740759	1.00906	0.441591	0.785272	0.349268	0.427342	0.509502	0.988434	1.04888	1.02022	0.936489	0.884875	0.877255	0.9241	NaN	0.454486	1.32163	1.10077	0.69413	0.785914	0.538509	0.510494	0.781209	0.881677	0.862012	0.97399	0.707211	0.497084	1.26649	1.03377	0.883909	0.935238	1.06741	0.754218	0.794833	0.684262
8	6.45	2	0	1.11983	1.19278	1.1116	1.14207	1.47631	0.954379	0.98265	1.16067	0.41448	0.954395	1.31136	0.953846	0.914846	0.801293	0.279134	0.661785	1.01756	1.46151	1.41873	1.23101	1.27967	1.02928	1.1911	1.27975	NaN	0.459521	0.679841	1.04215	1.12796	1.29585	0.597309	1.0218	0.82515	1.05296	0.797364	1.11448	0.830096	0.796937	0.771821	1.34648	0.892839	0.914578	1.136	1.25545	1.3383	1.41867
8	10	2	0	0.264887	0.363433	0.450334	0.608661	0.441535	0.241902	0.691319	0.881406	0.897814	1.00636	0.307071	0.580214	0.379204	0.894227	0.469259	0.813285	0.379612	0.634137	0.51698	0.683869	0.397285	0.559368	0.233188	0.370539	NaN	0.315584	0.370174	0.37716	0.304718	0.404412	0.445149	0.354668	0.49406	0.380729	0.810471	0.484773	0.932524	0.737919	0.335195	0.628848	0.444504	0.54815	0.507238	0.619063	0.586239	0.492347
8	10.2	4	1	1.45674	1.0991	1.23164	1.30552	1.71666	1.39456	0.916708	0.804426	1.17798	1.17717	0.935861	0.990871	0.503915	0.69479	0.432765	0.9655	0.865361	1.14731	1.29099	1.15801	0.936816	0.839699	1.19396	1.05589	NaN	0.974341	1.17368	0.859336	0.798029	1.09353	0.963767	1.21811	0.904592	1.03924	0.894323	1.07055	1.20518	1.03397	1.5526	1.10964	1.48973	1.19761	1.13542	1.29309	1.38804	0.662042
8	10.75	4	0	0.451491	0.415005	0.298314	0.264645	0.49378	0.524099	0.283269	0.643685	0.493508	0.463133	0.191399	0.318838	0.250002	0.307496	0.17583	0.2484	0.299675	0.429191	0.36967	0.421982	0.199342	0.290302	0.32427	0.268278	NaN	0.160751	0.710951	0.602593	0.242256	0.293276	0.359283	0.369273	0.308818	0.228982	0.386183	0.25411	0.497747	0.442091	0.371073	0.362075	0.21984	0.415415	0.388415	0.423707	0.114474	0.242827
8	11.425	2	1	1.17266	1.00174	0.830966	0.934299	0.963872	0.748581	0.909078	0.698871	0.719723	0.743996	0.790077	0.785495	0.588959	1.19011	0.341894	0.916303	0.751538	0.794135	1.16882	1.01228	0.65703	0.826171	0.806152	0.896171	NaN	0.497009	0.786432	0.943313	0.753985	1.25123	0.832647	0.831227	0.778604	0.728716	0.793582	0.541618	0.584148	0.698397	1.04588	1.00487	0.951668	0.922316	0.734612	1.04731	0.662923	0.688001
8	12.825	3	1	1.10162	1.09365	1.35155	1.21001	0.718843	0.597758	1.20881	1.04275	1.25306	0.601309	1.07713	0.794268	0.531079	0.439777	0.355058	0.791511	0.517224	0.893355	0.645654	0.63233	0.585153	0.710989	0.532049	0.759993	NaN	0.532582	0.266101	0.43501	1.05002	1.52692	0.502605	0.574948	0.545418	0.679668	0.870145	0.552233	0.751305	0.713427	0.972328	0.659922	0.8792	0.713698	0.580947	0.716931	1.44174	0.989285
8	14.15	6	0	0.744688	1.04134	0.965523	0.892177	0.678843	1.37267	1.0719	0.942368	1.24063	0.831572	0.757234	1.05331	0.993654	0.887641	1.09006	1.5403	1.11858	1.00221	0.929385	0.842974	0.967824	1.27258	0.936922	1.22092	NaN	0.853429	1.41063	1.0245	0.849715	1.13926	0.43845	0.736394	1.06458	1.01899	0.655827	0.721326	0.618219	1.08442	1.06829	1.18752	0.80357	0.843251	0.784777	0.814855	0.952625	0.677942
8	15.025	5	0	0.427568	0.474767	0.893441	0.661845	0.48408	0.662216	0.939955	1.24108	1.05226	1.1265	1.01841	0.904849	0.91135	0.908258	0.501201	0.354979	0.986287	0.717036	0.934959	0.619008	0.768934	0.56473	0.795756	0.711864	NaN	0.383668	1.26463	0.784086	0.890693	1.09073	0.392259	0.667579	1.1202	0.403752	1.10451	0.394874	0.665075	0.371181	1.44309	0.472892	1.07442	0.6776	1.01124	0.694656	1.61903	0.470618
8	15.75	2	1	1.39317	1.34758	1.3132	1.52134	1.25261	0.573284	1.28055	1.42272	1.48093	1.70487	1.30427	0.893174	1.0577	1.50551	0.384962	0.935916	0.665606	0.850777	1.49111	1.14864	0.914243	0.796709	1.10271	0.853416	NaN	0.950587	0.938282	0.758058	0.453839	0.817219	1.67714	1.40365	1.51302	1.32018	1.55208	1.07536	1.45458	1.30836	1.30498	1.0067	1.31351	1.50868	1.16874	1.12583	1.41092	1.46736
8	16.55	3	0	1.58021	1.53783	1.46448	1.59937	1.29553	1.1537	0.836641	1.4074	0.909978	1.36872	1.42774	0.827143	1.29925	1.32429	1.26891	0.925749	1.08227	1.17537	1.05572	1.63904	1.09404	1.35789	1.34545	1.22669	NaN	1.27611	1.41491	1.2632	1.1063	0.845283	1.78382	1.66441	1.45564	1.69013	1.60407	1.71661	1.67544	1.72761	1.4178	1.61157	1.68064	1.71718	1.16231	1.23818	1.40581	1.82622
8	17.175	0.5	0	1.42617	1.54468	1.35195	1.41045	1.40182	1.2446	1.51966	1.28759	1.60653	1.20539	1.56892	1.09221	1.18169	1.18778	1.31008	1.04213	1.26777	0.956541	1.50742	1.47965	1.45785	1.34908	1.31209	1.40108	NaN	1.34856	1.19409	0.937418	1.21111	1.29652	1.73105	1.57738	1.49415	1.62802	1.62747	1.67053	1.5914	1.66026	1.38135	1.40116	1.52172	1.4795	1.39061	1.39715	1.73025	1.6144
8	19.5	1	1	1.16507	1.10936	1.15405	0.992735	0.787068	0.917683	1.08975	1.00817	0.626222	0.77175	0.97818	0.691466	0.916043	0.869953	0.784836	0.708676	0.547186	0.843608	0.650897	0.934798	1.20568	1.08086	0.503792	0.63109	NaN	0.746519	0.787987	0.490112	0.990027	0.65375	1.05387	0.624894	0.896095	0.722833	0.872179	0.790715	0.706417	0.809956	0.448212	0.651371	1.1606	1.05179	0.626183	0.712297	0.730927	0.988035
8	19.65	0.75	1	1.48361	1.51255	1.27907	1.28339	1.43525	1.43894	0.757178	0.684282	0.768283	0.218748	0.968891	0.636477	0.907983	1.0134	1.29749	0.820931	0.90019	1.17662	0.812168	0.882983	1.35596	1.2098	1.0258	1.07091	NaN	0.931761	1.03739	0.77843	0.993964	0.880503	1.16266	1.23065	0.972018	0.720301	1.01683	1.00456	1.06864	1.17035	1.08133	0.894244	1.50656	1.11543	0.999182	0.603139	1.54231	0.84978
8	20.2	3	1	1.34056	1.09947	1.03248	0.857968	0.92633	1.26221	1.04463	0.758146	0.674967	0.646282	1.31846	0.812126	0.659117	0.535778	0.916399	0.404682	0.84686	0.925237	1.25912	1.33361	0.855053	1.24943	0.994888	0.995419	NaN	0.350624	0.298447	0.769275	1.42678	1.00314	0.76016	0.927824	0.608887	0.843421	0.804032	0.519512	0.492471	0.693558	0.916983	0.645362	0.573377	0.838033	1.01019	1.08994	0.890737	1.49412
8	20.525	5	0	1.27449	1.0229	0.790597	0.744574	1.13871	1.27958	1.44716	0.960627	0.923735	0.724956	1.12728	0.941555	1.31248	0.803733	0.818329	1.15054	1.34186	1.2065	0.990548	1.01185	1.17073	0.905656	1.11065	1.09747	NaN	0.657571	1.28384	1.27437	0.857488	0.797243	0.931498	1.57744	1.085	1.01472	0.980557	0.825435	0.828804	0.770512	1.15997	0.731721	0.895063	0.799384	0.927436	0.736684	0.362548	0.354483
8	21.125	2	1	0.995301	0.852799	1.46531	1.33797	0.611732	0.542466	0.747197	0.601586	0.547415	1.06463	0.830538	0.980067	0.97827	0.665449	1.16475	0.290681	0.398054	1.16408	1.0758	0.726637	0.920702	0.749403	0.876149	0.888119	NaN	0.274172	0.816541	0.766277	0.597689	1.00466	0.863438	0.899791	1.08628	0.948783	0.973268	1.17081	1.02105	0.94342	1.2774	0.786509	0.961377	0.938851	0.803445	0.717612	0.644201	0.852512
8	23.25	1	1	1.20837	1.32861	0.928642	1.0831	1.5966	1.56242	1.46023	1.64967	1.50945	1.45468	1.71035	1.70419	1.75782	1.76971	1.61566	1.82851	1.90743	1.3881	1.46795	1.30661	1.49093	1.60886	1.5273	1.67853	NaN	1.72167	0.911163	1.38362	1.59608	1.57652	1.69884	1.53476	1.30492	1.1366	1.64699	1.45007	1.59292	1.66105	1.28384	1.52527	1.39669	1.71535	1.5475	1.39532	1.70498	1.79312
8	23.7	1	1	1.27722	1.30565	1.04013	0.883613	0.802787	0.767717	1.379	1.3391	1.25462	1.3421	1.39641	1.53604	1.64597	1.5778	1.57236	1.58988	1.66909	1.35317	1.13676	0.876006	1.45176	1.45363	1.2209	1.2523	NaN	1.90232	1.22698	1.40279	1.06773	1.00941	1.4047	1.45549	1.24346	1.35298	1.49774	0.731154	1.31006	1.08067	1.07091	0.77257	1.22098	0.997726	1.24403	1.26882	1.40599	1.0453
9	1.55	1	1	1.23948	1.09783	0.765199	0.338037	1.24663	1.26045	1.19645	0.920569	1.00616	0.743929	1.02588	1.1938	1.14795	1.38824	1.02049	1.59334	1.45499	1.58757	1.1254	0.86265	1.22685	1.24612	1.43017	1.27846	0.494744	0.513684	1.51936	1.77157	1.62508	1.22621	1.0111	0.969362	0.780925	1.11251	0.911574	1.17806	1.10438	1.35815	1.12215	1.16388	1.35863	0.929393	1.07545	1.00166	1.0886	0.633053
9	1.775	2.33333	1	1.1431	1.34538	0.456379	0.845558	0.938517	0.854377	0.77987	1.09373	0.494539	1.22243	0.857647	1.14349	0.817576	1.07227	0.9703	0.616117	1.01537	0.983339	0.823324	1.22693	0.881093	1.1834	1.20591	1.09623	0.268984	0.152238	1.31129	1.45645	1.00989	1.35645	0.995148	0.807965	0.960937	1.13427	1.52363	1.26171	1.1694	1.13202	1.4669	1.37602	1.50795	1.46008	0.956588	1.39913	0.91204	0.843046
9	2.6	3	1	1.175	1.11996	0.549723	0.727603	0.606104	0.760719	0.644612	0.736362	0.966163	1.05204	0.432182	0.52051	0.680426	0.732634	1.03827	0.520904	0.841369	0.230106	1.07662	0.80788	1.04876	0.700139	0.909506	0.598312	0.161468	0.190667	1.43052	0.755573	0.440146	0.509971	0.866055	0.876289	0.873054	0.787074	0.989181	1.04139	0.737035	1.02173	0.913111	0.639338	0.877296	0.716606	0.652322	0.943098	0.866786	0.590254
9	3.2	2	1	1.04535	0.700945	0.881516	0.55606	0.715104	1.33768	1.39814	1.36553	1.15871	1.32058	1.4043	1.71696	1.61452	1.70726	1.45329	1.5288	1.41092	0.957922	1.25974	1.0095	1.41521	1.20631	1.36653	1.38633	1.69677	1.80732	0.462742	1.20079	0.936301	1.01378	1.13004	1.2369	1.46031	1.17187	1.27087	0.858487	1.18737	1.00635	1.12321	0.896606	1.02318	0.78197	1.30322	1.05895	1.51619	0.554342
9	4.875	1.66667	1	0.761665	0.544016	1.11475	0.731835	1.0874	0.892751	1.21334	0.999083	1.10569	0.888277	0.65205	0.840196	0.894323	0.818244	0.915772	0.846923	0.988708	0.87994	1.15005	0.956457	0.982349	1.13094	1.03562	0.965636	1.36336	1.30739	1.24354	0.631949	1.44276	1.44542	0.842465	1.04055	0.651097	0.692866	0.809855	1.04962	0.902101	1.00693	1.02218	1.04864	1.024	1.07588	0.982556	0.662261	0.523378	0.4583
9	5.6	1	1	0.939651	1.20926	1.10912	1.09981	1.0779	1.18521	1.08386	0.897629	1.18907	1.04209	0.766846	0.576836	1.16636	1.06474	0.501254	1.08801	1.33294	1.06785	0.913772	1.7005	0.84366	0.953735	1.01708	1.24661	0.209931	0.860134	0.758953	1.02557	1.32363	0.995287	1.03603	0.826015	0.97755	1.23441	1.17348	1.12244	0.958943	0.785167	1.06751	0.896608	0.995207	1.35247	0.812621	0.799415	0.71979	0.698652
9	6.45	8	1	0.76067	1.08363	1.3472	1.65515	1.01609	1.16942	1.34266	1.28064	0.728669	0.334644	1.01436	1.08078	1.08483	1.04799	0.746413	0.642656	1.16139	0.932689	1.26998	1.3668	1.30424	1.24867	1.29185	1.19732	1.64932	1.33683	0.84806	0.953175	1.17281	1.19633	0.861844	1.15605	1.11631	0.857621	1.07143	0.709601	0.978557	0.987296	1.12976	1.13587	1.35233	1.54932	1.13096	1.27973	0.915993	1.10898
9	10	0.25	1	0.988487	0.767247	0.880113	0.631329	0.745875	0.942434	0.576953	0.783778	1.36618	1.02368	0.362932	0.627985	1.21669	1.1019	0.530946	1.01562	0.573575	0.900732	1.07119	0.803829	0.510879	0.67433	0.673433	0.564686	1.10458	1.14573	0.787914	0.7175	0.948535	1.33618	1.27181	1.03601	0.896293	0.83243	1.10882	1.20742	1.06221	0.988243	0.643196	0.763844	1.12079	0.672009	1.13781	0.800892	0.795875	0.658202
9	10.2	1	0	1.02026	0.935104	1.33884	1.20408	1.07256	1.30879	0.711336	0.563892	0.464287	0.948847	0.654357	0.442541	0.503587	0.602129	0.934465	0.621507	0.730625	0.628878	1.1924	0.916558	0.88112	0.877316	0.81812	0.798218	1.21436	0.806016	0.836698	0.546747	0.568383	0.765722	0.724236	0.908217	0.88595	0.506331	0.931858	0.666505	0.75559	0.798604	1.10843	0.75842	1.36743	1.19774	0.682375	0.711781	0.904788	1.43456
9	10.75	1.33333	1	0.729226	0.782712	1.00674	0.915266	0.873785	0.515287	0.516967	0.342485	1.24185	0.803505	0.681355	0.706654	0.593883	0.558962	0.609277	0.45579	1.15437	0.662794	0.346173	0.241792	0.480258	0.213672	0.673515	0.548138	0.674006	0.265508	0.91355	0.892219	0.796137	0.648513	1.0924	0.828155	0.679336	0.803895	1.02872	0.703964	0.619875	0.326745	0.772057	0.689959	0.562882	0.436841	0.765547	0.675718	0.574028	0.575889
9	11.425	0.5	1	0.669333	0.820177	0.622065	0.857731	0.527451	0.831849	0.427632	0.448332	0.607754	0.358486	0.396412	0.235454	0.415469	0.314456	0.308319	0.314258	0.956579	0.631773	0.744303	0.781071	0.501807	0.662074	0.656653	0.653969	0.398996	0.414814	0.6544	0.983507	0.317057	0.523037	0.658946	0.682869	0.708122	0.882544	0.583349	0.766475	0.564515	0.433243	0.600343	0.811808	0.735403	1.06198	1.01054	0.699012	0.574623	0.575587
9	12.825	0.5	1	1.3378	1.20391	1.21656	1.34396	1.27298	0.76392	1.65255	1.62416	1.35746	1.24257	1.76894	1.71832	1.61253	1.56624	1.85371	1.55674	1.3939	1.28501	1.43453	1.52668	1.48626	1.42769	1.36152	1.45787	1.49193	1.7363	0.965581	0.867725	1.75692	1.74238	1.70171	1.24187	1.34373	1.20667	1.1972	0.999257	1.34314	0.922318	1.09255	1.22201	1.51125	1.35662	1.32586	1.3584	1.16002	1.61027
9	14.15	1	1	0.743917	0.779069	1.1332	0.503085	0.799989	0.782775	0.953001	1.12702	0.677642	0.784664	1.0841	0.726606	1.22563	0.637481	1.59355	0.546025	1.03241	0.883145	0.776329	0.66707	1.17557	0.699828	0.793267	0.821083	1.69577	0.858989	0.672379	0.814034	0.983257	1.42929	0.680561	0.611488	0.825466	0.908538	0.861748	1.17528	0.535623	0.775096	0.723683	0.994441	0.604983	0.82151	0.88439	0.853017	0.659345	0.364554
9	15.025	0.333333	1	0.659111	0.706457	1.04868	0.838989	0.603033	0.616837	0.832809	0.934109	0.682581	1.40748	1.13786	0.869175	0.28548	0.525773	0.875308	0.232443	0.679445	0.611939	0.832223	1.17883	0.839261	0.466765	0.769225	0.719726	0.452714	0.264835	0.855519	0.645603	1.02114	0.955994	0.822723	0.848084	0.584027	0.643409	0.599122	0.768244	0.833294	0.844568	1.28611	1.06086	0.827606	1.12064	0.481938	0.700788	0.452453	1.32752
9	15.75	1	1	1.10986	1.12048	1.0242	0.784736	1.04147	1.24899	1.18266	1.4497	0.870713	1.61183	1.31781	1.3774	0.876879	0.982067	1.09423	1.30846	0.586071	0.624877	0.967081	1.01889	1.31504	1.34321	0.963742	0.886822	1.25924	1.256	1.08571	0.601089	1.21795	1.585	1.23466	1.06308	0.821141	0.72019	1.13446	0.877552	0.851351	1.02004	0.955998	1.03536	1.09505	0.890825	0.732772	0.910103	1.12194	1.23282
9	16.55	1.33333	1	0.935899	0.98472	1.03837	1.25448	1.23686	1.12121	1.52682	1.35328	1.25984	1.37043	1.02385	1.3551	1.47053	1.4417	1.4566	1.54271	1.0749	1.6143	0.911134	0.946845	1.22997	1.24908	1.00206	1.07714	1.45524	1.66393	1.0263	0.746882	1.58847	0.939461	1.10492	1.18714	1.30862	1.15438	1.24796	1.00815	1.0736	1.11255	1.0647	1.10996	1.22379	1.22042	0.93178	1.00466	0.562811	0.984467
9	17.175	3	1	1.35012	1.07546	1.00339	0.905235	1.36751	1.56513	1.71407	1.18466	0.731384	1.02717	1.52149	1.38147	1.46885	1.3996	1.67263	1.79808	1.53252	1.26495	1.08419	1.22735	1.51751	1.3956	1.46543	1.51282	1.72895	1.80208	0.848459	1.45871	1.30984	1.46748	1.26641	1.02815	1.109	1.25986	1.24633	1.15984	1.05472	0.918315	1.58839	1.43245	1.32751	1.30482	1.21574	1.22765	1.12888	1.40968
9	19.5	1.33333	1	0.594874	0.828127	0.561512	1.08311	0.695134	0.881921	1.17292	1.15791	0.716604	1.29	0.765847	1.00914	1.11266	0.646392	1.21677	0.683824	0.79266	0.870521	0.646747	0.826687	1.01986	0.913286	1.04846	1.08956	0.341349	0.527494	0.763271	0.77934	1.27131	0.881451	0.988269	1.07609	0.948379	1.08267	1.07591	0.983728	0.876241	0.932891	0.951639	0.755996	0.704785	1.06076	0.89732	0.946162	1.21996	1.12591
9	19.65	1	1	1.18759	1.00568	1.40134	1.31169	1.28231	0.873224	1.38519	1.16694	1.31125	1.10236	1.1321	1.00974	1.29809	1.22326	0.656584	1.04936	1.27436	0.388519	0.915367	0.929466	1.17969	1.07124	1.31551	1.13628	1.69062	1.38403	1.55447	1.26314	1.01598	0.986966	1.20905	0.843908	1.31427	1.4384	1.00139	1.26995	0.931447	1.05878	1.25413	1.07929	0.897455	0.943735	1.39188	0.71429	1.14691	0.859736
9	20.2	0.333333	1	0.99685	0.985512	1.04513	0.533405	0.753092	0.776771	0.396812	1.04198	1.42051	0.976455	0.848389	0.705551	0.582755	0.626014	0.765212	0.508462	0.7352	0.506886	1.16257	0.939515	0.67661	0.786333	0.956922	0.77521	0.294106	0.151212	0.501292	0.418345	0.67454	0.454717	0.762216	0.937721	0.877156	0.866774	0.931725	0.720405	1.27734	1.00746	1.06454	0.726397	1.20101	0.962918	0.861783	1.04964	1.17392	1.53627
9	20.525	1.33333	1	0.719359	0.836056	0.426468	0.808115	0.883016	0.898385	1.39745	1.43478	1.07675	0.971232	1.2942	1.32567	1.52813	1.52832	1.61629	1.5841	0.999677	0.880331	1.2754	0.93469	0.903482	1.07164	1.00998	1.17853	1.04679	1.35633	0.967973	1.27922	1.41988	0.815747	0.960055	0.959085	1.24009	1.11805	1.08822	0.923625	1.25128	1.13426	0.843771	0.95143	0.440732	0.632908	1.3911	0.915713	0.561787	0.638185
9	21.125	2.5	0	1.178	1.25072	1.42034	1.51909	1.13333	1.35526	1.34029	1.05545	1.20162	0.879127	1.27258	1.12861	1.55679	1.09469	1.83	1.53645	1.11655	1.64104	1.28549	1.39375	1.15755	1.16127	1.3783	1.38182	0.816353	1.05851	1.24973	0.965185	1.0943	1.14792	1.11165	1.01641	1.3432	1.12063	1.54149	0.961798	1.50166	1.43526	1.37944	1.23453	1.42433	1.66301	1.44899	1.24916	1.43986	0.82
9	23.25	0.666667	1	0.349644	0.367975	0.50003	0.841743	0.514208	0.27896	0.662327	1.06625	1.18257	1.40698	1.31896	1.02866	1.16133	1.47916	1.25497	1.10803	1.20584	0.672677	0.685471	1.00968	1.06716	1.06353	0.569799	0.649838	1.12119	0.902851	0.703683	0.264119	0.969562	0.995411	0.852902	1.25992	1.19021	1.0606	1.31689	1.09569	0.810845	1.20945	0.831677	0.998077	0.710608	0.561971	1.10371	0.795712	0.464167	0.768641
9	23.7	0.166667	1	0.851359	0.71323	1.18529	1.01291	0.72439	0.769842	1.08888	0.991162	0.714432	1.15446	0.860515	1.06487	1.34132	0.912184	1.15656	0.662239	0.477703	0.924641	0.997471	1.10072	0.703545	1.11992	0.695909	0.880208	1.78919	1.54697	0.995522	0.806552	0.757307	1.12569	0.728586	0.976495	1.06788	0.892126	1.19307	0.871557	1.04406	0.827283	1.17242	0.802058	1.17905	0.5191	1.16454	1.15894	1.32979	0.806328
10	1.55	7	1	1.24343	1.21408	0.852502	1.41891	0.996189	1.11942	0.84793	0.891632	1.64181	1.28003	1.66181	1.46683	1.25641	0.974994	1.35552	1.16254	1.44577	1.26523	1.23542	1.47139	1.57159	1.50186	1.21014	1.12881	NaN	NaN	0.960818	0.70555	0.701082	0.862229	1.18138	1.5491	1.09386	1.36448	0.761274	1.01123	1.05179	1.4312	0.792772	0.833762	1.19168	1.09278	0.575195	0.586119	0.748305	1.01005
10	1.775	8	0	1.38416	1.112	0.66989	1.04675	0.722346	1.05095	1.60597	1.76915	1.28167	1.08794	1.21171	1.43865	1.14484	1.13167	1.06049	1.3788	1.36015	1.25602	1.35179	1.14266	1.28814	1.22333	1.34726	0.998161	NaN	NaN	1.20273	1.03756	1.37814	1.22405	0.910301	0.916949	1.43171	1.31988	1.60267	1.63647	1.31583	1.23099	1.68488	1.60027	1.13757	1.10784	1.3587	1.45675	0.441475	0.474325
10	2.6	2	0	1.08318	1.14736	0.860958	0.98239	1.58704	1.30858	0.945575	0.998024	0.61835	0.785276	1.08713	0.66759	1.02841	1.16494	0.733927	1.35098	1.2172	1.0612	1.43363	0.553719	0.73827	0.836508	0.92526	1.11766	NaN	NaN	1.37662	1.42556	0.63742	0.758107	1.17712	1.20646	0.963596	1.12167	1.05399	1.09462	0.925035	0.888013	1.16234	0.753978	1.15695	1.16301	1.03454	1.12069	0.335581	0.900954
10	3.2	4	0	0.523966	0.577592	0.606614	0.567051	0.50617	0.353889	0.715625	0.97683	0.924668	1.40149	1.08446	0.552848	0.714465	1.09765	1.32571	0.440833	1.14614	0.36987	1.51476	0.462715	0.919762	0.46817	0.764648	0.760319	NaN	NaN	0.664776	0.878404	0.436281	1.04425	0.754819	0.553891	1.33712	0.652542	1.3912	1.16552	1.38153	1.2527	0.896064	0.566382	0.84055	0.511051	0.888184	0.865401	1.10157	1.177
10	4.875	3	1	1.1	1.15348	1.01642	0.876989	1.40735	1.44566	1.01221	0.869407	1.34079	0.511459	0.813224	0.578606	0.492139	0.985253	0.252973	0.624742	0.485425	0.599436	0.879181	0.872214	0.705479	0.828985	0.923919	0.871728	NaN	NaN	0.525858	0.702539	0.855298	1.13347	0.948223	1.48025	0.876065	0.929381	0.71138	0.987397	1.52807	1.27238	0.643046	0.687941	1.13652	0.969598	0.669968	0.490116	0.648839	0.686234
10	5.6	3	0	0.987697	1.15424	1.21882	0.611577	0.397032	0.790729	0.694597	1.09993	1.16083	0.429018	1.07558	0.880791	1.33886	1.18267	1.03398	1.49268	1.25715	1.55339	1.37177	1.31273	1.37147	1.13946	1.21635	1.27632	NaN	NaN	0.767152	0.518517	1.30456	1.35063	0.983353	0.952426	0.962496	1.09349	1.03539	0.886546	1.13566	0.873618	1.21087	1.11682	0.965371	1.36544	1.48658	1.29862	1.46111	1.41666
10	6.45	17	0	1.02337	1.03265	1.3063	1.28117	0.659118	0.692683	0.938876	0.985494	0.611951	0.315119	1.11308	0.930271	0.948794	0.534038	1.12081	1.15385	0.471234	0.745976	1.33407	0.749111	0.970655	0.944483	0.863485	1.00383	NaN	NaN	0.574598	0.748075	0.768181	0.448783	0.539745	0.543591	1.51463	1.10529	1.27095	1.12169	0.9722	1.07594	1.25532	1.19831	0.958608	0.882133	1.19957	0.95975	1.25821	1.17274
10	10	10	0	1.18863	1.33928	1.00893	0.32983	0.585793	0.476994	0.980632	1.01054	0.995529	0.77064	0.954345	0.604464	0.959871	1.18457	0.771737	0.390499	0.757817	0.585524	1.09165	0.68936	0.908412	0.640282	1.09759	0.913629	NaN	NaN	0.81239	1.34571	0.883611	0.959999	1.29034	1.24765	1.37295	1.49157	1.33088	1.20174	0.926683	1.21251	1.48409	1.46259	1.0849	1.21586	1.04623	1.05467	1.24672	1.37635
10	10.2	4	0	0.381771	0.336584	0.681503	0.639917	0.709656	0.578064	0.768231	0.685316	0.970353	0.534996	0.305243	0.586706	0.330224	0.365201	0.40005	0.263212	0.653014	0.745335	1.00313	0.884234	0.865892	1.02434	0.917678	0.698635	NaN	NaN	0.923069	0.885444	1.06378	0.896007	1.1098	0.735928	0.500144	0.54058	0.558706	0.489191	0.632268	0.661434	0.533994	0.412428	1.0595	0.722206	0.683389	0.500828	1.17178	0.647798
10	10.75	7	1	1.44907	1.07759	1.06948	1.21597	0.931184	0.728697	1.05704	1.38125	1.13096	0.816936	0.884999	1.16281	0.778306	1.13731	0.361186	1.47863	0.458216	1.26466	0.981503	1.07386	1.01982	1.45899	0.966383	1.14272	NaN	NaN	1.19002	1.286	1.11221	0.718934	1.47751	1.43818	0.935012	1.17799	1.3053	1.28199	1.16681	1.25153	0.729897	1.40293	1.18813	1.27809	1.18015	1.19742	0.833122	0.933534
10	11.425	3	0	0.609179	0.84362	0.3412	0.932381	0.818069	1.06295	0.924323	0.878572	1.18505	1.45944	0.575552	1.00073	1.15262	1.37738	1.34738	1.16444	1.29002	1.26314	1.14538	1.04639	0.922835	0.735135	1.23464	0.962859	NaN	NaN	1.62423	0.474716	0.669308	1.34145	1.06926	0.908857	1.30477	1.26389	1.28437	1.03173	1.14921	1.34667	0.972833	1.26175	0.892975	1.44003	1.33943	0.91015	1.63871	1.38094
10	12.825	5	0	0.881564	0.699587	1.01157	0.366366	0.681277	0.814499	1.07071	1.50482	0.821071	1.16401	0.931849	0.799668	0.810319	0.797681	1.54108	1.39057	1.43114	1.3482	1.04343	1.13952	1.09095	0.824206	1.049	1.18752	NaN	NaN	1.03528	0.72349	0.887157	1.2545	0.891686	1.03339	1.15948	1.11044	1.07247	1.03986	0.858818	0.861216	0.754299	0.942589	1.20102	1.30776	1.32638	1.11879	0.918035	0.829201
10	14.15	8	0	0.392325	0.643367	0.595729	0.48757	0.831575	0.699788	0.748844	0.551176	1.37153	1.49764	0.620764	0.641698	0.588488	0.637176	0.727202	0.921814	0.434799	0.438301	0.747646	0.442189	0.677221	0.439475	0.765506	0.722024	NaN	NaN	0.384447	0.790813	0.629808	0.523531	0.656236	0.496957	0.617347	0.773414	1.04426	0.656991	0.969559	0.845035	0.61819	0.545944	0.347281	0.304432	0.722275	0.818865	0.846574	0.441
10	15.025	5.06667	1	0.869122	0.742366	0.741114	1.05498	1.10097	1.4556	0.952537	1.03888	1.21303	1.48164	1.12045	1.27643	1.15753	1.32962	0.892927	0.554262	1.3487	0.787871	1.16116	1.07448	1.42543	1.19455	1.14972	0.80144	NaN	NaN	0.470219	1.24087	0.91086	1.23288	1.45277	0.764216	1.34629	0.888462	1.5923	0.969701	0.978412	1.17795	1.09537	1.38769	0.616465	0.556995	0.773562	0.852937	0.775887	0.544168
10	15.75	2	1	1.27002	1.06422	1.01863	1.11621	0.686587	1.31531	1.05756	1.19698	0.923427	0.932422	1.25335	0.829715	0.916366	0.901537	0.442544	0.891267	0.694729	0.737721	1.115	1.39089	1.14354	1.07087	0.994554	0.95679	NaN	NaN	0.494352	0.926612	0.994947	0.576774	1.3668	0.907012	1.23426	1.36212	0.968406	1.22524	1.09134	0.709714	1.27862	1.0665	1.43727	1.19015	0.983913	1.09181	1.54757	1.15357
10	16.55	3	1	1.51394	1.63603	1.05765	1.14901	1.11634	0.992898	0.958473	1.41226	0.751111	1.14431	1.40917	1.19375	1.09318	1.11292	1.33976	1.48051	1.16344	1.59658	1.33913	1.51168	1.20502	1.54925	1.19805	1.46729	NaN	NaN	0.78712	0.890882	1.30607	1.14629	0.644213	0.826809	1.3451	1.66009	1.22534	1.33409	1.1724	1.15925	1.57083	1.44178	1.27962	1.57463	0.943026	1.11697	0.775134	1.12384
10	17.175	3	1	1.07573	1.0424	0.956714	0.789388	1.08396	1.15814	1.13054	0.59234	0.912206	1.41596	0.36065	0.771397	0.538983	1.02676	1.58532	0.327581	1.0501	0.586068	1.37067	0.883454	1.09177	0.916351	1.04366	1.12826	NaN	NaN	0.914671	1.54237	1.24486	1.34778	1.36634	1.15449	1.02896	0.790688	1.18281	1.24645	1.18318	0.807051	0.854533	0.882345	1.10356	0.648211	0.918989	1.03617	0.470074	1.00232
10	19.5	3	0	1.51639	1.28168	1.73788	1.5405	1.21418	1.12414	0.871747	0.801777	1.06611	0.734897	1.06191	0.918625	1.09623	0.652363	0.986951	0.942939	1.28721	0.56376	1.42224	1.0233	1.342	1.06793	1.3838	1.27567	NaN	NaN	0.63233	0.698136	1.3457	0.839826	0.840342	1.29983	0.661617	0.924398	0.36191	0.745476	1.32074	1.02716	1.33167	0.963224	1.54693	1.22267	0.805974	0.811887	0.348048	1.33269
10	19.65	3	1	1.23497	1.42011	1.7945	1.64518	1.55884	1.09162	0.690272	0.940583	0.957335	0.681321	1.27001	1.1377	1.37549	1.13475	1.11105	1.17545	1.32486	0.704637	1.45352	1.22482	1.14011	1.20049	1.35173	1.31185	NaN	NaN	0.988721	0.808982	1.1532	1.35214	1.13669	1.35578	1.0219	1.06511	0.547798	1.26826	1.46527	0.91559	1.38982	1.3235	1.20841	1.26958	1.46796	1.49354	1.46915	1.52284
10	20.2	4	1	1.26057	1.12747	1.34454	1.37073	1.26217	1.49191	1.29653	1.047	1.35963	1.44173	1.0687	1.43591	1.41414	1.11423	1.49753	0.936554	1.44003	1.18177	1.49959	1.25656	1.29274	1.04939	1.2481	1.05954	NaN	NaN	1.37666	0.91661	1.602	1.55964	0.991327	1.40134	1.12127	1.21307	1.03003	1.14712	0.949547	1.26256	1.30039	1.36084	0.929309	1.31776	1.51159	1.38631	1.49328	1.21671
10	20.525	5	1	1.32318	1.47592	1.24789	0.90623	0.561568	0.733548	1.43812	1.07117	1.61388	1.58222	1.4585	1.58296	1.51729	1.03006	1.41361	1.03331	0.606496	0.605438	1.44632	1.70278	1.48471	1.55717	1.3703	1.25734	NaN	NaN	1.29556	0.927913	1.27239	1.63227	1.19247	1.35656	0.977904	0.919057	1.10677	1.00159	1.29898	1.33093	0.837801	0.625219	1.39605	1.38421	0.747969	0.97523	0.43553	0.689822
10	21.125	4	1	1.51686	1.02739	1.42638	0.957179	1.42449	1.57652	1.73679	1.62566	1.50775	1.21871	1.69365	1.77306	1.38263	1.47313	1.31374	1.4913	1.50261	1.50729	1.53216	1.55187	1.50591	1.54103	1.5458	1.3531	NaN	NaN	1.68501	1.3763	1.66217	1.61569	1.67049	1.63139	1.60785	1.33989	1.61315	1.68438	1.70049	1.47344	1.00705	1.37471	1.56288	1.43328	1.31164	1.42529	1.57558	1.52659
10	23.25	4	1	1.33022	0.989051	0.93574	0.695583	0.802297	0.635609	1.65166	1.56646	1.49663	1.47649	1.32839	0.870507	1.04224	1.19905	1.11182	1.25471	0.473851	1.09419	1.51979	1.47995	0.901162	1.04905	1.36399	1.1634	NaN	NaN	1.30859	1.25022	1.48069	1.1498	1.14629	1.17303	1.26916	1.2609	1.24422	1.22696	1.44009	1.37056	1.10901	0.992506	1.1846	1.44239	0.47815	0.715805	0.6836	0.261674
10	23.7	1	1	0.968862	0.915271	0.816169	1.03996	1.42122	1.22023	1.43708	1.28627	1.34071	1.28236	1.46774	1.51082	1.45772	1.24284	0.947516	1.30828	1.34064	1.2276	0.665272	0.903931	0.866304	0.913982	1.08331	0.996041	NaN	NaN	1.22818	0.711384	0.892688	1.45915	1.5053	0.989438	1.15071	0.856525	1.13501	1.24345	1.1672	1.25314	1.10825	1.14268	0.823115	0.905865	1.16681	0.898777	0.271489	0.556494
11	1.55	5	0	1.02175	1.07424	0.843967	0.831181	1.1707	1.47532	0.711014	0.823984	0.63661	1.40428	0.817345	1.26377	1.02349	1.00651	0.938741	1.12366	1.27186	0.689276	1.2733	1.09484	1.1756	0.892633	0.94447	0.899863	0.958296	1.58894	1.55535	1.03106	1.16479	1.25432	1.68707	1.59558	1.30948	1.22108	1.17216	1.04416	1.25434	0.768264	0.798346	0.89495	0.842712	0.948478	0.94089	0.493512	1.0247	0.981921
11	1.775	13	1	1.05283	0.819167	1.29574	1.53506	1.57611	1.27845	1.16856	1.06445	0.624954	0.506322	1.47887	1.49782	1.52918	1.13547	1.31475	1.17845	1.00918	1.45576	1.237	1.48533	1.14505	1.32038	1.25638	1.43542	0.946072	1.77878	1.34122	1.35735	1.49882	1.59058	1.376	1.32957	1.20052	1.34855	1.44414	1.2201	0.729587	0.587986	1.16775	1.36897	1.01026	0.924601	1.16301	1.02564	1.28846	0.743089
11	2.6	20	0	0.899383	0.862623	0.765115	0.776112	0.992496	1.24378	1.39992	1.43824	0.696721	1.15028	1.36162	1.57683	0.883953	0.877968	1.17315	0.942737	1.062	1.58727	1.07467	1.32232	1.37195	0.977134	1.28827	0.951246	1.58878	1.74438	1.13321	0.929137	1.13332	1.14477	1.21021	0.941737	1.24874	1.02251	1.2879	1.27087	1.27215	1.03427	1.48383	1.12868	1.55432	1.04544	1.14171	1.32852	0.777259	1.42863
11	3.2	15	0	1.32405	1.14062	0.65811	0.660281	0.883573	0.903108	0.966561	1.2013	0.988662	1.04572	1.45759	0.957226	1.16076	1.16999	1.23016	0.535599	0.584587	0.606745	0.803759	0.560203	1.17311	0.803233	0.618542	0.613469	1.03939	0.794657	0.568784	0.680428	0.798137	0.635156	0.841084	0.856775	0.772692	1.0007	0.87755	0.721862	1.17477	1.2285	0.974827	0.575667	1.15145	0.986722	0.73467	0.724249	0.885569	0.691959
11	4.875	15	1	1.41948	0.992442	1.41277	1.15572	1.07296	1.05752	1.37083	1.02541	0.8496	0.500775	0.980278	1.52978	0.83146	1.046	0.539027	1.51232	1.41175	1.49856	0.974388	1.18931	0.926965	1.30008	0.847453	0.875111	1.67371	1.60222	0.757752	0.559424	1.6202	1.70472	0.829211	0.899518	0.80175	0.96923	0.804137	1.15619	0.935569	1.33554	0.962491	1.07942	1.20699	1.31028	0.633071	0.769618	0.628783	1.72391
11	5.6	20	0	0.909697	0.933266	1.03281	0.992331	0.916985	1.18299	1.17895	0.974247	0.608891	0.675806	1.49391	1.52183	1.07189	1.32114	0.973838	1.31632	1.50986	1.13585	1.1903	1.3341	1.18335	1.25988	1.34977	1.30578	1.70014	1.46344	1.19456	1.56822	1.48903	1.62162	0.61381	0.892751	0.907192	1.15456	0.783551	1.04194	0.855261	0.999782	0.493531	0.879619	1.30958	1.22587	0.993001	1.50054	1.09099	1.14906
11	6.45	25	0	0.946918	0.640889	0.982509	0.646074	1.37572	1.14721	0.771872	0.501384	1.22236	1.39922	0.391111	0.613847	0.592514	1.17613	0.352569	1.0663	0.656444	1.13518	0.543551	1.1591	0.869291	0.862904	0.70905	0.799675	1.54274	1.53292	0.418144	0.581582	0.199735	0.654216	0.656682	0.750934	0.819907	0.745133	0.732272	0.889192	0.890442	0.634417	1.18151	0.573076	0.725789	1.04121	0.838691	0.650782	1.00137	0.927015
11	10	3	0	1.15339	1.19056	0.950533	1.17799	1.13358	0.978477	1.429	1.00348	1.14976	0.791234	1.48939	1.40809	0.865304	1.46129	0.713783	0.703544	0.554344	0.786374	0.797392	0.805228	0.727094	0.760381	0.727612	0.889207	1.28813	1.2064	1.04408	1.17163	1.61728	1.21084	1.2119	1.36634	1.36464	1.2133	1.34894	1.17538	1.1554	1.06914	1.04735	0.979422	1.25188	1.03163	0.673607	1.16187	1.50807	1.0322
11	10.2	17	0	0.688704	0.972634	1.11491	0.882391	1.23804	1.32055	0.912757	0.984311	0.965845	1.17578	1.09036	1.538	1.00286	1.52493	0.552847	1.75739	1.35316	1.60054	1.0424	0.868468	1.14426	1.24355	1.37911	1.35591	1.63162	1.80614	1.2768	1.3976	1.27503	1.47818	0.900566	1.227	0.910552	0.861922	0.868482	1.1516	1.12678	1.11824	1.05259	0.991212	1.06094	0.902183	0.724899	1.09238	0.799675	1.49248
11	10.75	10	1	1.22031	1.19827	0.820181	0.980103	0.761971	1.04248	0.649533	0.494465	1.34978	0.6838	0.537246	0.84297	0.575021	0.484024	0.989778	0.580686	0.821464	0.75801	0.621694	0.660585	0.854498	0.79828	1.10698	0.802455	1.68201	1.28777	0.989723	0.93652	0.907652	1.32707	0.815086	1.09058	0.869551	0.940129	1.02619	0.935819	1.07736	0.49779	1.17917	0.636985	1.16587	0.731061	0.848112	0.57344	1.08254	0.502556
11	11.425	12	0	0.801274	1.0399	1.60676	1.37858	1.02064	0.947995	1.05949	0.863946	0.843961	0.834485	1.41374	0.981934	0.808782	1.17385	0.361865	0.925133	0.346364	0.520888	0.656942	0.215009	0.498798	0.364172	0.393752	0.343696	0.756251	1.16151	0.902501	0.594567	0.738598	1.44327	0.973969	0.663366	0.92348	1.03704	0.931118	1.01844	0.797922	0.802673	0.383269	0.567228	0.604108	0.785583	0.520336	0.835658	1.18717	0.71376
11	12.825	15	0	1.51886	1.50893	1.34628	1.49175	1.23989	1.01935	1.55249	0.971661	1.29406	1.06926	1.84765	1.66807	1.15895	0.829786	0.952895	0.575777	1.22985	1.10741	0.752054	0.934461	1.16804	1.35476	1.11675	1.18633	1.8677	1.83529	1.03874	0.935266	0.733115	0.824244	0.870229	1.25902	1.03299	0.789808	1.18158	0.963368	1.35569	0.981166	1.32219	0.97746	1.45384	1.05483	0.995092	0.990988	0.87333	0.446987
11	14.15	10	1	0.656253	0.949206	0.360546	0.610743	1.41202	0.975276	1.02188	1.34055	1.12953	0.964233	0.12942	0.27521	0.612723	0.882095	0.505022	0.713194	1.29187	0.43354	1.2419	1.43445	0.991407	1.16204	0.806445	0.882127	0.407336	0.296604	1.22357	0.908171	1.43657	0.946686	1.31479	0.851482	1.16296	1.05378	1.42724	1.45183	1.05469	1.23735	1.34709	1.48915	0.688943	0.853081	1.09719	1.14542	1.0505	1.35918
11	15.025	5	1	0.491671	0.685161	0.522666	0.464932	0.819151	0.463513	1.21092	0.648381	1.40973	0.682601	0.216958	0.452105	0.361951	0.691725	0.505626	0.668148	0.847445	0.469709	0.442259	1.2134	0.716216	0.782449	0.461708	0.625243	0.194185	0.304396	0.359276	0.780671	0.984903	1.02325	0.600234	0.507386	0.861804	0.858592	0.660025	0.526891	0.614775	0.842806	0.46801	0.749094	0.78717	0.954172	0.411922	0.75703	0.884113	0.935662
11	15.75	4	1	0.919181	0.857006	0.888559	1.17345	0.771238	0.762979	1.04531	1.13056	1.42905	1.20306	1.23022	0.909106	1.14766	0.896999	0.619728	1.17875	1.11133	0.512894	0.670577	0.468945	0.610261	0.545337	0.745178	0.490975	1.32528	1.11526	0.985398	0.801218	1.1827	0.537703	0.289533	0.23905	0.603498	0.451185	0.444431	0.448815	0.662718	0.613568	0.492124	0.348681	0.74961	0.616318	0.763264	0.715764	0.985925	0.485766
11	16.55	6	0	1.2228	0.807021	1.20637	0.996198	1.18789	0.839884	0.473917	0.631967	1.03873	1.10672	1.23426	1.30465	0.761535	1.23392	0.695973	0.762989	0.76983	1.0322	1.03808	0.905263	1.03052	1.04211	1.39128	1.25244	0.401186	0.871946	1.49506	1.58237	0.486088	1.28172	0.889032	0.717731	0.935523	0.808903	1.1896	0.945814	0.860059	0.580482	0.875476	0.935627	1.14554	0.865895	0.70382	1.15438	0.429388	0.569515
11	17.175	6	0	0.884976	1.07586	0.972893	0.792853	1.25782	1.32394	1.50452	1.35353	1.20701	1.41029	1.49203	1.6536	1.27244	1.53568	0.656706	1.62902	1.21114	1.41978	0.849904	1.12268	1.21987	1.48496	1.13826	1.16014	1.00494	1.83028	1.44385	1.39211	1.40511	1.33036	1.28342	1.36072	0.906542	0.849268	1.36198	0.845464	1.29338	1.15609	1.24854	0.81426	1.01397	0.742217	1.14599	1.20521	1.55064	0.61029
11	19.5	16	0	1.03763	0.858615	1.21626	0.869676	1.07682	1.34851	0.743212	0.848668	1.05013	1.39384	1.17302	1.41728	1.07463	1.01709	1.26799	0.990544	1.15674	0.752135	1.12776	0.970288	0.802312	0.736289	0.91598	0.821835	0.31149	1.54834	0.901959	1.13364	1.49432	1.21019	0.877513	0.980239	0.866857	0.593777	0.656482	0.569964	0.747791	0.923293	1.12762	0.673196	1.05864	1.2363	0.922253	0.848199	1.37751	0.941691
11	19.65	2	1	1.00375	0.821407	1.03257	0.902058	0.618865	0.49514	0.670645	0.519825	0.719572	0.320465	1.12742	1.16552	0.932169	0.714275	0.936005	0.62307	0.575293	0.596965	0.377141	0.815607	0.677817	0.792325	0.841292	0.683491	1.53387	1.68988	0.339731	0.508829	0.99397	1.31181	0.985836	0.947764	0.762586	0.944838	0.69935	1.28711	0.619268	0.894729	0.674378	1.2975	0.613574	0.930087	0.945464	0.615441	1.30794	0.440891
11	20.2	3	1	1.41838	1.53506	1.75068	1.67851	1.5574	1.60785	1.1491	1.3143	1.21197	1.20991	1.6219	1.3109	1.25867	1.21943	1.35067	1.44865	1.27013	0.983363	1.10817	0.981554	1.16798	1.22289	1.46261	1.3367	0.374778	1.52712	0.887986	1.21565	1.60135	0.613101	0.900124	1.14905	1.06598	0.967973	1.06006	0.892949	1.19135	1.23996	1.02841	1.25462	1.03405	1.07212	1.36684	1.43932	1.13909	0.811482
11	20.525	7	0	0.880735	0.844688	0.981896	1.05863	0.713147	0.548847	0.785166	0.970492	0.679459	0.6804	1.59483	1.44835	1.36901	1.035	1.35077	1.01773	1.02246	0.617786	0.613749	0.532755	1.02048	0.609124	0.643492	0.529001	0.195727	0.926658	0.91331	0.576721	1.69333	1.84712	0.742695	0.68232	0.904923	0.620889	0.857754	0.674298	0.916026	0.954009	0.438368	0.575976	0.989094	0.903018	1.03235	0.722856	1.17362	0.477641
11	21.125	3	1	1.32515	1.29388	1.09615	1.27578	1.05123	1.00047	0.887995	1.06778	0.917242	1.21959	1.36662	0.86959	0.748922	1.0537	0.825792	0.756154	1.47557	1.31176	1.03771	0.757428	0.830099	0.626582	0.883944	0.881441	0.142734	0.661098	0.598962	0.88267	0.73374	1.23105	0.905801	1.17642	0.792362	0.661003	1.0442	0.646131	1.04052	1.0534	0.819478	0.524053	1.29091	1.2573	0.968973	0.755739	0.982516	1.24069
11	23.25	2	1	0.917778	0.98804	0.61528	0.96617	0.756091	0.554352	1.16448	1.48213	1.5317	1.68288	1.25179	1.54529	1.51556	1.48601	1.40218	0.846188	1.3777	1.39558	0.963832	1.28777	0.910892	1.23174	1.12871	1.03213	0.158722	1.64536	1.10454	1.16683	1.53159	1.84226	0.904091	0.709603	0.921462	1.11262	0.804759	1.02657	1.38757	1.25583	0.545983	1.21903	0.740016	1.12601	0.724608	1.21337	0.864394	1.04761
11	23.7	3	1	0.424133	0.472976	0.919662	1.00925	0.522432	1.09031	0.642485	0.701553	0.984966	0.354182	0.357915	0.541623	0.549505	0.691947	0.798925	0.766707	0.447985	0.487452	0.777204	1.22624	0.73647	0.816399	0.674491	0.739171	0.334982	0.367219	0.990456	0.644787	0.908932	1.48369	0.697709	0.763196	1.14774	1.05772	0.987456	1.10315	0.76736	0.659879	0.97899	0.714078	0.23066	0.390807	0.769373	0.588578	0.832314	1.39368
12	1.55	2.25	1	0.927716	0.932462	0.569538	0.406069	1.21052	0.696871	1.01	1.08111	1.36356	0.678407	1.28512	1.12954	0.776918	1.15338	1.04253	1.53842	1.30213	0.904647	0.910909	0.884566	0.902736	0.714227	0.662719	0.750315	1.01272	1.04727	0.879206	0.449614	0.864533	1.07198	1.40655	0.709765	1.23761	0.810711	0.995748	1.30795	1.2961	1.28912	1.05097	1.1716	1.10142	1.13415	0.767769	0.998458	1.12684	0.400001
12	1.775	5	1	1.04822	1.09441	0.77967	0.476462	0.978678	0.660319	0.933579	0.810293	1.27746	0.899621	0.753045	1.09487	0.957837	1.27746	1.29468	1.13753	1.28904	0.82313	0.698519	1.03086	0.896957	0.853006	1.11782	0.848501	1.57527	0.786212	1.41405	0.851469	1.36158	0.936936	0.556541	0.611182	0.857523	1.05399	1.10108	0.955064	1.26646	1.09775	1.50216	0.992802	1.47001	0.78057	1.46166	1.19871	0.52715	0.986787
12	2.6	0.0333333	1	0.793453	1.34146	1.4336	1.38534	0.604714	0.938622	0.758509	0.654859	1.4098	0.796496	1.56216	1.36367	1.77787	1.35513	1.07886	1.20208	1.09158	1.15663	0.9755	1.06438	1.4609	1.52897	1.23565	1.20429	1.85422	1.87852	1.30658	1.17685	1.38552	1.3362	0.822932	0.96544	1.42787	1.12658	1.33411	0.877959	0.903706	1.15932	1.2228	1.2227	0.828169	1.16806	1.09685	1.05667	1.18657	0.91093
12	3.2	3	1	1.1421	1.67674	1.45031	1.63335	0.624675	1.50373	1.07043	1.57203	0.82643	1.3357	1.22592	1.39771	0.923595	1.32187	1.22868	0.989721	1.51772	1.25157	1.06309	1.33161	1.09391	1.25568	1.12755	1.499	1.24136	1.46227	1.08938	1.44032	1.49833	1.56626	0.635461	1.6071	0.98542	1.04957	1.10545	1.41903	0.78291	1.47499	1.38846	1.48173	1.24918	1.29126	1.50184	1.30821	1.09986	1.47625
12	4.875	12.05	1	1.19008	1.12096	1.07827	0.700253	0.931994	0.728463	1.14725	1.41529	0.927419	0.674818	1.66387	1.24033	1.35609	1.59772	1.62132	1.04913	1.54056	1.27065	1.2696	1.39981	1.24835	1.24202	1.13007	1.17914	1.85806	1.26492	0.973893	1.29609	0.879632	0.992844	0.940882	0.851149	1.41003	0.988286	1.15101	1.12447	1.16037	1.2134	0.954024	1.15597	1.0237	1.41153	1.274	1.31514	0.898785	0.768741
12	5.6	5.5	0	0.779852	0.700579	0.892917	0.527051	1.05784	0.653712	0.756894	0.716434	0.870528	0.437113	0.726013	1.125	1.08964	0.965834	1.25578	0.611986	0.830571	0.328516	0.561365	0.433972	0.745336	0.693275	0.700111	0.779202	0.77889	1.02915	1.26338	1.68416	0.569632	0.667947	0.411641	0.287331	0.740501	0.678059	0.555155	0.686039	0.979177	0.76408	0.975358	0.832511	0.813231	0.756472	1.01112	0.814047	0.610213	0.576056
12	6.45	2	1	0.821071	0.734742	0.511069	0.799142	0.730339	0.738271	1.07741	0.684696	0.920533	0.511469	0.388954	0.313859	0.969886	0.544288	0.915978	0.40691	0.266801	0.33425	1.01978	0.882805	0.570087	0.598885	0.822147	0.913533	0.292915	0.134376	1.06626	0.852072	0.370783	0.989942	0.652367	1.05158	0.663651	0.729693	0.574127	0.51721	1.06623	0.883852	0.850015	0.800529	1.0851	1.04109	0.768573	0.675656	0.364779	0.700223
12	10	3.2	1	1.06383	1.19684	1.35805	1.32736	1.44691	1.00073	1.00611	0.957457	1.17011	0.79181	0.852954	1.04585	1.30283	0.94024	1.39328	0.988189	1.25089	1.39892	0.894328	0.694479	0.946893	1.0903	1.05914	1.06531	1.23806	0.792888	1.51801	0.871906	1.04104	1.0404	1.30064	0.855175	0.909925	0.883984	0.897364	0.763436	0.707805	0.707617	1.00033	0.61959	0.751481	0.874054	0.86538	0.65997	0.496798	0.707855
12	10.2	7.03333	0	0.734294	1.33118	0.673299	0.800511	0.512507	0.71207	0.832934	0.623434	1.01911	1.00152	1.00429	1.51422	0.649963	0.795273	1.22582	0.622679	1.06314	0.969439	0.719079	0.93994	0.892533	1.06754	0.754149	1.09092	1.34938	1.48198	0.631243	0.60982	0.73922	0.887852	0.538672	1.25133	0.921296	1.2831	1.02979	1.02284	0.65383	0.811736	0.726928	0.782417	0.441632	0.823401	0.849938	0.727466	0.965737	0.396551
12	10.75	6.66667	1	0.760702	0.896084	0.972198	0.491062	1.07469	0.90534	0.680292	0.546032	0.937344	1.22144	0.613736	0.766002	0.71322	0.496258	0.55628	0.4973	0.647803	0.653926	0.564669	0.696216	0.627368	0.88878	0.602569	0.911418	0.635299	0.808553	0.902882	0.949665	0.558702	0.25483	1.14737	0.692099	0.772866	1.01507	0.549456	0.824524	0.903348	0.949301	0.632864	0.8095	0.666968	0.838015	0.896857	0.753647	0.496222	0.586726
12	11.425	0.75	1	1.37205	1.25115	1.21581	1.42325	0.695732	1.25748	1.12203	0.779481	0.680462	0.860516	0.641395	1.027	0.883609	0.756211	0.816484	1.3017	1.13694	1.27957	1.3187	1.14015	0.93921	1.24721	1.48345	1.33505	1.61523	1.43424	0.875374	0.91878	1.05357	0.585045	0.459761	1.16065	1.01079	1.07807	0.995823	1.10686	1.07963	1.06204	1.23628	1.12766	1.15695	1.10594	0.634061	1.17184	0.794474	1.1079
12	12.825	3.25	0	0.824446	1.0964	0.866243	0.694963	0.921581	1.13118	1.61305	1.39832	1.18642	1.42407	1.49636	1.3707	1.41836	1.45926	1.23503	1.39531	1.62986	1.74341	1.09366	1.0622	1.61923	1.37764	1.04851	1.07601	0.788827	1.13306	1.03158	1.00432	1.38824	1.1891	1.07662	0.750663	1.19115	0.988383	1.3185	0.843884	0.986359	0.847797	1.5757	1.07586	1.27955	0.918861	1.22157	1.14146	0.903	1.10549
12	14.15	0.833333	1	1.0902	0.884623	0.832751	0.902501	1.33567	1.41413	0.966112	1.10905	1.4945	1.04977	1.09605	1.09992	1.38567	0.847493	1.07421	1.05746	1.20054	0.940292	1.12626	1.42691	1.11387	0.829372	0.802993	0.768189	1.14072	0.625985	0.839537	1.18959	1.09957	0.727136	0.99606	0.507514	1.08687	1.26205	1.04476	0.944832	1.25768	1.2362	0.907904	1.22659	0.945102	1.2211	1.05858	0.997199	0.955776	1.43269
12	15.025	0.75	1	0.724666	0.8747	1.01756	1.18546	0.969119	0.788476	0.581398	0.385568	0.599219	1.09623	0.905119	0.358998	1.09717	0.549157	0.557166	0.353759	0.730761	0.494865	1.00174	1.1071	0.562735	0.443125	0.505508	0.559393	0.228303	0.580764	0.819477	0.223517	1.21952	0.90923	0.689568	1.00714	0.837929	0.994207	0.478181	0.578115	0.813125	0.915564	0.530295	0.612476	0.802487	0.479444	0.57465	0.55668	0.204708	0.244748
12	15.75	6	1	0.676702	0.664822	0.965165	1.34384	1.35919	1.01596	1.2412	1.34299	0.771056	1.15735	1.10635	1.57284	1.46427	1.5441	1.24261	0.694412	1.29608	1.04041	1.15093	0.877376	1.26043	1.18284	0.894998	0.880276	0.643063	1.66563	0.902188	0.974339	0.935128	0.945254	1.30086	1.28906	0.843394	0.995619	1.0001	0.537162	1.35136	1.23517	0.778289	0.99223	1.42675	1.2518	1.2021	1.31694	1.25745	1.11737
12	16.55	3.75	0	0.798257	1.30594	0.86458	1.18148	0.705864	0.875833	0.95343	1.0016	0.915518	1.02177	1.45594	1.54806	1.56409	1.39374	1.30925	1.78065	1.18219	1.23721	0.50878	1.12031	1.07148	1.07035	1.26008	1.2673	0.977643	0.613697	0.912309	0.972853	1.19636	1.45964	0.682575	0.964228	0.72742	0.846404	0.768518	0.89053	1.16664	1.29685	0.724813	1.12028	0.975023	1.2104	1.32784	1.35122	0.534764	1.37435
12	17.175	0.416667	0	1.33195	1.36649	1.27415	1.40391	0.950242	1.11778	0.579922	0.557009	0.348207	1.09781	1.20532	1.06886	0.467071	0.701038	0.774376	0.195699	1.25233	0.427672	0.410689	0.726655	0.920479	0.72028	0.707406	0.716305	0.90175	0.16178	0.336333	0.580314	0.496036	1.30626	1.2603	0.45836	1.42653	1.07936	1.26056	0.954293	1.14335	1.11534	1.07623	0.826486	0.736571	0.602945	1.18985	0.985753	0.733707	0.666716
12	19.5	8.5	1	1.20976	1.23235	0.574619	1.05121	1.28559	0.960443	1.06674	1.0181	0.687273	0.7119	1.09378	0.586881	0.91028	1.11028	1.13641	0.770722	0.54174	0.88374	1.19935	1.19316	0.958085	1.10806	1.04566	0.954769	1.63467	1.55448	0.636803	0.482812	0.567649	0.439843	0.827757	0.718751	1.36969	1.39602	1.10407	0.925571	1.2425	1.22896	0.797506	0.883704	1.21131	1.25516	0.959087	0.74721	0.850679	0.944772
12	19.65	0.233333	1	1.40541	1.58512	1.28263	1.4851	1.06848	1.42429	1.1357	1.26195	0.884117	0.546584	1.31569	1.05531	1.35731	1.5032	1.04457	1.1314	1.47421	1.33601	1.30232	0.915484	1.35926	1.27001	1.40319	1.2553	1.83999	1.23023	1.22006	1.32775	1.14035	0.537071	1.34131	0.900069	1.59685	1.12479	1.4677	1.19241	1.34082	1.30036	1.1978	1.14585	0.937879	0.713362	1.31682	1.11819	0.83018	1.23238
12	20.2	8.5	0	0.940749	0.766313	1.07418	0.956905	1.52499	1.14526	1.27641	1.20123	1.43673	0.779451	1.57827	1.36854	1.2099	1.11864	1.32325	0.932362	0.830315	0.979551	0.940071	0.874725	1.03587	0.913984	1.0951	1.00008	1.86777	1.79457	1.43488	1.16701	1.45713	1.32405	1.37928	0.574636	1.1465	1.28335	1.34645	1.2396	1.00133	0.78552	1.08705	1.05096	0.924236	1.1832	1.41856	1.04181	1.47678	1.16005
12	20.525	3.5	0	1.11184	1.15504	0.585828	1.51179	0.363031	0.631433	0.919329	0.845022	0.782392	0.847551	1.30664	1.73671	1.03338	1.05564	1.1161	1.07878	0.751051	0.708772	0.831491	1.13017	0.678968	0.940229	0.968914	1.08329	1.23472	1.48999	0.310735	1.22705	0.555434	0.929429	0.453171	1.36809	1.08776	0.742553	0.516883	0.767528	1.24945	1.19683	0.727614	0.968201	0.948941	1.2373	0.994642	0.996041	0.400992	0.678943
12	21.125	0.75	1	0.758052	0.858098	0.95045	0.73221	0.897331	0.425155	0.876337	0.8776	1.15125	1.13437	0.572609	1.13051	1.40943	1.10542	1.13463	0.927194	0.769611	0.962264	0.877545	0.869101	0.953475	0.907769	0.977197	0.915383	0.738026	1.40452	0.681305	0.832685	1.28884	0.622879	0.86709	0.656092	0.779332	0.76363	0.892578	0.929752	0.740666	1.04756	0.852427	0.69065	0.824065	0.842383	1.24286	1.01551	0.664344	1.05836
12	23.25	4.33333	0	1.65306	1.25793	1.80474	1.67523	1.77889	1.48619	1.23182	1.69695	1.35253	1.52209	1.36143	1.44946	1.22677	1.71492	1.75829	0.89827	1.31264	1.36946	1.50305	1.24608	1.57322	1.59442	1.65648	1.64674	1.67891	1.25064	1.6389	1.36708	1.70209	1.68924	1.79965	1.07638	1.38326	1.33897	1.3192	0.783923	1.4598	1.17659	1.51926	0.911433	1.48782	1.23663	1.6325	1.66912	1.45155	1.55199
12	23.7	0.75	1	1.52162	0.827381	1.0992	0.922895	1.76091	1.40295	1.19533	1.77751	1.61543	1.44341	1.39897	1.71822	1.18698	1.69014	1.37887	1.71013	1.41323	1.48424	1.47137	1.30988	1.2991	1.53904	1.45774	1.73445	1.20933	1.32976	1.57412	1.5082	1.47428	1.5388	1.74949	1.43998	1.48973	1.48648	1.28455	1.21415	1.60951	1.17059	1.44093	1.37799	1.33452	1.53753	1.49973	1.64374	1.66255	1.41422
13	1.55	3	1	1.25002	1.36866	0.716339	1.00906	0.595324	0.664232	0.525326	0.607799	1.03706	1.1201	0.773458	0.523434	1.30997	1.02684	1.41229	1.24105	0.964781	0.605324	0.867478	1.12652	0.720512	1.22617	0.843493	0.538081	NaN	NaN	0.956452	1.08836	0.991987	1.20821	1.56189	1.49888	1.0835	0.832379	1.33764	0.968357	1.28333	0.968131	1.45232	1.13248	0.957462	1.06196	1.31745	1.25134	0.512917	0.774806
13	1.775	1.5	1	0.959483	1.11942	0.714045	1.16777	0.398852	0.648474	1.22143	0.848009	0.804931	1.33233	0.92526	1.43146	0.900238	1.14932	1.45745	1.30077	0.941748	0.834217	0.947815	0.85004	1.16033	1.08493	0.699423	0.476175	NaN	NaN	0.600804	0.450934	1.08773	1.14897	0.632796	0.929714	0.689231	0.702073	0.759412	0.818901	1.35375	1.22623	0.568496	0.427506	1.13966	0.685688	0.760939	0.528624	0.392885	0.593081
13	2.6	5	1	1.63366	1.38656	1.62232	1.61154	1.23472	1.39983	1.41135	1.55715	1.56254	1.48169	1.06511	0.597018	1.32156	1.41644	1.75105	1.81862	1.60296	1.17239	1.63466	1.48078	1.33139	1.53574	1.33176	1.39208	NaN	NaN	1.35934	1.10538	1.37654	1.21026	1.11611	1.25857	1.50943	1.26454	1.22008	1.04947	1.48643	1.12153	1.78365	1.32283	1.55555	1.48973	1.25267	1.16742	0.933419	0.762429
13	3.2	3	1	1.24354	1.13692	0.643894	0.7121	1.23447	1.08425	1.15526	1.06318	1.11013	1.55955	0.647228	0.687633	0.522059	0.685136	0.784513	0.562177	0.416271	0.30463	0.682175	0.473283	0.710467	0.598419	0.625941	0.510377	NaN	NaN	0.8282	0.32147	0.563639	0.534102	1.59421	1.495	0.905726	1.01491	1.08571	0.564066	0.878697	0.963129	0.727247	0.580256	1.15822	0.856988	1.09572	0.75469	0.673266	0.647674
13	4.875	1	0	1.12186	0.770678	1.38108	1.25783	0.931749	1.15713	1.24174	1.60568	1.1087	1.36579	1.10241	0.873151	1.20071	1.01203	1.033	1.11586	0.758336	1.2249	1.64252	1.55973	1.39857	1.50337	1.30918	1.29657	NaN	NaN	1.07269	0.927776	1.15371	1.37612	0.880417	0.919061	0.793772	1.26984	0.931264	0.946229	1.01561	0.769334	1.04198	1.31148	1.25325	1.12993	0.922104	0.928172	0.822442	0.854753
13	5.6	3	0	0.67477	0.802465	0.824454	1.30874	1.29638	0.93905	1.21369	1.0545	1.09814	0.579169	1.07329	1.03453	0.835479	1.04543	1.50129	1.09112	1.18846	0.935156	1.48507	0.816554	1.48348	1.186	0.805388	0.924788	NaN	NaN	0.905657	0.887354	1.18073	0.638683	0.924866	0.69645	1.39302	1.32092	1.31363	1.36675	1.24008	1.10965	1.17812	0.815192	1.16125	0.68513	1.08445	1.01725	1.45963	0.483551
13	6.45	1	1	0.683361	0.700542	0.619428	0.505618	0.576804	0.73859	0.897787	1.35959	1.09102	0.802023	0.979064	1.28653	1.17631	1.48852	1.82361	1.62863	1.33016	1.58229	0.971291	1.34851	1.0983	1.31088	1.36011	1.29686	NaN	NaN	0.720994	1.26062	1.26865	1.45387	0.786807	1.23024	1.00591	1.03611	1.10529	1.11137	0.852367	0.84566	0.782939	0.861165	0.920755	1.10773	0.653486	0.938413	0.739442	1.01249
13	10	2	1	0.408938	0.686323	0.588422	0.775594	0.706769	0.574185	0.980898	1.19519	0.811427	1.15059	0.958795	0.962175	0.882253	1.2301	1.2163	1.37989	0.931266	0.873954	0.952856	0.572112	0.934489	1.08884	0.889851	0.776955	NaN	NaN	0.533389	0.790287	0.876843	0.676143	0.88134	1.20906	0.851062	0.688177	1.08239	0.835623	0.747321	0.580563	0.871232	0.389038	0.747878	0.331838	1.2781	1.41205	0.845137	1.1638
13	10.2	3	1	0.976738	0.721078	0.640958	0.775733	0.97823	0.899649	1.07447	1.4566	0.916777	1.2819	1.12115	1.53087	0.889331	1.15628	1.13787	0.645244	0.596966	0.73094	1.12129	0.654646	0.951535	0.457397	0.95747	0.649302	NaN	NaN	1.0208	0.857891	0.624048	0.756335	0.993385	1.30367	1.01866	0.861186	1.09996	0.744065	0.623029	0.371184	1.20534	0.626198	1.18296	0.470186	1.049	1.01369	1.34083	1.2644
13	10.75	2	1	0.973877	0.971992	0.955598	1.10894	1.12691	0.782276	0.95167	0.727439	1.00892	0.781074	0.909615	1.2688	0.891015	0.754292	1.40685	0.651788	1.37931	0.936788	0.678414	0.595091	0.957901	0.447883	1.21204	0.67889	NaN	NaN	1.04903	0.679688	0.612316	0.771595	1.24682	0.764156	1.00806	1.24296	0.799757	1.26003	1.06769	0.834404	1.21518	1.03027	1.02514	0.890223	1.08807	1.09995	0.726542	0.544936
13	11.425	1	1	0.675956	0.560892	1.06051	0.967424	1.56039	1.40729	1.38918	0.857488	1.327	1.23867	0.952627	1.31308	1.56345	1.44825	1.57725	1.4419	1.12949	0.554677	1.45456	1.10919	1.38409	0.923597	1.28519	1.11348	NaN	NaN	0.829348	1.20671	1.13083	0.918462	1.52678	1.02564	1.31663	1.4586	1.37556	1.27046	0.88632	0.982007	1.30322	0.987694	1.1599	0.907179	1.01102	0.898792	1.40436	1.23432
13	12.825	2	1	0.91526	1.17334	1.6573	1.68909	1.39495	1.43495	0.710868	0.949548	0.949082	1.05503	0.755048	0.536678	0.897474	1.37265	0.829777	0.509947	1.01011	1.40216	0.807778	1.06966	1.04715	1.14159	0.787966	1.20995	NaN	NaN	0.9944	0.683825	1.2536	0.987762	1.12114	1.30589	0.801372	1.16815	1.02536	0.956155	0.795081	1.14641	1.02313	1.09078	0.962732	1.23313	0.749203	0.843701	1.24551	1.14712
13	14.15	3	0	1.22611	1.13148	1.6571	1.43759	1.03916	1.12482	0.681159	0.506666	0.85042	1.33485	0.294149	0.437522	0.665516	0.661357	0.472524	0.899882	0.546977	0.378322	0.833653	1.08667	0.706117	0.594122	0.651403	1.01195	NaN	NaN	1.07849	0.907467	0.770367	1.18559	1.28433	0.973586	0.895213	0.760768	0.985708	0.748391	1.30927	1.0859	0.697391	0.628115	0.891751	0.934918	1.04999	0.742417	1.17023	0.712421
13	15.025	1	1	1.11371	1.13563	1.12072	1.34048	0.866359	1.07041	0.480185	0.235811	0.784935	0.812797	0.790933	0.369622	0.594474	0.619346	0.899459	0.688816	1.07743	0.98465	1.16701	0.900228	1.31517	0.845658	0.989311	0.851762	NaN	NaN	0.810448	0.582406	0.900617	0.921608	0.414932	1.21739	1.09313	0.758292	0.97199	1.0248	1.11995	0.78202	0.954986	0.980475	0.982717	0.751468	0.649334	0.846412	0.657625	1.14539
13	15.75	0.5	1	1.66752	1.51389	1.1784	1.11799	1.17101	1.414	1.66354	1.68772	1.65545	0.93945	1.4102	1.30055	0.960344	1.27819	1.13876	1.12999	1.49117	1.6917	1.2525	1.02135	0.988058	1.27579	1.14065	1.39756	NaN	NaN	0.783716	0.8853	1.0383	1.27462	0.663817	1.11903	1.01426	1.27767	1.12011	1.12982	1.62654	1.36903	1.10734	1.13474	1.50393	1.36154	1.0101	1.06667	1.52989	1.04085
13	16.55	2	1	0.832979	0.859564	0.938759	1.05172	0.723412	0.954077	1.69287	1.66921	1.43724	0.804267	1.44027	1.10815	1.16008	1.4689	1.32188	1.28026	1.26551	1.38685	0.580649	1.13002	0.787939	1.11453	0.810998	1.16015	NaN	NaN	1.24713	1.53129	1.34646	1.40393	1.00529	0.758221	0.94162	1.52021	0.866937	1.36456	0.710883	0.688893	0.710575	1.13879	0.503321	0.894782	1.08644	1.03435	0.905468	1.04825
13	17.175	1	1	0.792771	0.909085	1.0474	1.41553	0.961838	1.05015	1.28395	1.50815	1.05421	0.770494	1.27117	1.18309	1.194	1.1353	1.18636	1.01906	0.986253	0.974884	1.16436	1.13807	1.10535	1.13814	0.830816	1.01589	NaN	NaN	0.659272	1.0426	0.994805	1.1627	1.16557	1.09276	0.93773	0.868142	0.531896	0.808079	0.739306	0.81561	1.19959	0.98596	0.787862	1.01279	1.23735	1.26942	0.912098	1.3186
13	19.5	0.5	1	1.2257	1.09135	1.00767	0.855247	0.859645	0.969724	1.07443	0.926433	1.1619	1.05112	1.28144	1.07735	1.12593	0.994221	1.59562	1.03866	1.12341	0.848562	1.14708	0.942995	1.47817	1.15119	1.10668	1.24279	NaN	NaN	1.0075	1.17695	1.07244	1.33231	0.749024	0.759358	0.943616	0.727074	0.76977	0.665325	0.490195	0.558026	0.731449	0.749046	0.985107	0.918469	1.31076	1.03536	1.07224	0.540719
13	19.65	0.75	1	0.993668	0.928833	0.390784	0.598967	0.62357	0.956097	0.884697	0.823869	0.75434	0.710249	1.18234	1.28999	0.620583	0.729833	1.36946	0.57217	1.03185	0.635753	0.797467	0.546524	1.16608	0.897881	0.979933	1.15409	NaN	NaN	0.512859	0.63473	0.677668	1.14945	0.887262	0.836815	0.723979	0.756284	0.81833	0.954551	1.00586	0.914894	0.942653	1.13657	0.903411	0.718071	0.48823	0.75705	0.499172	0.228358
13	20.2	0.5	1	0.460267	0.471818	0.924259	0.949099	0.586075	0.808662	0.692877	0.957011	0.883904	0.741895	0.458939	0.531121	0.696964	0.849707	0.711794	0.854994	1.01614	0.507768	0.285745	0.852473	0.901628	0.9427	0.769898	0.947781	NaN	NaN	1.04569	0.753845	0.563138	0.9577	0.975028	0.936546	0.759019	0.969166	1.06651	1.40174	0.982763	1.21704	1.13112	0.98692	0.565332	0.876582	0.885179	0.859124	1.05754	1.43701
13	20.525	0.75	1	1.63822	1.70707	1.57884	1.77672	1.52313	1.48658	1.00045	0.983381	0.879665	1.38291	1.47748	1.18407	1.05195	1.02224	0.904624	0.703662	1.39532	1.18219	1.44678	1.49256	1.29559	1.29469	1.35975	1.4724	NaN	NaN	0.583812	1.02799	1.41969	1.27603	1.30765	1.34785	1.11953	0.935315	1.31355	0.943101	1.41245	1.5523	1.24481	1.15691	1.42064	1.50184	0.772098	0.919009	0.683256	1.25198
13	21.125	1	1	1.36778	1.32727	1.17988	1.15374	1.01062	1.54261	1.41608	1.48811	1.10088	1.14912	0.777235	0.966148	0.965919	0.657138	1.38968	0.974287	1.26265	1.23742	1.23559	1.27716	1.24409	1.31199	0.849169	0.86946	NaN	NaN	1.18455	1.08117	1.01808	0.964192	0.992576	1.02936	0.902986	1.0804	1.05454	1.24996	1.27285	1.32848	1.25409	1.31558	0.913378	1.49333	1.19725	1.16086	1.46142	1.6521
13	23.25	0.5	1	1.13195	1.36848	1.19882	1.11353	1.51881	1.60558	0.618212	1.20835	1.219	1.1417	1.40868	0.811228	1.60142	1.53129	1.79355	1.59196	1.17261	1.29417	0.90824	1.53605	1.42885	1.43899	1.45033	1.42948	NaN	NaN	0.968092	0.961714	1.14762	0.958933	1.54288	1.41255	1.40309	1.28556	1.2372	1.26552	1.39671	1.73023	1.48529	1.66326	1.53408	1.52323	0.952262	1.18127	0.767464	0.898189
13	23.7	1	1	0.587817	0.775401	0.866587	1.26783	1.0743	0.829189	0.718396	0.819846	1.2198	1.00082	1.03393	1.20388	0.999819	1.39531	1.14152	1.07345	0.55677	1.00295	0.521196	0.909481	0.806079	1.0892	0.937755	0.957097	NaN	NaN	0.978011	0.797564	1.12176	0.88269	1.42173	1.06614	0.842273	0.915861	1.05957	1.10919	0.942521	0.960361	0.830608	0.898459	0.570183	0.828515	0.834122	0.738976	0.989831	0.500109
14	1.55	3	0	1.55269	1.35219	1.41117	1.68774	1.49564	1.44955	1.03761	1.22071	1.37408	1.60347	1.6868	1.59352	1.71903	1.44711	NaN	1.26898	1.77249	1.48019	1.55549	1.49666	1.18938	1.18865	1.44164	1.39142	NaN	NaN	1.12733	1.05718	1.46939	1.4432	0.992329	1.18011	1.4162	1.20662	1.40136	1.13859	1.55065	1.11254	1.6727	1.24317	1.56078	1.33762	1.49738	0.861426	1.63221	1.21578
14	1.775	2	1	1.16244	1.1529	1.39838	1.44779	0.965706	1.12844	1.5749	1.57731	1.05987	1.50171	1.90393	1.7869	1.63338	1.66624	NaN	1.63673	1.30841	1.49451	1.57902	1.34073	1.40119	1.31997	1.35792	1.286	NaN	NaN	1.15925	1.13357	1.561	1.17685	1.13291	1.19213	1.33548	1.4221	1.03348	1.3924	0.788674	1.05449	1.475	1.17835	1.33625	1.12872	1.34812	0.972791	1.01007	1.26921
14	2.6	1.5	1	1.22105	1.36193	1.03561	1.30688	1.12757	1.02333	1.21351	1.33625	0.68199	0.283694	1.23857	1.00161	1.25298	1.01478	NaN	0.750632	1.29963	1.45033	0.978976	1.07837	1.27923	0.867684	1.02854	1.04911	NaN	NaN	0.502694	0.974911	0.786224	0.961308	1.27814	1.3663	1.22543	1.32839	1.42336	1.38851	0.862535	0.839764	1.52858	1.01977	1.52605	1.06663	1.3125	0.962664	1.75774	1.12578
14	3.2	1	0	1.30144	1.13232	1.71366	1.5891	1.55203	1.11417	0.845338	0.377886	1.04899	0.706588	0.731236	1.29879	0.590345	0.913632	NaN	1.54712	1.3634	1.15408	1.21527	1.37083	1.01449	1.29843	1.35342	1.25819	NaN	NaN	1.3372	1.2581	1.34223	1.15445	1.52367	1.17446	0.99404	0.917197	1.16889	0.916829	0.778098	0.805663	1.27191	1.25318	0.925603	1.13778	1.36843	1.28774	1.32793	1.39648
14	4.875	2	0	0.53937	0.421796	0.786301	0.740675	0.573817	0.952926	0.711152	1.44987	1.30567	1.29573	0.842099	0.514411	1.21974	0.976915	NaN	0.705564	0.873451	0.722304	1.25137	1.00855	0.884106	0.641724	0.752196	0.68109	NaN	NaN	0.386935	0.895078	0.570816	0.798194	1.17561	1.11049	1.04668	0.979656	1.20874	1.062	0.738081	0.737296	0.778098	0.864693	0.767894	0.926122	0.55859	0.833114	0.659903	0.721272
14	5.6	1	0	1.41188	1.37982	1.53955	1.07493	1.15521	1.39579	0.450099	0.661305	0.914192	1.03793	1.0148	0.766479	1.01544	1.24775	NaN	1.16436	0.616014	1.09078	1.2368	1.16253	1.47778	1.46805	0.912761	1.08506	NaN	NaN	0.601346	0.811508	1.11801	1.33519	1.10691	0.950266	0.823676	0.838721	0.778836	0.692144	1.22749	1.44839	0.977701	0.858268	1.30006	1.21126	0.664981	1.06898	0.939112	0.988929
14	6.45	2	1	1.13544	0.940665	0.903096	1.4424	0.868594	0.927553	1.34855	1.03123	0.963867	0.98683	1.75207	1.01221	1.56262	0.587848	NaN	0.533412	1.11736	1.45231	0.970007	0.704013	1.48105	1.39317	1.00358	1.37398	NaN	NaN	0.895466	0.777326	1.29464	0.778249	0.341354	0.7825	0.634549	0.765917	0.695563	0.464887	0.768333	0.874678	0.639586	0.603773	1.17684	0.751013	0.688004	1.22739	0.974153	1.41664
14	10	3	0	1.14108	0.988509	0.983429	0.6088	0.84375	0.888658	0.75679	0.729636	0.724138	0.727668	0.28534	0.59438	0.479657	1.25601	NaN	0.488191	0.604118	1.23474	0.907831	0.883337	0.85972	1.08859	0.685707	0.928814	NaN	NaN	0.847488	1.11056	0.584152	1.02924	0.863537	0.83487	0.76152	0.819771	0.514113	0.664206	0.530722	0.873292	0.92037	1.36291	0.67632	0.910655	0.681218	1.01355	0.727601	0.760085
14	10.2	4	1	0.926969	1.08045	1.0925	1.12	0.822668	0.713968	0.357371	0.744663	0.823274	0.910792	0.571217	0.733479	0.844667	0.966476	NaN	1.29057	1.17983	1.29859	0.820157	0.984862	0.861	1.48636	0.904376	0.825151	NaN	NaN	1.0608	0.843473	1.44586	1.35713	1.16479	0.892341	0.90009	0.831097	1.18238	1.15677	0.72398	1.04621	1.03157	1.3494	0.766136	0.945436	0.775505	0.808706	0.757875	1.06265
14	10.75	3	0	0.676083	0.97741	1.06728	1.37606	1.04316	1.09235	1.05183	0.750575	1.04296	0.872477	0.654637	0.993925	0.615888	1.05165	NaN	0.504523	1.04505	0.903235	0.635878	0.492932	0.71597	0.677097	1.06	1.3233	NaN	NaN	0.761151	0.960321	0.5741	1.13644	0.673716	0.733195	1.07061	0.785522	0.965871	0.692844	0.724016	0.696426	1.04522	0.862768	0.660724	0.738946	0.685163	0.685328	1.34656	1.3388
14	11.425	1	0	1.23365	1.30333	0.804265	1.30911	1.10033	0.888704	0.885491	1.34635	0.911345	1.11061	0.897543	1.1834	0.921508	1.37132	NaN	1.08639	0.851889	1.24422	0.984973	1.22607	1.10514	1.28832	0.993295	1.15859	NaN	NaN	0.908414	1.1426	1.41046	1.35212	1.48919	1.40276	0.950884	1.25124	1.24342	1.2822	1.24012	1.28002	0.829676	0.999643	1.02473	1.4536	1.03859	1.109	1.05229	0.965911
14	12.825	7	0	1.35149	1.01906	0.752485	0.949074	1.09015	1.17672	1.06858	0.570147	1.13899	0.477995	1.04634	1.56645	0.897028	1.09489	NaN	1.02624	1.51266	0.875114	1.25429	1.07014	1.06264	1.04908	1.31655	1.276	NaN	NaN	1.00753	0.794484	1.46954	1.42936	0.689867	0.986443	0.795634	0.853397	1.10586	1.01518	1.2029	1.15185	1.39625	1.03131	1.27522	0.984297	0.831419	0.722975	0.895149	1.18321
14	14.15	2	1	0.923045	0.772351	1.16068	0.862414	0.970519	0.87979	1.04352	0.939984	0.860529	0.727924	0.882997	0.654665	0.995383	1.12272	NaN	0.277637	0.528678	0.763057	1.04125	0.760989	1.36345	0.916764	1.01629	1.07745	NaN	NaN	0.742977	0.770896	1.03931	0.73905	1.45423	1.05436	0.939098	0.9817	0.839534	1.25851	0.859559	0.689479	0.853994	1.10956	1.15142	0.829478	1.18033	1.06373	0.718763	1.4261
14	15.025	1.5	1	0.973067	0.559422	1.02167	0.818949	0.954449	0.599203	1.55739	1.57211	1.05311	1.40763	1.25471	1.43251	1.22528	1.1008	NaN	1.29095	0.932576	0.846871	0.919991	1.02713	0.866646	1.16476	1.22198	0.85164	NaN	NaN	1.38943	1.2165	1.40312	1.0771	1.17901	0.95646	0.82724	1.01303	0.816921	0.820011	1.26922	0.965543	0.992011	0.548782	0.643863	0.848424	0.985595	0.982019	1.26693	0.817802
14	15.75	3	0	1.14031	0.877322	0.564463	0.458122	1.08252	0.88032	1.28689	1.00864	1.39137	1.31244	0.768005	0.787593	0.880529	1.6263	NaN	1.57301	0.988541	1.25975	0.930631	1.00129	1.0733	1.26577	1.03359	1.15805	NaN	NaN	1.53549	1.36675	1.08235	0.801538	1.3032	0.820719	0.86711	0.992278	0.858549	1.21868	0.740649	0.861667	0.71099	0.829805	0.744953	0.788831	0.960059	0.921012	1.42653	1.09484
14	16.55	3	1	0.652363	0.821173	0.912734	0.798523	0.787287	0.591578	0.938391	1.14201	0.743466	1.02235	1.29434	1.39359	0.966294	1.60271	NaN	1.30234	1.19529	0.765658	1.05535	1.3585	0.959806	1.05539	1.1544	1.3507	NaN	NaN	0.85314	1.01966	1.41524	1.47703	0.98711	1.12549	0.924846	0.788364	0.786753	1.1933	0.542465	0.690408	0.879406	1.24683	0.608273	1.25118	0.635809	0.728344	1.03188	0.836441
14	17.175	1	0	1.0568	0.818871	0.45809	1.11421	1.54734	1.06545	1.41496	1.34357	1.22254	0.924466	1.22595	1.10976	0.683326	1.35467	NaN	0.759143	0.62251	0.685291	1.06314	1.1439	0.813084	0.802247	0.691983	0.947199	NaN	NaN	1.2705	0.939665	1.14471	0.675854	0.780011	0.991347	1.17897	1.00792	1.20314	0.996419	1.25208	0.658087	0.70147	0.922909	1.31439	0.786285	0.89224	0.959189	0.47817	1.04154
14	19.5	6	1	0.630767	0.588071	1.16022	1.02125	0.951046	0.879692	0.704426	0.342279	0.882189	0.754005	1.10463	0.954015	0.738567	1.14547	NaN	0.630435	0.718562	0.787748	1.02015	0.952782	0.761029	0.89977	0.682056	0.772769	NaN	NaN	1.08858	1.23594	0.94619	0.969878	0.815934	1.15087	1.02403	0.89525	1.01087	1.14622	0.858613	1.03016	0.87464	1.08411	0.573208	0.981246	0.791849	0.753614	0.957253	1.40732
14	19.65	3	0	0.936171	1.04729	1.24703	1.10785	0.756509	0.934919	1.02903	1.09737	1.39068	1.31593	0.796273	0.9158	0.439067	1.00196	NaN	0.426805	0.62156	0.503643	0.998335	1.23773	0.542205	0.642238	0.84687	0.89257	NaN	NaN	0.677773	1.32317	0.618077	0.810695	1.22561	0.991824	0.950575	1.05895	1.04048	1.15993	1.02693	1.20275	0.851113	1.01191	0.986564	0.96579	0.779343	0.753582	0.800393	0.778838
14	20.2	2	1	1.57244	1.61808	1.31171	1.07486	1.66169	1.29216	1.03745	1.28632	1.06829	1.02265	1.0028	0.998534	1.25907	1.02197	NaN	0.950429	0.726445	0.82862	1.38612	1.14839	1.19509	1.18066	1.34079	1.13034	NaN	NaN	1.3801	1.53919	1.44095	1.20386	1.51786	1.32016	1.24909	1.07977	0.895899	1.15182	0.978181	0.927881	1.05256	1.44108	0.758497	1.00914	1.10766	1.16503	1.20836	1.12705
14	20.525	2	1	1.00044	1.2268	0.959802	1.19468	0.895178	1.03684	0.756061	0.757376	1.24156	1.19876	0.77849	0.984265	1.22515	1.14551	NaN	0.522922	1.13526	0.739009	0.592748	1.10658	0.715817	1.11481	0.6502	1.07214	NaN	NaN	1.16787	1.09352	0.916728	1.22029	0.533641	0.940476	0.901292	0.715805	0.71123	0.569733	1.12781	1.53641	0.568613	1.11934	0.334271	1.30799	0.526522	0.718995	0.583435	0.528418
14	21.125	1	1	0.987351	1.11141	0.794178	0.623212	1.14268	0.706703	0.718468	0.463526	0.587333	1.25054	0.521159	0.593835	0.575058	0.755658	NaN	0.241891	1.01467	0.85689	0.772566	0.676452	1.05312	0.541662	0.647183	0.713001	NaN	NaN	0.810711	0.774471	0.665438	0.778851	0.600212	0.555165	0.633001	0.689325	1.13386	0.958093	1.30326	0.951818	0.949356	0.757132	0.766715	1.17424	0.92894	0.982556	0.701929	1.20437
14	23.25	2	1	1.68978	1.60531	1.75479	1.44409	1.67438	1.50917	1.71421	1.5078	0.942062	1.14771	1.63442	1.5839	1.31492	1.2662	NaN	1.65622	1.00039	1.1708	1.34436	1.17619	1.12179	1.119	1.36944	1.26457	NaN	NaN	1.2637	1.26558	1.36884	1.47471	1.36511	1.32068	1.21631	1.363	1.23094	1.32558	1.03571	1.34907	1.39624	0.964626	1.20181	1.20829	1.55993	1.03449	1.40155	0.371459
14	23.7	0.5	1	0.756871	0.633434	1.11154	1.23284	0.957932	1.09861	1.39276	0.98461	0.890653	1.01983	1.05434	0.566072	1.17304	1.05871	NaN	1.09302	0.983064	0.685764	1.36662	1.15298	1.02006	1.07431	1.22589	1.04857	NaN	NaN	0.779501	0.833875	1.011	0.93225	1.09493	0.897038	1.08433	0.893642	1.22533	1.08873	1.0346	0.570136	1.27576	1.07424	1.08238	0.861088	1.23027	1.00293	1.30744	1.03923
15	1.55	12	1	0.852097	0.60535	1.19375	0.909615	1.09844	1.30504	1.01769	0.926345	1.74772	1.00141	0.567546	0.488214	0.662588	0.837054	0.923921	0.982128	0.736226	0.775082	1.04162	1.22762	1.27313	0.869092	1.10709	0.950489	NaN	0.526198	1.03792	1.07101	0.869215	0.622324	0.990661	1.0821	1.00557	1.30743	1.35571	1.56319	0.543172	0.53932	1.38933	1.03356	1.06063	0.552573	0.658723	0.857026	1.22874	0.337209
15	1.775	5	1	0.513726	0.6658	0.792016	0.882927	1.63853	1.55231	1.28411	1.20321	1.71211	1.18691	1.44422	1.76874	1.0951	1.11059	1.36859	0.601269	1.02686	1.05525	0.628528	0.486769	0.876106	0.943857	0.927466	0.856403	NaN	1.6401	1.39416	0.974793	1.48699	1.68396	1.31105	1.25331	0.949383	0.965469	1.00882	0.991912	0.950264	1.08724	0.354436	0.730799	1.00051	0.74067	0.813177	0.727484	1.36257	0.600665
15	2.6	5	0	0.793267	0.890449	0.587757	0.957486	1.6636	1.42624	1.48788	1.53559	1.46337	1.33045	1.42959	1.00364	1.01363	1.2557	1.37456	1.23296	1.29709	1.4642	1.32685	1.27177	0.976976	1.30326	1.00231	1.03053	NaN	0.345143	1.53546	1.2399	1.53407	1.1156	1.33561	1.23247	1.19054	0.733146	0.894408	1.09143	1.527	1.4641	0.975674	0.837917	0.957345	1.01883	0.920658	0.959612	0.447919	0.579858
15	3.2	2	1	0.795052	0.529148	0.662608	0.473177	0.704857	0.464713	0.549738	0.608988	1.23473	1.03681	0.571715	1.07859	0.522279	0.584445	0.538534	0.592049	0.770043	0.448568	0.307339	0.495482	0.427887	0.468797	0.519191	0.376317	NaN	0.54101	0.758192	0.72818	0.700341	0.68654	0.997282	0.456308	0.892969	0.682241	1.25373	0.463582	0.391641	0.466205	0.658493	0.369845	0.443882	0.422257	0.443454	0.490646	0.54184	0.695373
15	4.875	2	0	0.889055	0.750822	0.843397	1.10436	1.21457	1.01149	1.41302	1.00379	0.922491	0.669177	0.898789	0.520129	1.02221	1.26502	1.53218	1.06591	1.27943	1.14237	0.797292	0.432694	1.64558	0.81752	1.09262	1.14948	NaN	1.73784	1.11963	1.06677	0.558818	0.368265	1.0556	0.620394	1.17708	1.20203	0.708674	1.01404	1.20889	1.01137	1.22584	1.45895	0.992018	1.0639	1.18892	0.825746	1.08153	0.774737
15	5.6	7	1	0.661952	0.689385	1.25783	1.14662	0.554711	0.623006	0.616693	1.09327	1.21609	0.806984	1.29267	0.557786	0.986238	1.44602	0.815915	0.962777	0.519557	1.16083	0.411876	0.855688	1.0675	0.810977	0.723795	0.629714	NaN	0.29992	0.722818	1.5089	1.18452	0.816622	0.729886	0.617599	1.14142	1.07976	0.993156	1.10217	0.966661	0.760976	1.20188	1.07362	0.966568	0.878272	0.997954	0.787057	0.660306	0.417792
15	6.45	3	0	0.940458	1.28053	0.668735	0.805525	0.44594	0.946916	0.728755	0.995002	0.770276	0.967696	0.924324	0.990985	0.884598	0.795935	1.70539	1.70325	1.02215	1.36362	1.09297	1.42756	0.691573	1.00267	0.974803	1.17671	NaN	1.02934	0.981411	0.789065	0.497008	1.15351	0.502222	0.736398	1.09402	0.803087	0.720588	0.830517	0.881225	1.31917	0.82101	1.17488	0.88517	1.09462	0.908338	1.43204	1.04504	1.30846
15	10	3	0	0.626395	0.946654	0.606504	1.21041	0.578768	0.881685	0.994916	0.768602	0.889356	0.745177	1.37064	1.59025	0.666492	0.695478	0.232319	0.231761	0.290646	0.441074	0.384917	0.311388	0.575576	0.589097	0.40358	0.517021	NaN	1.29112	0.435694	0.332978	1.00395	1.17216	0.282075	0.514921	0.678126	0.582417	0.656591	0.549906	0.473486	0.704574	0.464972	0.645635	0.89299	0.389529	0.412015	0.597923	0.49627	0.728674
15	10.2	10	0	1.09133	0.734869	0.811941	0.935066	0.652268	0.443472	0.67734	0.366364	0.596133	0.855039	1.14381	1.38917	0.618164	0.446429	0.0613328	0.284373	0.138266	0.570868	0.190058	0.287918	0.302042	0.285024	0.534029	0.445592	NaN	0.671429	0.446045	0.501518	1.2805	1.55891	0.818972	0.677518	0.583608	0.59438	0.687527	0.803086	0.531391	0.593248	0.63806	0.557733	0.278602	0.523704	0.354362	0.450278	0.45282	0.257526
15	10.75	4	1	0.655115	0.855663	0.987498	0.985383	0.632831	0.801329	1.30743	0.920215	1.15139	0.774256	0.812914	1.25795	0.921897	0.90295	0.314451	0.591113	0.917835	0.582338	0.750936	0.347437	0.708125	0.435247	0.821723	0.586818	NaN	1.34884	1.26103	0.884579	0.856412	0.922584	0.880746	1.11249	0.896657	0.874513	1.19306	0.979157	1.2197	0.761079	1.28806	1.06214	0.690103	0.567829	0.739719	0.520683	1.32052	0.423264
15	11.425	3	1	0.710913	1.07467	0.674934	0.904855	1.00229	1.24964	1.22754	1.04699	0.806901	0.655761	1.2737	1.7258	0.894554	1.04073	0.307917	0.559331	0.643862	1.00458	0.589411	0.494579	0.75657	0.746614	0.631766	0.528674	NaN	1.5645	0.723375	0.662257	1.51123	1.5477	0.759319	0.767158	0.730842	0.352799	0.72835	0.353531	0.787727	0.429272	0.47336	0.337981	0.607997	0.59364	0.784551	0.602577	1.47786	0.885401
15	12.825	5	1	0.826873	1.14376	1.09015	0.935759	1.27901	1.34368	1.34959	1.48764	1.56325	1.68822	1.35734	1.43947	1.41947	1.32633	1.70922	1.72305	1.51215	1.35433	1.40777	1.37992	1.29217	1.21434	1.47848	1.45732	NaN	1.24012	1.47767	1.32726	1.52012	1.28282	1.5524	1.01495	1.34826	1.29953	1.02248	1.12578	1.0162	1.20184	0.904841	1.13241	1.40248	1.04201	1.33666	1.57778	1.62191	1.24793
15	14.15	4	0	1.06009	1.09	1.35354	1.41994	1.53868	1.26732	1.10334	1.31603	0.912542	1.40366	1.11862	1.35081	1.25047	0.832611	1.50814	1.2324	1.40389	0.840781	1.29449	1.60354	0.729595	0.816171	1.36508	1.33231	NaN	1.11347	1.57717	1.35902	1.47302	1.31977	1.37845	1.22443	1.28048	1.49142	1.19561	1.42446	0.701744	0.889283	1.10048	1.20014	1.11557	0.962813	1.00719	0.94616	1.05252	1.8152
15	15.025	32	0	1.0066	0.692964	0.914862	0.494828	1.11171	0.642435	0.806455	1.1717	1.1142	0.441276	1.00734	1.07204	0.526038	0.54636	0.37857	0.666202	0.602372	0.831642	0.448557	1.06364	0.728723	1.00977	0.711802	0.736385	NaN	0.854561	0.914922	0.848003	1.25574	0.868658	1.24481	0.776507	0.635766	1.01132	0.464047	0.942454	0.821433	0.902938	0.845744	1.03232	0.708396	0.747625	0.528179	0.892449	0.339754	0.303148
15	15.75	1	1	0.923626	1.37991	0.683956	0.888235	0.620036	0.802048	1.20802	0.877114	0.350675	1.018	1.06111	1.00494	0.896439	1.08311	0.740112	0.834186	0.872475	0.699816	0.521697	1.01924	0.844959	0.874329	0.704465	0.956761	NaN	0.515522	0.718925	0.453372	1.07168	1.11895	0.772685	1.0004	0.861969	0.795444	0.616162	0.825519	0.674796	0.494196	0.640691	0.801351	0.934578	0.96392	0.796328	0.867485	0.5058	0.589854
15	16.55	1	1	0.995439	1.15899	1.27666	1.34784	0.845849	0.757151	0.718193	0.622644	1.0303	0.66431	0.320367	0.58383	0.634058	0.409126	0.611846	0.539589	0.67306	0.534781	1.1035	1.0967	0.373091	0.361081	0.553182	0.719422	NaN	0.372828	0.36859	0.359162	0.648745	0.591002	1.38543	1.05274	1.35249	0.99668	1.35269	0.870204	1.22441	1.20281	1.18106	0.906838	1.11065	1.27599	0.803724	0.641892	1.53389	0.707206
15	17.175	2	1	1.3994	1.24423	1.56091	1.55664	1.81888	1.63982	1.6146	1.40391	1.26886	1.21459	1.46817	1.11459	1.34163	1.20665	0.93576	0.83127	1.36666	1.09245	1.8413	1.65623	1.62517	1.15615	1.55	1.52829	NaN	1.34053	1.33475	1.58613	0.919959	0.810786	1.70131	1.56919	1.71434	1.45643	1.71696	1.36379	1.76065	1.56197	1.80934	1.40908	1.74493	1.54032	1.55671	1.31899	1.71503	0.929883
15	19.5	2	1	0.86418	0.783653	0.555475	0.571909	0.478159	0.391432	0.35598	0.377548	0.20003	0.653937	0.400607	0.486345	0.52032	0.357845	0.711612	0.650684	0.431474	0.818498	0.681203	0.758778	0.633467	0.683607	0.538179	0.668342	NaN	0.128017	0.676801	0.65599	0.637525	0.611639	0.520516	0.409004	0.618252	0.949832	0.843669	0.912251	0.573202	0.581803	0.613595	0.915117	0.829718	0.744543	0.528483	0.722009	0.283086	0.564873
15	19.65	2	1	1.24054	0.721388	0.907933	0.458594	0.897156	0.681955	0.321631	0.568244	0.232476	0.777009	0.23642	0.389463	0.307145	0.171198	0.42829	0.414544	0.718548	0.373346	0.589042	0.583948	0.709514	0.329633	0.719592	0.320272	NaN	0.165057	0.547656	0.518839	0.34441	0.206227	0.710653	0.650922	0.697042	0.697688	0.688217	0.936596	0.956086	0.941315	0.99775	0.599841	1.35435	0.684244	0.507309	0.830977	1.33174	0.881016
15	20.2	2	1	0.66979	0.752477	0.615527	0.917418	0.451478	0.600368	0.403834	0.786138	0.974843	0.50546	0.766229	1.33583	0.697328	0.441899	0.219859	0.511214	0.858726	0.957999	0.87194	0.724543	0.489177	0.552249	0.723413	0.731626	NaN	0.483247	0.78326	0.621926	1.20622	1.0641	0.907094	1.09605	1.04641	1.08039	0.913829	0.998987	0.669232	0.733258	0.916458	0.831751	0.476263	0.961061	0.517909	1.09722	0.606417	0.377947
15	20.525	4	0	0.823657	0.919017	0.964256	1.17986	0.804537	1.1472	0.571575	0.479525	0.603486	0.506065	1.01627	1.32557	0.582999	0.417897	0.361372	0.749946	0.779356	0.928228	0.755949	1.09319	0.658991	0.722729	0.75188	0.889604	NaN	0.492214	0.673587	0.68745	1.41943	1.32977	0.847393	1.19126	0.629811	0.795293	1.16134	1.24655	1.124	1.09081	0.930537	0.981267	1.01515	1.19464	0.345065	1.11488	0.314821	0.588256
15	21.125	2	1	0.913858	0.842617	0.902539	1.06276	0.896644	0.875455	0.442769	0.526794	0.706184	0.663452	0.286768	0.399778	0.460677	0.472425	0.167595	0.769637	0.816061	1.17657	0.919344	0.77551	1.0033	0.800298	0.872694	0.712059	NaN	0.105645	0.518596	0.76128	0.941245	0.776925	0.865436	0.67882	1.02166	0.887895	0.989749	1.01848	1.36858	1.22138	1.3618	0.790744	1.12299	1.1621	0.431473	0.635567	1.06176	1.2396
15	23.25	1	1	0.60203	0.763717	0.601603	0.697107	1.04594	0.729353	1.67408	1.71467	1.67986	1.62166	1.72042	1.72957	1.52107	1.72894	1.90828	1.6205	1.47332	1.09387	0.961087	1.06879	1.13734	1.22534	1.1596	1.20663	NaN	1.48993	1.04282	1.23088	1.5311	1.54841	0.57546	0.620216	0.488935	0.772679	0.549617	0.494079	0.562501	0.829875	0.979011	0.621157	0.678408	0.842408	1.40525	1.08243	0.898161	0.713933
15	23.7	2	0	0.789723	0.97143	0.51788	0.773759	0.616289	0.522438	1.51857	1.39512	1.14596	1.37039	1.25772	1.68634	1.00954	1.36824	1.16755	1.29318	0.854198	0.942448	0.447972	0.482567	0.737715	0.74411	0.687311	1.0354	NaN	1.36342	0.957583	0.840806	1.24872	1.48028	1.23531	0.854836	1.38178	1.45161	1.60283	1.11027	0.959803	0.740293	1.39331	1.03065	0.254766	0.760939	0.996638	1.20364	0.250371	0.277479
16	1.55	10	0	0.784929	1.14136	0.705845	1.10005	1.30585	1.18066	1.71493	1.50626	1.28949	1.74851	0.867603	1.09721	0.964201	0.712822	0.736391	1.30251	1.07796	1.19881	1.23606	1.45364	1.34872	1.15632	1.13566	1.25269	NaN	0.541513	1.19251	1.34939	1.05754	0.972547	1.06818	0.812356	1.01523	1.14782	0.54073	1.04913	0.981527	0.688372	0.76793	1.02977	1.15296	1.17785	1.39985	1.42162	1.40079	1.43187
16	1.775	6	1	0.812153	0.72182	0.835017	0.868576	1.02195	1.37737	1.33059	0.872472	1.15474	1.02338	1.3164	1.47833	1.39688	1.04881	1.12485	1.38553	1.48375	0.922021	1.23855	1.1548	1.35988	1.11027	1.22303	1.24268	NaN	1.08545	1.13292	1.57539	1.52465	1.38568	0.840044	1.00239	1.35782	0.865441	1.49869	1.01912	0.732144	0.970332	1.20973	1.01532	1.2662	0.907019	1.34311	1.04302	1.02551	0.867052
16	2.6	6	0	1.62027	1.55393	1.27256	0.900172	1.62959	1.26053	1.01801	1.68862	1.20731	1.66208	1.597	1.64612	1.19488	1.36112	1.37623	1.43782	1.56103	1.25932	1.55837	1.35006	1.50918	1.19131	1.23908	1.35448	NaN	1.70717	1.20823	1.34787	1.50045	1.42242	1.48754	1.33839	1.10733	1.12028	1.35585	0.934058	1.28798	1.35529	1.48861	1.18238	1.60996	1.27255	1.18804	1.0129	1.42097	1.37774
16	3.2	7	0	0.646929	0.678879	0.839025	0.764162	1.04991	0.925351	1.71524	1.53584	1.09342	1.54265	1.25397	1.36599	1.12569	1.31374	1.36418	1.54311	1.34854	1.52982	0.817676	1.17805	0.996792	1.51004	1.17971	1.04787	NaN	1.1633	1.244	1.45033	1.02536	1.6804	0.851797	0.916914	0.740868	1.31457	1.20614	1.61575	0.989929	1.16154	0.788633	1.12211	1.15088	1.33171	1.13157	1.4562	1.41685	1.17636
16	4.875	8	0	1.64452	1.54711	1.54511	1.42354	1.34035	1.67	0.835362	1.36446	1.05097	1.49203	0.949466	1.16164	1.00512	0.935144	1.21132	1.46028	1.43282	1.31088	1.68331	1.58014	1.65087	1.72308	1.76176	1.8099	NaN	1.5807	1.15053	1.53685	0.776437	0.765197	1.31007	1.18183	1.52939	1.34241	1.58975	1.18687	1.32827	1.41915	1.66151	1.37565	1.50316	1.29473	1.45182	1.63974	1.42101	1.01698
16	5.6	5	0	0.751074	0.829489	0.787057	1.17687	0.950358	0.817272	0.691356	0.611254	1.11109	0.550419	0.377936	0.677473	0.636051	0.708177	0.465052	0.596328	0.544932	0.467967	0.707917	0.671713	0.535124	0.427313	0.749581	0.6987	NaN	1.56256	1.20275	0.56884	1.27267	1.13364	0.931606	0.565721	0.845891	0.182362	0.812373	0.138236	0.693574	0.421427	0.945797	0.474813	0.870836	0.671675	0.385708	0.374745	0.77988	0.223862
16	6.45	8	0	1.18401	1.33999	0.881343	1.14009	0.816714	0.699695	0.615539	0.281767	0.793715	0.491968	0.396545	0.735941	0.619668	0.486306	0.604186	0.515649	1.0093	0.694312	0.641514	1.03825	0.894238	0.928658	0.641234	0.631114	NaN	0.718187	0.408835	0.470681	0.784425	1.00478	0.776196	0.818127	1.02249	0.732887	1.3301	0.986888	0.569562	0.726829	1.00507	0.954364	0.480143	1.23462	0.658167	0.518197	0.472891	0.677051
16	10	6	0	1.43266	1.11233	1.71766	1.39242	1.21832	1.26544	0.895312	1.15043	1.51277	1.62087	1.05946	1.03481	1.09889	1.39705	0.685933	1.478	0.713462	1.4064	1.14185	1.3306	1.0311	1.41544	1.25394	1.30352	NaN	1.47002	1.2131	1.66638	0.643743	1.06337	1.09114	1.17787	1.42073	1.64768	1.23203	1.36403	1.40912	1.4307	1.10292	1.37797	1.24309	1.40754	1.33226	1.46974	1.21663	1.73912
16	10.2	8	0	0.587672	0.985192	1.05964	1.2666	0.718463	0.817488	1.13569	0.798466	1.14393	1.24153	1.20468	1.35685	1.19937	1.3586	1.23058	1.34134	1.06382	1.17159	0.976143	1.34242	0.770788	0.895416	0.675546	0.714976	NaN	0.56755	0.585877	0.884384	1.07471	0.99991	0.850282	1.18133	1.1099	1.20381	1.20617	1.38537	1.00582	0.998017	0.674723	1.20239	0.818036	1.30628	1.01116	1.37778	0.640867	1.70529
16	10.75	8	0	1.04783	0.830892	0.647733	0.711538	0.919502	1.14129	0.959195	1.13334	0.798595	0.751725	1.29041	1.6628	1.58901	1.35507	1.47809	1.63975	0.929265	1.24145	1.37036	0.8643	1.48968	1.18119	1.34413	1.17897	NaN	1.76307	0.907121	1.14969	1.65324	1.30356	0.949166	0.944252	1.02152	0.89932	0.881388	0.559587	0.657134	0.669719	0.589516	0.465682	0.871338	0.725318	1.03577	0.894367	0.919694	0.914277
16	11.425	5	0	0.595659	0.555701	0.771663	0.555193	0.272927	0.475927	1.12145	1.11388	0.867015	1.05774	0.537282	0.753448	1.17961	0.837954	1.08569	0.915508	0.970135	0.928656	0.889756	0.60257	1.1269	1.01958	0.597444	0.584832	NaN	1.49224	0.501366	0.563201	0.593878	0.869461	0.503714	0.930741	0.879057	0.522092	0.63114	0.423297	1.21234	0.739631	0.669414	0.6398	0.752921	0.558261	0.616938	0.626909	0.871002	0.303914
16	12.825	7	0	0.91092	1.24416	1.03327	1.44913	1.6659	1.53409	1.04124	1.36241	1.13396	1.18958	1.18555	1.4566	1.13051	1.56341	0.543114	1.65906	0.7238	0.716734	1.10662	1.34628	1.0807	1.11824	1.23055	1.52834	NaN	1.77735	0.92642	1.29583	1.53951	1.50012	1.12806	1.40184	1.20031	1.00083	1.28315	1.00226	1.26926	0.885939	1.42068	1.19785	1.32529	0.96319	1.021	1.48721	0.879104	0.377137
16	14.15	7.66667	1	0.956057	0.805952	1.0414	1.03722	1.14042	0.934809	1.57004	1.43226	1.28564	1.1025	1.35769	1.55362	1.53471	1.60344	1.45968	1.64329	1.21139	1.24358	1.13873	1.23359	0.99958	1.12438	1.06127	1.2742	NaN	1.62535	0.972733	0.750785	1.76843	1.507	0.466498	0.945752	1.07201	1.39212	1.10285	1.21289	1.37363	1.63316	1.17334	1.48526	0.779797	1.23357	0.891235	1.28727	0.864547	1.53017
16	15.025	4	1	1.25187	1.30619	1.44826	1.15967	0.915611	0.826696	1.0354	0.911053	1.19703	1.36148	0.760975	1.21239	0.921561	0.537882	0.916879	0.640301	0.833826	1.36198	1.50575	1.41695	1.2603	1.27151	0.749754	0.933254	NaN	1.03996	1.1646	1.00435	0.73175	0.916585	1.38066	1.4586	1.05095	1.05725	1.02922	1.1004	0.87643	0.70844	1.26141	0.909538	1.05463	1.23763	1.51842	0.97648	1.08865	0.936774
16	15.75	4	1	0.873971	1.16362	1.42138	1.03973	1.43601	1.70682	0.935364	1.32572	1.10835	1.57522	0.643894	0.478211	0.893511	1.23975	0.77426	0.971626	1.10132	1.0182	0.809007	0.843936	0.907241	0.748875	1.0886	1.11801	NaN	0.125632	1.72399	1.63118	1.33334	1.30625	1.61701	1.26687	1.52823	1.59884	1.71462	1.65556	0.989408	1.21425	1.15993	1.6459	0.718345	1.08967	1.13706	1.27273	1.43772	1.45003
16	16.55	7	0	0.426826	0.502499	0.564342	0.727902	0.544685	0.472926	1.30726	1.07642	0.796943	0.531312	0.571618	0.381641	0.571455	0.777667	0.973985	0.988532	0.51871	0.702059	1.16099	1.41665	0.746037	0.640442	0.607091	0.93108	NaN	0.201979	0.520506	0.64783	0.248248	0.238435	0.648008	1.00861	0.871098	0.829206	0.900842	0.952868	0.960204	1.06643	0.517751	0.783974	1.30205	1.25372	1.42857	0.894933	1.06687	0.693237
16	17.175	3	0	1.30679	1.46518	0.615158	1.19204	1.24061	1.30684	0.843086	0.526178	1.05587	1.17697	1.18726	0.910219	0.900908	0.940594	1.2625	0.438054	0.87038	0.967747	0.947618	1.32491	1.02184	1.02369	1.42524	1.16083	NaN	0.244929	1.21137	1.22616	1.75035	1.23783	0.780933	0.93196	1.06582	0.961743	1.01308	0.963636	0.867118	0.840896	1.36775	1.41048	0.642387	0.861658	1.21768	0.935393	1.23992	1.01549
16	19.5	10	0	1.54716	1.55478	1.35907	1.32852	1.52441	1.24607	1.41329	1.43795	1.09155	1.33145	1.26256	1.50759	1.17791	1.37859	1.22487	1.10651	1.34992	0.950445	1.38351	1.60106	1.5131	1.46022	1.576	1.65899	NaN	0.773036	1.23205	1.51552	1.511	1.44938	1.15187	1.14459	1.13661	1.0237	1.22859	1.37978	0.799577	1.09888	1.46572	1.30112	1.55834	1.21299	1.05953	0.856284	1.12406	1.22171
16	19.65	4	0	1.15373	1.00571	0.701229	1.03576	1.09312	0.643543	1.47773	1.58428	0.941288	0.804877	1.26787	1.1961	1.15938	1.15413	1.24471	0.729193	1.30446	0.769485	1.18289	1.05353	0.950523	1.22904	0.929711	1.09474	NaN	0.371468	0.841836	0.866323	1.37108	1.27489	1.3253	0.677498	0.931851	1.01284	0.526402	0.50023	0.751418	0.489686	1.07486	0.469082	0.935111	0.654371	1.27778	0.379684	0.899783	0.546609
16	20.2	5	1	0.571948	0.979423	0.758505	0.479905	0.813607	0.507954	0.57615	0.443817	1.08923	0.847438	0.349614	0.430154	0.739007	0.635801	0.780481	0.785302	1.0857	1.16211	1.01435	1.09956	0.739594	0.827874	1.0376	1.0215	NaN	0.207049	0.378468	0.716004	0.176116	0.284499	0.493932	0.170159	0.595113	0.791945	0.832874	0.444312	0.89099	0.832246	0.866556	0.683713	0.506776	0.980469	1.04175	1.22217	0.802308	0.938206
16	20.525	3.5	1	0.606341	0.792854	0.688416	0.952692	0.889219	1.06121	1.55939	1.16745	0.870368	0.893221	0.363165	0.354598	0.97213	0.832164	0.686089	0.619089	0.753875	0.960533	0.875212	0.896571	0.485589	0.637323	0.697001	0.649073	NaN	1.0421	1.03341	0.99563	0.551181	0.482587	0.906296	0.806358	1.0308	1.22114	0.876012	0.728404	0.724637	0.626049	0.839956	1.16654	0.911046	0.970725	1.01835	0.868643	1.37987	0.982037
16	21.125	2	1	0.912136	1.1178	0.607756	0.78842	0.902672	1.40317	0.568659	1.15893	0.762181	1.34934	0.789261	0.822618	0.632596	1.05842	0.518078	0.887133	0.671668	1.40482	0.559822	0.91792	1.05771	1.20916	1.19742	0.946389	NaN	0.19063	1.06534	1.33756	0.727639	1.24231	1.16609	1.19687	1.34555	1.57406	1.46796	1.47342	1.14155	1.17148	1.26957	1.48863	0.852412	1.17172	0.812872	1.11705	0.541428	1.55907
16	23.25	3.83333	1	0.816139	0.562381	0.7483	0.884323	0.916401	0.746041	0.561317	0.533169	0.783406	0.781368	0.712297	0.97485	0.742043	0.78372	1.13431	1.17236	1.02067	0.916533	0.837338	0.971987	1.36695	0.982507	1.34084	0.738087	NaN	0.264558	1.0171	1.42118	0.642103	0.783731	1.22607	1.28607	1.10758	1.37787	0.799816	1.12708	1.32241	1.15568	1.0223	0.627584	0.67218	0.552687	0.848628	1.04091	1.02036	1.18108
16	23.7	1.5	1	0.594749	0.790615	1.24486	1.56453	0.872303	0.83698	1.64406	1.82035	1.10673	0.471525	1.07306	0.797112	0.702012	0.912896	0.312992	0.837171	0.406942	0.70242	0.611714	0.632991	0.569947	0.661176	0.522998	0.602029	NaN	1.60212	0.21427	0.459836	0.820108	0.793551	0.826545	0.998602	0.615873	0.514375	0.491844	0.523648	0.842978	1.39708	0.984494	1.16895	0.657186	1.10037	0.751659	0.664911	1.12595	0.572795
17	1.55	4	0	0.913449	0.749237	1.05342	0.563691	0.688507	0.723575	0.878664	0.683889	0.89486	0.968825	0.753057	0.639388	0.542037	0.88547	0.536531	1.1884	1.18748	1.39764	0.626683	0.77131	0.6206	0.704661	1.12347	0.87489	NaN	1.08796	0.961636	0.997269	0.710237	0.638091	1.14398	0.66084	1.06131	1.12387	0.819359	0.815397	1.08617	1.2303	0.921467	1.26562	0.798941	1.03505	0.514305	0.767523	0.584511	0.499103
17	1.775	3	0	1.35816	1.63283	1.463	1.59562	1.19118	1.03524	1.08243	1.10047	0.640583	1.35874	0.773001	1.178	0.497931	1.04519	0.64551	1.00511	0.644316	1.10676	0.692706	1.21609	0.910128	1.35819	1.12244	1.28707	NaN	1.65291	1.01647	1.38103	0.548755	0.950851	1.50112	1.72619	1.15025	1.25673	1.2724	1.33892	1.46901	1.51423	0.719297	1.36689	1.01848	1.65951	0.70779	0.854935	0.558577	0.460562
17	2.6	1	1	1.51971	1.36604	1.46153	1.45915	0.725295	0.673657	0.737474	1.19036	1.17999	0.626297	0.688492	1.03919	1.46775	1.59938	0.534556	1.37342	1.22016	1.35742	0.884509	0.765551	1.21955	1.22365	1.03621	0.827065	NaN	1.27417	0.381625	0.760261	0.890829	0.924859	1.27917	1.17546	1.18215	1.22117	0.926118	1.228	1.51737	1.42406	1.06854	0.77331	1.45498	1.14429	0.853081	1.11464	0.885735	0.996458
17	3.2	3.66667	0	0.926312	0.529586	0.95524	0.694794	1.26359	1.32277	1.26921	1.34277	1.01615	1.21103	0.918126	0.596411	0.625	0.72988	1.15739	0.673145	1.45983	1.15011	1.10307	1.41279	1.19781	0.88469	1.36812	1.36668	NaN	0.936106	1.10095	1.13546	1.04175	1.06765	1.02958	1.00659	0.81355	0.853704	0.804456	0.672044	0.469991	0.647124	1.2582	1.15833	1.04495	1.19187	1.08139	0.968399	1.09166	1.33137
17	4.875	4	0	1.03002	0.823274	0.856159	1.20404	1.1837	1.36012	1.02491	1.38214	1.30933	1.30295	0.495857	0.545796	0.947188	1.19363	0.895109	0.453369	0.645362	0.656591	0.849447	0.767491	0.837905	0.62166	0.792067	0.778609	NaN	1.06477	0.665273	0.673362	0.439823	0.739358	1.44025	1.06598	1.33649	1.18245	1.39672	1.19784	1.42837	1.28638	1.04984	0.861467	0.945684	1.07182	0.938227	0.941141	0.755351	0.934624
17	5.6	3	0	1.03688	1.03498	0.809161	0.656314	0.676513	0.682248	1.09979	1.25338	1.38946	1.26057	1.22335	0.579297	1.46465	1.30286	1.30684	1.60444	1.59671	1.24718	1.40858	1.18801	1.29629	0.972903	1.0542	0.965196	NaN	0.701329	0.869356	0.83794	1.81496	1.19306	0.748776	0.384801	1.17047	1.04617	1.12468	0.765441	0.966873	0.660854	1.3766	1.15839	1.44999	1.10969	1.24821	1.18253	1.05231	1.05306
17	6.45	1	0	0.889116	0.687512	0.690139	0.812814	1.42961	1.37368	1.49912	1.48257	1.15764	0.877158	1.50139	1.6214	1.08306	1.02114	0.849618	0.776461	1.19854	1.25139	1.4785	0.879927	1.33936	1.17606	1.24992	1.03949	NaN	0.690057	1.50723	0.985611	1.62326	1.15309	0.907302	1.07246	1.10577	0.917087	1.22248	0.860254	0.907339	0.92884	0.913625	1.44099	1.20439	1.052	1.11905	1.21404	1.1292	1.30508
17	10	5	1	0.893162	0.95939	0.659121	0.855185	1.39285	1.22428	0.58973	0.765717	0.727952	0.528661	0.40099	0.740707	0.771057	0.886683	0.51027	1.02558	0.520472	0.666707	1.06902	0.832349	0.90591	0.797474	0.779681	0.727806	NaN	0.313612	1.15001	0.810712	1.21139	0.615444	0.902431	0.736581	0.819837	0.981544	0.835549	1.10542	1.25488	1.30518	0.824323	0.60893	0.860928	1.09707	0.964726	1.10421	0.483344	1.25319
17	10.2	5	0	1.24253	1.12443	1.58845	1.2869	1.58439	1.35485	0.879311	1.52179	1.23961	1.09694	0.796534	1.28684	0.927655	1.09002	0.798169	1.08484	1.17285	1.25729	1.23407	0.829527	0.912441	1.12502	0.881109	0.747081	NaN	0.345258	1.31054	1.01352	1.75501	0.901185	1.22386	1.01367	0.614562	0.973119	0.695756	0.906067	1.23081	1.17941	0.817913	0.592334	1.24316	1.12277	0.795546	0.847137	1.25266	1.39658
17	10.75	2	0	0.926691	0.64553	0.86212	0.952614	0.529312	0.49391	1.32211	1.18603	0.887453	1.31227	0.195491	0.456056	1.15424	1.13747	1.26585	0.683956	0.957578	0.812005	0.578634	0.864283	0.620322	0.562424	1.17493	0.980898	NaN	0.369909	1.07646	0.717378	0.578633	1.04804	0.87021	0.860531	1.06284	0.732831	0.75731	0.652485	0.754679	0.602223	0.728263	0.830555	0.640307	0.681484	0.873495	0.943598	0.927484	0.773227
17	11.425	0.5	0	0.871068	0.966375	1.49939	1.34837	0.991605	1.2245	1.73428	1.67176	1.04571	1.04439	1.55731	1.6461	1.46972	1.1831	1.22609	1.2512	1.56801	0.762829	1.25298	1.18565	1.31519	0.944591	1.10341	0.990326	NaN	1.34185	1.04758	0.842587	1.6547	1.44687	1.13153	1.09467	1.21165	0.761137	1.1581	0.786228	0.915466	0.608624	1.09506	1.19016	1.08784	1.11426	1.21423	0.988114	0.797714	0.98019
17	12.825	2	0	0.661377	0.766768	0.375698	0.466519	0.837638	0.989096	0.322301	0.822881	0.867185	1.09427	0.596193	1.01046	1.12956	1.26458	1.14216	1.11377	1.18971	1.50862	0.665489	0.899379	0.641109	0.888118	0.98861	1.23333	NaN	1.4465	1.11512	1.66672	0.28253	0.540893	0.69237	1.54107	0.659129	1.13206	1.02948	1.16986	0.773914	0.830332	1.07983	1.33092	0.738515	0.773965	0.865472	0.975148	0.717263	0.722777
17	14.15	3	0	0.791389	0.892021	1.15369	0.9334	0.827844	0.848203	1.00174	1.15293	1.24384	0.857995	1.46275	0.999643	1.18661	0.870612	1.39328	0.979607	0.929533	0.976494	0.784924	1.2784	0.99351	0.729808	0.535072	0.7743	NaN	0.686614	0.46375	0.87857	1.06292	1.25548	0.979448	0.706396	1.47437	0.947065	1.37968	0.93204	0.891104	0.803907	1.26283	0.963846	0.966843	0.752483	0.974241	0.883347	0.957237	0.496628
17	15.025	0.333333	1	1.05615	1.02995	0.798288	0.38332	0.968108	1.22504	0.350233	0.797071	0.796348	0.947581	0.409473	0.45675	1.11494	1.00495	1.3071	0.621496	1.0653	1.22066	1.36623	0.795524	1.43134	0.794296	0.67767	0.760815	NaN	0.566855	0.83664	0.923553	0.632589	1.41878	0.951156	0.921953	1.37668	1.26916	1.12352	1.49287	1.28769	0.745303	1.51846	1.3149	0.947625	1.01402	0.839034	1.04722	0.780156	0.781416
17	15.75	1	1	1.24699	1.34504	0.90044	0.768408	0.823006	0.808162	1.14078	0.903321	0.779871	0.714502	1.13043	0.790504	0.725005	0.737387	0.453111	0.698428	1.15849	1.19651	1.25636	1.23344	0.992028	1.04307	1.13363	0.916195	NaN	0.367504	1.2008	0.959873	1.35171	0.9407	1.20312	1.18343	1.49866	1.09118	1.44791	0.874753	1.19586	0.88465	1.55012	1.23441	1.39413	0.897169	0.945971	0.833637	1.21429	0.976266
17	16.55	1.5	1	0.807183	0.93699	0.584083	0.708691	0.588644	0.517422	1.45289	1.08016	1.52318	0.739056	1.10545	1.22379	1.11638	1.06512	0.909989	0.751966	0.863696	0.819454	0.871784	1.39787	1.1442	1.29722	0.998821	1.06417	NaN	0.208904	0.569081	1.22731	0.454417	0.468823	0.726404	1.28854	0.760611	0.962399	0.686147	0.724738	1.38769	1.48571	1.21019	1.45651	1.35841	1.27887	0.911436	0.827174	1.07039	1.01708
17	17.175	2	1	0.888297	1.09952	0.662365	1.23041	1.2909	1.17114	1.54489	1.32444	1.1738	0.779215	1.47782	1.38285	1.28612	1.42909	1.56417	1.55747	1.355	0.874876	0.903362	1.01713	1.14879	1.10902	1.35189	1.24132	NaN	1.35187	1.23482	1.13741	1.71406	1.46949	1.24359	1.36646	1.10971	1.38727	1.01756	1.13887	0.907808	1.16887	1.39726	1.19783	1.22858	1.28991	0.957081	0.944866	1.42104	1.71059
17	19.5	0.666667	1	0.767475	0.908142	0.831996	0.964789	1.34729	1.57454	0.987294	0.746859	1.19667	1.31283	0.997945	1.36676	0.867096	1.29022	0.586582	0.473978	1.08671	1.21121	1.26095	0.981064	0.995603	1.12642	0.943313	1.07304	NaN	1.11339	1.16274	1.30141	1.15773	1.11283	0.428499	0.482202	0.658551	0.626502	0.708899	0.911887	0.609314	0.88635	0.97487	0.6392	0.712252	0.621312	0.790174	1.04476	0.384901	0.798288
17	19.65	0.666667	0	0.932064	0.845079	0.640707	0.850273	1.33708	1.41919	1.40403	1.52245	1.65575	1.59044	1.14687	1.54045	0.84269	0.930812	1.14029	1.14438	1.25653	0.967648	1.39951	1.35806	1.16173	1.30055	0.976951	1.20732	NaN	1.74312	1.20845	1.5479	1.57455	1.14849	1.26806	1.1438	1.22004	1.00724	1.12363	1.1023	0.777242	1.2507	1.48095	1.27192	0.864675	0.656607	1.15953	0.828755	0.927979	0.901479
17	20.2	1	1	0.896598	1.29726	1.37669	1.39438	1.02837	0.595796	0.850424	0.689799	0.818069	1.46535	0.813218	1.14147	0.909842	1.18551	0.737527	0.487412	0.601446	0.786276	0.679175	0.848773	0.81787	0.745592	0.787665	0.86825	NaN	0.768704	0.717669	0.710441	0.300554	0.45313	0.679104	0.445246	1.10285	0.946386	1.34611	0.962453	1.19378	1.21778	0.779491	0.878719	0.815576	0.544432	0.682599	0.897956	0.833796	0.593312
17	20.525	2	1	0.851037	0.637879	0.840247	1.14804	0.749799	1.38113	0.921776	0.661204	1.39689	1.59062	1.41997	1.12058	0.538775	0.931023	0.577735	0.618113	0.746883	0.787613	1.00359	1.22306	0.837904	1.0816	1.06946	1.26017	NaN	1.12683	0.711998	1.24681	1.6886	0.774369	1.30031	1.37591	1.1578	1.29029	0.728253	1.12571	1.20188	1.13886	1.32901	1.42705	0.703606	1.13361	0.987258	1.1484	1.21017	0.61795
17	21.125	0.5	1	1.21336	1.27947	0.468955	0.854462	1.52646	1.22844	1.34007	1.02775	1.38965	0.99261	0.866523	0.806866	0.671931	0.493468	0.976651	0.71797	0.845724	1.19859	1.43411	1.50973	0.93575	0.860663	1.14084	1.21519	NaN	0.579481	1.0501	1.45335	0.707871	0.626323	1.21527	1.30969	1.0521	1.19248	0.878632	1.12477	1.00485	1.21552	1.05337	1.47343	1.34606	1.23116	0.721388	0.901657	1.0685	1.02003
17	23.25	1	1	1.03186	1.06709	1.16124	1.55573	1.00272	1.40628	1.41602	1.34038	1.3313	1.09267	1.11513	0.957169	0.881791	0.675462	0.621372	0.729531	1.08322	0.725883	1.32309	1.19169	0.878872	0.587073	1.14322	1.19051	NaN	1.30498	1.04836	1.2257	1.65417	1.53805	1.43827	1.37383	1.40325	1.19105	1.48043	1.18943	1.0827	1.12221	1.34273	1.17678	1.45489	1.48506	0.97839	1.15622	1.40963	1.08575
17	23.7	2	1	1.03642	1.06018	1.00427	1.0112	0.906102	0.972101	1.24702	0.851117	1.3006	1.10278	1.17914	1.05888	0.858937	0.761359	0.723911	0.647104	0.479831	0.710786	0.840579	0.679718	0.954422	0.731695	0.825299	0.816316	NaN	0.427658	0.62566	0.553272	1.27236	1.03356	0.549967	1.15433	1.27279	1.09591	1.42128	1.13146	0.725218	0.956565	0.740634	0.713507	0.705762	0.61099	1.11141	1.05488	0.938923	0.779603
[truncated: 40 more columns]

## Sheet: Unfiltered
SubjectNumber	IntervalPosition	SubjectiveDuration	Confidence	LeftPrecuneus	RightPrecuneus	LeftIsthmusofthecingulate	RightIsthmusofthecingulate	LeftPosteriorcingulatecortex	RightPosteriorcingulatecortex	LeftCaudate	RightCaudate	LeftPallidum	RightPallidum	LeftMedialorbitofrontalcortex	RightMedialorbitofrontalcortex	LeftLateralorbitofrontalcortex	RightLateralorbitofrontalcortex	LeftParsorbitalis	RightParsorbitalis	LeftParstriangularis	RightParstriangularis	LeftCaudalmiddlefrontalcortex	RightCaudalmiddlefrontalcortex	LeftRostralmiddlefrontalcortex	RightRostralmiddlefrontalcortex	LeftSuperiorfrontalcortex	RightSuperiorfrontalcortex	LeftFrontalpole	RightFrontalpole	LeftCaudalanteriorcingulatecortex	RightCaudalanteriorcingulatecortex	LeftRostralanteriorcingulatecortex	RightRostralanteriorcingulatecortex	LeftParacentralcortex	RightParacentralcortex	LeftPrecentralgyrus	RightPrecentralgyrus	LeftPostcentralgyrus	RightPostcentralgyrus	LeftSuperiorparietalcortex	RightSuperiorparietalcortex	LeftSupramarginalgyrus	RightSupramarginalgyrus	LeftInferiorparietalcortex	RightInferiorparietalcortex	LeftSuperiortemporalcortex	RightSuperiortemporalcortex	LeftBanksoftheSuperiortemporalsulcus	RightBanksoftheSuperiortemporalsulcus
1	1.55	2.71667	1	1.23922	1.17111	0.727544	0.904297	0.933559	0.924191	0.336785	0.428375	0.607314	0.510739	0.428977	0.693061	0.336985	0.660348	0.446419	0.95992	0.809012	0.473046	0.736764	0.566934	0.612183	0.601085	0.50732	0.382791	NaN	0.772902	0.441261	0.522191	0.306819	0.258484	0.777612	0.675245	0.910267	0.736816	1.04919	0.9137	1.06831	0.985538	0.503011	0.560062	0.704581	0.912028	0.351284	0.38977	0.499349	0.514925
1	1.775	2.01667	1	0.84895	1.1889	0.517124	0.202772	0.630939	0.704206	1.01972	0.695083	0.777035	1.49704	1.09708	0.99789	1.28824	0.961163	1.43093	0.635457	1.24466	0.909218	0.983254	1.27035	1.17791	1.11062	1.18126	1.22811	NaN	1.01232	0.915115	0.73714	1.08715	1.31222	1.09641	1.1907	0.872499	1.11353	1.05621	0.839841	1.275	1.40247	0.634385	1.016	0.741769	0.840831	0.968449	0.537141	0.53512	0.407452
1	2.6	0.75	0	0.797207	0.705883	0.530605	0.249809	1.06607	1.04272	0.847477	0.471149	1.19382	1.04929	1.41323	1.38612	1.19834	1.45749	1.16015	1.19127	1.2687	0.861488	1.09724	0.969338	1.22046	1.02335	1.23951	0.971513	NaN	0.935029	1.11131	0.919442	1.37573	1.13126	1.09842	1.18651	1.143	0.592364	0.764677	0.821043	0.775968	0.658424	1.09837	0.77273	0.606523	0.96451	0.952236	0.941624	1.58421	1.21478
1	3.2	5.8	0	0.768371	0.951883	0.825708	1.55901	1.52365	1.4769	1.27298	1.41646	1.52033	1.81047	0.599912	1.18635	0.646984	0.903575	0.604214	0.889113	1.12891	1.10751	1.16174	0.955815	0.819435	0.80203	1.04651	0.945448	NaN	1.36493	1.08258	1.30868	0.756981	0.913021	1.13224	1.16414	1.33154	1.2287	1.25447	0.914426	0.936922	0.853745	1.29041	1.18224	1.11978	1.18811	0.985225	1.47294	1.37313	0.899228
1	4.875	3.35	0	1.06625	0.99768	1.31185	1.03374	1.67646	1.63839	1.76471	1.38673	1.56881	1.79663	1.60072	1.64947	1.61708	1.33922	1.70592	1.75202	1.3849	1.59394	1.35419	1.54902	1.38448	1.22531	1.52624	1.45038	NaN	1.77618	1.37571	1.36817	1.66673	1.68766	1.49327	1.60101	1.19757	1.30172	1.06237	1.42421	1.27814	1.54426	1.51825	1.6161	1.28168	1.17426	1.4274	1.12466	0.769137	1.57231
1	5.6	3	0	0.560108	0.534772	0.535936	1.09325	0.717721	0.596538	1.09542	1.12392	0.808767	0.863027	1.43555	0.939666	0.701928	0.527557	0.808613	0.820725	1.15728	0.9478	0.544129	0.600252	0.967829	0.629532	0.892228	0.7448	NaN	1.41549	0.845398	0.408822	1.39446	1.068	0.675112	0.875593	0.714145	0.661677	0.551423	0.500406	0.491903	0.431558	0.909523	0.820763	0.506893	0.841484	0.933504	1.22083	1.13053	1.09556
1	6.45	7.35	1	0.696744	0.673407	1.3933	0.616336	0.904368	0.789022	1.44476	1.18675	1.15436	1.3706	1.0306	1.30266	1.28019	1.62599	1.26925	1.00108	1.03784	0.980846	1.30115	1.22881	1.34352	1.28158	1.333	1.23803	NaN	1.72993	1.38787	1.13349	0.978317	1.23408	0.920429	1.18806	1.13462	0.845492	1.09433	0.944256	1.13664	1.0056	0.765484	1.00226	0.634176	0.483586	1.2357	1.12934	1.28884	1.23399
1	10	2	0	0.774892	0.524459	0.707651	0.241981	0.559767	0.867668	0.476236	0.66229	0.921294	0.43936	0.4033	0.273989	0.488382	0.344148	0.755405	0.797633	0.669666	0.638283	0.79424	0.642939	0.804418	0.566822	0.638452	0.746485	NaN	0.0170589	0.652301	0.640925	0.648625	0.556187	0.508447	0.67281	0.452201	0.567691	0.609911	0.60153	0.285092	0.420767	0.600132	0.804324	0.498633	0.492805	0.39423	0.252502	0.760802	0.907704
1	10.2	2.03333	0	0.271417	0.426863	0.162294	0.657192	0.375794	0.484421	0.691775	0.433687	1.08989	0.59555	0.185824	0.304122	0.493142	0.671964	0.638534	0.254874	0.36129	0.55912	0.152654	0.237304	0.457417	0.246437	0.367185	0.311937	NaN	0.0941615	0.413744	0.587603	0.556423	0.260605	0.475338	0.335279	0.416248	0.371733	0.610899	0.471886	0.417688	0.320966	0.351928	0.533948	0.342075	0.42275	0.291134	0.320565	0.315436	0.452481
1	10.75	8	0	0.89288	1.01075	1.52658	1.40389	1.3556	1.17407	0.983912	0.939341	0.668642	0.730382	1.19391	0.785702	1.55173	1.47771	1.70892	1.66853	1.45797	1.6202	1.11642	0.860549	1.07241	1.31215	1.30344	1.17055	NaN	0.995175	1.28602	1.60353	1.43706	0.949851	0.892994	0.764457	1.2563	0.844337	1.00756	0.79708	1.29789	1.21158	1.13224	0.936636	1.45505	1.09612	0.885879	0.728904	0.8829	0.559044
1	11.425	2.66667	0	1.24171	1.32596	0.740665	0.583446	0.601506	0.334266	0.471595	0.835916	0.55821	0.591417	0.663337	0.424152	0.776512	0.658827	0.465355	0.677925	1.06028	0.452852	0.880593	0.942298	1.04746	0.762346	0.94075	0.781865	NaN	0.740693	0.623134	0.513707	0.683473	0.441177	0.41221	0.380675	0.721363	0.534672	0.999454	0.660427	0.84788	0.802561	1.18415	1.05264	0.918765	1.04376	0.71798	0.615945	0.920248	0.570781
1	12.825	2.5	0	0.877235	1.05582	1.34814	1.33174	1.28534	1.02827	1.65126	1.57404	1.15814	0.856118	1.05288	1.04014	1.15765	1.42063	1.43298	1.23518	0.995771	1.23715	1.1963	1.16054	1.17172	1.36472	1.09062	1.06085	NaN	1.52542	1.38718	1.7282	0.475644	1.31742	1.24794	1.20783	1.35613	1.35426	1.19581	1.1603	1.53909	1.57543	0.709439	1.19156	0.976155	0.939222	1.13078	1.09737	1.20534	1.02986
1	14.15	4	0	1.33655	1.59895	1.30102	1.42261	1.25555	1.07596	1.61791	1.37397	1.07799	1.15311	1.29318	1.10378	0.72307	1.18407	0.96388	1.11352	1.02615	0.898876	0.949465	0.820532	0.73536	1.06087	0.834425	1.12431	NaN	1.32907	1.46448	1.55617	0.645875	0.773638	0.984161	1.25168	0.89993	1.01517	0.949667	1.03081	1.47339	1.29546	0.552365	1.04785	1.14066	0.934525	0.987862	1.24618	0.713385	0.879551
1	15.025	0.516667	1	1.32812	0.828425	1.38948	1.27963	1.43607	0.592391	0.987966	1.00167	0.593467	0.957618	1.17195	1.38197	1.18297	1.16392	0.808158	0.885771	1.48338	0.752592	1.03656	1.17307	1.13542	1.04377	0.888934	1.08175	NaN	0.95248	0.853206	0.79739	1.06385	1.53378	1.3173	0.781154	0.823074	1.08013	0.76252	1.20199	0.989207	1.07088	1.11416	1.18681	1.39223	1.23301	0.93297	1.46148	1.03359	1.0662
1	15.75	1.08333	0	1.42049	1.11791	1.00587	0.607028	1.05068	0.492092	1.19129	0.788782	0.923139	0.762407	1.16768	1.19228	1.40925	0.828049	1.60422	0.406243	0.892837	0.801096	1.385	0.679852	1.42632	1.57155	1.26703	0.787928	NaN	1.31058	0.80558	0.928926	1.75131	1.53135	1.02482	0.605314	1.45078	0.745695	0.86586	0.54858	1.22413	0.715717	0.723197	0.480692	1.61491	1.25223	1.12544	1.03708	1.59865	0.897228
1	16.55	0.566667	0	0.705587	0.384505	0.834424	0.442461	0.802128	0.690461	0.513079	0.396736	0.680108	0.448514	0.555821	0.229926	1.04086	0.734189	0.341328	0.876733	0.890074	1.06088	1.16251	1.22351	0.71954	0.903037	1.15924	1.15435	NaN	0.107841	1.17582	1.12442	0.831492	0.684855	0.770837	0.55765	1.31168	1.18049	0.990538	0.942037	0.797609	0.665641	0.817788	1.17529	0.754617	0.8148	0.971488	0.431775	0.895954	0.265936
1	17.175	2.35	1	0.873892	0.955228	0.726334	0.703496	1.31614	1.31733	0.31159	0.365821	0.659215	0.991628	0.923677	0.620378	0.898818	0.811933	1.385	0.877341	0.965902	0.618507	1.16796	1.22654	0.874763	0.976805	1.17697	1.11103	NaN	0.298126	1.2186	1.09394	0.977378	0.727115	0.718924	0.58966	0.780286	0.832862	0.938405	0.447295	0.62675	0.715842	1.08596	0.786415	0.456887	0.888272	0.758751	0.343641	1.33054	0.434667
1	19.5	5	1	0.761121	0.701125	0.534562	0.370768	0.251665	0.265824	0.768681	0.812326	0.573741	0.415604	0.328142	0.182419	0.61	0.515161	1.2079	0.823793	0.544356	0.341274	0.585085	0.383105	0.607553	0.360314	0.52721	0.454026	NaN	0.20865	0.13805	0.379667	1.00241	0.36045	0.683654	0.981384	0.90134	0.683623	0.911672	0.84919	0.90371	0.881603	0.801477	0.626568	0.737428	0.420338	0.86429	0.98243	1.18378	1.02113
1	19.65	1.36667	0	0.876182	0.737735	0.54285	0.923969	0.981288	0.673788	0.836033	0.796371	0.506534	0.593992	0.631449	0.893148	0.502517	0.469458	0.886548	0.501706	1.22576	0.466593	1.06639	1.17111	1.17795	0.785536	0.892285	0.811193	NaN	0.636354	0.876617	0.685869	0.70842	0.935843	1.01087	0.705684	0.883685	0.800424	0.936604	0.900126	0.785798	0.594196	0.660268	0.988209	0.983127	0.76076	0.645523	0.45348	1.0874	0.382746
1	20.2	3	1	0.454829	0.546655	0.335426	0.639272	0.454298	0.421638	0.975228	0.369011	0.286049	0.452966	0.466977	0.284687	0.633876	0.444434	0.745658	0.440044	0.939345	0.31001	0.428295	0.310729	0.507675	0.438991	0.41036	0.539606	NaN	0.299421	0.718581	0.691342	0.419149	0.247883	0.401306	0.550757	0.731198	0.254396	0.609994	0.28278	0.669726	0.54758	0.73351	0.37414	0.591425	0.308178	0.831803	1.06488	0.53478	1.0412
1	20.525	2.5	0	1.33225	1.03885	1.54097	1.57045	1.54494	1.50249	1.74738	1.58053	1.17272	1.7647	1.42884	1.41474	1.30244	1.4651	1.30958	1.28174	1.01667	1.41549	1.68748	1.34141	1.48538	1.61028	1.33734	1.36094	NaN	1.79585	1.29166	1.3321	1.08956	1.61231	1.29192	1.45034	1.3615	1.38208	1.20912	1.34264	1.04126	0.790621	1.14655	1.17168	0.990761	0.83821	1.32284	1.30009	1.40401	0.77235
1	21.125	3	1	1.52553	1.44557	1.57097	1.85854	1.46193	1.75384	1.09513	1.15861	1.25549	1.50487	1.12476	0.786739	0.848425	0.822779	1.36819	1.266	0.993385	0.759542	1.40794	1.34827	1.11267	0.913252	1.47094	1.17794	NaN	1.52914	1.29152	1.55679	1.15898	1.42177	1.55144	1.3641	1.25133	1.35417	0.942076	1.49341	1.46325	1.44587	1.49265	1.37983	1.59956	1.47881	1.27143	1.45547	1.50218	1.84561
1	23.25	0.35	1	1.65549	1.53582	1.65676	1.51705	1.73488	1.466	1.60838	1.60323	1.54519	0.874588	1.67941	1.62178	1.40237	1.40521	1.36689	1.5931	1.03238	1.4658	1.37905	1.33229	1.49108	1.41018	1.32837	1.34728	NaN	1.14131	1.43449	1.07785	1.65711	1.30807	1.68386	1.46465	1.42335	1.35003	1.48091	1.62075	1.19197	1.656	1.28609	1.4587	1.54294	1.48012	1.57029	1.46355	1.41302	1.64784
1	23.7	0.566667	1	1.42739	1.51156	1.38095	1.64067	1.42917	1.29369	1.68469	1.68181	1.79224	1.54026	1.01956	1.60268	1.63187	1.47319	1.12243	1.00691	1.10784	1.45708	1.38624	1.22986	1.13937	1.42967	1.15112	1.01964	NaN	1.65268	1.16624	1.30105	1.59534	1.31218	1.33927	1.60839	1.25152	1.57143	1.49482	1.59051	1.50954	1.43002	1.35056	1.39174	1.30271	1.24792	1.61054	1.40971	1.59135	1.12985
2	1.55	4.66667	0	0.729927	0.983201	0.890174	1.07397	0.578346	0.624143	0.767314	0.744192	1.27004	0.581566	1.20618	1.50395	1.24173	0.911154	1.87991	0.899088	0.963394	1.53223	1.34487	0.474528	1.22217	1.25069	1.24846	0.969311	1.13016	NaN	1.26684	0.758434	1.76206	1.59897	0.839392	0.813964	1.12298	0.736053	1.22752	1.05158	0.941748	0.748796	1.09258	0.755214	0.769446	0.889862	1.21215	0.705436	1.11673	1.32241
2	1.775	4	0	0.963272	0.906444	0.746398	0.683644	0.807262	0.927087	1.21875	0.743256	1.91231	1.00601	0.985588	1.63536	1.37021	0.899179	1.7279	1.24003	0.949923	1.60649	1.26528	1.05507	1.38342	1.44469	1.13947	1.18917	1.02231	NaN	1.56664	1.33621	1.78965	1.84555	0.870432	0.848898	1.0347	0.843906	1.11744	1.29535	0.629811	0.842672	0.744426	1.19237	1.00454	1.24378	1.39025	1.40849	1.73629	1.64405
2	2.6	7	0	1.06736	1.01326	0.974894	0.732053	1.55735	1.43196	1.56483	1.01139	1.7037	0.922452	1.11374	0.929015	1.18129	0.758401	1.41293	0.993834	1.06353	0.896244	1.25965	0.862954	0.82137	0.970125	0.879644	0.825957	0.984348	NaN	1.61436	1.61633	1.32488	1.55732	1.42435	0.752102	1.30926	0.852114	1.32883	0.921173	0.770133	0.875725	1.08304	0.99203	1.29364	1.17632	1.49247	0.734919	1.41446	0.2927
2	3.2	10	0	0.702463	0.669141	1.04159	0.589853	0.589293	0.501873	0.714614	1.31897	0.418065	1.78979	0.524881	0.638234	0.658966	0.963853	0.471756	1.58796	0.519818	1.27367	0.471424	1.21287	0.656979	0.814388	0.632239	0.476886	1.06902	NaN	0.92115	1.09859	0.360644	0.360281	0.448192	0.647696	0.893501	1.0115	0.569535	0.903356	0.863378	0.764242	0.737604	1.23236	0.90316	1.04144	0.532015	1.42849	0.899831	1.3738
2	4.875	9	0	0.829998	1.02318	0.829094	1.30054	0.611455	0.483733	0.766016	0.816971	0.663087	0.799386	1.0381	1.32997	0.701793	0.884422	0.459089	0.874476	0.579242	1.08976	0.722034	0.606656	0.936364	1.09026	1.0697	1.00956	1.69688	NaN	0.396812	0.567764	0.63257	0.787675	1.23559	0.623331	0.741218	1.21667	0.762058	1.24474	0.971879	1.41067	0.935304	0.926547	0.762517	1.34694	1.12951	1.30045	0.544214	1.08301
2	5.6	5.66667	1	1.39777	1.44757	1.10028	1.66187	1.29428	1.17925	1.61974	1.71139	1.03324	1.45829	0.774205	1.33459	1.54284	1.75943	0.948887	1.6701	1.40378	1.55341	1.31328	1.74717	1.21225	1.00407	1.27205	1.34673	1.57969	NaN	1.51046	1.36233	1.67253	1.63879	1.72293	1.14017	1.23212	1.52829	1.30167	1.6339	1.46531	1.47177	1.52032	1.44571	1.26498	1.21295	1.4783	1.65933	1.64571	1.64964
2	6.45	15	0	1.38783	1.44383	1.00834	0.905024	1.34657	1.20395	1.38189	1.09751	1.28949	1.58401	0.369483	0.862637	0.986688	0.940086	1.52141	0.630155	0.915083	0.830738	0.803062	1.3868	0.762247	0.987423	0.788048	0.848196	1.3704	NaN	1.61821	0.99489	1.30171	0.690896	1.41747	1.31448	0.958384	1.08428	1.32318	1.19833	1.56315	1.43519	0.910647	1.23773	1.11108	1.37685	0.727724	1.44147	1.0271	1.50974
2	10	7	0	0.887669	1.04613	1.28241	1.31492	1.4184	1.09028	0.760427	1.61258	0.907648	1.27895	1.33437	1.01465	0.650123	1.14491	0.556394	1.16949	0.911443	1.65948	1.45332	1.28439	1.09061	1.3869	1.32129	1.30166	1.46837	NaN	1.61045	1.49596	1.5071	1.40489	1.43731	1.03713	1.29797	1.3793	1.24201	1.18749	0.781537	0.763068	1.43743	1.23269	1.0124	0.944002	1.16451	1.28456	0.888848	1.18689
2	10.2	5.66667	0	1.11257	0.992678	1.47462	1.11579	1.2096	1.15318	0.733252	1.44168	0.745288	1.76359	0.795318	0.95428	0.441554	1.29038	0.208871	1.24681	0.937808	1.5661	1.15962	1.60025	1.06529	1.42507	1.41714	1.30353	1.35675	NaN	1.20849	1.2744	1.52061	1.27209	1.38957	0.991994	1.11038	1.17646	1.14086	1.16901	1.19463	1.14922	1.17429	1.10399	1.2025	1.01989	0.723938	1.20759	0.874363	0.931985
2	10.75	5	0	1.02589	1.04351	0.633912	0.531578	0.78021	1.03063	1.25698	1.26184	1.14482	0.827678	0.861588	0.87322	0.999654	0.923394	0.693659	1.09575	1.19966	0.838831	0.968695	1.0879	1.2051	1.24357	0.985603	1.21847	1.52648	NaN	0.726833	0.737339	0.847302	1.02109	1.42472	1.50909	1.12782	1.39857	0.829179	1.30871	1.05747	1.09833	1.35736	1.4885	0.952744	1.08176	1.11488	0.797548	0.971004	1.10513
2	11.425	3	0	1.58905	1.51253	1.43707	1.22157	1.2581	1.20271	0.706854	0.692499	1.00399	0.911479	0.253257	0.671658	0.562123	0.797044	0.284818	0.43265	0.399121	0.646236	0.594702	0.49047	0.795643	0.61273	0.732832	0.909931	0.777175	NaN	0.728982	0.502603	1.16853	0.681738	1.52546	1.55452	0.919726	0.86364	1.10831	1.15085	1.58107	1.56536	1.22284	0.883833	1.29682	1.02794	0.92868	0.616339	1.25455	1.02116
2	12.825	6	0	1.38515	1.2314	1.35905	0.981704	0.466739	0.894317	0.752631	0.97116	0.979996	0.722711	0.997334	0.45029	0.53208	0.549608	0.225615	0.589744	0.53643	0.562642	0.765791	0.998858	0.622355	0.89766	0.65515	0.666747	0.505934	NaN	0.726613	0.946544	0.507823	0.6727	1.32476	1.47043	0.770754	1.10527	0.73608	1.26094	1.2602	1.0874	0.920001	1.08228	0.767937	1.2239	0.806827	0.919153	0.689061	1.63043
2	14.15	7	1	0.382911	0.47933	0.42254	0.355438	0.407003	0.645377	0.635124	0.554499	0.746222	0.511305	1.62214	0.959362	0.800329	0.410984	0.316743	0.713411	0.827998	0.743869	0.452619	0.521697	0.667845	0.763456	0.540394	0.649747	0.366904	NaN	0.952928	0.604867	0.749945	1.17205	0.716061	0.340613	0.568317	0.6331	0.372653	0.675406	0.256689	0.387053	0.589575	0.40734	0.467496	0.272243	0.509031	0.735722	0.394478	0.799401
2	15.025	1.75	1	0.764464	0.482126	1.10015	0.819521	0.7839	0.520817	0.555489	0.548932	0.41215	0.726489	0.954051	0.395413	0.430483	0.706301	0.294535	0.338988	0.374896	0.51777	0.508267	0.87554	0.942475	0.434183	0.577845	0.519289	1.06281	NaN	0.451411	0.702441	0.458254	0.444768	0.628103	0.741175	0.458448	0.545252	0.850867	0.741847	0.584202	0.5286	0.395789	0.316034	0.35931	0.393592	0.851496	0.239769	0.721349	0.320521
2	15.75	2.16667	1	0.651727	0.803276	0.177149	0.274561	0.906401	1.01542	0.388268	0.385556	0.197902	0.237872	0.384413	0.293167	0.558224	0.327362	0.198926	0.198595	0.72982	0.327077	0.607024	0.360207	0.91598	0.53936	0.569163	0.453171	0.713877	NaN	0.197459	0.335887	0.489476	0.206212	0.229224	0.230583	0.368726	0.438822	0.451798	0.572554	0.385699	0.489238	0.43194	0.914145	0.687941	0.62193	0.416297	0.24058	0.284663	0.198734
2	16.55	4	0	0.460761	0.606318	0.262583	0.362335	0.294212	0.610615	0.354771	0.17902	0.139067	0.423821	0.796456	0.210476	0.655484	0.573861	0.208674	0.803413	0.815808	1.00846	0.857313	0.415383	0.677673	0.608647	0.626913	0.609916	0.55028	NaN	0.164645	0.349066	0.0966043	0.257031	0.207748	0.413903	0.691269	0.593356	0.477824	0.621465	0.95529	0.983956	0.471822	0.624928	0.578854	0.736013	0.472032	0.301574	0.201242	0.21626
2	17.175	5	0	0.938098	1.04702	0.972843	1.11487	0.549991	0.395402	0.410493	0.402158	0.307271	0.227165	1.09174	0.526667	1.10835	0.650086	0.428425	0.483936	0.614342	0.980316	0.428049	0.603202	0.688787	0.534315	0.767452	0.766772	0.851701	NaN	0.200557	0.296935	0.268275	0.294298	0.360792	0.898915	0.688413	0.567903	0.417953	0.831834	0.801221	1.15255	1.16775	1.36826	0.76626	1.47067	0.639263	1.10526	0.729365	0.756451
2	19.5	3	0	0.651118	1.11981	0.754966	0.944613	0.826635	0.528372	0.139744	1.16436	0.241555	0.469158	0.811155	1.14357	0.681682	0.986097	1.00052	0.415845	1.07084	0.86373	0.644083	0.381452	0.850716	0.831878	1.07345	0.856864	1.01043	NaN	0.642075	0.579773	0.987519	0.910476	1.12319	0.59764	0.76924	0.755473	0.758565	0.730671	0.652136	0.559551	0.740386	1.27869	0.614428	0.895449	0.959345	0.389273	0.508324	0.850015
2	19.65	3	0	0.582782	0.667599	0.372176	0.523716	0.70533	0.272623	0.203485	0.339899	0.240092	0.229361	0.797547	0.98653	0.523594	0.496902	0.905248	0.482727	0.608045	0.415111	0.893426	0.566529	0.862464	0.727797	0.965951	0.638737	0.729181	NaN	0.318228	0.594081	0.624172	0.658482	0.746425	0.458591	0.800072	0.669045	0.646913	0.745909	0.526097	0.756207	0.744464	1.15195	0.653549	0.864423	0.573116	0.28641	0.680276	0.934284
2	20.2	1.5	1	1.15543	1.21293	0.821423	0.717689	0.797558	0.798073	0.10941	0.225736	0.168775	0.218267	0.220724	0.107716	0.286214	0.141459	0.17614	0.315319	0.536732	0.72452	0.517756	0.667712	0.257896	0.340697	0.410054	0.595009	0.240582	NaN	0.262617	0.506495	0.0867825	0.161153	0.33293	0.566201	0.92338	0.587806	0.451769	0.774795	0.88324	0.738035	0.936803	0.751886	0.528917	1.11485	0.239673	0.354001	0.624928	0.370719
2	20.525	3.5	1	0.850805	0.901855	0.642581	1.29657	0.66105	0.743287	0.296359	1.18895	0.391253	0.628458	0.530903	0.554941	0.731596	1.01183	1.25541	0.454813	0.750781	0.407371	0.69442	0.736018	0.729659	0.669683	0.615292	0.600283	0.321563	NaN	0.931156	0.736202	0.631817	0.738564	0.682092	0.930682	0.837107	0.762813	0.837374	1.02114	1.02513	0.65725	0.601227	0.428409	0.887549	0.70308	0.958431	0.82264	0.75525	0.470542
2	21.125	3.16667	1	0.636156	0.715647	0.653397	0.885735	0.360013	0.768042	0.696105	1.51706	1.44205	1.3815	1.00905	0.949092	0.964644	1.5026	0.85444	1.4597	1.30055	1.48487	1.15508	0.811641	1.04555	1.23784	1.15892	1.18587	0.654657	NaN	1.43638	1.42238	1.34457	1.47717	0.666883	0.865067	0.997658	0.987667	1.02033	0.719198	0.553713	0.63452	0.876261	0.541343	0.608471	0.414965	1.2354	1.2057	0.967101	1.43484
2	23.25	2	0	1.13286	0.906002	0.703481	1.08207	0.762854	0.958994	0.849589	0.169988	0.534885	0.51258	0.712892	0.136039	0.345614	0.351416	0.153858	0.200843	0.626117	0.748378	0.389751	0.904133	0.394777	0.44074	0.478754	0.561861	0.290903	NaN	0.281756	0.482672	0.114422	0.102468	1.09935	0.677497	0.68752	1.00207	0.650805	0.87291	0.789731	0.928203	0.72124	0.757492	0.654246	0.906442	0.540792	0.900347	0.614243	0.579945
2	23.7	1.5	1	0.656733	0.645974	0.536939	0.65267	0.191025	0.310867	0.559918	0.371308	0.229959	0.313765	0.550281	0.192646	0.347999	0.189301	0.134143	0.158694	0.317759	0.28996	0.241696	0.399195	0.268986	0.283498	0.185004	0.273234	0.217429	NaN	0.0944195	0.119152	0.265512	0.205422	0.463654	0.499123	0.275005	0.387913	0.208968	0.562292	0.221208	0.31	0.18381	0.303701	0.294876	0.241464	0.17368	0.315051	0.168429	0.287651
3	1.55	3	1	0.366256	0.283393	0.565091	0.246613	0.226299	0.19193	0.248429	0.265254	0.29744	1.01182	0.177603	0.167578	0.312812	0.300794	1.01168	0.50871	0.174386	0.317388	0.112531	0.296176	0.202234	0.231336	0.195794	0.214512	NaN	NaN	0.240473	0.209349	0.222643	0.277325	0.204878	0.0966475	0.266064	0.301547	0.226984	0.222574	0.167624	0.0797909	0.276199	0.264209	0.421683	0.0858985	0.190104	0.429354	0.320165	0.16795
3	1.775	4	1	0.817491	0.536247	0.254856	0.954628	0.59808	0.694547	0.235447	0.428485	0.484116	0.758391	0.0856399	0.156492	0.136279	0.253464	0.384508	0.209817	0.084577	0.403825	0.153225	0.275475	0.245832	0.329768	0.230752	0.256832	NaN	NaN	0.208754	0.293528	0.0603747	0.247868	0.161811	0.233983	0.101071	0.248332	0.16926	0.140715	0.349562	0.168193	0.24721	0.192235	1.1571	0.287199	0.1713	0.404487	0.595339	0.177192
3	2.6	2	0	0.376585	0.365695	0.619753	0.57173	0.606255	0.833667	0.362946	0.276056	0.274901	0.591134	0.168147	0.275389	0.273218	0.657099	1.06516	0.723977	0.301601	0.241877	0.327126	0.380855	0.37676	0.434956	0.416545	0.457493	NaN	NaN	0.408684	0.395068	0.45151	0.372733	0.366801	0.289779	0.207937	0.368601	0.275013	0.193826	0.367478	0.156714	0.233288	0.154546	0.586121	0.2435	0.40895	0.369472	0.466775	0.228428
3	3.2	7	1	0.476033	0.44525	0.99535	0.517802	0.686635	0.858959	0.793405	0.753199	0.807911	0.939217	0.478291	0.451673	0.658982	0.918853	0.810728	1.03972	0.73632	0.895347	0.502012	0.525348	0.561284	0.616656	0.528476	0.544843	NaN	NaN	0.559685	0.641728	0.788858	0.564635	0.762211	0.862084	0.480082	0.385217	0.489109	0.302311	0.496043	0.241369	0.543716	0.401686	1.02522	0.404803	0.473323	0.446	0.98477	0.236868
3	4.875	4	1	0.965827	1.06782	0.908665	1.04941	0.949906	1.18433	0.583476	0.428901	0.538991	0.948374	1.05061	1.08472	1.1047	0.957696	0.63573	0.67833	0.873636	0.783805	0.536255	0.588967	1.00478	0.877954	0.89999	0.84552	NaN	NaN	1.46767	1.53465	0.927327	1.25753	1.0244	1.07792	1.06831	0.829048	1.03738	0.686325	1.02274	0.844346	0.991877	0.593564	1.067	0.983607	1.11939	1.0087	1.10929	0.540192
3	5.6	2	1	0.844542	1.10922	0.935829	1.02039	0.978493	1.33011	0.940222	0.774511	0.881603	0.976855	1.06045	1.19295	1.02765	0.911913	0.488686	1.06184	1.20202	1.31441	0.608014	0.884873	1.15464	1.11171	0.998577	0.731307	NaN	NaN	0.962813	0.870652	0.715913	0.886537	0.921292	0.615854	0.867397	0.853567	0.953939	0.783423	0.751029	0.893114	0.767598	1.01956	0.614457	0.861428	1.00944	0.654184	0.841054	0.415137
3	6.45	6	1	0.953976	0.789125	0.726074	1.46067	0.685577	0.805268	0.687794	0.419126	1.08355	0.65302	0.365435	0.607165	0.517593	0.538512	0.344111	0.669789	0.493458	0.455365	0.771267	0.644031	0.711746	0.577849	0.680073	0.801518	NaN	NaN	1.00923	0.574452	0.437568	0.252304	0.652247	0.481296	0.83438	0.70756	0.526684	0.868344	0.55569	0.808501	0.988998	1.03586	0.571445	0.649166	0.765603	1.0179	0.804377	1.14338
3	10	1	1	0.968632	0.932974	1.37029	1.0531	1.15405	1.01479	0.794191	0.93621	0.861048	1.02613	0.81829	0.960176	1.07044	0.775087	0.645925	0.87197	0.568909	0.469778	0.857099	0.416559	0.659168	0.773106	0.40404	0.506591	NaN	NaN	0.73996	0.910199	0.476863	0.972819	0.880778	0.780093	0.663224	0.867998	0.62466	0.554961	0.95539	0.576348	0.923283	0.73108	1.13392	0.703589	0.610059	0.722349	0.504701	0.804651
3	10.2	5	1	1.33484	0.988544	1.11859	0.930315	1.36988	1.1474	0.657802	0.76902	1.02482	1.03346	1.00621	1.09283	0.904367	0.953667	1.01925	0.587229	0.558874	1.19782	0.395736	0.554115	0.67566	0.767559	0.694537	0.658984	NaN	NaN	1.16535	1.09607	1.12057	1.36333	0.978554	0.996876	0.621994	0.540481	0.606881	0.565662	1.11423	0.890606	0.923233	0.517322	1.47184	0.6926	0.682608	0.596931	1.03077	0.426552
3	10.75	4	0	0.802878	0.588499	0.974989	0.637295	0.819739	0.730588	0.289146	0.506964	0.349495	0.559181	0.140578	0.351958	0.313849	0.57031	1.14254	0.548953	0.504025	0.484988	0.350812	0.352129	0.310391	0.395631	0.354117	0.480027	NaN	NaN	0.484815	0.601111	0.531346	0.397025	0.452513	0.371974	0.281967	0.326591	0.409398	0.293132	0.48036	0.258673	0.653127	0.422968	0.756022	0.355306	0.611578	0.408178	0.588789	0.342079
3	11.425	3	1	0.783361	0.80778	0.299261	0.993611	0.879445	1.11638	0.85439	0.907944	0.781049	0.444528	0.386789	0.589504	0.800595	0.940568	1.64143	1.07663	1.39035	0.817757	1.12491	0.826378	0.701292	0.850483	0.83797	0.728346	NaN	NaN	0.557061	0.869357	0.847902	0.83814	0.381915	0.378325	0.718661	0.619682	0.637385	0.485708	0.719622	0.352736	1.17631	0.67016	0.78622	0.681002	0.939331	0.719944	1.17192	0.671309
3	12.825	0.5	1	0.758774	0.771379	1.05008	1.22592	0.8979	0.970307	0.35483	0.41373	0.385394	0.492194	0.221398	0.678407	0.262885	0.301595	0.599546	0.201899	0.332169	0.277508	0.274216	0.6085	0.369449	0.513793	0.464464	0.318192	NaN	NaN	0.316009	0.624596	0.485015	0.47984	0.725098	0.726126	0.563245	0.417094	0.482855	0.337183	0.6282	0.646719	0.485571	0.223118	0.760852	0.311032	0.422944	0.403028	0.704109	0.197644
3	14.15	4	1	1.05012	0.98701	1.56314	1.14357	1.3051	0.989311	1.25549	1.29732	0.912756	1.43404	0.875911	0.822147	1.22344	1.12219	0.826477	1.11561	0.46747	0.624122	0.871433	0.892173	0.681245	0.674193	0.611683	0.905351	NaN	NaN	0.718639	0.879478	0.656442	0.561702	1.15322	0.893184	0.73571	0.873516	0.669112	0.803489	1.16798	0.82747	0.788252	0.578278	1.27719	0.642107	0.477156	0.667309	0.851617	0.563672
3	15.025	2	0	1.03776	1.01348	1.07838	1.10927	1.15737	1.08837	1.19791	1.00752	1.07823	1.2613	0.586693	0.578872	0.901472	0.922239	0.928882	0.755641	0.573915	0.775856	0.956726	1.31739	0.987186	0.825148	1.02046	0.918976	NaN	NaN	0.655752	1.08144	0.414571	0.510407	0.971449	0.765846	0.790165	1.06979	0.383634	0.966994	0.571152	0.594236	0.829404	0.732008	0.84667	1.16993	0.436508	1.03527	1.32919	1.32509
3	15.75	2	1	0.727702	0.499097	0.612193	0.774014	0.488204	0.568698	0.412418	0.820715	0.330795	1.0641	0.571152	0.516608	0.484328	0.699756	0.253809	0.41608	0.430674	0.810835	0.438947	0.83076	0.657097	0.650599	0.65956	0.734085	NaN	NaN	0.512904	0.641212	0.582501	0.604201	0.374242	0.312732	0.461275	0.593993	0.307615	0.367231	0.283715	0.331582	0.533741	0.631878	0.606151	0.895437	0.696096	0.789307	0.392797	1.00039
3	16.55	1	1	0.998459	0.887113	1.23284	1.36909	1.03084	0.502528	0.456661	0.502508	1.07734	0.561832	0.34581	0.56032	0.56933	0.672391	0.810138	0.503414	0.664119	0.754681	0.950461	0.883628	1.04317	0.988014	0.660417	0.713623	NaN	NaN	0.587122	0.634297	0.356175	0.389696	0.288324	0.20534	0.485362	0.696666	0.3254	0.661736	0.813843	0.341519	0.300036	0.57321	1.13037	0.938051	0.439895	0.77617	0.642286	0.276147
3	17.175	1	1	1.27208	0.908496	1.35352	0.4792	0.614722	1.23784	0.533927	0.999907	0.461726	0.354856	0.422785	0.502419	0.698758	0.363369	0.835759	0.315426	1.13098	1.12706	0.954647	0.821419	0.996559	0.949316	1.10671	1.07946	NaN	NaN	0.425127	1.15978	0.51969	0.420272	0.376208	0.863027	0.591998	1.11292	0.658356	1.01892	0.786651	0.878434	1.20366	0.977393	1.24898	1.13517	1.14163	1.03615	0.607862	0.984069
3	19.5	1	1	1.38944	1.29449	1.08476	1.12678	1.16882	1.17857	1.32911	1.31049	1.51626	1.16291	1.15834	0.967647	0.958397	1.05242	0.979158	1.37461	0.824829	1.03937	0.593469	1.00367	1.01401	1.01928	0.733613	0.928824	NaN	NaN	0.782074	0.862899	1.10548	1.23977	1.15517	1.15251	1.0342	0.997241	1.06418	1.20696	1.19596	1.12734	0.924663	1.05105	1.04463	0.944187	0.968021	0.662499	0.962077	0.647853
3	19.65	2	1	1.49619	1.20444	1.53518	1.45127	1.33299	1.08105	1.23313	1.19088	1.66368	1.29015	1.47301	1.24122	1.468	1.49548	1.50361	1.58485	1.38009	1.25166	1.53396	1.28739	1.06383	1.28828	1.68291	1.55056	NaN	NaN	1.72088	1.02067	1.24673	1.49806	1.01828	1.31059	1.28081	1.33596	1.26651	1.53553	1.4663	1.63035	1.3297	1.33129	1.41057	1.50138	1.52438	1.3686	1.19925	1.29716
3	20.2	2	1	1.19475	1.49201	1.46577	1.42297	0.973591	1.15447	1.38297	1.1994	1.59543	1.1641	1.45524	1.36411	1.11412	1.30678	0.909698	1.16115	1.11797	1.65649	1.16268	1.35286	1.01795	1.33802	1.19425	1.23737	NaN	NaN	1.26626	0.82463	1.41306	1.26327	1.07845	1.45256	0.797036	1.01066	1.06496	1.39077	1.12833	1.38321	1.26848	1.40008	1.09355	1.42473	1.40383	1.5305	1.4368	1.67091
3	20.525	0.5	1	0.972254	1.09587	0.939996	0.688574	0.90224	0.73169	0.909038	0.594635	1.08006	0.914859	0.923089	0.710774	0.854692	0.655159	0.818027	0.576944	1.20841	0.641566	1.20541	0.643824	1.01542	0.787395	0.635482	0.726916	NaN	NaN	0.708952	0.8089	1.05052	0.671558	1.08068	0.753665	0.91204	0.844736	0.617576	0.840281	1.3372	0.726254	0.997512	0.570446	0.671982	0.862018	0.587727	0.809164	0.85505	0.709352
3	21.125	1	1	0.982551	0.746461	1.70288	1.40032	0.845816	0.54052	0.818043	0.939916	1.25061	0.539216	1.22032	0.76165	0.96638	1.23179	1.05774	1.08371	1.26609	0.967401	0.822356	0.921824	1.33073	0.972816	0.938967	0.810013	NaN	NaN	1.24055	1.13367	0.814928	1.01046	0.831299	1.04612	0.848159	0.883435	0.600736	0.752401	0.791107	0.66965	1.1315	1.11689	1.52908	1.23641	1.24442	0.955203	1.1808	1.14286
3	23.25	2	1	1.06455	0.965949	0.882603	1.29303	0.606042	0.874463	0.700791	0.970177	0.403061	1.18216	0.481576	0.422514	0.548973	0.531064	0.265605	0.689168	0.709822	0.778145	0.778161	0.852067	0.823857	0.790068	0.925813	0.74294	NaN	NaN	0.56248	0.658717	0.458464	0.575106	0.717966	0.917963	0.724864	0.631493	0.644417	0.842508	1.33471	0.866345	0.973302	0.95035	1.22193	1.17139	0.843385	0.573542	0.913928	0.973082
3	23.7	0.166667	1	0.359689	0.722832	0.513612	0.701452	0.816076	0.781987	0.817543	1.08027	1.04414	0.420005	0.91368	1.12456	0.84648	0.884433	0.661311	0.824056	0.657556	0.694328	0.694113	0.924451	0.633043	0.952301	0.632904	0.885598	NaN	NaN	0.955573	0.606208	0.948679	1.19383	0.647434	0.473103	0.317989	0.840935	0.585756	0.899483	0.249658	0.627203	0.682231	0.814202	0.251897	0.893151	0.973796	0.794073	0.294073	0.949131
4	1.55	4	1	0.821109	0.832629	0.682692	0.853686	0.537703	0.407139	0.616715	1.03558	0.438088	0.726132	0.956659	0.777899	1.12226	1.30175	1.33149	1.23666	0.577941	1.21286	1.09917	0.850983	1.11099	1.03615	0.976556	0.833021	NaN	1.2596	1.0707	0.366414	0.922629	1.04652	0.577078	0.736449	0.813468	0.941009	1.01224	1.26873	1.16662	1.4579	0.811779	1.35114	1.02563	1.338	0.711816	1.01516	0.656104	1.41257
4	1.775	4	0	1.16161	1.2928	0.537727	0.766233	1.04183	1.02208	0.778763	1.2293	0.499442	0.764979	1.46008	1.42488	1.08679	1.43004	1.44917	1.33462	0.632944	0.998763	0.975678	1.00153	1.33318	1.09322	0.971752	0.947195	NaN	0.972103	1.3628	0.603686	1.02825	1.30387	1.03197	1.18613	0.646497	1.10675	1.06729	1.4171	1.2907	1.60156	0.914807	1.55781	1.08736	1.68564	0.849558	1.38191	0.532118	0.997134
4	2.6	3	1	0.56369	0.499602	0.524263	0.550682	0.461035	0.249627	0.63484	0.787054	0.48508	1.0723	0.76143	0.902828	0.689498	1.03699	0.953671	1.08083	0.204105	0.778541	0.741314	0.317698	0.761708	0.600983	0.630141	0.500059	NaN	0.430321	0.680869	0.346052	0.312558	0.392572	0.894308	0.435389	0.656368	0.325354	0.765476	0.345484	0.851722	0.746769	0.716667	0.505761	0.627728	0.627001	0.476089	0.711878	0.656935	0.406065
4	3.2	5	0	0.989488	0.665239	0.721977	0.394844	0.392148	0.918238	0.242304	0.755057	0.355356	0.843155	0.274835	0.491577	0.527825	0.437857	0.493559	0.39246	0.121756	0.425225	0.640819	0.39291	0.587257	0.564557	0.612848	0.811292	NaN	0.509346	0.768283	0.506373	0.559225	0.408349	0.565702	0.504008	0.456935	0.443382	0.679549	0.508464	0.948885	0.789007	0.52202	0.382778	0.788357	0.875202	0.328046	0.748051	0.552466	0.76991
4	4.875	3	0	0.703194	0.969037	1.02015	0.355988	1.44115	1.48686	0.576951	1.37166	0.798781	0.380803	1.03497	1.35801	0.565758	0.947891	0.514687	0.837745	0.19895	0.743941	0.8975	0.746301	1.16088	1.43919	0.946672	0.985054	NaN	1.12183	0.945426	1.44659	0.759434	0.88985	0.833579	0.91461	0.550588	0.824538	0.424199	0.78576	0.514261	0.267623	0.877092	1.0873	0.640593	0.868725	0.56316	0.792569	0.489615	0.882139
4	5.6	2	0	0.539107	0.809826	0.62833	0.358392	0.558988	0.71602	0.529697	0.519037	0.534789	0.553602	0.378807	0.762907	0.237076	0.897178	0.315488	0.569853	0.226966	0.569436	0.524467	0.386054	0.400197	0.871176	0.369984	0.407376	NaN	0.6461	0.432781	0.671471	0.497799	0.498116	0.839169	1.02998	0.559136	0.670379	0.833684	0.633877	0.610447	0.662079	0.359514	0.670898	0.302178	0.813376	0.406871	0.853393	0.540192	1.04589
4	6.45	3	1	1.484	1.66197	1.69567	1.92601	1.40446	1.25911	1.60023	1.47815	1.72165	1.26887	1.8049	1.74002	1.87455	1.58893	1.72627	1.75547	1.92732	1.56603	1.38823	1.31722	1.36973	1.58533	1.38859	1.2682	NaN	1.80526	0.814692	1.36405	1.51471	1.6897	1.43647	1.64056	1.45548	1.41774	1.49613	1.48993	1.61587	1.59072	1.37271	1.06999	1.71005	1.51879	1.5531	1.5089	1.84433	1.82664
4	10	3	0	1.11754	0.969338	0.914876	0.857211	1.18374	1.36457	1.32242	1.30982	0.987973	1.11123	0.969635	1.53586	0.782046	1.44153	0.985221	1.47087	0.775813	1.31454	1.25428	0.975123	1.16556	1.26052	0.928607	0.952069	NaN	1.59595	0.526255	0.679162	0.944822	1.05278	1.25416	1.04589	0.703133	0.658083	1.08545	0.785914	0.850456	1.09944	0.985623	0.640685	0.850148	0.941568	0.811099	0.905983	1.03203	0.935401
4	10.2	5	0	0.956139	1.09545	0.829653	1.22107	1.25989	1.19832	1.54459	1.32357	1.74785	1.47443	1.21641	1.18443	1.24146	1.23856	1.58127	0.818547	1.42072	1.12258	0.717875	1.31311	1.05091	1.00011	0.966207	1.14372	NaN	1.28909	1.1466	1.39591	1.57156	1.31093	1.00052	1.56859	0.887912	1.10565	1.0921	1.26961	1.38763	1.26204	1.27192	1.40245	1.18888	0.97362	1.10491	1.00671	1.21734	1.01313
4	10.75	4	1	0.727494	0.430591	0.99328	1.14456	0.782382	0.42172	0.660715	0.46936	0.454567	0.399256	0.681677	0.516609	0.532454	0.572583	0.22411	0.497218	0.653323	0.177618	0.290665	0.224401	0.778224	0.335292	0.479463	0.550023	NaN	0.381435	0.605556	0.43735	0.755237	0.669442	0.773285	0.776537	0.73471	0.56344	0.744285	0.419035	0.508667	0.213526	0.7563	0.499622	0.492434	0.348434	0.49395	0.256451	0.877966	0.266757
4	11.425	2	0	1.0716	0.883057	0.772267	1.10204	0.661517	0.991913	1.21503	1.01155	1.15131	0.771809	1.44611	1.07811	0.959861	0.984277	0.634842	0.915329	1.24283	1.00499	0.677182	1.06724	1.00007	0.998392	1.13648	1.24556	NaN	0.825978	1.32118	1.38673	1.06744	1.2232	1.37108	1.5599	1.25998	1.15338	1.3351	1.28509	0.975749	0.798428	0.994998	0.888621	0.879167	0.759485	1.18225	0.962921	0.777982	1.07857
4	12.825	2	0	0.634464	0.708706	0.659544	0.847308	0.745086	0.858687	0.436316	0.299993	0.145628	0.240445	0.206184	0.220204	0.239193	0.331884	0.0827818	0.551095	0.186505	0.267442	0.497989	0.443035	0.341313	0.500771	0.282903	0.406001	NaN	0.152677	0.439637	0.239738	0.502319	0.281178	0.642391	0.708467	0.373305	0.33088	0.458202	0.403492	0.573179	0.650881	0.570153	0.319974	0.69453	0.715173	0.35406	0.467557	0.384011	0.53809
4	14.15	4	1	0.380134	0.312977	0.431027	0.464355	0.380939	0.279866	0.579839	0.571004	0.14844	0.416195	0.441763	0.637334	0.690674	0.786285	0.353884	0.616209	0.464144	0.467584	0.523592	0.382334	0.425238	0.473647	0.343059	0.386675	NaN	0.229362	0.34869	0.195132	0.492404	0.361907	0.617386	0.790047	0.520611	0.471595	0.809219	0.738493	0.731446	0.803966	0.686243	0.813779	0.466596	0.368642	0.49139	0.591974	0.43385	0.257328
4	15.025	2	1	0.682227	0.82388	0.389433	0.393585	0.931377	1.08404	0.618378	0.924814	0.534712	0.242907	0.741078	0.744122	0.960306	0.945239	0.529434	0.847267	1.16207	1.44957	0.825805	1.31149	0.937416	0.876967	1.12085	1.12686	NaN	0.621074	0.914616	0.994633	0.738222	0.92036	0.484125	0.83697	0.882271	1.16152	0.874382	0.913154	0.646101	1.03364	1.39286	1.33628	0.683562	0.898936	0.99135	0.793374	0.780501	1.44624
4	15.75	1	1	1.05092	1.25577	1.30952	1.27751	1.34959	1.39537	1.19396	1.29805	1.19472	1.43622	1.58279	1.1133	1.28747	1.38963	1.07932	1.28659	0.97916	1.33006	1.37571	1.7135	1.32444	1.46238	1.40774	1.52047	NaN	0.659404	1.68889	1.56173	1.46988	1.53262	1.37499	1.42437	1.25062	1.35614	1.1382	1.35729	1.42802	1.71162	1.38194	1.08259	1.02631	1.65458	1.29114	1.2488	0.914857	0.867456
4	16.55	2	1	1.12825	0.858236	1.01921	0.878118	1.15094	0.705536	1.08353	0.809258	0.807421	1.35138	0.795462	0.644945	0.625767	0.930689	0.831464	0.724529	0.685582	0.869973	0.941991	0.419166	1.20728	0.688103	0.876111	1.01336	NaN	0.302584	0.824855	0.999883	1.14549	0.785796	1.07788	0.76146	1.23385	1.07748	1.06355	1.07175	0.645188	0.680135	1.0559	1.05403	1.46123	0.760728	0.944162	1.05757	0.758438	0.903618
4	17.175	2	1	1.32353	1.21928	1.28173	1.65443	0.815663	0.803392	0.800087	0.74111	0.467794	0.765479	0.823974	0.974437	0.679814	0.968496	0.693053	0.787559	1.03784	1.06688	0.846738	0.850318	0.739779	1.15476	0.814568	0.922246	NaN	0.846081	0.519171	0.641677	0.528045	0.661709	0.890509	0.71573	0.842982	0.712363	0.979901	0.804915	0.661056	0.989906	1.00176	0.692174	1.10559	0.90863	0.909805	1.25311	0.841926	1.29034
4	19.5	3	1	1.23494	1.08532	0.838496	0.508913	0.976479	0.914514	0.679275	0.956126	0.346071	0.820196	0.563215	0.569729	0.720881	0.621264	0.848157	0.936065	0.799745	0.44414	0.99597	0.685931	0.844891	0.624446	1.00545	0.904205	NaN	0.610612	1.11582	1.40201	0.319722	0.420007	0.78822	0.547776	0.592131	0.55531	0.753684	0.79172	0.855649	0.694437	1.29187	0.716398	0.829857	0.93119	0.631326	0.836695	0.381542	0.961321
4	19.65	4	1	0.970596	1.09751	1.05144	0.62519	1.26593	1.11822	0.487192	0.826512	0.669136	0.440354	0.2408	0.535432	0.571864	0.626515	0.313041	0.537628	0.644153	0.553195	0.6979	1.01015	0.756022	0.753424	0.777112	0.819165	NaN	0.697674	1.30869	0.603677	0.578759	0.802621	0.523908	0.992734	0.783614	0.791197	0.729572	0.690497	1.06086	0.738036	0.697797	0.794784	0.782583	0.677722	0.508131	0.529918	1.04191	0.684921
4	20.2	3	1	0.62102	0.594533	1.02151	0.844542	1.04502	0.92679	1.51157	1.35061	1.45947	1.05314	1.33013	1.31783	1.53485	1.36544	1.40476	1.15909	1.61579	1.13135	1.3202	1.27859	1.1378	1.06187	0.99242	1.16345	NaN	1.73033	1.05044	1.38999	1.40667	1.17727	0.661145	0.738318	0.824015	1.13797	0.920676	1.17262	0.943603	0.923766	0.938275	1.06547	1.20874	0.955643	1.13784	0.750412	1.2936	0.9019
4	20.525	2	1	0.753237	0.84999	1.00373	1.45607	0.92955	1.14995	0.585245	0.429644	0.289526	0.863187	1.22083	1.28957	0.505427	0.726484	0.593247	0.68177	0.457502	0.624804	0.469126	0.603607	0.627407	0.596	0.603221	0.650174	NaN	0.886423	1.21755	0.537401	1.34742	0.974729	0.934489	0.708846	0.554661	0.84247	0.801262	1.11393	0.617558	0.710164	0.589173	0.704984	0.49011	0.607561	0.523208	0.610121	0.223599	0.398167
4	21.125	2	1	0.415663	0.478127	0.633188	0.32463	0.675039	0.936379	0.72962	0.48404	0.385963	0.479105	1.08888	0.741617	0.533201	0.751719	0.329214	0.288394	0.366142	0.373094	0.582163	0.230812	0.590657	0.448654	0.63747	0.489991	NaN	0.386174	1.48991	0.608753	0.447423	1.34503	0.349851	0.35453	0.52331	0.418223	0.593564	0.736454	0.731368	0.366289	0.931178	0.932366	0.703821	0.452132	0.711769	0.745107	0.974747	0.845718
4	23.25	1	1	1.12855	0.855553	0.836585	1.07008	1.22689	1.48957	0.631423	0.949312	1.12863	0.992834	0.802612	0.989233	0.836454	0.754877	0.584724	0.772144	0.7494	1.00498	1.39256	1.24537	1.02816	0.929704	0.894775	0.963561	NaN	0.688868	0.431715	0.817445	1.38277	0.87944	0.891003	0.664974	0.963913	0.862301	0.939999	0.727964	1.17159	1.12439	1.06208	0.764571	1.36157	1.1347	0.959961	0.950558	1.25411	1.64605
4	23.7	1	1	1.14	1.14191	1.02952	1.54877	0.742888	0.880098	0.541783	1.0044	1.07407	0.882885	1.50064	1.38866	1.22863	1.10046	0.564317	0.747152	0.619752	0.762076	0.711822	1.09025	0.595679	0.542176	0.714207	1.03274	NaN	0.76203	0.386173	1.08765	1.5249	1.64738	0.843044	0.904464	0.885934	0.954753	0.824398	1.26608	0.496141	0.719346	0.593778	0.755697	1.09913	1.31414	1.05564	0.88392	0.957209	0.637883
5	1.55	4.05	0	0.792794	0.468934	0.737055	0.649793	1.23774	0.602347	0.658023	0.222929	0.536004	0.227457	0.222385	0.334123	0.540773	0.318651	0.223587	0.285293	0.696905	0.358004	0.816196	0.432691	0.480853	0.263972	0.542989	0.528313	NaN	0.74977	0.603066	0.822933	0.797623	0.499076	0.642513	0.668945	0.454219	0.593943	0.535412	0.600407	0.51613	0.493768	1.2771	1.04063	0.622428	0.348091	0.637367	0.604988	0.372366	0.240244
5	1.775	1.5	0	1.09612	0.53779	0.717742	0.975034	1.20575	1.265	0.749972	0.381158	1.11045	0.901525	0.332746	0.491931	0.715494	0.621603	0.326449	0.275756	0.548358	0.579298	0.442919	0.509608	0.80295	0.557431	0.763695	0.740282	NaN	0.735908	0.596603	0.721296	0.736938	0.84085	0.900729	0.75196	0.901621	0.777354	0.661616	0.680775	0.679457	0.353806	0.842728	0.663688	0.797172	0.417938	0.749637	0.85112	0.430976	0.430554
5	2.6	3	0	0.754829	0.855135	0.378305	0.600058	0.790474	1.0558	0.608665	0.879205	0.869772	0.554726	0.610763	0.34826	0.658544	0.540693	0.452714	0.282436	0.860286	0.943133	0.818071	0.803335	0.710687	0.808868	0.608388	0.654109	NaN	0.692478	0.42471	0.598772	0.931972	0.484068	0.341746	0.352732	0.636718	0.534571	0.46617	0.412774	0.471196	0.475941	0.601974	0.638275	0.603558	1.06504	0.791265	0.763304	1.1018	0.388996
5	3.2	8	0	0.811781	0.588027	0.673307	0.303455	0.425503	0.686017	0.793743	1.22583	0.552084	0.918056	0.285789	0.384902	1.02531	0.875232	0.671267	0.697615	0.78182	0.775703	1.39225	1.14481	0.902622	0.853167	0.858799	0.776086	NaN	0.442675	0.633626	0.772859	0.709116	0.974314	0.457454	0.421429	0.889405	0.662106	0.620824	0.691709	0.608486	0.436516	0.724136	0.720511	0.717164	1.13066	0.946119	0.727673	0.728244	0.7224
5	4.875	5	0	0.947475	1.21029	0.704379	1.00518	0.945573	0.787989	1.15392	0.653262	0.410675	1.34955	0.559805	0.472303	0.321182	0.533916	0.247053	0.407766	0.77389	0.925696	0.933807	1.15608	0.983881	1.07261	1.30137	0.973184	NaN	0.0830796	0.816434	1.1384	0.388329	0.476026	1.04692	0.701327	0.748139	0.973919	0.930134	1.27404	0.746696	1.26631	1.15467	1.49548	0.502796	0.81676	0.711645	1.05898	0.372214	0.93339
5	5.6	3	0	0.796377	0.556003	0.44187	0.794231	0.90808	0.589925	0.40997	0.37644	0.878084	0.828106	0.126776	0.222026	0.148416	0.200638	0.131773	0.416882	0.460361	0.478679	0.648516	0.670559	0.53961	0.348541	0.54235	0.531006	NaN	0.179846	0.618952	0.861496	0.1836	0.204682	0.702389	0.649846	0.994409	0.96128	0.788606	0.552617	0.521781	0.558301	0.898008	0.553656	0.701636	0.687365	0.462301	0.457367	0.604339	0.571035
5	6.45	1.5	0	1.33601	0.721878	0.981394	0.924233	1.10046	0.694839	1.13072	0.425777	0.986187	1.44401	0.675318	1.08324	0.644664	0.611201	0.538091	0.919759	0.669917	0.871742	1.16043	1.40005	0.954188	0.598185	1.22725	1.25073	NaN	0.441378	0.991769	1.55226	0.845525	1.16661	1.43724	0.831499	0.949543	1.31742	1.21112	1.0619	0.993956	0.792865	1.19883	1.10287	1.10966	0.852253	0.763869	0.875923	1.22892	1.11557
5	10	0.75	0	0.783882	1.1354	0.521708	1.06308	0.787257	0.938184	0.343515	0.230146	0.108543	0.208677	0.494585	0.214763	0.315727	0.228273	0.507455	0.105432	0.604296	0.41789	0.330043	0.413724	0.588595	0.466224	0.38361	0.449759	NaN	1.36648	0.731959	0.569125	0.734328	0.621817	0.366779	0.83994	0.518525	0.373765	0.480954	0.466012	0.423735	0.579084	0.620862	0.384574	0.530666	0.34539	0.545875	0.38228	0.0946382	0.642236
5	10.2	2.25	1	0.694232	1.05991	0.339395	0.53229	0.565474	0.970096	0.515907	0.16543	0.188747	0.154964	0.409125	0.176432	0.543061	0.290938	0.322796	0.112576	0.614102	0.696579	0.6438	0.639649	0.705854	0.569902	0.357599	0.374964	NaN	1.09602	0.487086	0.505897	0.536698	0.554149	0.39729	0.872026	0.844412	0.369187	0.567618	0.71334	0.798822	0.6967	0.663863	0.887855	0.550244	0.829494	0.593591	0.371255	0.479314	0.643611
5	10.75	2	1	0.411952	0.724619	0.511863	0.516089	0.276813	0.36344	0.674727	1.03413	0.829949	0.411059	1.07147	0.617591	1.06058	0.781219	0.923351	0.761608	1.10231	1.0592	0.892433	1.08382	0.879503	0.772475	0.789621	0.763914	NaN	0.304429	0.909538	0.940451	0.395957	0.637913	0.644673	0.740257	0.820705	0.589248	0.752903	0.822939	0.483982	0.871346	0.770476	0.862304	0.420827	0.733502	0.869881	0.689803	0.465822	0.694822
5	11.425	2	0	0.694465	0.695612	0.300578	0.405625	0.71909	0.8775	0.345198	0.676493	0.735594	0.535635	0.634382	0.376323	0.720151	0.586978	0.477172	0.353545	0.771734	1.07513	0.767893	1.15015	0.761913	0.577618	0.660982	0.619652	NaN	0.400178	0.794043	1.36455	0.377303	0.610074	0.396046	0.393916	0.744337	0.771786	0.513206	0.516888	0.227082	0.274324	0.792594	1.16261	0.673234	0.913343	0.94055	0.699896	0.821545	0.520474
5	12.825	1	1	0.748215	0.71114	0.783738	0.807651	1.29477	0.894414	0.680584	0.654106	0.248136	0.699548	0.23364	0.789165	0.255825	0.674544	0.310544	0.658659	0.612821	0.803986	0.991034	0.663624	0.478009	0.804833	0.687857	0.767038	NaN	0.283081	1.04689	0.904806	0.519219	0.871182	0.815383	0.542419	0.913355	0.886067	0.83085	1.02829	0.368504	0.456023	0.969313	0.959649	0.716078	0.96815	0.700992	1.06476	1.02031	0.903995
5	14.15	9	1	0.477442	0.567268	0.499245	0.547584	0.773805	0.820824	0.528057	0.606883	0.442123	0.752296	0.201054	0.552019	0.451644	0.446649	0.429347	0.403751	0.751559	0.650946	0.684402	0.810192	0.533297	0.742511	0.536075	0.379948	NaN	0.271455	0.67199	0.355339	0.489536	0.366301	0.299366	0.329771	0.591549	0.982383	0.686786	0.77624	0.332343	0.455899	0.761922	0.738602	0.203113	0.293194	0.598416	0.692493	0.511708	0.759286
5	15.025	1.5	1	0.707846	0.342687	0.458331	0.662245	0.591944	0.288938	0.222902	0.240791	0.358054	0.227247	0.0791437	0.147569	0.210466	0.279088	0.196782	0.18088	0.325037	0.243411	0.44137	0.30839	0.353807	0.360317	0.34764	0.216843	NaN	0.133875	0.666933	0.142895	0.168012	0.175825	0.215823	0.18436	0.162779	0.224086	0.160992	0.243214	0.283842	0.461986	0.471006	0.226894	0.617288	0.452594	0.295436	0.17054	0.623139	0.209287
5	15.75	2	1	1.19556	1.0188	1.3498	0.915415	1.00053	0.901883	0.288752	0.233958	0.248923	0.29059	0.0515462	0.206412	0.214107	0.291966	0.117477	0.430346	0.308241	0.284914	0.295517	0.560669	0.436108	0.525489	0.363156	0.32636	NaN	0.0968375	0.372602	0.283533	0.320318	0.524182	0.74714	0.410999	0.350268	0.388544	0.368849	0.290826	0.563946	0.751082	0.692163	0.576317	0.844277	0.623437	0.529756	0.308031	1.38027	0.905386
5	16.55	3	1	0.998788	0.644671	0.730771	0.603145	1.08732	0.896681	0.430952	0.383723	0.760997	0.235734	0.186824	0.238491	0.315966	0.574127	0.511873	0.486656	0.520163	0.440798	0.393236	0.874256	0.810405	0.655449	0.828993	0.70909	NaN	0.175807	0.466708	0.461726	0.37775	0.694571	0.640408	0.37982	0.173043	0.482078	0.188719	0.350254	0.44607	0.698769	0.720151	0.635845	0.88401	0.805121	0.517731	0.424434	0.487799	0.656521
5	17.175	2	1	1.06777	1.25808	0.774439	1.02249	0.806058	0.625126	0.381477	0.623506	0.548578	0.495663	0.303384	0.377068	0.235226	0.44955	0.159676	0.662018	0.201952	0.368325	0.637187	0.479144	0.450943	0.372984	0.688518	0.602954	NaN	0.70506	0.537728	0.962146	0.815401	0.54274	0.415964	0.936711	0.69403	0.644732	0.774729	0.490208	0.997569	0.947601	1.22884	0.731003	0.752086	1.05509	0.935211	0.585842	0.911779	0.775929
5	19.5	1	1	0.725206	1.05998	0.871394	0.752575	1.17538	0.892726	0.648472	0.43194	0.717291	1.01118	0.153325	0.596374	0.487064	0.860492	0.608938	0.577495	0.786226	1.08887	0.937911	0.534223	0.826383	0.963141	0.749573	0.615986	NaN	0.987261	1.05703	1.0759	0.640292	1.08893	0.996541	0.4266	0.777642	0.811063	0.896721	0.645015	1.02169	0.902645	0.646569	0.93834	0.535773	0.645842	0.751061	0.580719	0.425174	0.847421
5	19.65	1.5	1	1.07203	1.15109	1.33998	0.845349	1.34107	1.46279	1.01947	1.27784	1.23526	1.83487	1.43032	1.12813	1.08815	1.4312	1.36926	1.06168	1.23537	1.5238	1.16374	1.43176	0.994865	1.16884	1.02008	1.20558	NaN	1.48607	0.946638	1.657	0.981077	1.36583	1.54045	1.30356	1.34754	1.12579	1.14156	1.32604	1.25274	1.25014	0.981942	1.64901	1.31012	1.4875	0.705904	1.00019	0.671097	1.43708
5	20.2	1	1	0.687875	0.498598	0.610414	0.498488	0.954756	0.861702	1.1709	0.914284	0.69777	0.791937	0.362336	1.32567	1.26599	1.38789	0.851483	0.97844	0.826719	1.07049	1.35241	0.878188	0.831636	1.2866	1.02885	1.09029	NaN	1.69996	1.57481	1.26265	1.02065	1.67674	1.19688	0.928438	1.28985	1.08721	1.08132	1.21662	0.919068	0.839916	0.783233	1.24314	0.564693	0.868382	0.834176	1.08976	0.723503	1.35946
5	20.525	2	1	1.45771	1.38907	1.53888	1.34412	0.734617	1.16806	0.833547	1.5485	1.33065	1.52055	1.25712	0.981254	1.0418	1.10728	1.20001	0.65562	1.19263	1.12181	0.874087	0.966961	1.25929	1.14797	1.38352	1.61859	NaN	1.25768	1.16054	1.74733	0.517341	1.29063	1.7268	1.60102	1.4321	1.48097	1.47381	1.70326	1.25008	1.51765	1.00589	1.586	0.870269	1.24428	1.18709	1.47096	1.34385	1.35832
5	21.125	3	1	1.35398	1.3078	1.10762	1.15096	1.68465	1.62604	1.4499	1.21919	1.38591	1.20299	1.56518	1.19966	1.32058	1.36196	1.28077	1.24821	1.26811	1.57733	1.22589	1.28778	1.38408	1.37701	1.48727	1.37986	NaN	1.81432	1.42777	1.23888	1.2998	0.881576	1.79655	1.50836	0.797433	1.45835	1.08863	1.52909	1.35275	1.56274	1.28778	1.42235	1.16996	0.853352	1.12972	1.12943	1.55722	1.32951
5	23.25	1.5	1	0.833702	0.789523	0.901827	0.475421	0.899909	0.760603	0.315983	0.522014	0.635938	0.273825	0.125226	0.356089	0.422429	0.71058	0.290401	0.439038	0.379613	0.448096	0.672615	0.415548	0.752693	0.803498	0.717154	0.423043	NaN	0.359805	0.319682	0.499127	0.273724	0.593753	0.446173	0.35731	0.554991	0.362419	0.634096	0.368547	0.636019	0.552938	1.01436	0.907423	0.912095	0.760577	0.42948	0.418793	0.334519	0.405969
5	23.7	0.666667	1	0.261731	0.267259	0.633008	0.266995	0.339212	0.453797	0.224985	0.414774	0.21654	0.248992	0.0854116	0.136278	0.218586	0.260166	0.160411	0.225412	0.231262	0.168325	0.394881	0.245253	0.376822	0.217855	0.386249	0.174061	NaN	0.192327	0.562526	0.379371	0.206612	0.339019	0.14653	0.174384	0.263237	0.279106	0.362482	0.410005	0.233888	0.185141	0.734478	0.371708	0.45765	0.397973	0.460075	0.274894	0.25064	0.233877
6	1.55	4	1	0.674472	0.801848	0.378053	0.45592	0.812931	0.386931	0.330174	0.695376	0.32578	0.579366	0.389907	0.245093	0.471433	0.737808	0.546255	0.166505	0.564144	0.121678	0.287542	0.38272	0.466615	0.260577	0.539818	0.436721	1.36462	0.321076	0.482747	0.609363	0.0836455	0.150524	1.30204	0.924702	0.381869	0.641428	0.423945	0.413463	0.805769	0.970302	0.262747	0.283467	0.741685	0.459611	0.2284	0.524852	0.372533	0.262534
6	1.775	3.5	0	0.548692	0.655369	0.426086	0.52115	0.829874	0.325264	0.576567	1.12376	0.523957	1.18376	0.528001	0.241508	0.641614	0.731773	1.0235	0.351089	0.675508	0.192351	0.556049	0.682337	0.655256	0.363262	0.923236	0.651909	1.389	0.234942	0.702385	0.414379	0.253593	0.342651	0.681351	0.697917	0.457842	0.655393	0.500112	0.572829	0.534194	0.574906	0.802755	0.612727	0.53683	0.432106	0.343553	0.573181	0.779681	0.286045
6	2.6	15	1	0.814701	0.597764	0.408121	0.447313	0.576992	1.07321	0.493668	0.44757	0.556974	0.433272	1.133	1.23203	0.788673	0.763154	0.635436	0.916918	0.603286	0.561765	1.06728	1.12282	1.03131	0.910685	0.803537	0.823695	1.00639	0.149276	1.08342	1.16579	1.21289	0.821512	0.620028	0.50407	0.54415	0.439815	0.36026	0.595629	0.543724	0.548099	0.387027	0.510075	0.765825	0.673421	0.456157	0.655884	0.789988	0.263618
6	3.2	8	0	0.446329	0.47577	0.289965	0.167494	0.855494	0.628369	0.361207	0.243661	0.136139	0.327449	0.775146	0.84648	0.4659	0.240324	0.188108	0.178198	0.30652	0.274879	0.313193	0.400462	0.448554	0.40784	0.576954	0.463754	0.153649	0.304542	0.263103	0.321304	0.500512	0.183954	0.484026	0.352996	0.339098	0.218518	0.200296	0.353486	0.369232	0.414078	0.260034	0.358903	0.414298	0.358465	0.286401	0.295118	0.320691	0.412864
6	4.875	4	0	0.965789	0.941433	0.679771	1.25421	1.51009	1.51031	0.939169	1.09485	0.835505	0.853129	0.834651	0.523679	0.964198	0.716082	0.505348	0.566122	0.620079	0.518447	1.01146	0.587996	0.785877	0.984358	0.892784	0.951045	0.631213	1.01684	0.732952	0.951227	0.733035	0.653803	1.22721	1.2991	0.917389	1.02696	1.07109	1.19955	1.1772	1.215	0.936438	1.04703	1.25299	0.930792	0.735932	0.36499	0.860126	1.30242
6	5.6	4	0	1.05617	0.792444	1.45114	1.19933	1.0155	1.03181	1.37068	1.36221	1.53606	1.42786	1.30813	0.896249	1.33716	1.31214	1.02685	1.34088	1.54958	1.83485	1.2601	1.36834	1.23538	1.69499	1.2583	1.23658	1.39951	1.71281	1.01048	1.41518	1.00121	0.70056	1.06208	1.47495	1.54779	1.49717	1.43028	1.62476	1.11078	1.22899	1.1532	1.51281	1.22264	1.38172	1.56353	1.60793	1.57726	1.70525
6	6.45	5	0	0.73728	0.751599	1.06958	0.688239	0.646732	0.550211	0.422621	0.710011	0.718065	0.375349	0.937606	1.22789	0.609522	0.912206	0.491397	1.11561	1.0346	1.40627	0.59718	1.02582	0.684994	1.11231	0.806365	0.965042	0.933499	1.08295	0.893931	1.10679	0.720957	1.09877	0.724836	0.846755	0.673317	0.804589	0.532131	0.453307	0.438663	0.593075	0.663814	0.92138	0.662812	1.11499	1.05412	1.33742	1.23287	1.17613
6	10	1	0	1.08557	1.17438	1.32415	1.05687	1.31679	1.25424	1.05276	0.595385	0.910361	0.766997	1.05962	1.01627	1.0106	0.67065	0.395891	0.239701	0.67291	0.507646	0.821731	0.854258	0.995198	0.855478	1.04888	0.910669	0.940604	0.606107	0.79836	0.921702	0.909057	0.790745	1.14425	0.990641	0.893539	1.23204	1.18524	1.1756	1.11163	0.95891	1.2766	1.22985	1.18232	1.08793	1.34809	1.01918	1.58856	1.39104
6	10.2	3	1	0.70027	0.98258	1.09501	0.944427	1.41371	1.02241	1.18292	0.538376	0.77643	0.687133	0.790027	0.479568	0.711176	0.427818	0.463833	0.143931	0.481314	0.187249	0.718426	0.805969	0.602503	0.425688	0.579473	0.492774	0.685964	0.282646	0.68757	0.585222	0.856321	0.353593	0.860475	0.548747	0.755642	0.553109	0.758788	0.690586	1.04742	0.911578	0.994989	0.673453	0.786286	0.71683	0.725331	0.552815	0.818022	1.21348
6	10.75	4	1	1.04538	0.866931	1.51801	1.16612	0.673307	0.533628	1.08746	0.883377	1.44459	1.51629	1.30532	0.886019	1.02298	0.849195	0.601949	0.317778	0.429342	1.03779	0.741468	1.15203	0.656947	0.732834	1.04085	0.854343	1.41931	0.973947	0.589977	0.761562	1.59707	1.28417	1.23631	1.36448	0.774992	0.703001	1.00363	0.947166	0.95933	0.761846	1.11871	0.666067	0.833363	0.796342	1.22713	0.810637	0.633199	0.816961
6	11.425	4	1	0.938167	1.16027	1.02858	1.19647	0.556671	0.550708	1.31301	0.507172	0.836887	0.921795	1.44394	0.727175	0.744499	0.535111	0.668824	0.480117	0.555965	0.763447	0.550691	0.524074	1.00603	0.797199	0.787185	0.561818	0.674945	0.554274	0.53298	0.622277	1.14304	0.950413	0.93276	0.944828	0.59092	0.787881	0.576748	0.981151	0.787262	0.75109	0.788227	0.767008	0.985604	0.669568	0.96199	0.860045	0.688525	0.992165
6	12.825	3	1	0.962324	1.10906	1.07973	1.10002	0.931071	0.909481	0.707293	0.751428	0.264653	0.586574	1.24262	1.32472	1.09233	0.980644	0.856439	1.00446	1.39752	1.2884	1.37435	1.01764	1.32776	1.33758	1.09949	1.24226	0.321896	1.11077	0.982174	0.752297	1.50148	0.925324	1.12008	0.522077	0.936833	1.05668	0.78335	0.764618	0.701366	0.739271	0.724873	1.35559	0.777383	0.968823	1.04892	0.956188	1.18091	1.13855
6	14.15	6	1	0.468642	0.511969	0.504361	0.511156	0.638463	0.405992	0.217431	0.300104	0.208449	0.46927	0.292748	0.537681	0.514074	0.536846	0.251458	0.413182	0.391198	1.04246	0.339961	0.812823	0.193355	0.748405	0.380373	0.524525	0.259477	0.31348	0.388973	0.451339	0.363062	0.707942	0.819422	0.39833	0.529549	0.61266	0.533172	0.681698	0.48525	0.542279	0.464465	0.638965	0.243204	0.361047	0.377608	0.473009	0.712665	0.638137
6	15.025	2	0	0.610111	0.720132	0.349731	0.554926	0.63743	0.722296	0.20312	0.227401	0.410647	0.247307	0.209127	0.434164	0.354686	0.411559	0.445508	0.216527	0.203509	0.468582	0.430732	0.491348	0.489627	0.389864	0.290783	0.310968	0.275237	0.491609	0.641153	0.73086	0.472117	0.424582	0.735111	0.367921	0.356357	0.307379	0.402302	0.423689	0.511019	0.542533	0.600196	0.473328	0.539889	0.786563	0.41279	0.452437	0.632685	0.490304
6	15.75	3	1	1.14211	1.34564	0.920003	0.739345	1.34286	1.11025	0.211751	0.485814	0.599378	0.679959	0.628395	0.712277	0.577029	0.570111	0.400163	0.422344	0.77018	0.951624	0.783646	1.06807	0.669457	0.772047	0.498025	0.658564	0.969707	1.10226	0.220056	1.05283	0.366203	0.738661	0.740949	0.703299	0.486556	0.784625	0.782249	0.66917	0.6953	1.13491	0.707014	1.03775	0.726935	1.30028	0.633601	0.432954	0.631872	0.657781
6	16.55	2	0	1.09626	0.983241	0.702281	0.963823	0.526329	0.902211	1.03865	1.33023	1.07993	1.11614	0.808528	0.737542	0.911951	1.21177	1.12957	0.911382	0.883886	0.865166	0.711287	0.99626	0.754711	0.990572	1.1597	1.23799	1.67682	1.37669	1.34027	1.13017	1.24631	1.05203	0.921073	1.06184	1.16651	1.50775	0.802991	1.30486	1.03836	1.27271	0.809927	1.04576	1.06199	1.36894	0.811774	1.12029	0.462636	0.896744
6	17.175	1.5	0	0.875848	1.19415	0.619153	0.980793	0.865584	0.902826	0.591817	0.583115	1.30505	0.406423	0.442917	0.643692	0.391626	0.287595	0.331114	0.100542	0.348784	0.144481	1.03593	0.971576	0.434693	0.548028	0.542953	0.594329	0.199488	0.358384	0.342712	0.456795	0.649858	0.256491	0.921283	0.707626	0.377973	0.688229	0.292938	0.525519	0.896548	0.954684	0.493297	0.702012	1.21094	0.863494	0.42929	0.413537	0.589896	0.897288
6	19.5	3	1	1.05408	1.12307	0.910884	0.867155	1.50021	1.35032	0.703522	0.557879	0.513706	0.650641	0.547636	1.01889	1.24181	1.01777	0.543074	0.617623	0.622476	0.555117	0.935111	1.0133	0.872148	1.12982	0.907581	0.880122	0.910123	1.48081	0.837272	0.975916	0.706378	0.750153	0.871129	0.913952	0.79094	0.587922	0.548645	0.27576	0.673972	1.00411	0.79801	0.609695	1.07491	1.16737	0.547446	0.370051	0.52183	0.583155
6	19.65	1	1	0.88176	1.12525	1.22707	1.08426	1.15855	1.1176	1.12346	0.481753	1.50075	0.753107	0.627544	0.887438	1.24591	1.0135	1.11022	0.37313	1.01284	0.479118	1.52519	1.09163	0.984933	1.14259	1.03815	0.947198	0.796793	0.443195	0.982554	0.919731	1.18456	0.576509	1.25268	1.29131	0.981953	0.841475	0.954136	0.617865	0.75544	0.691331	1.02658	1.21017	1.05774	1.10234	1.06354	0.686532	1.1427	0.693476
6	20.2	1	0	0.964519	1.07627	1.30506	1.64023	0.875698	1.1054	1.45914	1.53332	1.45077	1.49957	1.02314	0.786087	1.36182	1.05801	1.25926	1.27949	0.445944	1.43471	1.18073	0.825803	0.97848	0.784555	1.09508	1.26186	1.40455	1.49526	1.33951	1.55045	0.975077	0.772662	0.876891	1.37253	1.27999	1.18295	1.05091	0.910887	1.3799	1.12012	1.004	1.16377	1.4031	1.46447	1.11003	0.853653	0.696748	0.923313
6	20.525	1.5	1	0.854276	1.02141	1.09532	1.38767	1.05618	1.57962	1.33756	1.13151	1.30661	1.01003	0.26868	0.37418	0.578945	0.944994	0.56402	0.6023	0.595066	0.600323	0.946218	0.63425	1.06501	0.878722	0.923401	0.955824	0.694881	1.31277	1.33712	1.38044	0.652311	0.699792	0.516852	1.29507	0.711909	0.95405	0.511092	0.683886	1.08264	0.760693	0.814158	0.726193	0.815834	0.649629	0.976198	0.882764	1.01275	0.843119
6	21.125	5	1	1.1082	1.16246	1.16134	1.24421	1.04491	1.17228	1.11972	1.21894	0.58851	1.34371	0.75143	1.20717	1.32597	1.34598	1.59941	1.45128	0.804574	1.69747	1.29216	0.716096	0.891937	0.783609	1.14918	1.18024	0.799455	0.760308	1.52376	1.14126	1.44565	1.38212	1.17209	1.29087	1.29545	1.22472	1.32715	1.3801	1.66785	1.41567	1.42291	1.51837	1.32374	1.44503	1.03028	1.07976	1.32104	0.981956
6	23.25	1.5	1	0.431333	0.605554	0.152859	0.605569	0.599111	0.688696	0.508479	0.259075	0.377828	0.729824	0.936494	0.588002	0.777329	0.548423	0.422409	0.260057	0.515294	0.32457	0.626193	0.873492	0.517606	0.545478	0.43954	0.496048	0.558338	0.133938	0.623265	0.192318	0.757547	0.582326	1.16512	1.10724	0.638717	0.666128	0.912332	0.645492	0.544914	0.59412	0.929072	0.771473	0.72465	0.68405	0.851804	0.714288	0.528777	1.07774
6	23.7	2	1	0.721812	1.01073	0.582333	0.991912	0.371517	0.36914	0.486953	0.278092	0.222629	0.588131	0.272621	0.340991	0.858535	0.730698	0.326302	0.499073	0.302051	0.393059	0.365536	0.717336	0.549107	0.820161	0.522384	0.691887	0.399905	0.514335	0.414531	0.547094	0.611304	0.82694	0.454766	0.74082	0.278539	0.65797	0.186842	0.895934	0.427687	0.688637	0.412379	0.635671	0.4282	0.547861	0.326821	0.635279	0.257477	0.470825
7	1.55	1	1	0.654422	0.646285	0.428777	0.650907	0.928458	0.818703	0.343033	0.567709	0.546011	0.699878	0.143831	0.217932	0.3803	0.458913	0.477273	0.331481	0.775887	0.576611	0.749277	0.642561	0.579249	0.51366	0.584752	0.542848	NaN	NaN	0.337996	0.666165	0.206337	0.22438	0.201218	0.459448	0.45892	0.626937	0.535088	0.584697	0.360627	0.327716	0.727502	0.649329	0.663978	0.628253	0.511977	0.438228	0.336931	0.19999
7	1.775	3	0	1.3813	1.2356	0.935158	0.77152	1.38997	1.22712	0.680248	1.00391	0.604461	0.716093	0.433971	0.549437	0.531146	0.505483	0.689539	0.782319	0.585053	0.932908	1.55183	1.26245	1.3512	1.25559	1.35791	1.35	NaN	NaN	0.799595	1.28794	0.83494	0.579159	0.479659	0.788344	0.844622	0.963119	0.66261	0.591184	0.962497	0.85045	0.975414	1.03465	1.2497	0.881535	0.739446	0.619022	0.690449	1.06808
7	2.6	3	0	1.30996	1.15765	1.49333	1.42968	1.43967	1.53514	0.851956	0.923184	0.831199	1.19275	0.86549	1.19403	0.773658	0.902754	0.46548	0.581035	1.41954	0.859134	1.26174	0.883643	0.998602	0.962589	1.07793	0.9632	NaN	NaN	0.664188	1.3563	0.751316	0.948852	1.10461	0.951459	1.0832	1.1353	0.985664	1.04855	0.808587	1.22209	1.17757	1.42261	1.336	1.44249	0.969597	0.729753	1.32547	0.831773
7	3.2	4	1	0.522912	0.648912	0.46369	0.324979	0.89288	0.789819	0.480442	0.76798	1.11445	0.654788	0.416511	0.372185	0.861319	0.479072	1.21821	0.75648	1.14745	0.342677	0.771904	0.432324	0.91853	0.654628	0.958301	0.551756	NaN	NaN	0.944452	0.949502	0.246998	0.112635	0.717536	0.776345	0.611081	0.485077	0.26961	0.49018	0.904772	1.0079	0.686966	0.740687	0.59194	0.860376	0.564844	0.387179	1.43573	0.527574
7	4.875	4	0	1.19857	1.19572	0.850134	1.09091	1.36391	1.16263	0.538359	0.894327	0.947296	0.793287	0.650597	1.17606	0.998877	1.27299	1.31764	1.6777	1.19451	1.77268	1.34088	1.50857	1.11103	1.47557	1.3585	1.40234	NaN	NaN	1.4068	0.708497	1.24192	1.49447	1.2243	0.967667	1.20172	1.21413	1.279	1.11024	1.41251	1.44161	1.11691	1.01374	1.20705	1.55338	1.0153	0.921414	0.802987	0.579164
7	5.6	6	0	1.30982	1.20721	0.934567	0.946178	0.953239	0.974093	0.951171	1.16376	1.07596	0.923258	0.625027	0.669397	1.16737	0.931448	0.948765	0.801498	0.630278	0.841854	1.11243	1.0022	0.95336	0.744834	1.14297	0.968335	NaN	NaN	0.896115	0.994664	1.12857	1.0599	0.592791	0.828973	0.946328	0.993574	0.774888	1.23719	1.17607	1.25353	0.906525	0.763653	1.20927	0.738472	1.09812	0.908339	0.629829	1.00322
7	6.45	2	0	0.483646	0.486667	0.92943	0.565114	1.0849	0.834643	1.32796	1.12674	1.10443	1.04856	1.25285	1.59144	0.960867	0.666977	1.16278	1.18677	1.32443	1.32897	1.15312	0.710305	1.04566	0.936448	1.22449	1.23837	NaN	NaN	0.703621	0.59993	1.45014	1.14739	0.724515	0.990497	0.747103	0.774573	0.733518	0.684739	0.662276	0.486147	0.691759	0.663726	0.618436	0.438949	1.10961	1.18848	1.13012	0.974758
7	10	1	0	0.571261	0.60704	0.883321	0.972727	0.802532	0.648334	1.19295	1.03726	1.05394	1.0324	1.10168	0.838289	0.814802	0.743969	1.05366	0.80884	0.8487	0.870856	0.824437	0.679704	0.624843	0.709295	0.799156	0.90725	NaN	NaN	0.680827	0.86255	0.901922	0.981535	0.880939	0.788399	0.759342	0.860913	0.514584	0.737357	0.602228	0.710377	0.452346	0.758556	0.476257	0.756598	0.87981	0.767524	0.612384	0.876084
7	10.2	3	1	1.22369	1.00585	1.22876	1.11554	1.4139	1.29072	0.996215	1.23575	0.790565	1.24956	0.605694	0.918514	0.648739	0.932824	0.923656	1.22871	1.41795	0.935315	0.775343	0.895325	0.882877	0.898118	1.03459	0.876405	NaN	NaN	1.33542	1.41163	1.04564	0.596391	0.725515	0.86526	1.13895	0.82706	0.836723	1.19803	0.576057	0.840257	1.04684	0.947491	0.927568	0.918053	1.14504	0.981158	0.862586	0.59753
7	10.75	3	1	0.762736	0.949212	0.694104	0.885275	1.09875	0.73557	0.576619	0.829927	0.445614	1.03128	0.406503	0.395961	0.814202	0.383316	0.153828	0.397774	0.348002	0.198168	0.454201	0.730271	0.381562	0.40385	0.524333	0.402259	NaN	NaN	0.589867	0.631866	0.541826	0.521737	0.684779	0.704736	0.511203	0.602341	0.752943	0.815374	0.679646	0.751265	0.777803	0.737077	0.640957	0.819487	0.472021	0.288549	0.430485	0.841416
7	11.425	2	0	0.98758	0.613557	1.07939	1.19788	1.01437	0.669039	0.752577	0.462004	0.923307	0.844984	0.62177	0.339811	0.870336	0.571577	0.44419	0.306751	0.97122	0.452299	1.17415	0.788644	0.935186	0.751016	0.836168	0.494171	NaN	NaN	1.04476	0.80723	0.755646	1.02871	0.515735	0.469503	1.02063	1.09269	1.24648	1.32082	0.514719	0.535654	0.798124	0.897525	1.1678	1.20039	0.642711	0.404118	1.01077	0.876543
7	12.825	3	0	0.853943	0.915977	1.15965	0.910472	0.712261	0.700249	0.470771	0.631759	0.915168	0.602503	0.330337	0.697134	0.79052	0.898089	0.348686	1.23218	1.11557	1.15619	0.623124	0.652309	0.95654	1.09355	0.824405	0.924047	NaN	NaN	0.72352	0.816525	0.823137	0.678148	0.859365	0.889003	0.850674	0.740599	0.650381	0.707288	0.611071	0.486948	0.753731	0.690681	0.529986	0.648136	1.08078	1.18237	0.806703	0.922201
7	14.15	4	0	0.720732	0.839953	1.04875	0.621361	1.07495	0.506137	0.722572	0.799293	1.15074	0.457038	0.780741	0.608984	0.980842	0.729271	0.731534	0.348382	1.22983	0.995413	0.680802	0.326199	0.747368	0.60962	0.840654	0.795225	NaN	NaN	0.630276	0.811083	1.21508	0.973388	0.699891	0.72473	1.20647	0.923288	0.976077	1.11043	0.712966	0.669153	0.966101	1.03986	0.613424	0.633292	0.94902	0.825697	0.70751	0.496779
7	15.025	5	1	1.26751	1.17427	1.09304	1.19048	1.09334	1.19866	1.27203	0.852759	0.567789	0.892775	0.9207	0.811477	0.839158	0.873207	0.467764	0.469259	0.783565	1.06077	0.945902	1.07341	0.934641	1.01507	1.08333	0.83129	NaN	NaN	1.35688	1.48958	1.30018	1.04919	1.1055	1.00769	1.16455	1.06218	0.883422	0.96397	1.10898	1.0115	0.74157	0.691513	1.27427	1.14994	0.906894	1.06372	0.491577	0.7463
7	15.75	4	0	1.01853	1.22021	0.791606	1.28062	1.30821	1.59945	0.855174	0.585977	0.699377	1.07189	0.995392	0.511734	0.794685	0.624074	0.51265	0.447981	0.570291	0.627009	1.00601	0.336285	0.770194	0.54425	0.865524	0.924069	NaN	NaN	1.19713	0.830315	0.846973	0.76695	0.872713	1.34193	0.898	0.695548	0.718056	0.557851	1.37633	1.29238	1.05521	0.815051	0.639895	0.712745	0.554998	0.70699	0.394594	0.874556
7	16.55	5	1	0.743471	1.16857	0.916629	0.732511	0.681447	0.99254	0.516737	0.823337	0.788278	0.490797	0.499188	0.505679	1.00458	1.04111	0.748565	1.21199	0.970643	0.870161	1.00331	0.851525	0.6666	1.36317	0.756415	1.16926	NaN	NaN	0.856816	1.23926	0.291098	0.355182	1.10284	1.29353	1.25552	1.30477	1.12635	1.27516	0.830618	1.02359	1.09529	1.4455	0.736885	1.44642	0.568409	0.914205	0.340355	0.514497
7	17.175	4	1	0.922566	0.912505	0.66073	0.887071	1.35817	1.19075	0.554183	0.685005	0.674505	0.520077	0.303686	0.34543	0.531383	0.530858	0.560914	0.342711	0.924447	0.561707	1.26214	0.988608	1.01919	1.02853	0.742873	0.845261	NaN	NaN	0.539512	0.387677	0.593251	0.533637	0.869628	0.745	0.574068	0.66996	0.576002	0.484848	1.09492	0.91523	0.922856	0.815357	0.953185	1.24714	0.732334	0.958891	1.3009	1.2923
7	19.5	2	1	1.31934	1.45616	0.733847	0.687955	0.910294	1.01445	0.611708	0.653627	1.05912	1.03899	0.92305	1.12282	1.01295	1.08993	0.825535	1.32878	0.926974	0.938994	1.18126	1.15692	1.20831	1.3223	0.955703	0.999011	NaN	NaN	0.712329	0.887158	0.792139	0.39555	0.425861	0.804986	0.623626	0.655892	0.679489	0.356318	1.28897	0.892318	0.814831	1.04528	1.20474	1.34714	0.677544	1.23079	0.48728	0.852255
7	19.65	2	1	0.876545	1.09577	0.372042	0.690959	1.23176	0.944504	0.781981	0.546655	1.15852	1.22152	0.512433	0.780644	0.875055	1.06368	1.35146	0.988442	1.12361	0.976011	1.04093	1.11042	1.37553	1.03113	1.07822	1.08412	NaN	NaN	1.22176	0.884536	0.93644	0.689586	0.691626	0.550604	1.21439	1.09656	0.895071	1.25538	1.21815	1.0685	1.4038	1.30541	0.725622	1.1961	0.618795	0.921461	1.29496	0.698388
7	20.2	2	1	0.630412	0.386734	0.832892	0.633931	0.889376	0.813457	0.895579	0.56692	0.756674	0.805811	0.654329	0.710875	0.549727	0.565818	0.270217	0.59536	0.488391	0.701244	0.586633	0.563892	0.606938	0.644681	0.900931	0.789018	NaN	NaN	0.850933	1.06653	1.08305	1.24432	1.13925	0.855861	1.06692	0.984457	1.43069	1.09144	0.971825	1.04108	0.631415	0.794593	0.615322	0.412528	1.02252	0.867144	0.986194	1.00482
7	20.525	2	1	1.27931	1.52869	1.39652	1.61756	1.26322	1.44866	0.953974	0.583374	1.41308	1.07352	1.67069	1.71196	1.35362	1.30547	1.15288	1.05613	1.55408	1.59991	1.36682	0.815243	1.56552	1.33422	1.61752	1.52561	NaN	NaN	0.996273	1.4997	1.65086	1.61889	1.00747	1.15773	1.52707	1.43104	0.91918	0.953285	1.67657	1.75415	1.63517	1.57977	1.38212	1.10107	1.11853	1.04515	0.980031	0.792281
7	21.125	3	1	1.5511	1.41567	1.32998	1.63753	1.16678	1.28613	0.921856	1.0287	1.34742	1.45535	1.62488	1.60321	1.1519	1.0053	0.765713	1.2246	0.610219	0.75943	0.810009	1.19587	1.04439	0.885017	0.657647	0.775414	NaN	NaN	1.11405	0.895405	1.41374	1.1	1.26955	1.46742	0.476638	0.607369	0.695239	0.905798	0.800385	1.06588	1.02917	1.30786	1.22291	1.42659	1.33188	1.20763	1.69761	1.70387
7	23.25	3	1	0.573967	0.98043	0.46363	0.507119	0.618512	0.912601	0.720983	1.31256	1.11292	1.27255	1.09001	1.05519	1.34306	1.38474	1.15612	1.63266	1.48765	0.980744	1.23422	1.46801	1.20768	1.24724	1.12807	1.03891	NaN	NaN	1.31633	1.1629	1.18166	0.943049	1.14483	0.925724	0.846179	0.859887	1.12445	1.01792	0.623546	0.991713	0.797037	1.04784	0.825074	1.31228	0.718239	0.898985	0.274438	1.0774
7	23.7	2	1	0.694617	0.488349	1.16774	0.654409	0.992374	0.732394	1.18327	0.932684	0.989399	1.30668	1.39092	1.41358	1.58296	1.10941	1.42677	1.51061	1.38565	0.555979	1.07733	0.855148	0.863974	0.739931	1.0701	1.0235	NaN	NaN	1.20536	0.774822	1.11039	1.13136	0.831942	0.749685	1.25734	0.804879	0.852285	0.561814	1.14413	0.941012	1.32082	0.799048	0.609451	0.609346	0.934013	0.803068	0.577219	0.681877
8	1.55	3	0	0.522236	0.612375	0.64037	0.185213	0.316099	0.309321	0.667714	0.465366	0.567213	0.613548	0.203352	0.401586	0.347944	0.203408	0.316386	0.263559	0.483057	0.179533	0.357703	0.270244	0.368173	0.354395	0.560998	0.288904	NaN	0.0538044	0.334543	0.304211	0.475637	0.385322	0.345249	0.263611	0.478381	0.169775	0.315822	0.213	0.438487	0.320885	0.518688	0.289848	0.382339	0.333905	0.542159	0.438269	0.927955	0.0943467
8	1.775	3	0	0.413424	0.755142	1.27587	1.29797	0.99365	0.902031	0.398857	0.900639	0.552945	0.246655	0.321546	0.529171	0.603675	0.423871	0.360419	0.300835	0.257218	0.497746	0.36618	0.504247	0.539447	0.432696	0.465552	0.545747	NaN	0.278385	0.991602	0.537148	0.660726	0.907082	0.356044	0.445298	0.535011	0.179474	0.59365	0.270688	0.813442	0.689886	0.643319	0.455332	0.54571	0.683299	0.3945	0.472141	0.786236	0.334884
8	2.6	2	0	0.618415	0.44531	0.75453	0.485026	0.363399	0.248771	0.858531	1.46898	0.385446	0.450491	0.567566	0.501011	0.461631	0.376225	0.356167	0.712033	0.405283	0.271661	0.479373	0.271818	0.438169	0.379922	0.414519	0.343568	NaN	0.0537434	1.06698	0.538059	0.743702	0.754173	0.141271	0.203015	0.363867	0.142439	0.411457	0.184213	0.431581	0.335113	0.697936	0.177201	0.558187	0.343622	0.352017	0.205089	0.671503	0.216178
8	3.2	8	1	0.366822	0.4275	0.573904	0.507158	0.741414	0.732417	0.350194	0.445313	0.575599	0.410117	0.22284	0.428275	0.382406	0.470663	0.272148	1.11006	0.172537	0.500523	0.392565	0.856386	0.453643	0.522927	0.48258	0.675119	NaN	0.121824	1.01724	0.945084	0.39266	0.611627	0.317289	0.23112	0.391204	0.408001	0.596035	0.276394	0.406296	0.429671	0.760689	0.77781	0.56817	0.56671	0.317628	0.576952	0.370438	0.136652
8	4.875	2	0	0.863637	0.818174	1.08343	1.03706	1.18107	0.914023	1.20981	1.27156	0.741427	1.367	0.939204	0.71973	0.690888	0.520766	0.261324	0.633599	0.963648	0.93299	0.915801	0.627908	0.838624	0.814196	0.720448	0.894173	NaN	0.928801	1.0551	0.878837	1.04974	0.891488	0.31782	0.418273	0.602045	0.520949	0.623591	0.440821	0.560033	0.445008	0.685956	0.671145	0.424178	0.447303	0.868366	0.567812	0.521966	0.731035
8	5.6	9	0	0.90454	1.14576	0.630298	0.873858	0.795539	0.613225	1.28962	1.13843	0.887476	0.435126	0.753144	0.943403	0.366865	0.637045	0.381363	0.480909	0.386517	1.10206	1.00509	0.966961	0.906638	0.859666	0.898194	0.908062	NaN	0.624914	1.38206	1.07463	0.701509	0.690811	0.49275	0.511993	0.837715	0.930366	0.834156	0.935368	0.600872	0.421032	1.24786	0.8867	0.815766	0.801462	1.00551	0.677261	0.658024	0.569784
8	6.45	2	0	0.837346	1.02696	0.788994	1.01578	1.36232	1.01822	0.902572	0.99577	0.386222	0.765313	1.41946	0.934545	0.996641	0.935001	0.619794	0.91788	1.14788	1.57534	1.45434	1.30707	1.30644	1.26097	1.26343	1.35987	NaN	0.555443	0.685836	0.805173	1.29595	1.29952	0.757587	1.07298	1.01914	1.2853	1.0395	1.30628	0.679837	0.989284	0.890219	1.35729	0.813917	0.966199	1.2098	1.23706	1.29714	1.484
8	10	2	0	0.275197	0.370497	0.44305	0.460259	0.366765	0.260667	0.6469	0.716362	0.869242	0.876472	0.22389	0.40635	0.243836	0.530645	0.274134	0.547334	0.229961	0.501424	0.475868	0.587161	0.303755	0.384556	0.188511	0.257222	NaN	0.240832	0.286159	0.347293	0.267501	0.35811	0.471781	0.404196	0.484058	0.404494	0.81666	0.339483	0.809967	0.605718	0.400201	0.524575	0.396069	0.499369	0.528128	0.508819	0.734565	0.455097
8	10.2	4	1	1.23686	0.947671	1.0047	0.776353	1.47834	1.03821	0.657832	0.723069	0.644726	0.853197	0.496903	0.586583	0.188536	0.388585	0.158417	0.6291	0.416445	0.865909	0.903987	0.905574	0.577556	0.738088	0.911577	0.798218	NaN	0.417359	1.03831	0.601415	0.434398	0.748636	0.540639	0.731289	0.628828	0.595835	0.638931	0.681891	0.7645	0.604244	1.13115	0.817284	1.13742	0.814599	0.661446	1.03337	0.854231	0.321341
8	10.75	4	0	0.270225	0.236689	0.208464	0.180749	0.354755	0.412012	0.205573	0.445701	0.30848	0.322281	0.107007	0.206665	0.129714	0.176699	0.0903516	0.145891	0.150777	0.22955	0.186825	0.232583	0.113637	0.174202	0.196351	0.179361	NaN	0.121388	0.439211	0.320164	0.159632	0.218419	0.140028	0.203495	0.159254	0.106208	0.175813	0.102778	0.260582	0.204873	0.210263	0.213601	0.115442	0.249467	0.285546	0.255908	0.0924318	0.134541
8	11.425	2	1	0.761431	0.530768	0.537947	0.494985	0.796582	0.523099	0.617668	0.479209	0.442955	0.6185	0.453553	0.463968	0.281657	0.84451	0.176786	0.768117	0.309089	0.573661	0.778732	0.581219	0.362714	0.563246	0.546475	0.604631	NaN	0.228905	0.59352	0.65949	0.450193	0.880046	0.382458	0.388353	0.46369	0.371663	0.458675	0.25166	0.290037	0.251275	0.656764	0.469024	0.583972	0.437707	0.451698	0.658718	0.267596	0.3718
8	12.825	3	1	0.688023	0.683297	0.895876	0.785454	0.626099	0.562119	0.933829	1.15633	0.79368	0.359525	0.612833	0.516304	0.265435	0.255827	0.146331	0.687082	0.256258	0.576268	0.349363	0.386402	0.357727	0.458231	0.361174	0.511989	NaN	0.31491	0.25545	0.408465	0.718195	1.25091	0.201283	0.338301	0.399224	0.377996	0.437696	0.27595	0.333816	0.322987	0.722427	0.387935	0.528389	0.295149	0.32989	0.522477	1.10235	0.426652
8	14.15	6	0	0.580387	0.784652	0.707078	0.683311	0.505855	1.15457	0.844269	0.814584	1.01316	0.657192	0.459576	0.672797	0.523219	0.531779	0.451673	1.33956	0.671555	0.748522	0.731559	0.621598	0.686876	1.07336	0.772343	0.989204	NaN	0.483081	1.40293	0.798227	0.597548	0.979582	0.253746	0.444307	0.761483	0.621411	0.385094	0.391278	0.383211	0.650291	0.916882	0.836305	0.644082	0.659138	0.55731	0.581536	0.614402	0.340403
8	15.025	5	0	0.269218	0.334728	0.750527	0.423079	0.34262	0.477812	0.672363	0.868531	0.802763	0.874913	0.647739	0.518265	0.470789	0.571773	0.237196	0.264889	0.539159	0.494214	0.633733	0.436632	0.453237	0.383054	0.520116	0.440639	NaN	0.184489	1.23838	0.500686	0.653894	0.836473	0.18809	0.34379	0.64969	0.22097	0.613496	0.23072	0.411395	0.227491	1.1302	0.27098	0.891489	0.460267	0.702151	0.415328	1.1799	0.223359
8	15.75	2	1	1.46845	1.43188	1.37371	1.59793	1.36428	0.59594	1.31786	1.43973	1.22392	1.52464	1.35088	0.918564	0.954961	1.16526	0.629961	0.61855	0.745439	1.05412	1.56561	1.34182	1.00155	0.827753	1.12618	0.929713	NaN	1.05098	0.763969	0.707025	0.562977	0.897492	1.6264	1.3797	1.44056	1.35552	1.54734	1.26207	1.55875	1.37655	1.29455	1.15929	1.40594	1.50588	1.05551	1.16658	1.51445	1.59114
8	16.55	3	0	1.49511	1.51533	1.46269	1.45726	1.34357	1.15757	1.00908	1.45792	1.02843	1.16093	1.45324	0.925285	1.39461	1.29595	1.45391	0.905664	1.41901	1.25629	1.2663	1.69744	1.32146	1.42258	1.5233	1.38387	NaN	1.37892	1.51781	1.3994	1.2035	1.02306	1.82108	1.7274	1.57905	1.81119	1.674	1.80303	1.67601	1.75483	1.55354	1.65265	1.64063	1.76566	1.2257	1.34178	1.29761	1.79726
8	17.175	0.5	0	1.19901	1.44976	1.31601	1.21708	1.39738	1.13771	1.5593	1.14232	1.55069	1.06041	1.37051	0.844829	0.977265	0.981869	1.10764	0.973111	1.03944	1.0467	1.54156	1.485	1.31559	1.32049	1.25665	1.39257	NaN	1.05722	1.09468	1.10084	1.01185	1.08623	1.57958	1.3782	1.33801	1.53269	1.51972	1.61457	1.53672	1.69586	1.31515	1.31901	1.43919	1.43912	1.27726	1.28378	1.38211	1.28495
8	19.5	1	1	1.02084	0.928019	0.944205	0.942103	0.541815	0.725155	0.841066	0.883419	0.624279	0.658929	0.79468	0.567998	0.786224	0.758449	0.643949	0.558184	0.474139	0.666828	0.562959	0.721221	1.04089	0.850807	0.368371	0.491268	NaN	0.646294	0.715544	0.506574	0.825463	0.578202	1.01762	0.619146	0.71556	0.619677	0.832434	0.695814	0.620848	0.779463	0.437579	0.576714	1.06436	0.994041	0.547768	0.540373	0.649326	0.824311
8	19.65	0.75	1	1.39607	1.43588	1.2163	1.16828	1.27326	1.31092	0.612998	0.526013	0.575484	0.151653	0.680336	0.397202	0.661312	0.803984	0.990693	0.596481	0.719536	0.960731	0.735715	0.686172	1.21877	1.02227	0.894691	0.88505	NaN	0.606134	0.748593	0.65623	0.869603	0.746245	0.936832	1.00481	0.801755	0.571919	0.86053	0.699488	0.876388	0.975713	0.935815	0.699133	1.40138	0.91891	0.817649	0.462347	1.31383	0.616395
8	20.2	3	1	1.19058	0.956989	1.03581	0.824495	0.632016	1.01914	0.581189	0.418385	0.456407	0.36012	0.888847	0.546737	0.409672	0.279738	0.450942	0.245432	0.480665	0.600511	0.910083	1.00564	0.658831	0.857725	0.684803	0.703685	NaN	0.11243	0.277087	0.787062	1.10915	0.684305	0.498299	0.804242	0.454315	0.577933	0.508464	0.318021	0.317406	0.394056	0.717251	0.455463	0.488716	0.739817	0.747436	0.734292	0.588021	1.23924
8	20.525	5	0	1.11191	0.85473	0.647336	0.617188	0.969507	1.18835	1.04487	0.674164	0.791523	0.610227	0.794895	0.660739	1.05429	0.545141	0.647745	0.763395	1.12	0.868878	0.821743	0.763823	0.976881	0.682991	0.961378	0.997882	NaN	0.403309	1.04945	1.10334	0.648881	0.653014	0.63846	1.3828	1.03154	0.682425	0.770565	0.523076	0.839184	0.740033	1.15455	0.565078	0.770312	0.656488	0.812525	0.556842	0.333533	0.197146
8	21.125	2	1	0.752009	0.697302	1.39635	1.15271	0.397649	0.386567	0.584671	0.293353	0.476775	0.641277	0.598105	0.574155	0.718088	0.325766	1.13605	0.285931	0.411447	0.754245	0.872339	0.545557	0.740013	0.547466	0.548921	0.563357	NaN	0.259586	0.487658	0.439316	0.504894	0.638537	0.527274	0.482176	0.840225	0.65027	0.544313	0.777719	0.700851	0.694	0.987003	0.589041	0.643236	0.821138	0.672352	0.477879	0.570402	0.6767
8	23.25	1	1	1.5105	1.52025	1.04697	1.2421	1.65079	1.63826	1.52335	1.69898	1.47528	1.68006	1.66679	1.8292	1.84728	1.85936	1.78565	1.82589	1.92609	1.38067	1.54373	1.31419	1.66299	1.69671	1.6373	1.76527	NaN	1.84783	1.00871	1.43371	1.75023	1.66781	1.73123	1.65858	1.41948	1.31216	1.64664	1.58802	1.61802	1.75121	1.39667	1.49151	1.46746	1.79262	1.62314	1.42431	1.80033	1.84402
8	23.7	1	1	1.49285	1.31522	1.0868	1.00811	0.996634	1.03604	1.65768	1.61448	1.14086	1.5655	1.46169	1.72743	1.7834	1.81613	1.62622	1.7462	1.71259	1.32579	1.37677	1.06555	1.60361	1.58883	1.48239	1.47322	NaN	1.90295	1.36489	1.27269	1.40216	1.36587	1.52422	1.44314	1.17563	1.4393	1.64594	1.03275	1.50173	1.30363	1.03875	0.873772	1.54956	1.20218	1.19864	1.4653	1.55936	1.12487
9	1.55	1	1	1.02567	0.938409	0.553442	0.202471	1.11004	0.995236	0.799356	0.550593	0.867613	0.639455	0.372523	0.646939	0.843371	0.810836	0.633538	0.719717	1.09304	1.33912	0.968148	0.709023	1.05355	0.937774	1.20178	0.906447	0.448218	0.169449	1.35245	1.60169	1.3985	0.927467	0.711898	0.464382	0.562445	0.828667	0.628135	1.11621	0.635124	0.72533	1.01036	0.800897	1.08236	0.659379	0.8105	0.803264	0.819564	0.517265
9	1.775	2.33333	1	0.907511	1.13664	0.457783	0.739131	0.82746	0.868713	0.622774	0.746388	0.36997	0.990436	0.791446	1.0019	0.728486	1.02136	0.920339	0.541326	1.16718	0.923939	0.737265	1.07323	0.845213	1.06348	1.07758	1.03228	0.308915	0.165659	1.08213	1.45561	0.966785	1.21825	0.873173	0.812605	0.826728	0.984454	1.18648	0.929198	0.95534	0.677312	1.21767	1.2456	1.31263	1.26539	0.890853	1.25478	1.03456	0.723633
9	2.6	3	1	1.02848	0.955287	0.479296	0.638356	0.551133	0.666936	0.565592	0.722784	0.82891	1.00368	0.249669	0.337857	0.460064	0.640014	0.716269	0.441421	0.727232	0.219053	0.960916	0.726442	0.770677	0.614045	0.823735	0.584204	0.0654748	0.137108	1.38791	0.773354	0.411434	0.429903	0.808601	0.762938	0.746109	0.704804	0.903227	0.804761	0.601155	0.738084	0.78199	0.570433	0.812544	0.674094	0.484836	0.78877	0.811377	0.483871
9	3.2	2	1	1.00476	0.895911	1.04746	0.916486	0.908104	1.13069	0.939064	1.13461	1.32194	1.34788	1.25801	1.22386	1.06004	1.12164	1.31773	1.19184	1.40293	0.743999	0.938643	1.05804	0.853828	0.779286	1.06353	1.13882	0.627499	0.215386	1.01006	1.19866	0.857565	1.06565	1.04246	1.2401	1.16054	1.0119	1.15311	1.08403	0.97395	0.948675	1.04849	1.17554	1.02851	0.990694	1.22556	0.91258	1.18299	0.752929
9	4.875	1.66667	1	0.707045	0.522555	0.838849	0.728973	0.909294	0.711143	0.763997	0.775444	1.04863	0.902201	0.327718	0.758063	0.563733	0.6781	0.418603	0.7101	1.00532	0.923324	0.988726	1.03794	0.797148	0.945709	0.848365	0.844381	0.790402	0.556276	1.19305	0.540448	1.38022	1.35807	0.865611	1.03562	0.579452	0.694354	0.795744	1.04928	0.80578	0.940136	1.04695	1.20611	1.00112	1.06729	0.800366	0.664709	0.394639	0.444696
9	5.6	1	1	0.789631	1.0258	0.865101	0.728943	0.703724	0.891711	0.53822	0.844602	1.08473	0.930207	0.275968	0.319039	0.731106	0.637381	0.263829	0.46692	0.967223	0.850317	0.837201	1.57822	0.508946	0.648994	0.756819	0.998405	0.147752	0.255303	0.622434	0.77647	0.8429	0.900075	0.749356	0.964317	0.731059	0.97942	0.970635	0.807661	0.794784	0.839513	1.0279	0.876937	0.88848	1.33632	0.927281	0.7641	0.622446	0.818802
9	6.45	8	1	0.963794	1.21885	1.1953	1.58365	1.0253	1.12315	1.49808	1.39283	0.710562	0.283761	1.18637	1.26732	1.0671	0.965587	0.818403	0.350097	1.24067	0.879528	1.36699	1.39987	1.32088	1.25588	1.35399	1.12641	1.57036	0.938002	0.770168	1.06071	1.03866	1.05661	0.968558	1.34712	1.19503	0.748876	1.16621	0.69711	1.11701	1.22853	1.13281	1.10781	1.31688	1.45723	1.10469	1.15807	1.02509	1.03482
9	10	0.25	1	0.941165	0.780938	0.712032	0.645228	0.584939	0.736723	0.402769	0.765678	1.26033	0.738774	0.181467	0.463912	0.839443	0.974577	0.39825	0.600752	0.340036	0.740568	0.86481	0.92519	0.280373	0.46555	0.455562	0.438382	0.534951	0.443359	0.523497	0.576593	0.891264	1.24515	1.05699	0.696163	0.747943	0.77517	1.01631	1.02574	1.1348	1.15973	0.613088	0.87886	1.15593	0.797831	0.762073	0.747751	0.769874	0.708122
9	10.2	1	0	1.09695	1.01665	1.45692	1.29585	1.1383	1.3551	0.747863	0.577946	0.529914	0.925332	0.855856	0.612585	0.617335	0.589956	0.959288	0.582077	0.879021	0.746915	1.18101	0.853824	1.0144	0.928916	0.868341	0.791146	1.26608	1.1783	0.743884	0.555363	0.692177	0.788946	0.812876	0.974598	1.02066	0.558639	1.06708	0.837499	0.957307	1.00396	0.970802	0.865323	1.38994	1.19012	0.731398	0.607403	1.03903	1.4201
9	10.75	1.33333	1	0.752715	0.851164	1.03329	1.17797	0.862992	0.475317	0.348083	0.31626	1.0296	0.858954	0.220372	0.465376	0.410829	0.349456	0.355486	0.231232	1.09387	0.635499	0.322491	0.30584	0.319862	0.196855	0.522274	0.465431	0.1891	0.205615	0.866036	0.745792	0.733637	0.651357	1.11386	0.658384	0.510971	0.66773	0.852522	0.701969	0.632002	0.335547	0.718641	0.779169	0.576916	0.459943	0.630726	0.604856	0.491201	0.607417
9	11.425	0.5	1	0.607456	0.698412	0.726356	0.576955	0.358332	0.71647	0.275819	0.414841	0.540316	0.341846	0.296565	0.311313	0.254573	0.27012	0.222457	0.2145	0.888231	0.586843	0.641867	0.64837	0.383598	0.532596	0.58214	0.516665	0.202464	0.0889283	0.565065	0.926525	0.335015	0.510657	0.561926	0.578538	0.561968	0.698617	0.402377	0.703519	0.506179	0.397955	0.426693	0.698813	0.703926	0.95135	0.844086	0.584046	0.480839	0.527588
9	12.825	0.5	1	1.09702	1.11579	1.14726	1.37143	1.14843	0.87321	1.67341	1.62451	1.39021	0.994719	1.78677	1.64614	1.63054	1.5668	1.82854	1.59625	1.5212	1.3456	1.41949	1.4459	1.6415	1.5353	1.4732	1.50547	1.8153	1.88331	1.05625	0.945197	1.69472	1.72127	1.60346	1.23173	1.22303	1.13649	0.864846	0.833003	1.04377	0.425461	1.09735	1.08142	1.37604	1.1498	1.11176	1.2331	0.870633	1.44874
9	14.15	1	1	0.665665	0.579838	0.995084	0.431712	0.656937	0.677388	1.14828	0.800672	0.445423	0.705168	1.16449	0.84438	1.18993	0.864134	1.57311	0.488928	1.06336	0.709714	0.489848	0.459169	1.09175	0.567685	0.704423	0.719885	1.327	0.911249	0.483797	0.699003	0.995566	1.39398	0.531261	0.463488	0.590518	0.565065	0.61657	0.851202	0.394514	0.431428	0.493567	0.648489	0.551905	0.544935	0.539171	0.5002	0.315023	0.191896
9	15.025	0.333333	1	0.428702	0.567479	0.750549	0.686127	0.582271	0.668254	0.536756	0.766105	0.58091	1.37892	0.638372	0.42423	0.260986	0.473316	0.334164	0.145878	0.689589	0.601664	0.59104	1.16404	0.551263	0.359483	0.56635	0.6842	0.142666	0.0598933	0.614156	0.606962	0.903984	0.89314	0.621389	0.57412	0.484643	0.498182	0.577839	0.784692	0.904767	0.993537	1.16455	0.942601	0.815544	1.11863	0.365957	0.595576	0.307189	1.30747
9	15.75	1	1	1.16149	1.04361	0.929192	0.544694	1.09676	1.05208	1.21238	1.27142	0.748574	1.4188	1.47217	1.2423	0.868037	1.05001	0.969784	0.823295	0.596245	0.500192	0.69256	0.85963	1.15885	1.05323	0.854407	0.777299	0.76348	0.644485	0.927108	0.550398	1.28386	1.41355	1.04889	0.78402	0.605281	0.473939	0.935016	0.727523	0.911147	0.98317	0.827073	0.701926	1.01444	0.846285	0.391123	0.53899	0.552875	1.02066
9	16.55	1.33333	1	0.781776	0.84257	0.714773	1.11144	0.90876	1.00164	1.36347	1.06615	1.01894	0.999487	0.897303	1.09714	1.22388	1.14211	1.14039	1.28959	0.901935	1.35368	0.730111	0.759268	0.935962	0.979934	0.721317	0.909131	1.07244	1.44456	0.751637	0.564221	1.50547	0.810892	0.852525	1.03209	1.05556	0.888274	1.01344	0.914888	0.987641	1.00115	0.796207	0.866831	1.10437	1.07236	0.539961	0.691119	0.356546	0.925215
9	17.175	3	1	1.29273	1.04019	0.738918	0.807822	1.19739	1.54233	1.6184	1.05499	0.67358	0.86993	1.19001	1.07	1.00896	1.11297	1.03789	1.54754	1.39918	1.01751	0.872338	0.937563	1.09669	1.11016	1.22574	1.30423	1.50625	1.51538	0.576159	1.38643	1.13964	1.38787	1.12851	0.961087	0.903148	0.989604	1.05486	1.0269	0.930366	0.871674	1.39986	1.22317	1.2227	1.19328	0.98394	0.993229	0.862088	1.12624
9	19.5	1.33333	1	0.507037	0.712913	0.470952	1.04777	0.573905	0.851967	1.07115	0.998989	0.71259	1.34246	0.627494	0.895069	0.812524	0.543961	1.09863	0.675411	0.722714	0.723373	0.524079	0.664161	0.902562	0.741571	0.826728	0.89656	0.454158	0.576074	0.756104	0.822179	1.07879	0.828607	0.765083	1.00256	0.852907	0.901592	0.907563	0.708086	0.781016	0.799023	0.891338	0.580889	0.644951	0.864756	0.705286	0.808328	1.177	0.829036
9	19.65	1	1	1.03627	0.871786	1.09214	0.955657	1.03668	0.757908	1.22765	1.14104	1.25346	1.157	0.623633	0.903613	1.16349	1.15357	0.415581	0.959644	1.0704	0.38383	0.74563	0.877299	0.894006	0.939943	1.26033	1.08547	1.27263	0.866757	1.4307	1.28994	0.831372	0.948947	1.05926	0.652949	1.24371	1.37148	0.858453	1.22188	0.949813	1.12395	1.15647	0.876282	0.844132	0.836544	1.17372	0.713927	0.955603	0.971868
9	20.2	0.333333	1	1.05522	1.02734	1.10637	0.640028	0.76562	0.848606	0.37808	0.982585	1.32691	0.885317	1.04264	0.768151	0.651829	0.617927	0.894411	0.669486	0.792813	0.431437	1.17523	0.973279	0.747122	0.825289	0.951095	0.749194	0.374708	0.17645	0.432202	0.427249	0.718938	0.459323	0.75234	0.927847	0.863568	0.867098	0.901236	0.714764	1.23894	0.950836	1.04378	0.690427	1.19233	0.980007	0.924066	1.04668	1.17011	1.55884
9	20.525	1.33333	1	0.982477	1.15827	0.897352	0.962165	0.824367	0.991605	1.59935	1.5191	1.26012	1.07528	1.769	1.8063	1.76065	1.71581	1.7696	1.61509	1.13407	1.30709	1.29694	1.05636	1.32785	1.31947	1.18885	1.2105	0.72585	1.31199	1.03643	1.46802	1.58087	1.163	1.05302	1.12662	1.36886	1.13017	1.24207	0.98794	1.3122	1.18406	0.98921	1.00123	0.501993	0.900362	1.4286	1.07009	0.538061	0.726899
9	21.125	2.5	0	0.830253	1.01864	0.658894	0.765573	0.78194	1.2558	0.8607	0.849865	0.99844	0.713076	0.479624	0.399747	1.12147	0.688043	1.33178	1.04309	1.10677	1.40778	1.29533	1.15568	0.843374	0.763025	1.09713	1.1989	0.871118	0.731714	1.32406	0.978384	0.517045	0.866245	0.537757	0.583796	0.867502	0.979376	1.08803	0.942008	1.22159	1.14804	1.18841	0.763061	1.21908	1.32368	1.2668	1.21199	1.37257	0.745962
9	23.25	0.666667	1	0.328437	0.29962	0.738797	0.855776	0.560642	0.333237	0.900968	1.24821	1.24209	1.26945	1.04291	0.964591	1.02032	1.16289	1.15642	0.514989	0.658908	0.368131	0.801255	1.12712	0.816979	1.11294	0.714183	0.941009	0.644732	0.622373	0.732355	0.352304	1.01432	0.912968	0.666243	1.01569	0.912205	0.898308	1.00717	0.917422	0.724489	0.953113	0.612505	1.01103	0.561517	0.562468	0.413888	0.538888	0.22444	0.832066
9	23.7	0.166667	1	0.576515	0.484908	0.922769	0.744055	0.549411	0.650304	0.94024	0.831386	0.604157	1.04035	0.513256	0.828097	1.02298	0.890125	0.859046	0.328359	0.302709	0.516997	0.726732	1.00646	0.506743	0.896082	0.640721	0.840984	0.76405	0.390976	0.751789	0.766265	0.593229	1.10065	0.525175	0.727165	0.841433	0.4794	0.782967	0.508806	0.74261	0.553129	0.614801	0.469928	0.999304	0.455528	0.518118	0.635732	0.667695	0.572506
10	1.55	7	1	0.667191	0.677465	0.339922	0.677678	0.664207	0.495694	0.424081	0.50852	1.36584	0.752433	0.850625	0.777776	0.694029	0.34532	0.93494	0.892343	0.91976	0.48698	0.6502	0.665416	1.06287	0.928052	0.602009	0.640618	NaN	NaN	0.577672	0.407622	0.157094	0.260805	0.68492	1.16143	0.569793	0.775862	0.526018	0.56273	0.636209	0.932907	0.497549	0.610814	0.624112	0.843132	0.392977	0.437921	0.612216	0.741747
10	1.775	8	0	1.20287	1.1273	0.759191	0.821875	0.762525	1.09846	1.41	1.52156	1.13618	0.880045	0.774189	0.830605	0.821961	0.704838	0.879134	1.24373	1.25218	0.843943	1.22171	0.772965	1.05292	0.868496	0.991469	0.885447	NaN	NaN	1.1941	0.872785	1.02736	0.893143	0.52804	0.724241	0.982883	0.883247	1.14133	1.2922	1.09653	1.0203	1.61631	1.47114	1.09082	1.03582	1.07782	1.27036	0.502016	0.681051
10	2.6	2	0	1.12816	1.12386	0.636131	0.701349	1.50171	1.12693	0.65435	0.657268	0.420488	0.548241	0.681759	0.429396	0.831085	0.992575	0.705402	1.39447	1.08841	0.804662	1.33693	0.374193	0.568784	0.630244	0.703117	0.840221	NaN	NaN	1.20638	1.17234	0.527918	0.5004	1.16224	0.95216	0.930203	0.863619	0.801366	0.861718	0.939349	0.904329	0.945618	0.650042	1.07033	1.06875	0.943377	0.832131	0.352273	0.74654
10	3.2	4	0	0.472375	0.388002	0.391153	0.362755	0.372054	0.244081	0.383969	0.914724	0.537784	0.96817	0.965755	0.324979	0.530233	0.942527	0.746588	0.357917	0.820206	0.490746	1.35302	0.479563	0.748511	0.47554	0.708743	0.602176	NaN	NaN	0.387456	0.799438	0.451324	0.894311	0.520001	0.395736	1.25645	0.676398	1.10206	0.857153	1.06804	0.891652	0.74351	0.393483	0.698728	0.495529	0.821396	0.624072	1.17601	1.11994
10	4.875	3	1	1.05194	1.04916	0.739479	0.654226	1.26979	1.26917	0.975278	0.890203	1.23812	0.589583	0.665705	0.590555	0.459014	0.897406	0.261773	0.53987	0.498336	0.627987	0.907093	0.856828	0.71865	0.816996	0.934725	0.854348	NaN	NaN	0.485363	0.747622	0.998827	1.17822	1.02623	1.47053	0.851225	0.980333	0.932416	1.17763	1.49578	1.27415	0.565167	0.671484	1.1209	0.928779	0.579019	0.478976	0.675589	0.592044
10	5.6	3	0	1.02718	1.25886	1.37485	0.714445	0.411978	0.831067	0.805723	1.03627	0.920538	0.384773	1.1454	1.02332	1.43102	1.05227	1.13468	1.5326	1.25629	1.48509	1.43055	1.4288	1.42429	1.18126	1.27903	1.30974	NaN	NaN	0.796325	0.560446	1.49273	1.39388	0.922241	0.872546	0.90954	1.17834	1.00882	0.827929	1.00948	0.842956	1.23824	1.20731	0.941003	1.40847	1.43535	1.31509	1.41309	1.47162
10	6.45	17	0	0.866362	0.918234	1.09866	0.927204	0.88876	0.757948	0.781341	0.696186	0.824963	0.35878	1.01163	0.945675	0.995395	0.486353	1.01833	1.09676	0.544281	0.555357	1.35298	0.961126	0.827092	0.88081	0.626324	0.81901	NaN	NaN	0.598336	0.638061	0.829375	0.38648	0.562371	0.58422	1.30925	1.12723	1.12821	1.07646	1.02919	1.11743	1.13682	1.24032	1.02162	1.09696	1.08456	0.894301	1.31272	1.31872
10	10	10	0	1.00643	0.995987	0.455074	0.206686	0.453903	0.276884	1.05749	1.03639	0.499015	0.934653	1.22588	0.878506	1.08541	1.29581	0.98568	0.494276	0.65658	0.57527	0.93971	0.856249	0.824489	0.59851	1.06085	0.91409	NaN	NaN	0.585873	1.0689	1.07048	0.848379	1.11045	1.12623	1.18447	1.40228	1.18414	1.11947	0.801892	1.14543	1.34264	1.50097	0.938107	1.09031	0.763095	0.913536	1.14879	1.21384
10	10.2	4	0	0.535786	0.441333	0.762675	0.708328	0.639102	0.656002	0.424069	0.567843	0.528843	0.259428	0.295823	0.380852	0.209521	0.299955	0.401577	0.24378	0.59843	0.221639	0.617653	0.595302	0.664597	0.749294	0.418861	0.35867	NaN	NaN	1.02914	0.588634	0.6148	0.692091	0.875593	0.554888	0.300812	0.366579	0.273344	0.268607	0.467758	0.525415	0.27297	0.241971	0.820634	0.672721	0.415672	0.503546	1.0493	0.783619
10	10.75	7	1	1.17294	0.795143	0.55045	0.44808	0.579623	0.418659	0.739697	1.04418	0.701855	0.891508	0.435226	0.484765	0.476767	0.85163	0.422212	1.21227	0.324316	1.11322	0.812551	0.697746	0.839674	1.17547	0.556524	0.939142	NaN	NaN	0.821019	1.24875	0.810882	0.5874	1.25303	1.33562	0.625579	0.949557	0.846031	0.940119	0.734752	0.975407	0.52215	1.14568	0.859279	0.977627	0.861626	0.906402	0.590084	0.829143
10	11.425	3	0	0.429774	0.609661	0.193399	0.705849	0.692749	0.842914	0.488715	0.767546	0.90562	1.39181	0.343862	0.515063	0.884678	1.10533	0.606461	0.922525	0.94214	0.852391	0.839316	0.545173	0.586787	0.422636	0.878658	0.677867	NaN	NaN	1.42706	0.46697	0.447326	1.07401	0.753642	0.634801	1.09875	0.80308	0.886024	0.784304	0.883599	1.1497	0.654812	1.0402	0.652754	1.19654	1.08192	0.717865	1.58215	1.2127
10	12.825	5	0	0.69351	0.461797	0.548225	0.25668	0.434659	0.524363	0.374132	0.827989	0.79659	0.958025	0.499681	0.355446	0.481027	0.499003	1.14652	0.946033	1.18665	0.908266	0.716596	0.709046	0.86541	0.596858	0.640074	0.864636	NaN	NaN	0.684404	0.512193	0.580399	0.845445	0.747694	0.918807	0.938422	0.833689	0.986795	0.975392	0.588388	0.685142	0.700078	0.853575	0.975087	1.02167	1.24127	0.887733	0.789626	0.602388
10	14.15	8	0	0.288548	0.448949	0.282162	0.302857	0.626311	0.466212	0.606503	0.477801	0.883058	1.28877	0.972253	0.791494	0.553103	0.59089	0.745863	0.662089	0.326229	0.266544	0.660752	0.350171	0.514312	0.32567	0.565683	0.576667	NaN	NaN	0.215323	0.579542	0.584485	0.508971	0.652753	0.443667	0.494828	0.674572	0.698905	0.47285	0.589273	0.496042	0.507674	0.452843	0.267847	0.232709	0.632655	0.643108	0.746744	0.490929
10	15.025	5.06667	1	1.23318	1.14839	1.47531	1.44036	1.27281	1.50266	1.51928	0.911599	1.05742	1.41592	1.01745	1.27052	1.123	1.05701	1.10134	0.644502	1.15792	0.687879	1.17475	1.06481	1.45382	1.44887	1.18615	1.11562	NaN	NaN	0.828383	1.04887	0.952427	1.15356	1.55791	0.863697	1.359	1.02665	1.45704	1.12412	1.16814	1.35209	0.946505	1.365	1.08688	0.990693	0.858434	1.18093	1.1871	0.611607
10	15.75	2	1	1.32645	1.05821	0.643638	0.863567	0.474948	1.02459	0.62263	0.737019	0.505849	0.730256	0.654459	0.418979	0.706996	0.526357	0.45779	0.623741	0.580248	0.306391	0.989284	0.73152	0.985531	0.709619	0.557108	0.713666	NaN	NaN	0.442961	0.874213	0.722172	0.450065	1.18286	0.858823	0.887549	1.02662	0.560432	0.736607	0.904736	0.646866	1.12764	0.761815	1.31186	1.11592	0.822074	0.784154	1.4593	0.897268
10	16.55	3	1	1.16864	1.44703	0.459517	0.879015	0.902611	0.656712	0.692201	0.995884	0.426942	0.847438	0.957478	0.753957	0.991464	0.914831	0.998729	1.32606	1.00464	1.31214	1.27388	1.35844	1.09705	1.4536	1.02899	1.28901	NaN	NaN	0.62235	0.793684	0.887813	0.682113	0.564354	0.693115	1.1172	1.45756	0.931955	0.926717	0.846335	0.918873	1.35897	1.27935	1.04704	1.42703	0.720457	0.815227	0.668459	1.06714
10	17.175	3	1	0.925941	0.953472	0.533042	0.478501	0.873263	1.02867	0.738663	0.398941	0.601232	1.09701	0.230794	0.428727	0.343594	0.66276	1.43664	0.323398	0.996374	0.567864	1.32789	0.953893	1.00602	0.886239	1.04699	1.06145	NaN	NaN	0.776274	1.42863	1.08219	1.2853	1.09178	0.988367	0.941903	0.712416	0.937551	0.993826	0.967206	0.697843	0.749265	0.683906	0.970104	0.576874	0.754241	0.843871	0.47627	0.776108
10	19.5	3	0	1.48063	1.18814	1.75066	1.38604	1.20802	0.973035	0.945625	0.804853	0.903086	0.6691	1.09102	0.919032	1.05918	0.650965	1.07278	1.22402	1.22123	0.656396	1.41962	1.09867	1.33879	1.12084	1.36469	1.25632	NaN	NaN	0.571695	0.700299	1.40357	0.772414	0.868805	1.19703	0.610251	0.912726	0.250027	0.675626	1.27191	1.03935	1.24156	0.949846	1.5201	1.14357	0.73652	0.856606	0.314885	1.19954
10	19.65	3	1	1.21815	1.50168	1.81928	1.70237	1.54121	1.14197	0.712522	0.670829	0.829472	0.705847	0.723854	0.696119	1.23104	0.760869	1.15777	0.931554	1.07876	0.291809	1.28158	0.994341	0.999271	1.00791	1.07837	1.06584	NaN	NaN	0.708294	0.680814	0.800935	0.964958	1.24017	1.45933	1.05979	1.07315	1.03206	1.24117	1.4241	0.873461	1.342	1.23449	1.15822	1.27229	1.36727	1.10978	1.41803	1.35237
10	20.2	4	1	1.31979	1.15195	1.54884	1.51887	1.35512	1.59695	1.37482	1.17801	1.48778	1.55188	1.15049	1.52633	1.4594	1.02701	1.61826	0.921055	1.54953	1.32081	1.62888	1.35588	1.34806	1.11857	1.37015	1.15	NaN	NaN	1.4357	0.930758	1.56694	1.69604	1.04966	1.3723	1.20436	1.27021	1.04931	1.14727	1.01027	1.26654	1.39856	1.35951	1.04103	1.27219	1.53354	1.43119	1.47947	1.31432
10	20.525	5	1	1.21778	1.37595	1.29143	0.884375	0.594912	0.833795	1.217	1.04659	1.65136	1.60298	1.43683	1.39833	1.37894	0.933804	1.32745	0.953481	0.612532	0.669373	1.45453	1.63652	1.44031	1.48384	1.34318	1.19288	NaN	NaN	1.32798	0.872967	1.14098	1.61652	1.12454	1.18009	0.931908	0.896419	0.94102	0.846428	1.22244	1.16324	0.886076	0.625805	1.33746	1.28767	0.778374	1.01417	0.441304	0.844582
10	21.125	4	1	1.45194	1.12342	1.14341	0.948636	1.34775	1.37981	1.41975	1.38086	1.37201	1.18194	1.49238	1.45143	1.40391	1.35786	0.975858	1.17054	1.36281	1.6363	1.41636	1.40833	1.29652	1.37973	1.42239	1.10902	NaN	NaN	1.7635	1.33865	1.34715	1.36583	1.43496	1.24386	1.46564	1.37375	1.41863	1.52888	1.48406	1.23255	0.679983	1.16748	1.48577	1.30614	0.994382	1.35551	1.45896	1.52638
10	23.25	4	1	0.956037	0.688075	0.723723	0.736696	0.518909	0.336608	0.470677	1.0283	0.968271	1.19627	0.41984	0.267336	0.41259	0.591826	0.45845	0.867585	0.239608	0.455023	0.966553	0.56493	0.452158	0.585054	0.515332	0.599834	NaN	NaN	0.853549	1.09087	0.560678	0.59037	0.716802	0.538373	0.819788	0.527231	0.599139	0.796521	1.0592	0.979901	0.604099	0.488674	0.711043	0.963436	0.364631	0.306401	0.6624	0.162453
10	23.7	1	1	1.00348	0.691195	0.666967	0.575798	1.05046	0.691933	0.526588	0.634724	0.544709	0.553716	0.500959	0.687322	0.842383	0.622532	0.609452	0.706611	0.932111	0.200231	0.327189	0.320447	0.552349	0.586783	0.513892	0.616685	NaN	NaN	1.08924	0.603898	0.408231	0.536378	1.26613	0.847708	0.527601	0.369516	0.628592	0.66	0.934997	1.11077	0.607253	0.713907	0.471335	0.602495	0.827857	0.636258	0.266909	0.240815
11	1.55	5	0	0.633685	0.598986	0.441065	0.69096	0.484832	0.648223	0.320502	0.779572	0.26155	0.992211	0.702686	0.878974	0.559059	0.65814	0.559355	0.574324	0.427432	0.361383	0.502959	0.500577	0.600641	0.590465	0.524783	0.512934	1.12672	1.33004	0.57956	0.623806	0.579764	0.614239	0.328501	0.564795	0.502747	0.470629	0.430433	0.331952	0.622899	0.346497	0.413211	0.335331	0.700787	0.371962	0.52483	0.425748	0.547995	0.217019
11	1.775	13	1	0.771172	0.672636	0.749971	1.31058	1.10845	0.771379	0.639262	0.68013	0.265071	0.298304	0.573356	0.551999	0.698165	0.545169	0.708749	0.779252	0.470027	0.680695	0.670964	0.867548	0.521692	0.623535	0.622787	0.826668	0.313064	1.13273	0.599948	0.598645	0.746979	0.82796	0.747914	0.950247	0.648499	0.824818	0.750104	0.539964	0.590266	0.406043	0.675427	0.610951	0.780115	0.483722	0.712327	0.587622	1.25088	0.307117
11	2.6	20	0	0.739365	0.831102	0.666114	0.740498	0.80596	0.911955	1.30396	1.03569	0.650562	0.98625	0.817882	1.14911	0.902542	0.613236	1.06626	1.2468	0.923163	1.33905	0.885255	0.994094	1.12099	1.00289	1.07887	0.837276	1.65546	1.78561	0.709039	0.810178	0.847615	0.703839	0.813483	0.877814	0.971023	0.882695	1.02935	0.727355	1.04273	0.780458	1.23876	0.729373	1.13914	0.737138	0.870482	1.0382	0.956401	0.921377
11	3.2	15	0	1.09873	0.995487	0.558301	0.592038	0.879703	0.805974	0.90264	0.945626	0.693915	0.919109	1.11157	0.472411	1.18526	1.00352	1.21582	0.561339	0.538192	0.47801	0.818843	0.578544	1.0996	0.670036	0.576725	0.6506	1.12177	0.346289	0.581129	0.760517	0.953745	0.426693	0.757148	0.966143	0.739727	0.83012	0.708471	0.688972	0.969774	1.00073	0.883628	0.496191	1.08167	0.743015	0.773848	0.605908	0.920347	0.665431
11	4.875	15	1	1.41911	1.12263	1.39042	1.11937	1.19387	1.32772	1.09802	0.96709	1.07793	0.769822	0.949648	1.40715	0.821249	1.01359	0.451722	1.60179	1.34424	1.48592	1.12698	1.12775	0.89611	1.20188	0.834667	0.893938	1.17253	1.54178	0.779732	0.56661	1.38746	1.6244	1.1602	1.06123	0.955914	1.10512	1.02822	1.33229	1.09414	1.4766	1.05533	1.24415	1.26492	1.39522	0.71016	0.89724	0.568584	1.76785
11	5.6	20	0	1.13254	1.16616	0.788477	0.998401	0.862833	1.09125	1.34651	1.12241	0.637959	0.450753	1.5326	1.3921	1.08564	1.23796	1.01735	1.36424	1.52652	1.27077	1.28078	1.34766	1.20346	1.32386	1.40967	1.38226	1.65061	1.42996	1.31139	1.60037	1.46961	1.6957	0.982369	0.796676	1.13605	1.39531	1.00116	1.11326	0.979028	1.12541	0.561703	1.12854	1.19869	1.20869	0.994376	1.45566	1.07248	1.17713
11	6.45	25	0	0.758603	0.580853	0.732557	0.54482	1.18993	1.13571	0.60573	0.46377	0.934396	1.27423	0.299763	0.507849	0.554002	1.04764	0.279916	0.8446	0.651034	0.990824	0.455024	0.999578	0.74058	0.918264	0.539867	0.701021	1.42544	1.45411	0.158794	0.420288	0.234822	0.369936	0.558733	0.566279	0.704377	0.717445	0.483195	0.754239	0.731551	0.413954	0.81447	0.466701	0.592422	0.659173	0.703381	0.474814	0.872781	0.667392
11	10	3	0	0.854135	1.04205	0.64206	1.1231	0.95724	0.770981	1.01647	0.89294	0.807479	0.839356	1.12146	1.1013	0.639113	1.21378	0.428226	0.717082	0.403559	0.655207	0.594875	0.591245	0.597175	0.688316	0.605258	0.831123	0.794549	1.15601	0.530574	0.85487	1.41819	0.910871	0.875389	1.29556	0.896079	0.962427	0.868275	0.822701	0.885621	0.929229	0.759348	0.998115	0.949703	1.02615	0.453262	1.05711	1.26364	1.12995
11	10.2	17	0	0.660626	0.991211	1.04575	0.887675	1.15975	1.21798	0.692304	0.927994	0.753657	1.4075	0.749521	1.31732	0.77554	1.34059	0.352479	1.67298	1.13341	1.45894	0.885063	0.824952	0.954423	1.16119	1.20225	1.20453	1.44282	1.82311	1.02722	1.18321	1.29323	1.37493	0.754745	1.1256	0.738129	0.73225	0.733039	1.00932	1.01855	0.924954	0.923204	0.955343	0.890082	0.838819	0.597124	1.01925	0.656876	1.35141
11	10.75	10	1	1.17331	1.12746	0.73797	0.927282	0.701691	0.887766	0.57766	0.54482	1.15876	0.737242	0.78767	1.09441	0.590082	0.512672	1.13228	0.632457	0.825946	0.818006	0.665538	0.662028	0.858276	0.838957	1.07492	0.786595	1.77001	1.45284	0.873067	0.890223	0.771632	1.37406	0.653563	0.983383	0.755368	0.818282	0.866244	0.870435	0.971504	0.535616	1.05101	0.634788	1.07787	0.793121	0.767577	0.539207	0.966592	0.345828
11	11.425	12	0	0.675706	1.04859	1.24287	1.35522	1.07056	0.955608	0.96388	0.903384	0.685614	0.693636	1.25079	0.902117	0.640977	0.875076	0.186894	0.546091	0.411572	0.543842	0.635213	0.299718	0.437976	0.476825	0.390694	0.421008	0.665444	1.00324	0.821175	0.629066	0.772273	1.36412	1.03351	0.772814	0.932208	1.08143	0.89929	1.08898	0.809849	0.726512	0.409198	0.677675	0.605482	0.812409	0.514558	0.804218	0.995328	0.656299
11	12.825	15	0	1.48944	1.47779	1.27598	1.49914	1.18218	0.98944	1.3955	0.7479	1.16713	1.09605	1.7724	1.56586	1.03684	0.761039	0.939373	0.472227	1.17893	0.997649	0.734151	1.01224	1.10811	1.33755	1.12982	1.16802	1.88418	1.75372	0.898541	0.963074	0.605887	0.904854	0.871713	1.26899	0.889702	0.6939	1.05319	0.819131	1.33684	0.812264	1.24887	0.818408	1.4323	0.966412	0.968509	0.902579	0.986578	0.326612
11	14.15	10	1	0.636916	0.929969	0.387745	0.645393	1.34115	0.837737	0.926489	1.37222	1.19523	0.862284	0.230558	0.334213	0.530285	0.803458	0.600191	0.667137	1.23639	0.436297	1.149	1.30399	0.953785	1.09434	0.773876	0.8726	0.403397	0.250409	1.10252	0.844282	1.48098	1.00888	1.21274	0.840603	1.10133	0.942167	1.38954	1.32275	0.990954	1.22654	1.26685	1.46931	0.677644	0.918163	1.04088	1.03376	1.00633	1.33831
11	15.025	5	1	0.459902	0.58605	0.51244	0.388832	0.790009	0.399159	1.19266	0.638386	1.45031	0.565045	0.346056	0.780599	0.406758	0.663729	0.595646	0.674272	0.913832	0.489527	0.440367	1.01605	0.698282	0.675636	0.414561	0.566513	0.235919	0.377656	0.395504	0.702149	1.00215	1.2333	0.554658	0.498276	0.793662	0.691733	0.662796	0.516633	0.601148	0.837839	0.460463	0.755956	0.760753	0.852509	0.380496	0.680993	0.913472	0.828148
11	15.75	4	1	0.924073	0.835342	0.791919	1.09734	0.756303	0.719655	1.15733	1.10699	1.4298	1.16458	1.10993	0.747159	1.03635	0.8108	0.5139	1.13577	1.01383	0.495539	0.607221	0.440865	0.541971	0.511204	0.701979	0.4678	1.29874	0.915835	1.01337	0.717104	0.946153	0.470229	0.287479	0.251999	0.540684	0.415937	0.439811	0.421951	0.652603	0.54874	0.45307	0.296083	0.738626	0.545595	0.684319	0.667458	0.951916	0.35319
11	16.55	6	0	1.21886	0.7696	1.15794	1.02893	1.26753	1.03375	0.572871	0.679403	1.009	1.19227	0.870264	1.15484	0.785827	1.12173	0.580103	0.762439	0.735334	1.15959	0.849016	0.95345	0.983316	1.18817	1.39804	1.3138	0.420629	1.1961	1.60211	1.61554	0.493125	1.17882	0.982231	0.908978	0.833099	0.896413	1.2614	1.0621	0.904132	0.568892	0.929129	1.20783	1.15276	0.848132	0.733546	1.14384	0.571312	0.637096
11	17.175	6	0	0.919034	0.974355	0.960081	0.799752	1.11089	1.07614	1.36743	0.848297	1.18299	0.880933	1.13255	1.26032	1.06639	1.19392	0.476235	1.54744	0.994997	0.944173	0.712469	0.763013	0.980748	1.03658	0.797753	0.77862	0.814317	1.43812	1.04561	1.09352	1.14245	0.912581	0.871971	0.942246	0.875112	0.53157	1.15797	0.62522	1.17805	0.940446	1.03882	0.705497	1.03	0.669486	0.956522	0.799341	1.46935	0.682421
11	19.5	16	0	1.03359	0.825072	1.27622	0.885333	1.38076	1.53902	1.0793	0.852762	1.25996	1.53613	1.15119	1.4868	1.19493	1.25882	1.40255	1.3226	1.3039	1.14329	1.34321	1.37592	0.943081	1.04772	1.21156	1.14221	0.315321	1.54198	1.26333	1.3024	1.49558	1.38764	1.28224	1.14848	1.12524	1.23423	0.951943	1.01181	0.80079	1.04795	1.31544	0.987429	1.07842	1.33541	0.914676	1.24571	1.34871	1.11392
11	19.65	2	1	0.932039	0.816664	0.924012	0.905735	0.482103	0.409976	0.522937	0.428722	0.59707	0.311366	1.16639	1.2137	0.69004	0.76894	0.884911	0.615322	0.464036	0.530133	0.287046	0.724672	0.540357	0.707501	0.69662	0.57048	1.53975	1.64787	0.267117	0.461474	0.912797	1.18107	0.767916	0.733294	0.608923	0.810653	0.515233	1.02632	0.532314	0.733325	0.549567	1.23997	0.545669	0.86083	0.832223	0.511417	1.16863	0.306832
11	20.2	3	1	1.51976	1.65245	1.7658	1.74841	1.75386	1.81622	1.51231	1.22495	1.48339	1.28111	1.51112	1.33148	1.18251	1.51141	1.47151	1.53098	1.25607	1.03902	1.16755	1.34084	1.31689	1.43573	1.6143	1.51036	0.542737	1.41528	1.0499	1.32758	1.67353	0.716682	1.36502	1.42383	1.14977	1.15671	1.22448	1.0209	1.37753	1.51236	1.19043	1.49095	1.22518	1.2231	1.32588	1.53956	1.14638	1.35544
11	20.525	7	0	0.669952	0.625196	0.57185	0.72853	0.499873	0.389288	0.580142	0.609569	0.452255	0.456925	1.42358	1.26659	1.00366	0.810059	1.231	0.835557	0.699686	0.381205	0.319241	0.357313	0.645834	0.38348	0.384907	0.301971	0.143736	0.823909	0.441573	0.334431	1.41565	1.67598	0.460276	0.445045	0.611348	0.398869	0.583369	0.441714	0.684701	0.645431	0.275157	0.360056	0.772229	0.643045	0.765647	0.520013	1.19883	0.303524
11	21.125	3	1	1.26943	1.23187	0.862561	1.15568	1.12261	0.911431	0.981061	1.09627	0.825102	0.965662	1.2725	0.892657	0.978477	1.00368	1.17778	0.800328	1.4655	1.35127	1.13089	0.753814	1.04769	0.821547	1.03448	0.974761	0.273508	0.70593	0.759765	1.04245	0.693133	1.44667	1.00971	1.2597	0.865948	0.822196	1.09288	0.67776	1.03224	1.09832	0.86668	0.665128	1.27008	1.36193	1.11049	0.84562	1.01176	1.24023
11	23.25	2	1	0.582829	0.534701	0.62014	0.640793	0.511482	0.482302	0.60612	0.815198	1.30008	1.47208	0.637995	0.605454	1.13283	0.920645	0.921504	0.529132	1.20127	1.13717	0.726708	0.635957	0.71809	0.87809	0.887431	0.686269	0.117874	0.417826	0.902128	0.968463	0.775949	1.68189	0.409847	0.231062	0.775694	0.605911	0.691394	0.473143	1.01623	0.708	0.635932	0.599236	0.663767	0.646956	0.841028	1.07732	1.03488	0.521009
11	23.7	3	1	0.262083	0.276705	0.633978	0.42699	0.450746	0.939403	0.471616	0.632695	1.06764	0.498995	0.217431	0.308202	0.735446	1.00626	0.787588	0.747581	0.566042	0.513551	0.814174	1.02864	0.822364	0.82535	0.751229	0.804985	0.437386	0.0907875	1.11672	0.724185	0.427988	1.31873	0.440759	0.751582	0.890557	0.834623	0.836914	0.90286	0.590445	0.447843	0.939219	0.620707	0.228152	0.297968	0.703988	0.682598	0.686078	1.07614
12	1.55	2.25	1	0.44863	0.374544	0.136175	0.0524916	0.334842	0.189248	0.133209	0.257734	0.430329	0.194191	0.808099	0.61299	0.269279	0.31925	0.523572	0.818921	0.33927	0.314342	0.362599	0.220857	0.38694	0.25476	0.248685	0.294343	0.496708	0.28708	0.125692	0.0754839	0.253971	0.138771	0.197198	0.322506	0.456868	0.22052	0.28969	0.464321	0.699044	0.472294	0.218036	0.380982	0.334327	0.442383	0.264175	0.298436	0.418304	0.142727
12	1.775	5	1	0.821352	0.667595	0.634911	0.152274	1.1628	0.941086	1.06533	0.828705	0.849651	1.17707	0.766079	0.992834	1.03806	1.09519	1.21504	1.27439	1.11692	0.735723	0.997006	0.916359	1.39231	1.09576	1.26899	1.21643	1.28126	1.39077	1.64847	0.958617	1.62266	0.726699	0.911572	0.375254	0.810707	0.724049	1.01963	0.721546	0.899361	0.599435	1.29122	1.01362	1.11828	0.54409	1.18346	0.984164	0.551716	0.852986
12	2.6	0.0333333	1	0.560755	0.896198	0.974261	0.831255	0.433307	0.745108	0.382715	0.419739	1.05616	0.674945	1.4737	1.28886	1.3894	1.0671	1.27865	0.90234	0.712831	0.894541	0.68141	0.748119	1.08882	1.20955	0.901409	0.876572	1.72901	1.91035	0.95115	0.744366	0.974996	0.841207	0.387202	0.86058	1.18023	0.816971	1.13542	0.62612	0.903287	0.981566	0.898462	0.929245	0.67218	0.891607	0.896582	0.780943	1.03941	0.609976
12	3.2	3	1	1.06425	1.47188	1.10029	1.31997	0.68219	1.08894	0.896945	1.20515	0.731694	1.22443	1.04546	1.4293	0.777769	1.24324	0.93176	1.23693	1.25466	1.22087	0.940437	1.24735	0.99486	1.22059	1.04262	1.4402	1.26439	1.07837	0.686011	0.98219	1.59864	1.30097	0.553688	1.36692	0.656243	0.953202	0.860946	1.25053	0.774471	1.31419	1.03352	1.27263	1.12302	1.22198	1.38051	1.14938	1.026	1.27817
12	4.875	12.05	1	1.02298	1.04969	1.14928	0.735249	1.04589	0.570178	1.06503	1.46256	1.09044	0.487727	1.43144	1.05251	1.25503	1.44846	1.58859	0.948619	1.23983	0.896869	0.961877	1.12753	1.17733	0.866735	0.860707	0.909078	1.55962	0.734085	0.786965	1.28669	0.860067	0.797122	0.915453	0.672116	1.20704	0.746097	1.03032	1.01403	0.986807	1.17071	0.912405	1.30901	0.899285	1.24343	1.07661	1.17615	0.762626	0.725314
12	5.6	5.5	0	0.849213	0.647168	0.766965	0.652162	0.849709	0.589391	0.710115	0.750317	1.04347	0.426809	0.360523	0.874383	0.669899	0.648633	0.64645	0.462802	0.567382	0.247324	0.411909	0.474462	0.325365	0.564705	0.512492	0.595956	0.125467	0.295391	1.28816	1.32471	0.538727	0.35806	0.482482	0.26279	0.279697	0.644519	0.279376	0.595258	0.739549	0.656437	0.741505	0.936316	0.631536	0.836628	0.680157	0.699978	0.576828	0.923088
12	6.45	2	1	0.960641	0.854866	0.877007	0.926849	1.17867	0.905705	1.00678	0.637515	1.17248	0.313357	0.27817	0.251704	0.738031	0.493271	0.538846	0.35617	0.379225	0.286692	1.15722	0.848369	0.395239	0.586126	0.719186	0.777008	0.240645	0.281627	1.13556	0.640086	0.464616	0.737119	1.03574	0.874891	0.552066	0.80736	0.524954	0.532307	1.05115	1.0562	0.675867	0.917288	0.978705	1.10697	0.657151	0.632988	0.324782	0.774961
12	10	3.2	1	1.01019	1.20972	1.25602	1.08703	1.36625	1.00733	0.89999	0.838148	0.83266	0.595026	0.704984	0.888138	1.07005	0.540716	1.28745	1.0094	0.942865	1.29597	0.934921	0.699661	0.871271	1.07048	0.959208	1.08314	0.998313	0.815005	1.40251	0.737184	0.918885	0.63782	1.06824	0.66982	0.927567	0.966254	0.843351	0.67497	0.70508	0.691451	0.823904	0.549646	0.639223	0.731833	0.554388	0.508901	0.317549	0.599695
12	10.2	7.03333	0	0.528581	1.20997	0.300689	0.725017	0.225448	0.439761	0.58864	0.435476	0.617962	0.45039	0.719424	1.23738	0.361131	0.358519	0.884783	0.459707	0.49017	0.80405	0.55612	0.680959	0.546764	0.771053	0.525323	0.785865	0.653631	1.11207	0.499685	0.701194	0.327182	0.440277	0.277361	0.921886	0.585835	0.890163	0.736663	0.71825	0.294304	0.4161	0.562352	0.531504	0.411456	0.572415	0.402466	0.488897	0.584692	0.3661
12	10.75	6.66667	1	0.665182	0.749741	0.70588	0.366458	0.463682	0.5019	0.311295	0.309796	0.407527	0.615227	0.437399	0.532588	0.500545	0.148389	0.357868	0.319457	0.365091	0.465014	0.459104	0.577433	0.549904	0.748177	0.558038	0.926066	0.590711	0.604701	0.278675	0.500124	0.210004	0.103481	0.507913	0.629397	0.8665	1.08749	0.603878	0.819388	0.779413	0.772294	0.463456	0.59912	0.535842	0.636047	0.554001	0.58548	0.301216	0.534892
12	11.425	0.75	1	1.36268	1.33798	1.34706	1.54811	1.05138	1.51074	1.46649	0.89435	0.803429	0.967707	0.878976	1.07377	0.916932	0.939343	1.19263	1.2967	1.3187	1.41666	1.48088	1.231	1.10765	1.32575	1.53722	1.39203	1.9175	1.52166	0.943649	1.11003	1.13467	0.729115	0.571084	1.19295	1.27582	1.18746	1.23746	1.1447	1.26594	1.06355	1.31318	1.11591	1.26424	1.16934	0.799461	1.26402	0.794076	1.07917
12	12.825	3.25	0	0.8349	0.953408	0.758845	0.762675	1.15006	1.46233	1.52069	1.50331	1.35611	1.51724	1.36781	1.39897	1.24758	1.41389	0.979975	1.58395	1.4586	1.72983	1.28148	1.25495	1.57909	1.41622	1.16995	1.27146	0.710453	1.52265	1.15393	0.908654	1.56555	1.13894	1.19051	0.905199	1.14325	1.36237	1.31258	1.0197	0.972562	0.803458	1.45886	1.29348	1.19201	1.03712	1.21016	1.15081	0.953776	1.36188
12	14.15	0.833333	1	0.668927	0.736899	0.306421	0.586043	0.439776	0.430483	0.809877	0.724462	0.622573	0.706303	1.11035	0.896857	1.25873	0.937486	0.910016	0.975744	0.892811	0.739294	0.637784	1.12005	0.768665	0.530227	0.450982	0.37533	1.5286	0.350099	0.302136	0.783834	0.99207	0.716645	0.525199	0.390556	0.845324	0.813612	0.967103	0.711033	0.878059	0.88369	0.713793	0.934016	0.677861	0.827134	0.556174	0.739864	1.07088	1.16888
12	15.025	0.75	1	0.608106	0.846677	0.891564	0.639351	0.919464	0.575937	0.716354	0.389909	0.484596	0.888579	0.581988	0.343756	0.758372	0.453907	0.37552	0.497617	0.511867	0.467736	0.602457	0.916656	0.528468	0.410544	0.42549	0.403337	0.478597	0.292324	0.939924	0.300569	0.907082	0.530937	0.638477	1.05267	0.646857	1.13613	0.40222	0.652777	0.674635	0.874381	0.468331	0.595424	0.689566	0.500724	0.520309	0.471661	0.376297	0.256188
12	15.75	6	1	0.962753	0.83061	1.36746	1.64155	1.60657	1.26107	1.41753	1.44915	1.10816	1.53199	0.929488	1.5747	1.5084	1.63364	1.08447	0.742569	1.38409	1.05198	1.28265	0.95511	1.18541	1.21448	1.01844	1.0161	0.492155	1.52711	1.38703	1.28278	1.14328	1.25367	1.64239	1.35845	0.770442	1.20513	0.959997	0.62023	1.40923	1.33253	0.806981	1.26244	1.45387	1.41543	1.42715	1.46174	1.24471	1.26236
12	16.55	3.75	0	0.496931	0.884673	0.392505	0.304183	0.371564	0.48404	0.338458	0.425972	0.6052	0.603534	0.796871	1.1546	1.01675	0.97445	1.00738	1.46357	0.598447	0.746312	0.230496	0.708631	0.391222	0.625124	0.766687	0.814385	0.124597	0.154619	0.297234	0.364731	0.596662	0.971445	0.357885	0.59586	0.354504	0.421196	0.413774	0.62424	0.68457	1.07244	0.419524	0.775569	0.57681	0.954661	0.803718	0.908651	0.466272	0.881684
12	17.175	0.416667	0	1.52189	1.42713	1.54278	1.47137	1.21379	1.12031	0.788396	0.727371	0.562139	1.35674	0.963012	0.967172	0.697215	0.957426	1.0425	0.283463	1.03049	0.492102	0.748587	0.936034	0.917794	0.830716	0.867936	0.866898	1.38097	0.240153	0.811322	1.02964	0.526224	1.25882	1.49301	0.782175	1.51248	1.33114	1.35014	1.18524	1.32171	1.47943	1.37509	1.0833	0.83144	0.79068	1.33738	1.12336	1.0073	0.790533
12	19.5	8.5	1	1.39965	1.15348	0.952928	1.01211	1.61287	1.12803	1.27169	1.03275	1.07823	0.792229	0.429148	0.564436	0.60463	0.782263	1.14727	0.502029	0.565257	0.810603	1.08471	1.21674	0.970813	1.14596	1.35122	1.34993	0.525717	0.999801	1.32834	1.08857	0.681352	0.627401	1.37435	0.712857	1.01506	1.0791	0.878409	0.770509	1.51708	1.29414	1.11354	0.915982	1.15943	1.35219	1.19401	1.0909	0.840177	1.1154
12	19.65	0.233333	1	0.864991	0.977081	0.590376	0.479904	0.433638	0.48907	0.383199	0.657376	0.415709	0.208123	0.46596	0.538841	0.522881	0.689972	0.42743	0.539386	0.723667	0.714588	0.537852	0.545429	0.610241	0.5444	0.727619	0.558284	0.536849	0.347049	0.553215	0.494652	0.512511	0.240115	0.804604	0.426867	0.657142	0.556348	0.671571	0.643937	0.95365	0.701741	0.421986	0.608235	0.475197	0.381858	0.391691	0.435661	0.381326	0.622786
12	20.2	8.5	0	1.16363	0.861517	1.08344	0.83481	1.52648	1.32926	1.15688	0.871678	1.07702	0.536731	1.14385	1.19842	1.27099	1.06263	1.30359	0.728405	0.519014	0.764368	0.722167	0.920395	0.831932	0.906307	1.21135	1.18912	1.39424	1.05963	1.13192	1.46245	1.01507	1.22596	1.33342	0.703514	1.14492	1.40544	1.25818	1.29644	0.984184	1.0139	1.36863	1.09246	1.07894	1.28772	1.58682	1.27743	1.5521	1.35981
12	20.525	3.5	0	0.833886	1.27548	0.894495	1.50055	0.344758	0.59685	1.17913	0.944422	0.411083	0.646444	1.04914	1.49043	1.06501	0.976593	1.21335	0.755304	0.769076	0.466169	0.887762	0.879374	0.736715	0.816709	0.970831	1.04593	1.36632	1.4394	0.28339	1.43683	0.376882	1.03242	0.399484	1.32914	1.14436	0.663792	0.747446	0.884031	1.01091	0.871097	0.949987	0.895068	1.03414	0.936978	0.860801	1.05288	0.676777	0.826957
12	21.125	0.75	1	0.96918	1.07723	1.3483	0.639374	1.0985	0.526943	1.07019	0.658866	0.989366	0.93012	0.699546	1.06106	1.31447	0.951261	1.04937	0.958888	0.566146	0.871112	0.785764	0.776771	0.655393	0.773151	1.02498	0.993773	1.36782	0.962986	0.405726	0.746544	0.952763	0.698986	0.784694	0.717795	0.680888	0.619437	0.909239	0.90212	0.895351	1.10158	0.892468	0.726576	0.773414	0.812542	0.77929	0.841439	0.357357	0.849124
12	23.25	4.33333	0	1.55598	1.08384	1.69599	1.5951	1.83284	1.40107	1.15223	1.59396	1.21698	1.37799	1.06208	1.15878	1.35555	1.66036	1.7055	0.892255	1.08369	1.18181	1.29359	1.2912	1.54099	1.58125	1.59678	1.60872	0.757565	0.99003	1.78654	1.31284	1.60964	1.76178	1.82937	1.42464	1.43653	1.38337	1.42153	0.996326	1.49293	1.11591	1.58523	0.903234	1.49961	1.24	1.53233	1.69299	1.54146	1.30497
12	23.7	0.75	1	1.61425	0.686248	1.29844	0.764065	1.77222	1.40094	1.38751	1.71835	1.34943	1.25044	1.58876	1.64374	1.22106	1.68374	1.06341	1.81119	1.43846	1.40758	1.39367	1.31041	1.14378	1.47895	1.43057	1.70523	0.839126	1.74062	1.2729	1.19747	1.57128	1.61319	1.81831	1.23823	1.55981	1.53364	1.23188	1.14526	1.60603	1.27611	1.57028	1.45073	1.43694	1.39997	1.38316	1.47099	1.72502	1.3886
13	1.55	3	1	1.2489	1.4006	0.683684	0.924885	0.639446	0.716227	0.530276	0.778891	1.09532	0.984564	0.716584	0.553825	1.0641	1.04132	1.3011	1.16276	0.904199	0.549143	0.875833	1.03392	0.809669	1.1403	0.851847	0.564231	NaN	NaN	0.951463	1.0756	1.08187	1.13456	1.59051	1.35507	1.07186	0.937049	1.27112	0.961824	1.26751	0.922715	1.40712	1.12658	0.940932	0.899028	1.26098	1.19171	0.581281	0.770723
13	1.775	1.5	1	0.922452	1.0752	0.635568	1.02511	0.337127	0.641164	1.21136	0.789679	0.669904	1.23637	0.844002	1.3637	0.905217	1.11037	1.25505	1.61786	0.904514	0.830588	0.816551	0.780568	1.19392	0.997497	0.763553	0.494551	NaN	NaN	0.756003	0.45533	1.01291	1.24835	0.487782	0.81261	0.762375	0.760416	0.744835	0.721265	1.28423	1.12826	0.632837	0.467088	1.11602	0.74707	0.735477	0.484779	0.440169	0.701639
13	2.6	5	1	1.65169	1.38707	1.66525	1.46124	1.25663	1.20255	1.20063	0.99646	1.37204	1.32451	0.849206	0.42761	1.06119	1.10197	1.69869	1.49225	1.56129	1.04439	1.34756	0.973038	1.11832	1.32025	1.16022	1.10386	NaN	NaN	1.24734	1.22385	1.34603	1.16399	1.39039	0.977688	1.19684	0.907885	0.999229	0.73134	1.33266	0.964526	1.62431	1.15614	1.39917	1.29415	1.12796	1.13411	0.836923	0.731709
13	3.2	3	1	1.30318	1.12413	0.713226	0.668166	1.33395	1.05193	0.676976	0.677301	0.767147	1.4695	0.532858	0.753566	0.488921	0.5086	0.657888	0.255564	0.44197	0.411749	0.819009	0.381537	0.566856	0.573105	0.588915	0.446856	NaN	NaN	0.678872	0.351163	0.575685	0.479832	1.26908	1.32157	0.827495	0.848929	0.891344	0.491172	0.798075	0.812572	0.678001	0.532691	1.06117	0.758422	1.08294	0.766436	0.56586	0.578767
13	4.875	1	0	1.06012	0.759466	1.30681	1.29296	0.85099	1.12407	1.22897	1.52914	0.929013	1.32824	1.2825	1.03125	1.1304	0.981371	1.05269	1.20428	0.595158	1.06145	1.6028	1.58207	1.29307	1.45921	1.22873	1.27315	NaN	NaN	1.22083	0.943721	1.09751	1.27787	0.687936	0.927785	0.73985	1.22785	0.78606	0.915844	0.911286	0.711391	1.06649	1.19287	1.20103	1.16837	0.84976	0.929505	0.815303	0.860785
13	5.6	3	0	0.591885	0.736586	0.764844	1.24596	1.19012	0.879336	1.14531	0.988743	1.15085	0.634751	1.10714	0.908667	0.750352	1.11181	1.46247	1.33875	1.22752	0.908672	1.46849	0.871504	1.41203	1.09306	0.82321	0.898459	NaN	NaN	0.864936	0.909052	1.10985	0.65669	0.892806	0.634055	1.38886	1.36558	1.32806	1.30488	1.19052	1.06977	1.18552	0.807972	1.07966	0.683548	1.08288	0.991922	1.3914	0.468268
13	6.45	1	1	0.63459	0.654202	0.606335	0.515932	0.535446	0.723624	0.967527	1.44424	1.08038	0.768971	1.04967	1.38893	1.18735	1.40302	1.82243	1.53862	1.33567	1.48516	1.00237	1.32959	1.13559	1.26023	1.36997	1.31203	NaN	NaN	0.747332	1.22799	1.23989	1.48263	0.695916	1.16141	1.03762	1.1037	1.0421	1.15918	0.813729	0.837407	0.72254	0.863856	0.879435	1.13862	0.654907	0.878972	0.78148	1.04953
13	10	2	1	0.312684	0.587574	0.613514	0.918006	0.650143	0.531627	0.702374	0.691509	0.563338	1.06212	0.806764	0.825422	0.710288	0.758303	0.957215	0.614568	0.65448	0.608041	0.610782	0.415636	0.688633	0.646453	0.601531	0.471631	NaN	NaN	0.518611	0.587661	0.753522	0.500906	0.630145	1.10896	0.540755	0.505972	0.818373	0.667997	0.722507	0.494645	0.581347	0.349277	0.636563	0.230212	1.1311	1.3122	0.802815	1.04629
13	10.2	3	1	1.03134	0.749438	0.664556	0.844135	1.05515	0.919021	0.952634	1.35845	0.527046	1.1998	0.833791	1.08014	0.570721	0.83169	0.85897	0.370911	0.436885	0.686472	0.82213	0.415464	0.807356	0.332509	0.705874	0.48903	NaN	NaN	0.794498	0.56147	0.452931	0.460629	0.882137	1.26812	0.52047	0.599987	0.804928	0.765535	0.620841	0.397855	1.04068	0.54801	1.03476	0.373206	0.909604	0.858487	1.21423	0.925932
13	10.75	2	1	0.988523	0.96701	0.885257	1.11519	1.22204	0.798818	1.07109	0.89244	0.848423	0.690173	0.915997	1.05997	0.883984	0.647181	0.942942	0.38463	1.13543	0.904441	0.666175	0.496196	0.818085	0.393739	1.03023	0.509613	NaN	NaN	0.961777	0.594571	0.602916	0.735389	1.10045	0.781838	0.818854	1.15471	0.593778	1.08365	0.985624	0.672153	1.11656	0.850571	1.00734	0.822	1.00966	0.968745	0.637331	0.458445
13	11.425	1	1	0.565038	0.504006	0.852345	0.905184	1.58705	1.43817	1.37578	1.04001	1.1809	1.08884	1.01177	1.21043	1.47807	1.32446	1.44586	0.97764	0.9439	0.621512	1.23282	0.761539	1.03168	0.677705	0.985888	0.845924	NaN	NaN	0.726258	1.03271	1.04497	0.711344	1.43811	1.06763	0.963882	1.05555	1.09793	0.895198	0.785065	0.886127	1.2642	0.922266	0.963342	0.772944	0.958944	0.86047	1.16004	0.98978
13	12.825	2	1	0.792027	1.01804	1.62099	1.5561	1.20114	1.25456	0.410367	0.452017	0.619712	0.72983	0.433587	0.331775	0.552829	0.93367	0.587042	0.491659	0.707841	0.941823	0.668621	0.7311	0.763063	0.787488	0.635198	0.969209	NaN	NaN	0.785438	0.660445	1.16579	0.896018	1.15923	1.04747	0.578627	0.838722	0.655891	0.789531	0.719084	1.028	0.830924	1.07464	0.866574	1.11911	0.603401	0.776605	1.10209	1.13887
13	14.15	3	0	1.2073	1.13424	1.65413	1.38153	1.04271	1.12813	0.54059	0.388836	0.88115	1.21207	0.24403	0.376851	0.545154	0.621823	0.44489	0.965979	0.455176	0.301341	0.83483	1.05059	0.606773	0.580058	0.590577	0.972546	NaN	NaN	1.04502	0.892617	0.707187	1.13873	1.34206	0.966777	0.906131	0.828014	0.999302	0.774025	1.34285	1.03589	0.678245	0.560229	0.932055	0.92325	1.05861	0.723808	1.19643	0.643968
13	15.025	1	1	1.00191	0.996037	1.01972	1.23619	0.845408	0.922198	0.453433	0.212966	0.654841	0.650988	0.559204	0.242307	0.367061	0.54792	0.572145	0.582393	0.930429	0.935917	1.10777	0.77331	1.06814	0.697384	0.950439	0.772256	NaN	NaN	0.738004	0.540679	0.881264	0.903281	0.509326	1.0032	0.884829	0.809115	0.788438	1.06474	0.939555	0.688398	0.868716	1.07911	0.870482	0.679891	0.581517	0.829915	0.528131	0.997666
13	15.75	0.5	1	1.52543	1.48154	1.09923	1.16812	1.07852	1.40592	1.52615	1.61282	1.69702	1.06392	1.46309	1.42244	0.982524	1.35612	0.808214	1.24847	1.4331	1.5252	1.22222	1.16036	0.913925	1.29654	1.00538	1.30934	NaN	NaN	0.831085	0.906498	1.12169	1.29825	0.579896	1.03344	1.01435	1.23321	1.08831	1.01949	1.56395	1.3663	1.05337	1.23752	1.55013	1.45033	0.912601	1.05897	1.54513	1.0046
13	16.55	2	1	0.801527	0.923547	0.946028	1.09544	0.620412	0.837185	1.68442	1.73166	1.44581	0.799421	1.46781	1.25316	1.0913	1.39213	1.08552	1.2786	1.2692	1.27059	0.515896	1.16862	0.725633	1.1294	0.789636	1.03837	NaN	NaN	1.35615	1.4862	1.31235	1.43487	0.921647	0.688768	0.937059	1.42932	0.821224	1.28919	0.644669	0.717954	0.683506	1.07105	0.511086	0.838683	0.976469	0.979046	0.764037	1.01033
13	17.175	1	1	0.722503	0.891163	0.905444	1.34449	0.863398	1.02581	1.12295	1.29108	1.07648	0.756338	1.26379	1.03424	1.06322	0.915501	0.799005	0.731598	0.846655	0.86414	1.0204	0.977477	0.933085	1.09993	0.713017	0.987048	NaN	NaN	0.666486	0.963259	0.911579	1.26441	1.13212	1.00103	0.881985	0.859695	0.444715	0.847838	0.620854	0.758645	1.12378	0.857592	0.670496	0.966544	1.09788	1.27787	0.752367	1.30959
13	19.5	0.5	1	1.07561	0.950004	0.876661	0.732516	0.62294	0.855627	0.653772	0.445692	0.822518	0.759976	0.754987	0.685637	0.753283	0.407083	1.31106	0.573249	0.834482	0.597027	0.868877	0.696884	1.2289	0.784201	0.80762	0.831046	NaN	NaN	0.82278	0.830803	0.765958	1.12086	0.538922	0.593183	0.736951	0.740806	0.39512	0.618568	0.359811	0.382332	0.536669	0.615683	0.848098	0.76999	1.03507	0.697693	0.844822	0.385991
13	19.65	0.75	1	0.949179	0.830979	0.387185	0.543487	0.574116	0.926671	0.738407	0.537128	0.623922	0.607547	0.961084	1.11392	0.464226	0.452609	1.18054	0.427361	0.922973	0.507567	0.736271	0.429052	1.10992	0.705412	0.8587	0.961214	NaN	NaN	0.485362	0.506297	0.600369	1.02448	0.719608	0.603731	0.604335	0.72563	0.661509	0.846436	0.871283	0.819064	0.848805	1.04856	0.810343	0.686307	0.429849	0.644666	0.466557	0.225427
13	20.2	0.5	1	0.347547	0.387382	0.795972	0.842627	0.630784	0.685192	0.449715	0.412588	0.444605	0.56204	0.253459	0.322522	0.639258	0.378068	0.487684	0.393127	0.916504	0.206357	0.226999	0.623387	0.667278	0.574636	0.565144	0.694376	NaN	NaN	0.859371	0.756411	0.458161	0.780916	0.659503	0.882817	0.444829	0.719437	0.773287	0.810202	0.82819	0.990427	0.953561	0.824531	0.515172	0.755861	0.667548	0.680267	0.896247	1.2871
13	20.525	0.75	1	1.5364	1.59497	1.51031	1.66815	1.47086	1.42045	0.905337	1.20217	0.56676	1.05932	1.09928	0.781403	0.889687	0.63816	0.833692	0.357568	1.2795	1.0596	1.20166	1.24456	1.19343	1.0392	1.25828	1.3325	NaN	NaN	0.466946	0.887016	1.20715	1.14138	1.18228	1.2943	0.901078	0.778342	1.18785	0.822999	1.34597	1.54513	1.18396	1.02819	1.28365	1.41509	0.670744	0.767197	0.549407	0.991278
13	21.125	1	1	1.30852	1.31086	1.24301	1.08298	0.931384	1.3669	1.23584	1.32884	1.10952	1.0053	0.616582	0.775352	0.855114	0.488623	1.34028	0.797304	1.11017	1.02049	1.15782	1.22007	1.12989	1.12259	0.732635	0.72399	NaN	NaN	1.20628	1.0946	0.902676	0.821127	0.934287	1.02888	0.763659	1.02041	0.892045	1.07565	1.23042	1.14288	1.19158	1.27143	0.943239	1.47398	1.07028	1.02463	1.39464	1.51146
13	23.25	0.5	1	1.13359	1.32273	1.28787	1.12896	1.53223	1.61142	0.762356	1.23595	1.20147	1.14892	1.58135	1.06191	1.45144	1.49939	1.55637	1.36051	1.30659	1.26202	0.940395	1.52983	1.25457	1.45494	1.37606	1.46434	NaN	NaN	0.935025	0.909117	1.08705	1.17954	1.49307	1.43231	1.44879	1.21025	1.03562	1.08545	1.28932	1.61979	1.39175	1.548	1.47609	1.55429	1.04145	1.33562	0.762867	0.989726
13	23.7	1	1	0.67376	0.956443	0.859344	1.3445	1.1627	0.93827	0.720345	0.924131	1.19212	1.137	1.07877	0.956206	0.869224	1.33659	0.887187	0.917079	0.544792	0.994017	0.563827	0.77151	0.63754	1.0359	0.995275	0.987289	NaN	NaN	0.920574	0.659695	1.10569	0.968339	1.46241	1.17255	0.885845	0.843125	0.911637	0.90705	0.865964	0.981084	0.78081	0.684072	0.755996	0.724862	0.748464	0.940622	1.00586	0.590327
14	1.55	3	0	1.4504	1.27213	1.1693	1.47222	1.30958	1.09373	0.80133	0.858674	1.23183	1.17304	0.953734	1.38352	0.768893	1.09056	NaN	1.36202	1.21458	1.26218	1.09222	1.37387	0.699165	1.1725	1.08648	1.07986	NaN	NaN	1.00494	0.68154	1.11664	1.20741	0.9838	1.03256	0.916961	0.835827	1.03133	0.907962	1.3055	1.06268	1.32481	1.11247	1.22115	1.19204	0.654285	0.580691	1.36227	1.06899
14	1.775	2	1	1.07068	1.30254	1.49592	1.65999	0.867242	1.13687	1.07206	1.51557	0.76877	1.25094	1.39257	1.50968	0.924307	1.05713	NaN	0.811548	0.730897	1.07219	1.19201	0.898156	0.746442	0.982958	0.923303	1.03224	NaN	NaN	0.735816	0.845415	1.41343	1.06659	1.02904	0.852729	0.933985	0.965664	0.716558	1.07447	0.725124	0.944161	1.1053	1.03005	1.15354	0.770247	0.77892	0.677336	0.775593	1.25515
14	2.6	1.5	1	1.25376	1.55782	1.02495	1.04437	1.29376	0.945904	1.12112	1.07233	0.961287	0.482174	0.810749	0.744439	1.02238	0.743538	NaN	1.33763	0.844134	1.15512	1.07037	1.08807	0.700643	0.649719	0.984439	0.893776	NaN	NaN	0.404207	0.834538	0.772532	0.82278	1.08456	1.33451	1.05659	1.1858	1.41606	1.33621	0.912182	0.877143	1.5082	1.01346	1.33829	1.11638	1.24319	0.991755	1.59472	1.11329
14	3.2	1	0	1.21461	1.09706	1.61031	1.50188	1.40807	0.945394	0.508388	0.3191	0.611387	0.291212	0.31611	1.02449	0.397772	0.667507	NaN	1.48345	1.21973	1.31531	0.979371	1.14557	0.768574	1.18298	1.11842	1.07653	NaN	NaN	1.25558	1.09714	1.29375	0.877407	1.42732	0.953369	0.731646	0.611323	0.803224	0.591722	0.62613	0.5947	0.96247	1.0629	0.697743	0.799484	1.0517	1.04326	1.14542	1.33067
14	4.875	2	0	0.624052	0.401761	0.713752	0.784614	0.76074	1.15095	0.482967	1.33689	1.36845	1.10646	0.833239	0.728928	1.08853	0.907448	NaN	0.453107	0.736579	0.553293	1.17963	0.915386	0.703516	0.505614	0.648878	0.607713	NaN	NaN	0.460529	0.832224	0.503916	0.821256	1.13522	1.22741	0.995067	0.838636	1.14777	1.13708	0.779676	0.688823	0.869153	0.799878	0.674595	0.846132	0.497143	0.782196	0.786591	0.561496
14	5.6	1	0	1.40678	1.43472	1.54278	1.38954	1.17829	1.41932	0.749523	0.677444	1.21753	1.11304	1.10269	1.02545	1.31166	1.2674	NaN	1.01923	0.987024	1.12545	1.4095	1.19504	1.61824	1.56847	1.04774	1.11611	NaN	NaN	0.615513	0.816183	1.19509	1.50852	1.3817	1.08067	0.92805	0.862805	0.774898	0.694368	1.26036	1.44433	1.07026	1.01098	1.42126	1.2389	0.879509	0.976537	0.788337	1.00276
14	6.45	2	1	1.29591	1.00323	0.824639	1.28877	0.898196	0.959836	1.60743	1.20223	1.14058	0.682876	1.7471	1.13621	1.57267	0.573546	NaN	0.711306	1.25789	1.43943	1.04246	0.776283	1.4679	1.47492	1.0029	1.35403	NaN	NaN	1.05383	0.759729	1.40633	0.962198	0.331265	0.789302	0.750265	0.778981	0.722307	0.542494	0.922972	1.01148	0.645723	0.74167	1.14126	0.941034	0.676732	1.31718	0.899621	1.4499
14	10	3	0	1.00302	0.863674	0.815046	0.401422	0.649729	0.626103	0.617915	0.517605	0.517674	0.573472	0.157368	0.499248	0.347083	0.978966	NaN	0.371419	0.516329	0.921634	0.683894	0.744198	0.662208	0.741053	0.47884	0.72012	NaN	NaN	0.623524	0.814787	0.392672	0.843078	0.710822	0.702574	0.552387	0.58256	0.367198	0.529761	0.420951	0.625266	0.727949	1.1488	0.531818	0.714205	0.504137	0.800389	0.533386	0.607683
14	10.2	4	1	0.806512	0.846835	0.807862	0.70249	0.54022	0.387856	0.330552	0.623905	0.572032	0.633758	0.251808	0.448903	0.512633	0.665237	NaN	0.774785	0.820225	0.875636	0.589795	0.772552	0.539221	1.0651	0.624048	0.621036	NaN	NaN	0.652443	0.678189	0.887615	0.973292	0.893461	0.67839	0.557142	0.474305	0.893314	0.899604	0.55433	0.746124	0.683377	1.14393	0.629067	0.723873	0.463559	0.440217	0.428948	0.653965
14	10.75	3	0	0.635522	0.814762	0.948853	1.06668	0.963984	0.948592	0.715259	0.538809	0.935293	0.65638	0.408253	0.875599	0.456921	0.966228	NaN	0.406823	0.700146	0.779824	0.430068	0.471631	0.501896	0.551129	0.82593	1.12929	NaN	NaN	0.590797	0.801836	0.492143	1.05386	0.657539	0.614853	0.85266	0.639454	0.754576	0.601158	0.611333	0.588991	0.795978	0.693304	0.534964	0.544845	0.439001	0.443119	1.08766	1.20947
14	11.425	1	0	1.21825	1.31926	0.691841	1.10799	0.934361	0.660424	0.691687	1.11784	0.667403	0.88386	0.603904	1.158	0.639373	1.27222	NaN	0.793788	0.791009	0.989915	0.799765	1.07398	0.755235	1.11905	0.890129	1.00258	NaN	NaN	0.81394	0.938638	1.24717	1.24844	1.48247	1.23023	0.790858	0.998962	0.892983	1.09261	1.09198	1.18234	0.703245	0.956203	1.06771	1.24089	0.714356	0.801666	0.91903	0.887689
14	12.825	7	0	1.29204	0.892474	0.681556	0.645368	1.16506	1.10647	0.92444	0.470973	0.753664	0.293575	0.837493	1.43436	0.818136	0.921094	NaN	0.744851	1.30725	0.755451	0.986938	1.04624	0.805851	0.829022	1.07695	1.18115	NaN	NaN	0.894092	0.68776	1.38038	1.4308	0.787816	0.915329	0.832019	0.840804	1.02558	1.06534	1.19187	1.03654	1.13782	0.780858	1.24297	0.884841	0.713982	0.731622	0.782951	1.12824
14	14.15	2	1	0.890372	0.829279	1.26461	1.14623	0.854611	0.850145	0.901198	0.860327	0.792596	0.682742	1.15016	0.685491	1.0614	0.869041	NaN	0.280598	0.592568	0.684483	0.891658	0.693925	1.33047	0.768888	0.978281	0.963681	NaN	NaN	0.703335	0.820995	1.21639	0.826446	1.2989	0.927587	0.852954	0.786826	0.916966	0.988065	0.901869	0.677214	0.84691	0.977015	1.14878	0.789553	1.21025	0.950591	0.732616	1.22134
14	15.025	1.5	1	0.86522	0.609273	1.06346	0.807092	0.931969	0.620051	1.2477	1.49051	0.85271	1.45139	1.21776	1.41871	1.2736	0.956717	NaN	0.990048	0.949179	0.80606	0.803714	0.857117	0.815091	1.01593	1.04123	0.731656	NaN	NaN	1.22483	1.17103	1.19015	1.21526	0.983585	1.00316	0.603531	0.659038	0.728466	0.631267	1.12657	0.858918	0.914215	0.542904	0.531117	0.770925	0.953316	0.84051	1.02345	0.584257
14	15.75	3	0	1.05086	0.80123	0.509921	0.392549	0.92358	0.865193	0.935685	0.830958	1.15572	0.989942	0.518013	0.434921	0.765093	1.29935	NaN	1.33285	0.686018	1.11482	0.92439	0.904717	0.638758	0.997214	0.820453	0.963797	NaN	NaN	1.3156	1.16542	0.746214	0.531774	1.18832	0.830878	0.935857	0.960666	0.926036	0.869884	0.762935	0.691406	0.696478	0.693088	0.644382	0.722242	0.991056	0.590748	1.46612	0.836239
14	16.55	3	1	0.642562	0.802608	0.887902	0.807717	0.895091	0.612352	0.777669	1.0302	0.800588	1.12022	1.34751	1.51169	1.00932	1.32303	NaN	0.822008	1.22672	0.957713	0.936368	1.34578	0.913885	1.1101	1.0328	1.27269	NaN	NaN	0.918413	0.953094	1.48924	1.61031	0.751369	1.11804	0.902808	0.695664	0.861375	0.985409	0.471026	0.689196	0.851238	1.05218	0.628807	1.19642	0.63157	0.566496	0.822379	0.557349
14	17.175	1	0	0.922813	0.755672	0.382646	0.993114	1.43024	1.00587	1.27542	1.29178	0.901621	1.0146	1.39288	1.25918	0.704516	1.1725	NaN	0.457495	0.660353	0.593275	0.941807	1.08036	0.826968	0.618107	0.672996	0.943111	NaN	NaN	1.18132	0.869768	1.19498	0.790969	0.654575	0.810388	1.01707	0.928882	1.11634	0.83742	1.16756	0.582152	0.683602	0.807703	1.13979	0.618547	0.88595	0.949506	0.351459	0.834199
14	19.5	6	1	0.738469	0.748649	0.995574	1.3432	0.937483	0.876035	0.835213	0.508206	1.21192	0.702284	1.15061	1.05554	0.675232	1.13934	NaN	0.813816	0.572501	0.740129	1.01474	0.880664	0.797045	0.908593	0.825799	0.836028	NaN	NaN	1.27191	1.35156	0.893405	0.893803	0.72976	1.23772	1.06401	1.07295	0.97567	1.06881	0.830904	0.897736	0.829978	1.06646	0.598632	1.03597	0.805217	0.877082	0.669972	1.40609
14	19.65	3	0	0.962511	1.03248	1.22117	0.77394	0.779851	0.889689	0.913468	1.02442	0.993961	0.987394	0.565437	0.815069	0.348411	0.676029	NaN	0.19128	0.739364	0.360099	0.836145	1.04695	0.521186	0.531461	0.681127	0.77391	NaN	NaN	0.386796	1.14545	0.381404	0.882509	1.12501	0.851717	0.797075	0.734255	0.789262	0.928642	0.755856	1.05701	0.845878	0.775848	0.979529	0.865211	0.673939	0.779116	0.898117	0.660186
14	20.2	2	1	1.60209	1.66458	1.41291	1.20454	1.74623	1.37597	1.23797	1.35033	0.971543	1.05993	0.874305	1.13303	1.27122	1.13638	NaN	1.01022	0.892759	0.914079	1.44465	1.24534	1.22055	1.36388	1.48469	1.31952	NaN	NaN	1.53385	1.62077	1.59676	1.40515	1.49518	1.42211	1.37892	1.14376	0.980921	1.23934	1.09947	0.998405	1.12496	1.54903	0.936417	1.15495	1.28491	1.35849	1.33253	1.22853
14	20.525	2	1	0.803459	1.07015	0.856332	1.12631	0.680027	0.935602	0.346375	0.558434	0.828775	0.885045	0.460335	0.64097	0.989838	0.796407	NaN	0.130757	0.784373	0.486672	0.429068	0.836411	0.497782	0.603895	0.385867	0.753334	NaN	NaN	0.626495	0.873136	0.491177	1.13195	0.346665	0.715958	0.551189	0.348518	0.414142	0.310456	0.728054	1.13019	0.367231	0.685447	0.184345	0.92781	0.350105	0.414645	0.273772	0.31875
14	21.125	1	1	0.870935	1.02963	0.714787	0.581547	1.09075	0.587592	0.676684	0.405107	0.534285	1.19737	0.390384	0.436016	0.470336	0.55768	NaN	0.328562	0.944855	0.674758	0.752353	0.664301	0.900077	0.422368	0.581695	0.624107	NaN	NaN	0.628588	0.824119	0.4825	0.748946	0.523181	0.546111	0.673183	0.669243	1.01183	0.893828	1.2304	0.946358	0.819439	0.639716	0.702294	1.08583	0.779219	0.832526	0.704056	1.17154
14	23.25	2	1	1.65008	1.4959	1.75254	1.25061	1.59499	1.52269	1.50512	1.16577	0.788669	0.982662	1.59355	1.369	0.955554	1.11927	NaN	1.36159	0.869541	1.3029	1.20245	0.977984	1.03876	1.06683	1.26664	1.17125	NaN	NaN	1.41406	1.18121	1.23563	1.44658	1.39715	1.19262	1.01216	1.00401	1.01313	0.957381	0.870212	1.05573	1.19025	0.843347	0.930431	0.963642	1.36431	0.881494	1.31712	0.408509
14	23.7	0.5	1	0.895346	0.790566	1.17798	1.33391	1.18669	1.0996	1.23312	0.971569	0.976267	0.974157	1.1641	0.647111	1.19112	1.27523	NaN	1.29202	0.969792	0.880987	1.17083	1.09422	0.857761	1.16745	1.25153	1.07511	NaN	NaN	0.776443	0.776249	1.13541	0.745703	0.956697	0.748944	0.919364	0.884492	1.02566	0.916252	1.12135	0.523186	1.21731	1.00454	1.0366	0.864145	1.09596	0.954371	1.33422	0.937893
15	1.55	12	1	0.461873	0.411016	0.792429	0.369721	0.686827	0.738095	0.321487	0.218605	1.48693	0.744505	0.302748	0.320034	0.304547	0.163781	0.218399	0.621497	0.31915	0.3153	0.422864	0.384823	0.500109	0.705332	0.565314	0.356072	NaN	0.268158	0.490267	0.364796	0.353395	0.339709	0.433876	0.431638	0.610428	0.355165	0.542459	0.361832	0.412607	0.286367	0.813931	0.20771	0.781918	0.208655	0.221641	0.302552	0.873209	0.180806
15	1.775	5	1	0.395146	0.429793	0.539383	0.639054	1.26859	1.05885	0.704091	0.419788	1.62467	1.40151	0.753663	1.39518	0.552556	0.301715	0.670709	0.314446	0.415945	0.683905	0.41614	0.194474	0.357743	0.576998	0.787807	0.645512	NaN	0.934544	0.729575	0.482703	0.748628	1.19613	0.531889	0.513699	0.581797	0.296586	0.394315	0.204239	0.693191	0.480381	0.25642	0.257169	0.891708	0.355713	0.519712	0.349586	1.11752	0.297308
15	2.6	5	0	0.732944	0.584815	0.582792	0.619998	1.25544	0.827138	0.67422	0.530524	1.21703	0.928323	0.295062	0.485116	0.401607	0.295119	0.749855	1.06275	0.707982	0.850117	0.896959	0.860587	0.63871	1.02289	0.494855	0.469051	NaN	0.143883	0.920748	0.552276	0.62824	0.390163	0.892699	0.482358	0.676779	0.175138	0.350877	0.248426	0.946634	0.539731	0.524775	0.271909	0.486304	0.409445	0.348529	0.299758	0.261203	0.158688
15	3.2	2	1	0.595703	0.391629	0.389505	0.313615	0.466275	0.255801	0.277473	0.219915	1.11339	1.02398	0.187307	0.499137	0.237493	0.197393	0.209519	0.277944	0.335881	0.290517	0.213437	0.325724	0.187341	0.297656	0.337448	0.246364	NaN	0.184332	0.50978	0.550467	0.549301	0.580074	0.581566	0.232641	0.551037	0.433814	0.797267	0.25655	0.247785	0.279215	0.422725	0.248916	0.249638	0.224371	0.240234	0.26509	0.222816	0.422916
15	4.875	2	0	0.962311	0.767345	0.796156	1.02127	1.2733	1.09954	1.21027	1.22324	0.852936	0.741914	1.05946	0.628125	0.995069	1.32834	1.70736	1.05805	1.13858	1.2556	0.828269	0.423384	1.60159	0.762206	1.10692	1.1572	NaN	1.58832	1.08398	1.02974	0.533607	0.432738	1.06291	0.735	1.21823	1.31085	0.847956	1.10108	1.23443	1.12881	1.32866	1.45768	1.0849	1.15899	1.21413	1.05145	1.29951	0.93347
15	5.6	7	1	0.712574	0.715388	1.30128	0.973075	0.577503	0.659379	0.490865	1.00333	1.04775	0.734654	1.21684	0.506815	0.919921	1.43365	0.739075	0.766704	0.465117	1.11295	0.35038	0.939339	0.972341	0.754428	0.660811	0.683447	NaN	0.27175	0.648425	1.36706	1.03773	0.792454	0.792058	0.729706	1.09005	1.07636	1.01138	1.1413	0.908548	0.812446	1.13232	1.10909	0.929017	0.924191	0.938465	0.771486	0.619913	0.462571
15	6.45	3	0	0.800524	1.42919	0.845149	1.06292	0.500632	1.06405	1.01064	1.25351	1.45145	1.32035	0.784468	0.810221	1.11448	1.43852	1.73893	1.78094	1.18696	1.58143	1.18157	1.65574	0.511054	0.953524	0.99315	1.33221	NaN	0.629553	1.24804	1.21723	0.733127	1.44038	0.603456	1.22381	1.29557	1.12109	1.0178	0.951638	0.885441	1.54295	1.02166	1.49881	1.02724	1.41444	1.09677	1.69022	1.22801	1.4556
15	10	3	0	0.216946	0.377352	0.228242	0.469881	0.235425	0.247912	0.347741	0.30285	0.663824	0.572505	1.28531	1.4779	0.352652	0.244455	0.44974	0.0679581	0.13126	0.212795	0.185276	0.116817	0.293304	0.35585	0.169642	0.163105	NaN	1.27153	0.252855	0.125905	0.965507	1.078	0.0822011	0.114299	0.258102	0.285012	0.158334	0.203012	0.243758	0.226805	0.180486	0.217264	0.311811	0.142521	0.201756	0.208169	0.345314	0.345406
15	10.2	10	0	0.708057	0.454379	0.520774	0.51911	0.413229	0.232181	0.241663	0.155086	0.362195	0.655476	0.829958	1.19389	0.36885	0.187918	0.0418192	0.154812	0.0876247	0.353129	0.101161	0.170854	0.199567	0.199667	0.312222	0.246791	NaN	0.545435	0.265704	0.226742	0.996942	1.29576	0.415292	0.258174	0.370476	0.320678	0.261737	0.369326	0.308295	0.24494	0.327987	0.278993	0.18752	0.36635	0.198767	0.204226	0.193136	0.124132
15	10.75	4	1	0.535929	0.615683	0.628764	0.603766	0.470856	0.380365	0.940366	0.38295	1.36565	0.608611	0.611697	1.04599	0.616568	0.450826	0.643348	0.61021	0.562688	0.44742	0.566874	0.437476	0.53697	0.425008	0.68179	0.51156	NaN	1.31257	0.896229	0.510029	0.503445	0.649702	0.971274	0.841849	0.763335	0.688057	1.12633	0.8	1.07583	0.541545	1.14641	0.623694	0.611687	0.353471	0.599797	0.345929	1.01212	0.307677
15	11.425	3	1	0.520349	0.747579	0.521448	0.631258	0.762909	0.739937	0.882904	0.606449	0.982617	0.619926	1.10922	1.55857	0.678826	0.547176	0.586881	0.581597	0.429106	0.579613	0.27486	0.346517	0.503894	0.628508	0.46013	0.392003	NaN	1.30994	0.588297	0.362327	1.17551	1.23579	0.655075	0.490898	0.44522	0.237385	0.518373	0.226846	0.577036	0.295575	0.43552	0.189027	0.38353	0.391289	0.62989	0.39367	0.980792	0.556034
15	12.825	5	1	0.966622	0.955883	1.00865	0.799978	1.17717	1.05877	1.01183	1.25528	1.57682	1.65266	1.20531	1.33926	1.22976	1.02175	1.60303	1.6146	1.28207	1.16969	1.31596	1.07129	1.13927	1.08061	1.34084	1.18825	NaN	1.36108	1.15959	0.968481	1.26766	1.15749	1.52059	0.917462	1.24329	1.03112	0.880678	0.906142	1.04928	1.02857	0.870417	0.829001	1.43493	0.703797	1.15223	1.25084	1.526	0.89866
15	14.15	4	0	0.97312	0.969867	1.31798	1.17979	1.39787	1.12346	1.09592	1.10249	1.04534	1.08326	1.04034	1.32454	1.18096	0.73327	1.57344	1.17409	1.26992	0.613931	0.889031	1.08668	0.706023	0.853353	1.17921	1.04713	NaN	1.01337	1.15374	1.11619	1.06223	1.02449	1.20829	0.811581	1.23046	1.15567	1.13281	1.05929	0.798716	0.749233	1.12325	0.791224	1.05957	0.576109	1.07839	0.750114	1.14016	1.57716
15	15.025	32	0	0.775496	0.601453	0.70335	0.409706	0.930161	0.523074	0.487685	0.959998	0.922009	0.440788	0.992424	1.1162	0.495167	0.455478	0.327859	0.560201	0.513323	0.814932	0.511992	0.953846	0.700007	0.940029	0.598178	0.641526	NaN	0.830943	0.820966	0.738123	1.30881	0.808575	1.09244	0.589993	0.597576	0.882986	0.399744	0.676995	0.680415	0.663908	0.66322	0.88833	0.629093	0.704366	0.421475	0.692575	0.28577	0.271702
15	15.75	1	1	1.15004	1.40776	0.761049	1.04073	0.601164	0.782464	1.16275	0.890584	0.355355	0.979921	0.840309	0.87425	0.841757	0.886917	0.481079	0.628506	1.03401	0.686314	0.513603	1.0214	0.825118	0.7298	0.556025	0.749415	NaN	0.565161	0.613039	0.467404	0.837087	0.805283	0.719793	0.83162	0.901381	0.658274	0.704666	0.657435	0.870516	0.580744	0.788722	0.637926	1.07446	1.01252	0.843566	0.760262	0.632644	0.56198
15	16.55	1	1	1.04684	1.21592	1.35074	1.45277	0.973219	0.895689	1.07749	0.878956	1.23804	1.01427	0.467395	0.736623	0.772674	0.755087	0.720426	0.902394	0.926352	0.648921	1.10357	1.44039	0.447672	0.452357	0.51705	0.796889	NaN	0.377135	0.473091	0.601066	0.864358	0.839923	1.37264	1.08992	1.3726	1.23713	1.33791	1.13903	1.21013	1.19008	1.2204	0.883893	1.04653	1.21851	1.02186	0.846738	1.55979	0.986318
15	17.175	2	1	1.27123	1.11639	1.46493	1.5298	1.78262	1.57249	1.59957	1.56522	1.1856	1.23375	1.51126	1.2644	1.32278	1.13405	0.771865	0.814962	1.46359	1.13323	1.75789	1.58796	1.56591	1.13935	1.38869	1.39181	NaN	1.44304	1.46194	1.61796	1.11344	0.746849	1.62583	1.46169	1.61506	1.34156	1.45305	1.10914	1.49643	1.2796	1.66712	1.17529	1.6048	1.49056	1.49059	1.26403	1.64019	1.01509
15	19.5	2	1	0.829395	0.788311	0.549312	0.540194	0.43953	0.379193	0.271838	0.33599	0.317008	0.73328	0.291801	0.269156	0.446975	0.281383	0.539764	0.766189	0.351765	0.660702	0.613724	0.725935	0.490981	0.521278	0.541492	0.623379	NaN	0.0858579	0.489798	0.45702	0.496826	0.532813	0.535383	0.526784	0.596975	0.852961	0.659537	0.870556	0.587807	0.627113	0.51865	0.938996	0.819228	0.763563	0.44307	0.709091	0.200175	0.618028
15	19.65	2	1	1.08088	0.633407	0.818577	0.435688	0.745887	0.557859	0.300252	0.47295	0.229439	0.693047	0.163389	0.305734	0.241945	0.118163	0.346895	0.260038	0.531755	0.360354	0.650431	0.57679	0.504263	0.261651	0.620401	0.34531	NaN	0.123845	0.497811	0.380335	0.281961	0.112762	0.513977	0.536943	0.556945	0.610148	0.524916	0.837031	0.81697	0.911533	0.862944	0.599535	1.31283	0.663324	0.425162	0.731134	0.826167	0.823646
15	20.2	2	1	0.710111	0.686667	0.668723	0.816148	0.370476	0.455734	0.452501	0.604336	1.23561	0.458957	0.671609	1.29251	0.531272	0.318707	0.28007	0.914356	0.651572	0.754643	0.720411	0.554097	0.398824	0.533249	0.818332	0.776934	NaN	0.573067	0.841377	0.564364	0.973425	1.05798	0.801598	1.08981	0.89824	0.908228	0.706137	0.982534	0.620402	0.73296	0.75732	0.731081	0.444858	1.0371	0.375508	1.09615	0.393591	0.634231
15	20.525	4	0	0.843315	0.901996	0.89691	0.957089	0.743502	1.00954	0.466733	0.439133	0.676762	0.3897	0.730785	1.1569	0.429568	0.292516	0.315217	0.718784	0.519156	0.738623	0.758629	1.0972	0.590542	0.66051	0.787436	0.87144	NaN	0.425299	0.712788	0.534713	1.08539	1.10411	0.8857	1.12582	0.58688	0.796682	1.16531	1.16152	1.13608	1.1677	0.941687	1.10663	1.0156	1.21891	0.334733	0.999588	0.28848	0.539268
15	21.125	2	1	0.802952	0.620385	0.515346	0.516366	0.631781	0.533192	0.229821	0.205721	0.551806	0.56248	0.240222	0.382716	0.27518	0.301367	0.331108	0.563738	0.525802	0.813418	0.738138	0.440788	0.846016	0.680164	0.695542	0.603069	NaN	0.109831	0.354956	0.502373	0.844593	0.737341	0.61581	0.338839	0.768764	0.640949	0.645416	0.567148	1.10779	0.848313	1.07941	0.529404	0.860687	0.872033	0.317768	0.305403	0.633026	0.805849
15	23.25	1	1	0.525804	0.645632	0.54728	0.75674	1.07319	0.608305	1.25777	1.53101	1.55997	1.53012	1.70974	1.61256	1.47468	1.72669	1.84124	1.40384	1.40979	0.990247	0.773134	0.729561	1.0958	1.17329	1.06242	1.06842	NaN	1.80664	1.16705	1.37689	1.49766	1.57062	0.599621	0.53376	0.591302	0.730844	0.459537	0.373159	0.455873	0.59192	0.702956	0.561462	0.510783	0.686846	1.39556	1.04962	0.705416	0.754579
15	23.7	2	0	0.58464	0.689096	0.316607	0.709265	0.496705	0.360968	1.02599	0.988939	1.10708	0.67929	1.42435	1.61322	0.929257	1.17075	0.732004	0.674033	0.843588	0.777487	0.32445	0.55454	0.585455	0.596804	0.6556	0.860776	NaN	1.64558	0.833156	0.78707	1.0326	0.891536	0.747813	0.448395	1.0153	1.15159	1.117	0.917555	0.623594	0.498935	0.964853	0.807208	0.225334	0.671302	0.854874	0.894463	0.244316	0.218632
16	1.55	10	0	0.348497	0.435575	0.697491	0.703908	0.743551	0.54772	1.02305	0.730214	0.697207	1.21134	0.145592	0.406425	0.289364	0.299206	0.270896	0.565059	0.376442	0.575569	0.731557	0.982262	0.474557	0.619419	0.485149	0.542462	NaN	0.0695088	0.641128	0.742832	0.333556	0.467502	0.471295	0.302674	0.711568	0.540913	0.459589	0.339549	0.49509	0.218837	0.531624	0.512689	0.637052	0.506784	0.661512	0.664159	0.905067	0.456693
16	1.775	6	1	0.303981	0.302696	0.526514	0.512482	0.405086	0.749276	0.526384	0.504741	0.551301	0.68138	0.155465	0.521428	0.315044	0.377935	0.569227	0.562126	0.833843	0.378308	0.47391	0.480014	0.446441	0.415986	0.452896	0.450176	NaN	0.224687	0.325754	0.737389	0.415143	0.348126	0.450754	0.583979	0.840217	0.309352	1.1198	0.468549	0.312738	0.338602	0.889694	0.407076	0.70394	0.305485	0.507905	0.474291	0.613964	0.196335
16	2.6	6	0	0.962446	0.820899	1.01315	0.400019	0.768803	0.749702	0.396346	1.29103	0.378551	0.94238	0.253626	0.712834	0.312076	0.639558	0.700844	0.685539	0.940305	0.890708	0.831352	0.923668	0.678942	0.529855	0.565897	0.624257	NaN	0.401994	0.361295	0.723825	0.402544	0.638171	0.831255	0.931924	0.617679	0.504803	0.796493	0.559769	0.456706	0.369148	1.23175	0.663998	0.812924	0.576654	0.511262	0.588418	0.941684	0.668937
16	3.2	7	0	0.834536	1.06141	1.01941	0.820687	1.33894	1.02358	1.47716	1.6447	1.00272	1.33409	1.47652	1.49019	1.50722	1.0652	1.59467	1.58424	1.51304	1.53716	0.889372	1.21574	1.30072	1.52128	1.39918	1.22995	NaN	1.45548	1.15317	1.38765	1.37928	1.60169	0.989136	0.939851	0.866287	1.52799	1.20346	1.75334	1.18682	1.51093	0.84601	1.31103	1.30586	1.52935	1.26727	1.31494	1.57492	1.56116
16	4.875	8	0	1.66537	1.60312	1.59104	1.49937	1.39305	1.7013	0.936524	1.39407	1.16682	1.49612	1.01142	1.13161	1.00399	0.841098	1.30635	1.40944	1.3833	1.36444	1.69504	1.60218	1.65095	1.73974	1.77805	1.82074	NaN	1.11218	1.25569	1.57409	0.854131	0.810811	1.42027	1.32755	1.50508	1.37279	1.58759	1.25523	1.34837	1.45629	1.67761	1.40466	1.50802	1.34042	1.46173	1.6392	1.45281	1.09991
16	5.6	5	0	0.690097	0.807112	0.729289	1.0948	0.961253	0.690951	0.573969	0.434981	0.916502	0.504576	0.500897	0.589733	0.619222	0.733892	0.564528	0.534516	0.437057	0.332148	0.507649	0.593393	0.474947	0.375587	0.626722	0.569516	NaN	1.27681	0.960472	0.40935	1.16786	0.963601	0.845364	0.490246	0.737525	0.174083	0.690201	0.121783	0.662427	0.459768	0.80319	0.484684	0.872415	0.751933	0.329358	0.302818	0.713911	0.224397
16	6.45	8	0	1.16682	1.26447	0.9232	1.10565	0.71271	0.613187	0.579117	0.218226	0.864224	0.395022	0.459996	0.685735	0.578521	0.557313	0.627524	0.475355	0.95679	0.541556	0.48603	0.911682	0.812321	0.860465	0.518739	0.527091	NaN	1.12983	0.444218	0.432455	0.8116	0.913439	0.729067	0.730847	1.01264	0.586861	1.26745	0.765547	0.556573	0.661032	0.962797	0.865402	0.497385	1.11825	0.592506	0.449411	0.43783	0.529029
16	10	6	0	1.21913	1.12098	1.50999	1.10586	1.12322	1.20598	0.781234	1.054	1.24961	1.51627	0.785984	0.753519	0.741224	0.919478	0.304356	0.959539	0.441166	1.31326	0.986451	1.31863	0.64854	1.09166	1.03158	1.03947	NaN	0.632546	1.27786	1.50698	0.58247	0.997692	0.963339	1.13908	1.38273	1.68688	1.09076	1.41771	1.32119	1.30805	0.953416	1.34187	0.974483	1.4027	1.18067	1.31365	1.01032	1.71043
16	10.2	8	0	0.531399	0.890485	1.05175	1.12723	0.599974	0.643115	0.747044	0.716154	0.723847	1.09122	0.75632	1.10035	0.648513	0.846442	0.569824	1.13426	0.869146	1.0885	0.961666	1.36129	0.575423	0.802187	0.65084	0.642986	NaN	0.188819	0.668531	0.757038	0.789147	0.636011	0.8402	1.04952	1.10583	1.16566	1.22927	1.39387	1.00945	0.93198	0.635816	1.10264	0.627245	1.24259	0.97861	1.29216	0.56962	1.61619
16	10.75	8	0	1.0695	0.924552	0.602723	0.629729	1.04149	1.1572	0.645656	0.842842	0.680391	0.519964	1.02198	1.24075	1.42129	0.986395	1.4538	1.43263	0.811271	0.949648	1.22525	0.813467	1.17593	0.925243	1.0838	0.957628	NaN	1.5007	0.628421	0.875405	1.41632	1.08022	1.01376	1.05585	0.946332	1.07308	0.868249	0.671579	0.625515	0.825315	0.57998	0.505942	0.900442	0.830351	0.844122	0.656266	0.833756	1.18283
16	11.425	5	0	0.796792	0.620922	0.723204	0.67857	0.263147	0.510101	0.526596	0.806654	0.970424	1.02096	0.449378	0.94355	0.687837	0.539188	0.64496	0.584139	0.61635	0.807071	0.734936	0.529361	0.904156	0.749343	0.504626	0.467598	NaN	0.483205	0.231061	0.463659	0.494179	0.721691	0.575389	1.0838	0.815566	0.582114	0.715592	0.581448	1.27898	0.839137	0.713574	0.746016	0.883377	0.588075	0.573158	0.466678	0.950214	0.564337
16	12.825	7	0	0.972731	1.33117	1.06774	1.53624	1.71204	1.57539	1.0264	1.24937	0.865446	1.01454	0.91605	1.5184	1.14266	1.40142	0.673489	1.7239	0.62658	0.881026	1.0838	1.32894	1.08708	1.14389	1.23164	1.51256	NaN	1.78278	0.852067	1.35799	1.52904	1.46648	1.18125	1.40697	1.26137	1.1296	1.34465	1.04429	1.23923	1.04128	1.40015	1.30021	1.33843	1.11178	0.978059	1.40537	0.941631	0.433279
16	14.15	7.66667	1	0.669452	0.553264	0.695222	0.582389	0.775534	0.652383	0.785777	0.812736	0.686634	0.791557	0.650417	0.759548	1.13581	0.868884	1.18166	1.10558	0.519005	0.866392	0.769124	0.70418	0.520318	0.549112	0.610931	0.844909	NaN	0.243197	0.464891	0.425342	1.18845	0.902477	0.379098	0.81037	0.755785	1.15201	0.830384	0.975419	0.890956	1.157	0.928349	1.25349	0.620376	0.87573	0.637638	0.790359	0.713642	0.940482
16	15.025	4	1	1.21319	1.26979	1.57537	1.32353	0.852298	0.695567	1.00597	0.907058	1.15888	1.45488	0.896757	1.05882	0.878192	0.515805	0.732393	0.509013	0.818239	1.18003	1.42275	1.17859	1.19436	1.01333	0.647261	0.764145	NaN	0.405564	1.10203	0.907188	0.790593	0.952509	1.30606	1.41901	0.990443	0.974832	0.992673	1.13232	0.771933	0.699347	1.12993	0.883226	0.980681	1.2331	1.39301	0.908138	1.01959	0.991971
16	15.75	4	1	0.8121	1.01202	1.13187	1.08952	1.34148	1.5977	0.746794	1.08293	0.790168	1.531	0.405539	0.501661	0.658499	1.00483	0.782433	0.933559	1.07765	0.894063	0.815367	0.938717	0.754298	0.670792	0.908454	1.01304	NaN	0.0293606	1.62269	1.55818	0.980346	1.08229	1.54032	1.23921	1.44876	1.61726	1.56605	1.58055	0.818352	1.04176	1.17553	1.57722	0.639976	0.815392	1.05684	1.14397	1.33936	1.26657
16	16.55	7	0	0.500014	0.498599	0.553157	0.732422	0.502794	0.391266	0.902118	1.06463	0.757579	0.51076	0.36659	0.232416	0.394015	0.539748	0.873189	0.672282	0.418015	0.661458	1.05147	1.34462	0.626805	0.503002	0.4559	0.674066	NaN	0.0473253	0.369763	0.509912	0.211843	0.198011	0.623956	1.01145	0.85455	0.890704	0.860184	1.04739	0.839318	1.04909	0.443291	0.819762	1.23829	1.21024	1.17458	0.71554	0.955208	0.866416
16	17.175	3	0	0.919238	0.963195	0.411936	0.735044	1.08947	1.25687	0.488441	0.378304	0.705504	1.02533	0.771834	1.00561	0.609221	0.705699	1.19502	0.347894	1.03387	0.868491	0.896768	1.00695	0.964003	0.863984	1.26147	0.946996	NaN	0.0450561	1.34756	1.35182	1.38878	1.13414	0.689136	0.812062	1.12898	0.858076	1.07871	0.975404	0.655467	0.637644	1.28411	1.16362	0.52517	0.478205	1.15748	0.673522	0.909717	0.572106
16	19.5	10	0	1.52984	1.54771	1.34934	1.41619	1.44625	1.30697	1.47127	1.43631	0.795059	1.28112	1.40659	1.3065	1.12596	1.1465	1.31446	0.981259	1.51427	0.997421	1.40067	1.56132	1.55929	1.44452	1.59595	1.64385	NaN	1.62793	1.44388	1.54245	1.28945	1.21163	1.19881	1.13275	1.10314	0.958055	1.11975	1.36594	0.792936	1.06858	1.44433	1.30896	1.48814	1.15163	1.03993	0.782421	1.15181	1.15196
16	19.65	4	0	1.33868	1.15835	0.820536	1.12544	0.985178	0.532518	1.5424	1.62439	1.00926	0.864182	1.32802	0.962501	1.42366	1.27755	1.40862	0.954705	1.61266	0.930556	1.35703	1.22049	1.30537	1.40961	1.15544	1.25849	NaN	1.7456	1.01862	0.945369	1.38445	1.42351	1.37848	0.685714	0.921816	1.01624	0.601263	0.569319	0.824947	0.609071	1.1303	0.592032	0.971017	0.869828	1.25613	0.618115	1.1242	0.702403
16	20.2	5	1	0.604245	0.943591	0.86342	0.627541	0.922296	0.56411	0.62937	0.627719	0.925899	0.864037	0.381417	0.548582	0.714663	0.801528	0.967369	0.73719	1.34106	1.23697	1.13586	1.10383	0.881031	0.966659	1.19503	1.07663	NaN	1.3917	0.641988	0.850547	0.296703	0.417193	0.554582	0.175664	0.591712	0.686399	0.874385	0.45246	1.07813	0.897789	0.857782	0.692466	0.593817	1.14652	1.10923	1.22511	0.966092	0.789884
16	20.525	3.5	1	0.523469	0.709982	0.621373	0.845996	0.858714	0.847265	1.38541	0.951434	0.840626	1.13308	0.291451	0.308443	0.886203	0.877216	0.666651	0.624121	0.674134	0.996869	0.789621	0.783777	0.442296	0.529907	0.642068	0.641297	NaN	0.162572	0.755254	0.865862	0.560658	0.472506	0.930003	0.799076	1.05005	1.19252	0.811393	0.726996	0.640019	0.613984	0.846434	1.15048	0.881757	0.902426	1.1523	0.893607	1.4999	0.989177
16	21.125	2	1	1.08515	1.31668	0.7162	0.959384	0.927233	1.46348	0.668092	1.15285	0.829238	1.40879	0.661423	0.930758	0.848567	1.35504	0.824727	1.12777	0.844712	1.53007	0.646681	1.09614	1.37308	1.40226	1.33377	1.16529	NaN	0.170084	1.27134	1.53305	1.27485	1.50524	1.22633	1.26761	1.41281	1.61518	1.53878	1.58145	1.15933	1.26319	1.36386	1.56167	0.966431	1.28606	0.936853	1.29896	0.524273	1.50654
16	23.25	3.83333	1	0.635267	0.355177	0.575641	0.57222	0.6517	0.442335	0.259186	0.461774	0.463983	0.857557	0.649703	0.836517	0.46103	0.512982	0.858139	0.764148	0.68948	0.531742	0.915934	0.646765	0.897647	0.600236	0.994048	0.507384	NaN	0.0586096	0.673684	0.845664	0.603043	0.746841	1.09257	1.17246	0.871413	1.30797	0.637235	1.02305	1.01031	0.938752	0.743928	0.573601	0.493238	0.450478	0.846326	0.935448	0.842603	0.933917
16	23.7	1.5	1	0.390526	0.520623	0.927867	1.2134	0.704395	0.893313	1.24055	1.62916	0.557461	0.384868	0.421839	0.250136	0.373624	0.476767	0.298344	0.870288	0.358189	0.447102	0.670642	0.592392	0.462344	0.566992	0.557893	0.643776	NaN	0.169201	0.248708	0.454506	0.290458	0.381807	0.755167	0.912737	0.490978	0.433262	0.401477	0.467779	0.653698	1.0948	0.75389	1.04316	0.411312	0.692925	0.515493	0.576397	1.15113	0.348054
17	1.55	4	0	0.478505	0.41824	0.650329	0.279262	0.644585	0.431503	0.632543	0.62402	0.330465	0.929531	0.671858	0.371957	0.183116	0.672544	0.203981	0.889197	0.731684	1.04622	0.521771	0.602521	0.423462	0.555788	0.792551	0.537544	NaN	0.381389	0.759903	1.47692	0.56745	0.634182	0.77439	0.625818	0.602266	0.74284	0.465326	0.494688	0.790462	0.860236	0.647402	0.923829	0.669081	0.787554	0.360542	0.68274	0.512299	0.385864
17	1.775	3	0	0.849613	1.33076	1.01406	1.41353	0.605486	0.424657	0.531244	0.580899	0.314408	0.867953	0.353046	0.538326	0.183065	0.389483	0.136139	0.439715	0.409123	0.77344	0.384696	0.565107	0.446171	0.817765	0.597692	0.620828	NaN	0.267349	0.33764	0.708504	0.563387	0.507137	0.988074	1.51985	0.592065	0.561375	0.451819	0.450986	0.969293	0.992043	0.325663	0.804282	0.793398	1.47428	0.305619	0.535184	0.427349	0.299592
17	2.6	1	1	1.41431	1.37654	1.26232	1.28619	0.740101	0.581515	0.672303	0.812413	0.613415	0.326424	0.638777	0.95032	1.18397	1.47469	0.708254	1.12853	1.0586	1.17461	0.671039	0.867584	1.13632	1.11254	0.725021	0.611718	NaN	0.918071	0.232842	0.536612	0.455228	0.694475	1.02977	1.06433	0.852665	0.935217	0.584984	0.692897	1.27192	1.18175	0.840812	0.728206	1.28942	0.993504	0.58144	0.814185	0.689985	1.05402
17	3.2	3.66667	0	0.873598	0.584411	0.83751	0.584148	0.698231	0.818278	0.768445	0.937144	0.366553	1.00842	0.819221	0.620769	0.5763	0.736474	0.837756	0.519587	0.748003	1.04006	0.591208	1.2626	0.819364	0.630628	0.907191	0.949964	NaN	0.217332	0.780573	0.87328	0.57074	1.25088	0.633829	0.740366	0.5355	0.676166	0.485297	0.459225	0.313831	0.359747	0.848564	0.856188	0.888111	1.02362	0.657913	0.743483	0.924189	1.47584
17	4.875	4	0	1.01241	0.785298	0.934923	1.30212	1.22449	1.44662	0.918144	1.23916	1.10591	1.24869	0.343538	0.421073	0.953719	0.982051	0.964076	0.338748	0.6483	0.645715	0.840892	0.767355	0.857864	0.657873	0.730965	0.717596	NaN	0.856729	0.864709	0.645649	0.239837	0.646948	1.46309	1.02445	1.2103	1.0368	1.38858	1.1481	1.38866	1.2753	0.947106	0.782775	0.925591	1.03298	0.894609	0.883843	0.798913	0.855084
17	5.6	3	0	1.05408	0.99515	0.859225	0.707577	0.674975	0.857015	1.18126	1.3149	1.37474	1.17833	1.17106	0.54209	1.63055	1.39025	1.42121	1.6731	1.66941	1.15847	1.40022	1.18749	1.3231	1.02437	1.10221	0.940559	NaN	0.395258	0.845192	0.749758	1.71037	0.918598	0.798201	0.359496	1.23	1.03566	1.26001	0.873129	1.01391	0.711082	1.43842	1.17772	1.35446	1.08918	1.23943	1.13273	1.08082	0.994193
17	6.45	1	0	0.887598	0.718818	0.639599	0.667018	1.26721	1.33968	1.30745	1.36909	1.13464	0.929185	1.28009	1.35199	0.871195	0.914203	0.73767	0.805548	1.15443	1.1229	1.44123	0.800113	1.23364	1.14441	1.19819	1.00966	NaN	0.746534	1.40345	0.939215	1.53946	0.855116	0.787521	1.10997	1.11092	0.933736	1.18973	0.934971	0.864428	0.988082	0.898992	1.35998	1.22205	0.979221	1.1549	1.18088	1.08161	1.23618
17	10	5	1	0.839149	0.969566	0.508641	0.657186	1.10189	1.21922	0.51945	0.675152	0.513064	0.327189	0.295782	0.884603	0.889603	0.956726	0.452468	1.2102	0.492388	0.724296	0.966857	0.863576	0.848524	0.743423	0.827995	0.858103	NaN	0.301605	0.95474	0.667404	0.784896	0.527662	1.05181	0.862554	0.72555	1.02336	0.758635	0.956402	1.23975	1.33828	0.82915	0.68037	0.814278	1.04437	0.903432	1.11136	0.502714	1.35412
17	10.2	5	0	1.16131	1.10583	1.44706	1.06689	1.40209	1.2622	0.704865	1.29749	1.36595	0.775493	0.561707	1.09068	0.660166	1.12921	0.429715	1.30968	1.04105	1.29013	1.03619	0.842856	0.846375	1.04713	0.659802	0.555245	NaN	0.522672	1.04004	0.751608	1.54288	0.740111	0.790204	1.05941	0.469917	0.86017	0.417664	0.729551	1.00781	1.04775	0.505315	0.596061	1.1492	1.02144	0.608911	0.74192	1.14063	1.3806
17	10.75	2	0	0.785643	0.467709	0.80632	1.25162	0.545761	0.553318	1.03954	0.970378	0.888395	1.11538	0.254218	0.483402	1.3302	1.15523	1.14511	1.13522	0.945785	0.789867	0.483642	0.733089	0.624224	0.4528	0.867735	0.636642	NaN	0.220105	0.998289	0.631552	0.460411	1.01423	0.649471	0.964775	0.804304	0.51826	0.545553	0.477773	0.574138	0.482354	0.529374	0.652147	0.551382	0.572762	0.803249	0.804263	0.77013	0.695315
17	11.425	0.5	0	0.649813	0.786037	1.23537	1.02949	0.762099	0.82272	1.57266	1.51616	0.725431	0.809921	1.24598	1.23286	1.13578	0.855025	0.758463	0.900455	1.31634	0.65432	0.890553	0.954899	1.04293	0.664405	0.69748	0.601075	NaN	0.343702	0.916003	1.05124	1.42471	1.35039	0.964983	1.02647	0.793015	0.484529	0.747145	0.531377	0.640396	0.37104	0.850656	1.04644	0.860795	0.912158	0.873424	0.757092	0.726392	0.905603
17	12.825	2	0	0.680809	0.642745	0.239605	0.270832	0.629411	0.870376	0.236763	0.608212	0.556538	0.789978	0.497902	0.898997	0.949031	1.04589	0.762188	0.819084	0.940571	1.28685	0.501292	0.740091	0.474198	0.604782	0.67073	0.790784	NaN	0.625396	1.00947	1.45314	0.167065	0.534432	0.722208	1.34696	0.550093	1.10344	0.9688	1.15639	0.787408	0.793736	0.929013	1.30071	0.633415	0.691193	0.611452	0.784596	0.614915	0.833537
17	14.15	3	0	0.816079	0.757115	0.951855	0.67874	0.397938	0.461764	0.490029	0.568446	0.868653	0.704088	1.05419	0.897404	1.09938	0.595106	1.16764	0.767759	0.860429	0.963312	0.563596	1.09738	0.786249	0.508684	0.377729	0.565503	NaN	0.512046	0.265891	0.774157	0.619811	1.18613	0.849046	0.596016	1.26695	0.790877	1.10466	0.665805	0.75861	0.658735	0.969508	0.767459	0.957968	0.665311	0.739862	0.66944	1.02732	0.578887
17	15.025	0.333333	1	0.867812	0.845554	0.538599	0.325195	0.565919	0.747074	0.215067	0.565243	0.697752	1.17848	0.402937	0.326533	0.607158	0.747868	1.10654	0.275578	0.765378	0.873713	1.00011	0.580649	1.08345	0.505763	0.431805	0.487467	NaN	0.233314	0.551989	0.838291	0.412665	1.27272	0.796555	1.13905	1.00734	1.07554	0.796058	1.03347	1.06025	0.598225	1.22049	1.18603	0.869041	0.862663	0.598151	0.782721	0.576284	0.904712
17	15.75	1	1	1.09637	1.18489	0.642872	0.433681	0.514507	0.530484	0.770823	0.570304	0.744116	0.671512	1.25584	1.00694	0.680613	0.666497	0.525701	0.688969	1.27543	1.11611	1.41056	1.19818	1.01622	0.947788	1.09731	0.928764	NaN	0.776353	1.20293	0.875884	1.38577	0.92309	0.829432	0.932354	1.53582	1.12439	1.50146	0.982461	1.27729	0.917275	1.51248	1.16147	1.42638	0.895205	0.896984	0.789066	1.18586	0.882764
17	16.55	1.5	1	0.915542	1.07794	0.360507	0.493498	0.539815	0.541141	1.48577	1.2686	1.39644	0.781206	0.841451	1.08631	0.969193	0.927806	0.671373	0.490168	0.662257	0.798589	0.911465	1.23445	0.977985	1.03461	0.805048	0.841274	NaN	0.0871754	0.595292	1.25782	0.572915	0.506444	0.841622	1.25589	0.722076	0.866554	0.517432	0.6151	1.31935	1.44206	1.00277	1.28288	1.3684	1.22081	0.697391	0.703616	0.829667	0.884076
17	17.175	2	1	0.753058	0.892422	0.751445	1.02796	1.02692	0.965087	1.37743	1.33034	0.893215	0.638413	1.26855	1.14648	1.13243	1.31266	1.44281	1.20566	1.33611	0.842835	0.825012	0.916864	1.06047	1.03135	1.19387	1.01299	NaN	1.11185	1.04244	0.982743	1.68509	1.40326	1.07749	1.30485	0.901209	1.22877	0.823396	0.880261	0.739016	1.0488	1.35177	1.11549	1.13015	1.17607	0.926894	0.941974	1.27148	1.67053
17	19.5	0.666667	1	1.07746	1.25857	0.839171	1.07654	1.54449	1.71139	1.12088	1.00969	1.43523	1.48216	0.778503	1.33575	0.953719	1.31529	0.470081	0.57967	1.00402	1.17351	1.36231	1.1008	0.924165	1.18395	1.04566	1.19723	NaN	1.77424	1.26133	1.45532	1.1484	1.14143	0.816009	0.758592	0.750534	0.754273	0.655945	1.00912	0.645503	0.908472	0.918733	0.634261	0.7613	0.584569	0.868477	0.957218	0.479221	0.782388
17	19.65	0.666667	0	0.86502	0.736591	0.59572	0.783966	1.23812	1.27991	1.21653	1.38683	1.53036	1.36917	0.788465	1.5005	0.760366	0.759678	0.829419	0.897693	1.15583	0.88315	1.39723	1.18832	0.931926	1.17785	0.883595	1.11391	NaN	1.5137	1.24564	1.62712	1.45242	1.05018	1.28057	1.12144	1.20909	0.912584	1.01284	1.03508	0.762706	1.18305	1.43683	1.23405	0.76651	0.576309	1.0427	0.632108	0.903805	0.741887
17	20.2	1	1	0.742106	1.11825	1.33604	1.07106	0.736275	0.381477	0.40031	0.387476	0.500904	1.18134	0.292986	0.823801	0.638444	0.7535	0.491812	0.465758	0.46954	0.834801	0.650499	0.772258	0.727099	0.587747	0.672588	0.763393	NaN	0.680057	0.719656	0.657613	0.193563	0.227579	0.609902	0.373577	1.09964	0.867565	1.38397	1.12424	1.17099	1.26303	0.695624	1.04263	0.750407	0.481149	0.493997	0.720073	0.636697	0.405027
17	20.525	2	1	0.862419	0.61651	0.918446	1.09069	0.728581	1.33923	0.875629	0.664325	1.41863	1.62449	1.21377	0.994131	0.54	0.972077	0.511519	0.528346	0.72871	0.862339	0.88646	1.18639	0.720027	1.02041	0.990314	1.2165	NaN	0.655021	0.680826	1.47316	1.74067	0.863051	1.34718	1.40414	1.13513	1.30009	0.759861	1.15315	1.17122	1.18303	1.29379	1.46485	0.657334	1.12703	0.887452	1.1151	1.2051	0.659049
17	21.125	0.5	1	1.31899	1.47895	0.475044	0.958463	1.52321	1.27056	1.08329	1.04586	1.06376	1.07941	0.615451	0.819729	0.654251	0.468307	0.927769	0.560197	0.717869	1.10855	1.17458	1.40032	0.778472	0.683363	0.858474	0.964554	NaN	0.477303	0.8848	1.50871	0.464685	0.650074	1.19192	1.3513	0.926217	1.17031	0.710816	1.08615	0.884587	1.05853	0.670866	1.4015	1.30614	1.16266	0.523163	0.755206	1.17067	0.96101
17	23.25	1	1	0.689732	0.850699	1.09377	1.41048	0.548081	0.800264	0.96454	0.903889	1.03383	0.868549	1.09586	0.799487	1.11152	0.704694	0.987563	0.905767	1.15308	0.689814	0.907504	0.962026	1.00698	0.683772	1.12429	0.922557	NaN	0.519073	1.26379	1.30425	1.57447	1.47191	1.28449	1.21161	1.10138	1.09191	1.15484	0.782553	0.982224	1.00348	1.22885	1.10897	1.26279	1.20355	1.06458	1.08059	1.5093	1.00825
17	23.7	2	1	0.910691	0.998145	1.06188	0.784987	0.681618	0.686174	1.34685	0.897709	1.43942	1.03309	1.30941	1.07841	1.15778	0.996428	1.285	0.862913	0.629993	0.673964	0.758664	0.637714	1.17914	0.744268	1.13301	0.945668	NaN	0.43146	0.818522	0.599661	1.29235	1.04569	0.545523	0.993955	1.10473	1.10316	1.23642	1.03144	0.485136	0.962966	0.792039	0.567462	0.586316	0.542813	1.25233	1.21233	1.22262	0.779526
[truncated: 40 more columns]
