# Supplementary material for: Neural pattern change during encoding of a narrative predicts retrospective duration estimates
Source: eLife journal article supplement (doi:10.7554/elife.16070), 2016-11-01
Supplement: supp [file elife_poa_e16070_Table_1.xlsx]

## Sheet: Sheet1
	Multivariate		Multivariate (-ROI size)		Univariate
Region	FWHM (TRs)	Ranking	FWHM (TRs)	Ranking	FWHM (TRs)	Ranking
Right entorhinal	M=18.9, SD=13.8	3rd	M=1.2, SD=1.9	4th	M=23, SD=15.6	1st
Left caudal ACC	M=8.3, SD=1.8	66th	M= -0.5, SD= 0.5	67th	M=9.2, SD=3.8	46th
Right transverse temporal cortex	M=7.3, SD=1.2	80th	M= -0.8, SD= 0.5	83rd	M=7.9, SD=1.2	68th
Right banks of superior temporal sulcus	M=9.0, SD=2.1	48th	M= -0.3, SD= 0.4	49th	M=8.8, SD=1.7	61st
Right superior temporal cortex	M=11.0, SD=3.1	28th	M= 0.4, SD= 0.6	18th	M=10.3, SD=2.4	34th
